# Supplementary material for: Identification of Central Nervous System Oncologic Disease Biomarkers in EVs from Cerebrospinal Fluid (CSF) of Pediatric Patients: A Pilot Neuro-Proteomic Study
Source: Biomolecules. 2023 Nov 30;13(12):1730. doi: 10.3390/biom13121730 (PMC10741637; doi:10.3390/biom13121730)
Supplement: Supplementary file 1 [file biomolecules-13-01730-s001.zip › biomolecules-2709384-supplementary Tables.xlsx]

## Sheet: Table S1
Table S1. List of all identified proteins inextraventricular drainage of cerebrospinal fluid obtained from congenital hydrocephalus. For each protein is reported all statistical and bioinformatic results including gene ontology terms. The “+” symbol indicates proteins identified in total (Tot), microvesicle (Mv) or exosomal (Ex) fractions, those that are statistically significant or highlighted b…
Uniprot code	Protein names	Gene names	Presence.CTR.Tot	Presence.CTR_Ex	Presence.CTR_Mv	Mean Tot	Mean Mv	Mean Ex	Total Significant proteins	Significant Mv_Tot	Significant Ex_Tot	Significant Mv_Ex	Core panel of ranked proteins	At least one	In all	Highlighted to maximize discrimination of the three fractions	Highlighted to maximize discrimination between Tot and Mv fractions	Highlighted to maximize discrimination between Tot and Ex fractions	Highlighted to maximize discrimination between Mv and Ex fractions	Nervous system disease	Central Nervous system neoplasm	Enrichment Epilepsy	Astrocytoma	Medulloblastoma	Enrichment Synapse	Synapse Epilepsy Interactor	GABAergic synapse	Cholinergic synapse	Serotonergic synapse	Glutamatergic synapse	CD Name	MEROPS Name	Kinase HGNC Name	plasma membrane	Golgi	endoplasmic reticulum	mitochondrion	Organelli	cytoplasm	nucleus	ANOVA -Log10 P-value	VIP-Score for discrimination of the three fractions	SVM ranks for discrimination of the three fractions	AUC Tot_Mv	Pval Tot_Mv	AUC Tot_Ex	Pval Tot_Ex	AUC Ex_Mv	Pval Ex_Mv
A0A075B6H9		IGLV4-69	+	+	+	22.1942	21.3456	24.7861	+			+		+																				plasma membrane							2.01923	0.45266	970	0.609375	0.366075	0.828125	0.042506	0.875	0.00218566
A0A075B6I0		IGLV8-61	+	+	+	25.1174	21.6194	24.6463	+	+				+																				plasma membrane							1.55521	0.31492	1130	0.875	0.0035815	0.546875	0.722355	0.828125	0.0146829
A0A075B6I4		IGLV10-54	+			21.52	20.9916	21.3396												Nervous system disease														plasma membrane							0.0299886	0.0035002	1615	0.546875	0.602636	0.546875	0.864611	0.59375	0.599153
A0A075B6K4		IGLV3-10	+	+		26.7007	20.8222	21.8926	+	+	+			+																				plasma membrane							4.28549	0.97316	518	1	1.23409e-09	0.875	0.000586153	0.515625	0.351914
A0A075B6K5;A0A075B6K2		IGLV3-9	+	+	+	24.2882	21.6124	24.9576	+	+		+		+																				plasma membrane							3.14584	0.72432	730	0.9375	0.00192144	0.5625	0.384055	1	3.03567e-06
A0A075B6P5;P01615;A0A087WW87;P01614	Ig kappa chain V-II region FR;Ig kappa chain V-II region Cum	IGKV2D-28;IGKV2-40	+			25.4899	20.8999	21.4079	+	+	+			+																				plasma membrane							5.75992	1.283	317	1	8.4254e-08	0.984375	4.41836e-06	0.75	0.221677
A0A075B6R2		IGHV4-4	+	+	+	25.0867	22.5071	25.0284	+	+				+								epilepsy												plasma membrane							1.4436	0.28562	1163	0.9375	0.00199388	0.546875	0.956102	0.765625	0.0334138
A0A0C4DH68;A0A075B6R9		IGKV2-24;IGKV2D-24	+	+		26.9837	20.5777	26.5669	+	+		+		+																				plasma membrane							5.27385	1.19	373	1	4.48906e-06	0.59375	0.726003	0.953125	7.13295e-06
A0A075B6S2;A0A0A0MRZ7		IGKV2D-29	+	+	+	28.892	24.8167	29.5753	+	+				+																				plasma membrane							3.17649	0.73285	721	1	3.26568e-05	0.71875	0.287686	1	1.00748e-06
A0A075B6S5		IGKV1-27	+	+		24.407	20.6044	22.3645	+	+				+								epilepsy												plasma membrane							3.60665	0.84771	629	0.9375	0.000211713	0.734375	0.0600939	0.75	0.0632657
A0A087WSY6		IGKV3D-15	+	+		24.7937	20.8046	22.6206	+	+	+	+	+	+	+																			plasma membrane							9.67903	2.1037	73	1	1.98927e-06	0.84375	0.0127781	0.84375	0.0128088
A0A0A0MRZ8;P04433	Ig kappa chain V-III region VG	IGKV3D-11	+	+	+	28.772	22.2269	27.3939	+	+	+			+																				plasma membrane							6.65902	1.4806	231	1	1.30097e-06	0.875	0.00873857	1	7.50152e-06
A0A0A0MS15		IGHV3-49	+	+	+	26.4792	21.5641	23.8972	+	+				+								epilepsy												plasma membrane							3.59137	0.84165	632	1	1.12127e-06	0.828125	0.0412499	0.71875	0.0623537
A0A0B4J1V0		IGHV3-15	+			26.768	20.6565	21.0928	+	+	+			+								epilepsy												plasma membrane							7.63426	1.6649	162	1	7.37207e-08	1	5.53752e-07	0.515625	0.500519
A0A0B4J1V2		IGHV2-26	+	+		25.1455	20.5907	23.5963	+	+				+								epilepsy												plasma membrane							3.76872	0.87324	596	0.96875	1.83562e-05	0.609375	0.278677	0.828125	0.0275293
A0A0B4J1X5		IGHV3-74	+	+	+	28.8811	22.4064	28.0582	+	+		+		+								epilepsy												plasma membrane							6.87911	1.5282	213	1	1.34339e-06	0.703125	0.197607	1	3.20003e-06
A0A0B4J1Y8		IGLV9-49	+	+		25.0754	20.9116	25.3573	+	+				+																				plasma membrane							5.61351	1.2652	330	1	0.000144752	0.546875	0.772901	0.984375	1.17796e-05
A0A0B4J1Y9		IGHV3-72	+	+	+	27.0142	22.948	28.7845	+	+				+								epilepsy												plasma membrane							5.67444	1.2793	320	0.890625	0.000908714	0.804688	0.0622377	1	7.11373e-08
P0DP09;A0A0B4J2D9		IGKV1D-13	+	+	+	25.4475	21.0351	25.0776	+	+				+																				plasma membrane							2.81645	0.65184	793	0.9375	0.00063813	0.625	0.791075	0.859375	0.00216144
A0A0C4DH24		IGKV6-21	+	+		23.1408	20.6055	23.5206	+	+				+																				plasma membrane							2.04647	0.46301	960	0.875	0.00114392	0.515625	0.677037	0.9375	0.000726343
A0A0C4DH25		IGKV3D-20	+	+	+	26.2899	21.4961	24.8679	+	+				+																				plasma membrane							4.60028	1.03	472	0.890625	6.46555e-05	0.804688	0.184471	0.9375	0.000220147
A0A0C4DH29		IGHV1-3	+			24.9661	20.5032	21.0328	+	+	+			+																				plasma membrane							2.917	0.6755	772	0.890625	0.000874521	0.84375	0.00403797	0.609375	0.369043
A0A0C4DH31		IGHV1-18	+	+		25.801	20.5325	22.3545	+	+	+			+																				plasma membrane							4.57732	1.0227	475	1	1.44056e-07	0.914062	0.00184221	0.6875	0.055497
A0A0C4DH33		IGHV1-24	+			24.7164	20.9847	20.6248	+	+	+			+								epilepsy												plasma membrane							5.84126	1.2905	311	0.90625	9.75882e-05	0.921875	4.69843e-05	0.65625	0.360857
A0A0C4DH36		IGHV3-38	+	+		24.4169	20.6921	22.4401	+	+				+								epilepsy												plasma membrane							1.91566	0.41964	1005	0.8125	0.00243166	0.75	0.124612	0.75	0.0392434
A0A0C4DH38		IGHV5-51	+	+	+	28.195	21.5413	26.2833	+	+	+	+	+	+	+							epilepsy												plasma membrane							10.6786	2.3269	45	1	2.3991e-07	0.898438	0.00737532	0.96875	7.09199e-05
A0A0C4DH67;A0A0C4DH69		IGKV1-8;IGKV1-9	+	+		24.6182	20.7956	24.2964	+	+				+																				plasma membrane							2.41512	0.5657	871	0.90625	0.00032215	0.515625	0.778545	0.90625	0.00171759
A0A0C4DH72;P01599	Ig kappa chain V-I region Gal	IGKV1-6	+	+	+	26.3244	20.873	25.6892	+	+				+																				plasma membrane							5.81756	1.2891	312	1	2.55814e-06	0.65625	0.425397	1	3.55359e-07
A0AVF1;A0AVF1-3;A0AVF1-2	Intraflagellar transport protein 56	TTC26		+	+	21.7113	24.8445	23.6074	+	+				+						Nervous system disease																					1.80982	0.38045	1046	0.953125	0.000317178	0.625	0.120243	0.585938	0.354397
A0M8Q6	Ig lambda-7 chain C region	IGLC7	+	+	+	21.2641	20.7937	24.5829	+			+		+																				plasma membrane							3.37753	0.78408	673	0.578125	0.616267	0.84375	0.00845225	0.953125	0.000124587
A4D0S4;A4D0S4-2;A4D0S4-3	Laminin subunit beta-4	LAMB4			+	21.4158	24.3707	21.6452	+	+				+						Nervous system disease																					3.06533	0.70735	744	0.859375	0.00854133	0.5	0.702608	0.84375	0.0080816
A4D1F6	Leucine-rich repeat and death domain-containing protein 1	LRRD1		+		21.3107	20.8665	25.4082																																	7.65373	1.6649	161	0.75	0.355506	1	1.13001e-05	1	6.36935e-08
A4FU69-3;A4FU69;A4FU69-2;A4FU69-4;A4FU69-5	EF-hand calcium-binding domain-containing protein 5	EFCAB5	+	+	+	28.8061	22.7045	26.4329	+	+	+			+						Nervous system disease																					5.22172	1.1887	375	1	4.28359e-08	0.96875	0.000286656	0.984375	6.7434e-05
H3BQL2;H3BSY2-2;D6RF30;I6L899;P0CJ92;H3BSY2;F8WBI6;A6NMD2;A6NCC3;A6NC78	Golgin subfamily A member 8M;Golgin subfamily A member 8K;Golgin subfamily A member 8R;Golgin subfamily A member 8H;Golgin subfamily A member 8N;Golgin subfamily A member 8J;Golgin subfamily A member 8O;Putative golgin subfamily A member 8I	GOLGA8T;GOLGA8M;GOLGA8K;GOLGA8R;GOLGA8H;GOLGA8N;GOLGA8J;GOLGA8O;GOLGA8IP	+			23.9259	20.6182	21.6975	+	+	+			+						Nervous system disease															Golgi			Organelli			2.02002	0.45476	969	0.96875	0.000392217	0.84375	0.0183591	0.75	0.0667159
A6NE02;Q86XT2	BTB/POZ domain-containing protein 17	BTBD17		+	+	21.2018	26.4744	27.7894	+	+	+			+																				plasma membrane							2.81534	0.65122	794	0.859375	0.0117327	0.890625	0.000761467	0.507812	0.576618
A6NHL2-2;A6NHL2	Tubulin alpha chain-like 3	TUBAL3		+	+	20.7797	23.9808	22.5486	+	+				+																									cytoplasm		2.08893	0.47374	950	0.953125	0.00172222	0.765625	0.0506995	0.6875	0.206098
A6NLU5	V-set and transmembrane domain-containing protein 2B	VSTM2B	+		+	25.5259	21.4265	22.2554	+	+	+			+						Nervous system disease																					4.42158	1.0027	495	1	2.61484e-07	1	1.62326e-05	0.6875	0.146727
B0I1T2;B0I1T2-4;B0I1T2-3;B0I1T2-2	Unconventional myosin-Ig;Minor histocompatibility antigen HA-2	MYO1G		+	+	22.0927	23.2168	21.8454												Nervous system disease														plasma membrane					cytoplasm		0.388745	0.062498	1514	0.765625	0.0512605	0.5625	0.731973	0.765625	0.0837655
B2RUZ4	Small integral membrane protein 1	SMIM1		+	+	21.2201	23.8517	22.6817																										plasma membrane							0.780823	0.13121	1376	0.828125	0.0348669	0.703125	0.0328512	0.625	0.364912
P0DOX8;B9A064;P0CG04	Immunoglobulin lambda-like polypeptide 5;Ig lambda-1 chain C regions	IGLL5;IGLC1	+	+	+	29.6182	24.7872	28.7189	+	+		+		+						Nervous system disease														plasma membrane							4.66966	1.0545	458	1	7.82507e-05	0.796875	0.0708201	1	0.000234521
Q13765;E9PAV3-2;E9PAV3;Q9BZK3	Nascent polypeptide-associated complex subunit alpha;Nascent polypeptide-associated complex subunit alpha, muscle-specific form	NACA			+	21.4235	23.1519	21.6995												Nervous system disease	Central Nervous system neoplasm	epilepsy	Astrocytoma																cytoplasm	nucleus	1.04679	0.20633	1273	0.71875	0.0559921	0.5625	0.544752	0.65625	0.108037
I3L3R5	Coiled-coil domain-containing glutamate-rich protein 2	CCER2	+			23.5478	21.212	21.2045	+	+	+			+																											1.75477	0.37122	1057	0.875	0.00275847	0.890625	0.00452237	0.5	0.983811
O00142-5;O00142-2;O00142-3;O00142-4;O00142;O00142-6	Thymidine kinase 2, mitochondrial	TK2	+	+	+	26.5723	22.9993	25.2418	+			+		+						Nervous system disease	Central Nervous system neoplasm																mitochondrion	Organelli	cytoplasm		1.38583	0.2738	1180	0.734375	0.0551186	0.625	0.41505	0.8125	0.0128625
O00160	Unconventional myosin-If	MYO1F		+	+	21.2137	22.8679	22.6777	+	+	+			+						Nervous system disease	Central Nervous system neoplasm		Astrocytoma																cytoplasm		1.06109	0.20839	1269	0.8125	0.0282741	0.84375	0.0151462	0.5625	0.780725
O00161;O00161-2	Synaptosomal-associated protein 23	SNAP23		+	+	20.7991	25.5631	24.7355	+	+	+			+						Nervous system disease	Central Nervous system neoplasm		Astrocytoma		Synapse	Synaptosome								plasma membrane			mitochondrion	Organelli	cytoplasm		4.82798	1.084	437	1	4.63302e-09	1	1.34429e-07	0.84375	0.022478
O00168	Phospholemman	FXYD1		+	+	21.8363	24.948	24.0648	+	+				+						Nervous system disease	Central Nervous system neoplasm		Astrocytoma											plasma membrane							2.99664	0.68161	764	0.9375	0.000153442	0.75	0.047189	0.578125	0.41649
O00231;O00231-2	26S proteasome non-ATPase regulatory subunit 11	PSMD11		+	+	21.2236	24.0061	25.6495	+	+	+			+																										nucleus	3.7279	0.87094	602	0.90625	0.00748723	0.96875	0.000199321	0.734375	0.16439
O00233;O00233-2;O00233-3	26S proteasome non-ATPase regulatory subunit 9	PSMD9	+		+	21.433	21.6521	20.7026												Nervous system disease																			cytoplasm	nucleus	0.976914	0.19185	1296	0.53125	0.717219	0.640625	0.257385	0.734375	0.0895612
O00299	Chloride intracellular channel protein 1	CLIC1	+	+	+	24.1677	26.4359	24.035	+	+				+						Nervous system disease	Central Nervous system neoplasm	epilepsy	Astrocytoma											plasma membrane			mitochondrion	Organelli	cytoplasm	nucleus	1.00904	0.19881	1286	0.890625	0.00854634	0.515625	0.90019	0.882812	0.0137619
O00303	Eukaryotic translation initiation factor 3 subunit F	EIF3F			+	21.449	22.6322	21.9746												Nervous system disease	Central Nervous system neoplasm		Astrocytoma									M67.974									0.394031	0.063425	1511	0.734375	0.0478621	0.671875	0.308085	0.640625	0.325106
O00391;O00391-2	Sulfhydryl oxidase 1	QSOX1	+	+	+	27.6634	24.6067	24.1009	+	+	+			+						Nervous system disease	Central Nervous system neoplasm	epilepsy	Astrocytoma	Medulloblastoma											Golgi	endoplasmic reticulum		Organelli			4.92573	1.1068	422	0.96875	0.00018509	0.96875	0.00216189	0.546875	0.650253
O00410;O00410-3;O00410-2;O60518	Importin-5	IPO5		+	+	21.0776	23.4248	22.8023	+	+				+						Nervous system disease	Central Nervous system neoplasm		Astrocytoma												Golgi			Organelli	cytoplasm	nucleus	1.45284	0.28745	1159	0.84375	0.0146971	0.8125	0.0396532	0.546875	0.553163
O00461	Golgi integral membrane protein 4	GOLIM4	+		+	22.2659	20.3523	20.9263	+	+				+						Nervous system disease	Central Nervous system neoplasm		Astrocytoma												Golgi			Organelli			7.83219	1.6923	150	0.84375	0.00727762	0.734375	0.0735518	0.640625	0.30754
O00462	Beta-mannosidase	MANBA	+			23.6566	20.4515	21.2385	+	+	+			+						Nervous system disease														plasma membrane							3.22324	0.7427	712	0.875	0.000941188	0.84375	0.0112121	0.734375	0.155873
O00468-6;O00468-3;O00468-7;O00468-5;O00468-4;O00468;O00468-2	Agrin;Agrin N-terminal 110 kDa subunit;Agrin C-terminal 110 kDa subunit;Agrin C-terminal 90 kDa fragment;Agrin C-terminal 22 kDa fragment	AGRN	+	+	+	28.4328	24.2301	29.1528	+	+		+		+						Nervous system disease	Central Nervous system neoplasm	epilepsy	Astrocytoma		Synapse									plasma membrane	Golgi			Organelli			5.02391	1.1251	406	1	1.16105e-05	0.765625	0.0614699	1	2.38422e-06
O00499-9;O00499-10;O00499-7;O00499-8;O00499-4;O00499-6;O00499-11;O00499-3;O00499-2;O00499-5;O00499	Myc box-dependent-interacting protein 1	BIN1	+		+	22.5443	23.0819	20.6331												Nervous system disease	Central Nervous system neoplasm	epilepsy	Astrocytoma		Synapse									plasma membrane					cytoplasm	nucleus	2.72593	0.63307	812	0.609375	0.523014	0.78125	0.0324646	0.921875	0.00199405
O00533;O00533-2	Neural cell adhesion molecule L1-like protein;Processed neural cell adhesion molecule L1-like protein	CHL1	+	+	+	31.4612	26.418	23.7591	+	+	+			+						Nervous system disease	Central Nervous system neoplasm	epilepsy	Astrocytoma	Medulloblastoma										plasma membrane							6.01057	1.3227	293	1	2.7307e-05	1	4.30302e-10	0.875	0.00629545
O00560;O00560-3	Syntenin-1	SDCBP	+	+	+	25.2971	25.1911	27.8561												Nervous system disease	Central Nervous system neoplasm	epilepsy	Astrocytoma		Synapse									plasma membrane		endoplasmic reticulum	mitochondrion	Organelli	cytoplasm	nucleus	1.71181	0.36092	1074	0.609375	0.911318	0.921875	0.0087489	0.890625	0.00376188
O00571-2;O00571;O15523-2;O15523;O15523-3	ATP-dependent RNA helicase DDX3X;ATP-dependent RNA helicase DDX3Y	DDX3X;DDX3Y			+	22.1267	23.3832	20.9009												Nervous system disease	Central Nervous system neoplasm		Astrocytoma	Medulloblastoma										plasma membrane					cytoplasm	nucleus	1.60302	0.32681	1115	0.75	0.0805728	0.796875	0.0357207	0.90625	0.00517346
O00584;O00584-2;Q07343-4;Q07343-2;Q07343-3;Q07343	Ribonuclease T2	RNASET2	+		+	27.2825	21.8829	21.7373	+	+	+			+						Nervous system disease	Central Nervous system neoplasm	epilepsy	Astrocytoma	Medulloblastoma	Synapse											endoplasmic reticulum		Organelli	cytoplasm	nucleus	4.61935	1.0346	467	1	1.80583e-05	1	2.19034e-08	0.523438	0.870764
O00592-2;O00592	Podocalyxin	PODXL			+	21.0159	22.4895	22.0904												Nervous system disease	Central Nervous system neoplasm		Astrocytoma											plasma membrane					cytoplasm		0.663238	0.10714	1418	0.765625	0.108646	0.734375	0.0652379	0.5	0.647383
O14498	Immunoglobulin superfamily containing leucine-rich repeat protein	ISLR	+		+	26.3558	22.7942	21.6965	+	+	+			+						Nervous system disease																					4.29217	0.97615	516	0.875	0.0083669	1	4.19354e-06	0.640625	0.343156
O14511-7;O14511-8;O14511-2;O14511;O14511-4;O14511-3;O14511-6;O14511-5	Pro-neuregulin-2, membrane-bound isoform;Neuregulin-2	NRG2		+		21.4655	20.6892	25.7495	+			+		+						Nervous system disease														plasma membrane							3.50439	0.8174	649	0.703125	0.11578	0.921875	0.00124056	0.96875	0.000208267
O14579-3;O14579;O14579-2	Coatomer subunit epsilon	COPE			+	21.3995	22.1775	21.646												Nervous system disease															Golgi	endoplasmic reticulum		Organelli			0.287311	0.047222	1540	0.75	0.176086	0.515625	0.503749	0.703125	0.278079
O14594	Neurocan core protein	NCAN	+	+	+	30.0212	23.8573	25.761	+	+	+			+						Nervous system disease	Central Nervous system neoplasm		Astrocytoma												Golgi			Organelli			3.9062	0.90024	568	1	0.000140967	1	0.000422096	0.71875	0.221172
P47813;O14602	Eukaryotic translation initiation factor 1A, X-chromosomal;Eukaryotic translation initiation factor 1A, Y-chromosomal	EIF1AX;EIF1AY			+	21.455	21.7513	21.1632												Nervous system disease	Central Nervous system neoplasm		Astrocytoma																cytoplasm		0.271733	0.042458	1550	0.75	0.479786	0.5625	0.57863	0.734375	0.134985
O14672;O14672-2	Disintegrin and metalloproteinase domain-containing protein 10	ADAM10			+	21.2772	23.1711	21.2881	+	+				+						Nervous system disease	Central Nervous system neoplasm	epilepsy	Astrocytoma	Medulloblastoma	Synapse						CD156C	M12.210		plasma membrane	Golgi	endoplasmic reticulum		Organelli	cytoplasm	nucleus	5.00408	1.1226	409	0.828125	0.0223869	0.5	0.982602	0.8125	0.0267614
O14745;O14745-2	Na(+)/H(+) exchange regulatory cofactor NHE-RF1	SLC9A3R1		+	+	21.1188	28.8206	25.3925	+	+	+	+	+	+	+					Nervous system disease	Central Nervous system neoplasm		Astrocytoma											plasma membrane					cytoplasm		12.9937	2.7534	14	1	8.91854e-09	1	1.10403e-05	0.984375	4.89399e-05
O14773;O14773-2	Tripeptidyl-peptidase 1	TPP1	+	+	+	26.5696	26.351	26.1375												Nervous system disease	Central Nervous system neoplasm	epilepsy	Astrocytoma									S53.003			Golgi			Organelli			0.0222591	0.0018481	1618	0.734375	0.836186	0.710938	0.695174	0.523438	0.760306
O14786-3;O14786-2;O14786	Neuropilin-1	NRP1	+			25.732	20.5884	21.5693	+	+	+	+	+	+	+					Nervous system disease	Central Nervous system neoplasm	epilepsy	Astrocytoma	Medulloblastoma							CD304			plasma membrane					cytoplasm		10.8756	2.4093	38	1	1.98161e-09	1	4.13862e-08	0.875	0.00624199
O14791;O14791-2;O95236-3;O95236-2;O95236	Apolipoprotein L1	APOL1	+	+	+	25.6412	24.1351	25.8266												Nervous system disease		epilepsy														endoplasmic reticulum		Organelli	cytoplasm		0.927868	0.17841	1316	0.671875	0.319676	0.578125	0.881581	0.625	0.168793
O14793	Growth/differentiation factor 8	MSTN				21.2114	20.5111	20.9916												Nervous system disease	Central Nervous system neoplasm	epilepsy	Astrocytoma																cytoplasm		4.35889	0.99232	502	0.671875	0.139973	0.5	0.542605	0.625	0.1831
O14818;O14818-2;Q8TAA3-2;Q8TAA3-5;Q8TAA3;O14818-4	Proteasome subunit alpha type-7;Proteasome subunit alpha type-7-like	PSMA7;PSMA8	+	+	+	22.2137	27.08	22.7593	+	+				+						Nervous system disease	Central Nervous system neoplasm		Astrocytoma									T01.974;T01.978							cytoplasm	nucleus	2.38007	0.55834	879	0.8125	0.00278452	0.515625	0.726562	0.78125	0.0142521
O14917-2;O14917	Protocadherin-17	PCDH17	+			23.9273	20.8814	21.8285	+	+				+						Nervous system disease	Central Nervous system neoplasm		Astrocytoma		Synapse																2.14379	0.48999	938	0.84375	0.00232972	0.796875	0.0339148	0.75	0.0637492
P19105;O14950	Myosin regulatory light chain 12A;Myosin regulatory light chain 12B	MYL12A;MYL12B	+	+	+	21.5049	26.567	24.3789	+	+	+			+						Nervous system disease	Central Nervous system neoplasm		Astrocytoma																cytoplasm		3.70977	0.86807	606	1	1.50468e-07	0.890625	0.00316326	0.828125	0.0227775
O14980	Exportin-1	XPO1			+	20.9559	23.2532	21.2337	+	+				+						Nervous system disease	Central Nervous system neoplasm		Astrocytoma																cytoplasm	nucleus	1.51235	0.30076	1140	0.875	0.0137413	0.570312	0.649411	0.789062	0.0515788
O15031	Plexin-B2	PLXNB2	+	+	+	26.463	26.6187	23.395	+			+		+						Nervous system disease	Central Nervous system neoplasm		Astrocytoma											plasma membrane							3.43043	0.79412	664	0.585938	0.787129	0.90625	0.00178905	0.90625	0.00360401
O15067	Phosphoribosylformylglycinamidine synthase	PFAS			+	21.7475	21.742	22.4413												Nervous system disease												C56.972							cytoplasm		2.13859	0.48845	940	0.578125	0.993295	0.609375	0.348708	0.640625	0.411363
O15127	Secretory carrier-associated membrane protein 2	SCAMP2		+	+	21.3414	23.9687	22.8632	+	+				+						Nervous system disease	Central Nervous system neoplasm		Astrocytoma												Golgi			Organelli			1.647	0.34153	1096	0.9375	0.000184464	0.8125	0.0534662	0.6875	0.177023
O15143	Actin-related protein 2/3 complex subunit 1B	ARPC1B	+	+	+	22.3724	25.0228	25.7913	+	+	+			+						Nervous system disease	Central Nervous system neoplasm																			nucleus	2.89197	0.66782	776	0.859375	0.00395103	0.9375	0.000456941	0.6875	0.378608
O15144	Actin-related protein 2/3 complex subunit 2	ARPC2	+	+	+	22.8731	25.4379	25.9761												Nervous system disease	Central Nervous system neoplasm		Astrocytoma																	nucleus	3.89974	0.89876	571	0.703125	0.027368	0.796875	0.0124632	0.625	0.377451
O15145	Actin-related protein 2/3 complex subunit 3	ARPC3	+	+	+	22.6079	22.6993	24.1401																																nucleus	0.396822	0.064114	1508	0.53125	0.904446	0.8125	0.0919819	0.78125	0.119409
O15162-2;O15162	Phospholipid scramblase 1	PLSCR1		+	+	21.8597	23.3006	24.0354	+	+	+			+						Nervous system disease														plasma membrane	Golgi			Organelli	cytoplasm	nucleus	3.82028	0.886	584	0.8125	0.0124937	0.890625	0.00494431	0.765625	0.224197
O15204-2;O15204	ADAM DEC1	ADAMDEC1	+		+	24.1525	21.0008	21.3506	+	+	+			+						Nervous system disease												M12.219									4.9433	1.1128	418	0.96875	8.05218e-05	0.96875	0.00022643	0.609375	0.541096
O15230	Laminin subunit alpha-5	LAMA5		+		21.1878	20.8138	30.1524	+			+		+					+	Nervous system disease	Central Nervous system neoplasm	epilepsy	Astrocytoma		Synapse															nucleus	8.94704	1.9849	95	0.671875	0.463045	1	9.70282e-08	1	9.21756e-09
O15240	Neurosecretory protein VGF;Neuroendocrine regulatory peptide-1;Neuroendocrine regulatory peptide-2;Antimicrobial peptide VGF[554-577]	VGF	+		+	30.5787	27.6287	21.0549												Nervous system disease	Central Nervous system neoplasm	epilepsy	Astrocytoma		Synapse										Golgi	endoplasmic reticulum		Organelli	cytoplasm		5.14555	1.1673	387	0.71875	0.0476761	1	3.32219e-12	0.96875	0.000260925
O15335	Chondroadherin	CHAD	+	+	+	22.3325	22.0682	24.1719												Nervous system disease	Central Nervous system neoplasm		Astrocytoma																		1.49723	0.29906	1144	0.5625	0.70944	0.71875	0.0802821	0.765625	0.0603543
O15354	Prosaposin receptor GPR37	GPR37	+		+	25.9822	21.6593	21.3521	+	+	+			+						Nervous system disease	Central Nervous system neoplasm		Astrocytoma	Medulloblastoma										plasma membrane		endoplasmic reticulum		Organelli	cytoplasm		3.59319	0.84281	631	0.984375	2.25033e-05	1	2.6683e-06	0.59375	0.701489
O15372	Eukaryotic translation initiation factor 3 subunit H	EIF3H			+	20.7506	21.8215	21.3348												Nervous system disease	Central Nervous system neoplasm		Astrocytoma									M67.971									1.34185	0.26735	1188	0.75	0.0794492	0.625	0.376246	0.640625	0.379204
O15394;O15394-2	Neural cell adhesion molecule 2	NCAM2	+		+	26.5021	21.0578	21.53	+	+	+			+						Nervous system disease					Synapse									plasma membrane							4.23321	0.95591	525	0.984375	2.51171e-05	0.96875	0.000129708	0.546875	0.516329
O15427	Monocarboxylate transporter 4	SLC16A3		+	+	21.3521	25.0657	22.039	+	+		+		+						Nervous system disease	Central Nervous system neoplasm		Astrocytoma		Synapse									plasma membrane							3.88652	0.89632	575	0.96875	5.08806e-05	0.671875	0.232734	0.9375	0.00058811
O15511;O15511-2	Actin-related protein 2/3 complex subunit 5	ARPC5	+		+	21.3968	22.6663	20.4979												Nervous system disease																			cytoplasm	nucleus	2.20528	0.50401	922	0.710938	0.134336	0.6875	0.1509	0.859375	0.00728139
O15540;O15540-2	Fatty acid-binding protein, brain	FABP7	+	+	+	23.177	25.4356	23.7692												Nervous system disease	Central Nervous system neoplasm	epilepsy	Astrocytoma																	nucleus	0.39492	0.063442	1510	0.75	0.106195	0.578125	0.661572	0.671875	0.252916
O43169	Cytochrome b5 type B	CYB5B			+	21.2619	24.2946	20.9954	+	+		+		+					+																						7.21229	1.6019	185	1	1.08694e-05	0.625	0.506267	1	3.21966e-06
O43242;O43242-2	26S proteasome non-ATPase regulatory subunit 3	PSMD3		+	+	21.5329	23.2539	22.0585												Nervous system disease	Central Nervous system neoplasm			Medulloblastoma																nucleus	2.85243	0.66101	783	0.921875	0.0317874	0.609375	0.340979	0.71875	0.138772
O43396	Thioredoxin-like protein 1	TXNL1			+	21.353	22.7972	21.2665												Nervous system disease	Central Nervous system neoplasm		Astrocytoma																cytoplasm	nucleus	0.914428	0.17623	1320	0.796875	0.0349504	0.515625	0.837775	0.8125	0.0249136
O43399-6;O43399-2;O43399-4;O43399;O43399-3;O43399-5;O43399-7	Tumor protein D54	TPD52L2				21.2433	20.951	21.3339												Nervous system disease	Central Nervous system neoplasm		Astrocytoma																cytoplasm		7.03958	1.5689	196	0.507812	0.556522	0.546875	0.864433	0.5	0.489851
O43490-2;O43490;O43490-5;O43490-3;O43490-4;O43490-6;O43490-7	Prominin-1	PROM1		+	+	20.838	25.3864	26.323	+	+	+			+						Nervous system disease	Central Nervous system neoplasm	epilepsy	Astrocytoma	Medulloblastoma							CD133			plasma membrane	Golgi	endoplasmic reticulum		Organelli			5.18669	1.175	380	0.984375	0.00109647	1	2.16637e-06	0.671875	0.469437
O43491-4	Band 4.1-like protein 2	EPB41L2		+	+	20.9532	26.8084	23.7544	+	+	+	+	+	+	+					Nervous system disease	Central Nervous system neoplasm													plasma membrane							12.487	2.6113	21	1	6.90282e-09	0.992188	0.000482369	0.921875	0.00029236
O43493;O43493-5;O43493-3;O43493-7;O43493-4;O43493-6	Trans-Golgi network integral membrane protein 2	TGOLN2	+			22.8557	20.3282	21.5256	+	+				+						Nervous system disease														plasma membrane	Golgi	endoplasmic reticulum		Organelli			2.26311	0.53009	905	0.96875	0.000276217	0.828125	0.0424024	0.796875	0.0710544
O43504	Ragulator complex protein LAMTOR5	LAMTOR5			+	21.0354	22.5446	21.332												Nervous system disease	Central Nervous system neoplasm																				0.578939	0.094846	1445	0.734375	0.0549985	0.65625	0.547783	0.71875	0.0948124
O43505	Beta-1,4-glucuronyltransferase 1	B4GAT1	+	+	+	31.264	24.8222	25.7908	+	+	+			+						Nervous system disease	Central Nervous system neoplasm		Astrocytoma												Golgi			Organelli			4.0189	0.92579	551	1	3.6778e-05	1	2.83362e-06	0.65625	0.459522
O43508-2;O75888-5;O75888-4;O75888;O75888-2;O75888-3	Tumor necrosis factor ligand superfamily member 13	TNFSF13		+	+	21.5678	22.8013	21.8492												Nervous system disease	Central Nervous system neoplasm	epilepsy	Astrocytoma								CD256			plasma membrane					cytoplasm		2.07717	0.47194	952	0.726562	0.0312103	0.5625	0.686824	0.75	0.0897824
O43513	Mediator of RNA polymerase II transcription subunit 7	MED7	+	+	+	22.2114	21.4658	22.3656																																nucleus	1.6455	0.34078	1098	0.703125	0.484121	0.609375	0.881626	0.65625	0.504404
O43529	Carbohydrate sulfotransferase 10	CHST10	+			23.585	20.7684	21.5652	+	+	+			+						Nervous system disease					Synapse										Golgi			Organelli			3.47875	0.80388	657	0.96875	6.32439e-05	0.90625	0.00261117	0.71875	0.0985707
O43556-4;O43556;O43556-3	Epsilon-sarcoglycan	SGCE	+			24.7592	20.9599	22.0394	+	+	+			+						Nervous system disease		epilepsy												plasma membrane	Golgi			Organelli			4.95632	1.1201	415	1	2.13883e-11	1	0.000121495	0.75	0.0527303
O43598;O43598-2	2-deoxynucleoside 5-phosphate N-hydrolase 1	DNPH1	+		+	21.8914	25.1229	21.2568	+	+		+		+																										nucleus	2.7878	0.6406	803	0.953125	0.000984133	0.671875	0.226695	1	5.65151e-05
O43707;O43707-2;O43707-3	Alpha-actinin-4	ACTN4		+	+	20.7943	28.2133	24.3046	+	+	+			+						Nervous system disease	Central Nervous system neoplasm		Astrocytoma											plasma membrane					cytoplasm	nucleus	6.54186	1.4443	241	1	2.5693e-07	0.953125	5.54928e-05	0.984375	0.000488402
O43760;O43760-2	Synaptogyrin-2	SYNGR2		+	+	21.703	22.7348	21.9875																	Synapse																1.768	0.3761	1053	0.75	0.087414	0.578125	0.634776	0.648438	0.206476
O43765	Small glutamine-rich tetratricopeptide repeat-containing protein alpha	SGTA			+	21.3217	23.0831	21.5234	+	+				+						Nervous system disease	Central Nervous system neoplasm		Astrocytoma		Synapse														cytoplasm	nucleus	1.92585	0.42553	995	0.90625	0.00421447	0.546875	0.6954	0.8125	0.016517
O43852;O43852-3;O43852-2;O43852-4;O43852-5;O43852-9;O43852-15;O43852-10;O43852-6;O43852-13;O43852-14;O43852-11;O43852-12;O43852-7;O43852-8	Calumenin	CALU	+		+	21.8304	22.538	21.0679												Nervous system disease	Central Nervous system neoplasm		Astrocytoma												Golgi	endoplasmic reticulum		Organelli			1.7215	0.36203	1070	0.59375	0.320064	0.671875	0.258019	0.84375	0.0488402
O43854-2;O43854	EGF-like repeat and discoidin I-like domain-containing protein 3	EDIL3			+	20.9523	23.5762	21.333	+	+				+						Nervous system disease	Central Nervous system neoplasm		Astrocytoma																		1.99591	0.44284	976	0.828125	0.0100639	0.625	0.33708	0.859375	0.0208924
O43865;O43865-2;Q96HN2-4;Q96HN2-3;Q96HN2-2;Q96HN2	Putative adenosylhomocysteinase 2;Putative adenosylhomocysteinase 3	AHCYL1;AHCYL2		+	+	21.2809	23.667	23.4935	+	+	+			+						Nervous system disease	Central Nervous system neoplasm	epilepsy	Astrocytoma											plasma membrane		endoplasmic reticulum		Organelli	cytoplasm		1.93605	0.42648	992	1	0.00188296	0.890625	0.00124595	0.6875	0.825002
O43866	CD5 antigen-like	CD5L		+	+	21.7516	22.3342	25.6745	+			+		+						Nervous system disease														plasma membrane					cytoplasm		3.06327	0.70619	746	0.546875	0.499511	0.96875	7.05192e-05	0.890625	0.00223296
O60241-4;O60241-3;O60241-2;O60241	Brain-specific angiogenesis inhibitor 2	BAI2	+			24.5722	20.6929	21.2386	+	+	+			+						Nervous system disease	Central Nervous system neoplasm		Astrocytoma									P02.029		plasma membrane							4.56627	1.0218	477	1	1.98258e-09	1	1.24554e-05	0.671875	0.27942
O60256;O60256-3;O60256-4;O60256-2	Phosphoribosyl pyrophosphate synthase-associated protein 2	PRPSAP2			+	21.4061	23.1153	21.5733												Nervous system disease	Central Nervous system neoplasm																		cytoplasm		1.15112	0.22312	1246	0.8125	0.0364189	0.546875	0.714382	0.75	0.0622019
O60262	Guanine nucleotide-binding protein G(I)/G(S)/G(O) subunit gamma-7	GNG7		+	+	21.2067	22.4502	21.5055	+	+				+						Nervous system disease	Central Nervous system neoplasm			Medulloblastoma	Synapse	Synaptosome	GABAergic synapse	Cholinergic synapse	Serotonergic synapse	Glutamatergic synapse				plasma membrane							0.944705	0.18429	1312	0.84375	0.0198198	0.578125	0.580547	0.703125	0.152208
O60279	Sushi domain-containing protein 5	SUSD5	+	+	+	23.2912	22.331	21.5868													Central Nervous system neoplasm		Astrocytoma																		1.49221	0.29607	1150	0.65625	0.273188	0.796875	0.0668394	0.671875	0.401176
O60462-4;O60462-5;O60462-2;O60462-3;O60462;O60462-6	Neuropilin-2	NRP2	+			24.4547	20.9647	21.6786	+	+	+			+						Nervous system disease	Central Nervous system neoplasm	epilepsy	Astrocytoma	Medulloblastoma	Synapse									plasma membrane							3.39144	0.78595	670	1	2.2555e-06	0.90625	0.00111892	0.671875	0.313929
O60488-2;O60488	Long-chain-fatty-acid--CoA ligase 4	ACSL4			+	21.2447	22.1915	21.3611												Nervous system disease	Central Nervous system neoplasm													plasma membrane		endoplasmic reticulum		Organelli	cytoplasm		0.326214	0.052042	1532	0.671875	0.147753	0.53125	0.816084	0.65625	0.22069
O60610-2;O60610-3;O60610	Protein diaphanous homolog 1	DIAPH1			+	21.0889	23.075	21.964	+	+				+						Nervous system disease	Central Nervous system neoplasm	epilepsy	Astrocytoma											plasma membrane					cytoplasm	nucleus	1.29088	0.25675	1200	0.84375	0.014385	0.8125	0.0498476	0.671875	0.161114
O60716;O60716-17;O60716-2;O60716-4;O60716-6;O60716-3;O60716-5;O60716-7;O60716-9;O60716-8;O60716-10;O60716-12;O60716-14;O60716-11;O60716-13;O60716-15;O60716-18;O60716-16;O60716-20;O60716-22;O60716-19;O60716-21;O60716-23;O60716-24;O60716-31;O60716-25;O60716-26;O60716-28;O60716-30;O60716-27;O60716-29;O60716-32	Catenin delta-1	CTNND1			+	21.3316	22.1607	21.1879												Nervous system disease	Central Nervous system neoplasm		Astrocytoma		Synapse									plasma membrane					cytoplasm	nucleus	0.818708	0.14797	1355	0.734375	0.136592	0.578125	0.650264	0.75	0.0751155
O60763;O60763-2	General vesicular transport factor p115	USO1			+	21.0701	22.2486	21.6355												Nervous system disease															Golgi	endoplasmic reticulum		Organelli	cytoplasm		0.492049	0.080515	1477	0.78125	0.0792684	0.640625	0.312806	0.59375	0.282564
O60883	Prosaposin receptor GPR37L1	GPR37L1	+			26.2697	21.0094	21.4826	+	+	+			+						Nervous system disease	Central Nervous system neoplasm		Astrocytoma	Medulloblastoma										plasma membrane							6.8264	1.5192	216	0.953125	1.38875e-05	0.90625	5.4739e-05	0.71875	0.170435
O60888-3;O60888;O60888-2	Protein CutA	CUTA	+		+	28.2848	26.227	21.5448	+	+	+	+	+	+	+				+	Nervous system disease																					11.0373	2.4206	36	0.953125	0.003903	1	4.79549e-11	1	2.60485e-06
O60928;O60928-2	Inward rectifier potassium channel 13	KCNJ13		+	+	20.9331	24.4015	24.6195	+	+	+			+						Nervous system disease														plasma membrane							4.34043	0.98614	507	0.921875	0.00126616	0.9375	0.000616422	0.523438	0.840871
O75071	EF-hand calcium-binding domain-containing protein 14	EFCAB14	+			24.4683	20.9075	21.7776	+	+	+			+																											5.02505	1.1277	405	0.9375	3.97168e-05	0.890625	0.00128736	0.796875	0.054996
O75083;O75083-3	WD repeat-containing protein 1	WDR1		+	+	21.1116	28.551	27.2732	+	+	+			+						Nervous system disease	Central Nervous system neoplasm		Astrocytoma											plasma membrane							6.99752	1.566	199	1	9.81765e-08	1	1.02721e-07	0.75	0.0916726
O75131;Q86YQ8-2;Q9HCH3-2;Q8IYJ1;Q96A23;O95741;Q9UBL6-2;Q96A23-2;Q9HCH3;O95741-2;Q9UBL6	Copine-3	CPNE3		+	+	21.7159	26.4778	24.1845	+	+				+						Nervous system disease	Central Nervous system neoplasm		Astrocytoma	Medulloblastoma	Synapse									plasma membrane			mitochondrion	Organelli	cytoplasm	nucleus	5.415	1.2143	357	1	1.97876e-07	0.765625	0.0297417	0.75	0.0363385
O75144-2;O75144;O75144-3	ICOS ligand	ICOSLG	+			25.4744	20.7921	21.5562	+	+	+			+			+			Nervous system disease	Central Nervous system neoplasm	epilepsy	Astrocytoma								CD275			plasma membrane					cytoplasm		6.03406	1.3265	290	1	1.09845e-12	1	4.51847e-07	0.75	0.0910519
O75173;O75173-2	A disintegrin and metalloproteinase with thrombospondin motifs 4	ADAMTS4	+		+	24.397	22.4778	21.2195												Nervous system disease	Central Nervous system neoplasm		Astrocytoma									M12.221									1.94401	0.42838	987	0.765625	0.0771284	0.859375	0.00306415	0.6875	0.119555
O75326;O75326-2	Semaphorin-7A	SEMA7A	+		+	28.1507	22.6741	20.9483	+	+	+			+						Nervous system disease	Central Nervous system neoplasm										CD108			plasma membrane							7.84379	1.6959	149	1	8.76407e-06	1	3.55086e-09	0.796875	0.0303842
O75340;O75340-2;O75340-3	Programmed cell death protein 6	PDCD6	+	+	+	21.1255	27.7407	28.0497	+	+	+			+						Nervous system disease	Central Nervous system neoplasm		Astrocytoma													endoplasmic reticulum		Organelli	cytoplasm	nucleus	9.09482	2.0002	89	1	1.28751e-08	1	9.63463e-10	0.578125	0.394814
O75351	Vacuolar protein sorting-associated protein 4B	VPS4B		+	+	21.0777	22.2259	23.4002												Nervous system disease														plasma membrane					cytoplasm	nucleus	1.88135	0.41143	1014	0.796875	0.0364022	0.9375	0.00199986	0.765625	0.0423348
O75367;O75367-3;O75367-2	Core histone macro-H2A.1	H2AFY		+	+	21.532	21.2366	27.7866	+			+		+						Nervous system disease																				nucleus	8.0586	1.749	137	0.53125	0.465515	1	8.93138e-07	1	1.17854e-07
O75368	SH3 domain-binding glutamic acid-rich-like protein	SH3BGRL	+		+	25.3809	23.1721	21.125	+	+	+			+																				plasma membrane					cytoplasm	nucleus	5.94349	1.3132	301	0.890625	0.00102579	1	3.19418e-06	0.84375	0.0102073
O75487;O75487-2	Glypican-4;Secreted glypican-4	GPC4			+	20.7982	22.1439	21.5413												Nervous system disease					Synapse									plasma membrane	Golgi			Organelli		nucleus	4.67205	1.0639	455	0.8125	0.0435835	0.75	0.0865424	0.609375	0.311289
O75493	Carbonic anhydrase-related protein 11	CA11	+			23.255	20.7859	20.7784	+	+	+			+						Nervous system disease	Central Nervous system neoplasm		Astrocytoma	Medulloblastoma										plasma membrane							2.20007	0.50256	924	0.875	0.00410798	0.875	0.0101516	0.515625	0.989127
O75503	Ceroid-lipofuscinosis neuronal protein 5	CLN5	+	+		24.2565	20.7417	21.9764	+	+	+			+						Nervous system disease		epilepsy													Golgi	endoplasmic reticulum		Organelli	cytoplasm		6.03934	1.3307	288	0.953125	2.43333e-05	0.90625	0.00381401	0.796875	0.0356355
O75531;Q5JUR7	Barrier-to-autointegration factor;Barrier-to-autointegration factor, N-terminally processed	BANF1		+	+	21.014	21.3979	29.747	+			+		+					+	Nervous system disease	Central Nervous system neoplasm		Astrocytoma																cytoplasm	nucleus	8.71514	1.9574	103	0.515625	0.623408	1	3.14845e-11	1	1.16704e-08
O75636-2;O75636	Ficolin-3	FCN3	+	+		23.1724	21.0004	22.4271												Nervous system disease	Central Nervous system neoplasm	epilepsy												plasma membrane							0.810915	0.14588	1357	0.75	0.0323877	0.59375	0.520918	0.765625	0.062731
O75695	Protein XRP2	RP2		+	+	21.4573	24.5253	23.5031	+	+	+			+						Nervous system disease	Central Nervous system neoplasm		Astrocytoma											plasma membrane	Golgi			Organelli	cytoplasm		2.98941	0.6803	766	0.984375	1.53492e-05	0.859375	0.00629353	0.734375	0.103506
O75711	Scrapie-responsive protein 1	SCRG1	+	+	+	27.2677	23.3125	25.8054	+	+				+						Nervous system disease	Central Nervous system neoplasm			Medulloblastoma											Golgi			Organelli			3.03118	0.69541	754	0.953125	0.00037142	0.765625	0.0440975	0.8125	0.0303087
O75781-2;O75781	Paralemmin-1	PALM	+		+	22.8135	23.2398	20.652	+			+		+						Nervous system disease					Synapse									plasma membrane					cytoplasm		1.88947	0.4154	1010	0.59375	0.684095	0.875	0.0182727	0.859375	0.00496509
O75787-2;O75787	Renin receptor	ATP6AP2	+	+	+	27.0943	26.3601	28.1623												Nervous system disease	Central Nervous system neoplasm	epilepsy	Astrocytoma		Synapse									plasma membrane		endoplasmic reticulum		Organelli			0.282948	0.046424	1544	0.625	0.480456	0.78125	0.0144419	0.65625	0.110856
O75828	Carbonyl reductase [NADPH] 3	CBR3		+	+	20.8292	22.7671	24.9905												Nervous system disease																					3.24949	0.74939	707	0.75	0.0417302	0.90625	2.94943e-05	0.75	0.0523056
O75832;O75832-2	26S proteasome non-ATPase regulatory subunit 10	PSMD10			+	20.7111	23.5042	21.843	+	+				+						Nervous system disease														plasma membrane					cytoplasm	nucleus	1.9582	0.43509	984	0.890625	0.00765257	0.75	0.055868	0.75	0.104135
O75874	Isocitrate dehydrogenase [NADP] cytoplasmic	IDH1	+	+	+	24.0224	25.3486	26.7496	+			+		+						Nervous system disease	Central Nervous system neoplasm	epilepsy	Astrocytoma	Medulloblastoma													mitochondrion	Organelli	cytoplasm		2.89969	0.67111	775	0.796875	0.0717896	0.890625	0.00151586	0.84375	0.00840293
O75882-3;O75882-2;O75882	Attractin	ATRN	+			26.6597	20.9843	21.6319	+	+	+			+						Nervous system disease	Central Nervous system neoplasm	epilepsy	Astrocytoma											plasma membrane	Golgi			Organelli			4.93375	1.1118	419	1	4.3068e-11	1	2.46353e-07	0.734375	0.225834
O75954	Tetraspanin-9	TSPAN9		+	+	21.78	22.3478	23.7148												Nervous system disease														plasma membrane							0.835871	0.154	1348	0.578125	0.469956	0.742188	0.0319731	0.71875	0.187625
O75955;O75955-2	Flotillin-1	FLOT1		+	+	21.5001	26.9032	24.9521	+	+	+			+						Nervous system disease					Synapse									plasma membrane					cytoplasm		4.44418	1.0088	491	1	2.52556e-06	0.890625	0.001495	0.726562	0.0752414
O75970-5;O75970-3;O75970-2;O75970	Multiple PDZ domain protein	MPDZ		+	+	21.7921	23.816	23.0042	+	+				+						Nervous system disease					Synapse									plasma membrane					cytoplasm		1.86268	0.40539	1021	0.90625	0.00423902	0.625	0.20832	0.609375	0.402376
O94760	N(G),N(G)-dimethylarginine dimethylaminohydrolase 1	DDAH1	+	+	+	24.1895	23.2109	21.8958												Nervous system disease	Central Nervous system neoplasm																				2.52991	0.59103	847	0.6875	0.313642	0.9375	0.00450058	0.625	0.256835
O94769;O94769-2;Q8N3V7-2	Extracellular matrix protein 2	ECM2	+	+	+	24.9031	26.5921	27.0473												Nervous system disease	Central Nervous system neoplasm		Astrocytoma	Medulloblastoma										plasma membrane						nucleus	0.250237	0.033159	1564	0.765625	0.320989	0.671875	0.152625	0.539062	0.818632
O94772;O94772-2	Lymphocyte antigen 6H	LY6H	+	+	+	27.5021	27.2852	24.5583												Nervous system disease	Central Nervous system neoplasm		Astrocytoma	Medulloblastoma										plasma membrane							2.15937	0.49582	930	0.617188	0.763243	0.882812	0.00658251	0.828125	0.0240377
O94804	Serine/threonine-protein kinase 10	STK10			+	20.8429	21.9221	21.0946												Nervous system disease													STK10	plasma membrane					cytoplasm		1.19163	0.23436	1235	0.796875	0.0271487	0.5625	0.598247	0.8125	0.0417245
O94856-11;O94856-6;O94856-7;O94856-13;O94856;O94856-10;O94856-3;O94856-8;O94856-5;O94856-2	Neurofascin	NFASC	+	+		26.1402	20.6607	23.1283	+	+	+	+	+	+	+					Nervous system disease	Central Nervous system neoplasm	epilepsy	Astrocytoma											plasma membrane							12.2332	2.5904	25	1	6.13399e-09	0.90625	0.00318214	0.8125	0.00918456
O94910-2;O94910	Latrophilin-1	LPHN1	+			23.5577	20.5636	20.9294	+	+	+			+						Nervous system disease					Synapse							P02.010		plasma membrane							3.33801	0.77653	682	1	4.11887e-07	1	1.27257e-06	0.679688	0.353438
O94919	Endonuclease domain-containing 1 protein	ENDOD1	+		+	25.2016	22.2867	21.2042	+	+	+			+						Nervous system disease	Central Nervous system neoplasm			Medulloblastoma																	4.48449	1.0161	484	0.9375	0.00165939	0.96875	5.51377e-05	0.71875	0.106105
O94933	SLIT and NTRK-like protein 3	SLITRK3	+			23.6602	20.5152	21.3252	+	+	+			+							Central Nervous system neoplasm			Medulloblastoma	Synapse									plasma membrane							3.33418	0.77457	684	1	0.000137161	0.921875	0.0030217	0.796875	0.0593752
O94985-2;O94985	Calsyntenin-1;Soluble Alc-alpha;CTF1-alpha	CLSTN1	+	+	+	30.9752	26.8139	28.224	+	+	+			+						Nervous system disease	Central Nervous system neoplasm	epilepsy	Astrocytoma		Synapse										Golgi	endoplasmic reticulum		Organelli		nucleus	4.15425	0.94992	532	1	1.42555e-05	1	1.31702e-05	0.734375	0.0804971
O95168-2;O95168	NADH dehydrogenase [ubiquinone] 1 beta subcomplex subunit 4	NDUFB4				21.8196	20.9056	20.6136												Nervous system disease	Central Nervous system neoplasm		Astrocytoma														mitochondrion	Organelli			4.63701	1.0386	466	0.71875	0.103879	0.78125	0.036929	0.648438	0.345992
O95196-2;O95196-3;O95196	Chondroitin sulfate proteoglycan 5	CSPG5	+			26.213	20.5483	21.2124	+	+	+			+						Nervous system disease					Synapse									plasma membrane	Golgi	endoplasmic reticulum		Organelli			6.35365	1.3955	262	1	4.00511e-07	1	3.38492e-06	0.6875	0.140093
O95197-3;O95197-4;O95197-7;O95197-2;O95197;O95197-6;O95197-5	Reticulon-3	RTN3		+	+	21.1615	25.1294	22.8733	+	+	+	+	+	+	+					Nervous system disease	Central Nervous system neoplasm		Astrocytoma											plasma membrane	Golgi	endoplasmic reticulum		Organelli			10.0607	2.1744	60	1	3.57358e-07	0.890625	0.0171784	0.90625	0.00564471
O95336	6-phosphogluconolactonase	PGLS	+		+	23.5567	22.2044	21.6853												Nervous system disease	Central Nervous system neoplasm		Astrocytoma																		1.05152	0.20643	1272	0.71875	0.141798	0.984375	5.71407e-05	0.5625	0.563293
O95372	Acyl-protein thioesterase 2	LYPLA2		+	+	21.8066	22.7799	24.2507																								S09.025			Golgi			Organelli	cytoplasm		0.946422	0.18647	1308	0.703125	0.306821	0.78125	0.0178321	0.640625	0.248978
O95373	Importin-7	IPO7	+	+	+	20.657	23.2339	22.3057	+	+				+						Nervous system disease	Central Nervous system neoplasm		Astrocytoma																		0.744251	0.12573	1385	0.914062	0.0100943	0.703125	0.131583	0.703125	0.471443
O95394;O95394-3;O95394-4	Phosphoacetylglucosamine mutase	PGM3			+	21.2443	21.108	22.2306												Nervous system disease																					0.480414	0.079085	1481	0.53125	0.743465	0.609375	0.215284	0.59375	0.153564
O95428-6;O95428-5;O95428;O95428-4;O95428-2	Papilin	PAPLN	+	+		23.837	20.9572	25.08	+	+		+		+							Central Nervous system neoplasm		Astrocytoma									I02.972									3.3164	0.7719	689	0.953125	2.61636e-05	0.65625	0.250747	0.953125	0.000792798
O95445	Apolipoprotein M	APOM	+	+	+	26.7069	27.5861	27.7262												Nervous system disease																					1.20623	0.23525	1232	0.625	0.45533	0.578125	0.370087	0.515625	0.901007
O95502	Neuronal pentraxin receptor	NPTXR	+	+	+	28.9783	23.2001	22.7611	+	+	+			+						Nervous system disease	Central Nervous system neoplasm		Astrocytoma		Synapse																3.87341	0.89146	578	0.96875	0.000135799	1	2.94074e-06	0.53125	0.735404
O95631	Netrin-1	NTN1		+		21.1034	20.4436	25.2098	+			+		+						Nervous system disease	Central Nervous system neoplasm	epilepsy	Astrocytoma	Medulloblastoma																	5.49553	1.2392	346	0.71875	0.196691	0.953125	5.86208e-05	0.96875	1.34265e-05
O95671-3;O95671-2;O95671	N-acetylserotonin O-methyltransferase-like protein	ASMTL				21.3865	20.7769	21.6925													Central Nervous system neoplasm		Astrocytoma																		4.53142	1.02	479	0.765625	0.103459	0.59375	0.463444	0.796875	0.026267
O95711	Lymphocyte antigen 86	LY86				21.4232	20.7925	21.7437												Nervous system disease	Central Nervous system neoplasm	epilepsy	Astrocytoma																		7.25644	1.6057	183	0.75	0.0694577	0.609375	0.42141	0.828125	0.0239181
O95782-2;O95782	AP-2 complex subunit alpha-1	AP2A1	+	+	+	21.4031	23.2245	22.4209												Nervous system disease	Central Nervous system neoplasm			Medulloblastoma										plasma membrane	Golgi			Organelli	cytoplasm		0.672014	0.11006	1413	0.875	0.0329102	0.71875	0.192805	0.640625	0.378676
O95810	Serum deprivation-response protein	SDPR			+	21.4104	22.3857	22.0356												Nervous system disease	Central Nervous system neoplasm													plasma membrane					cytoplasm		0.15862	0.018637	1590	0.640625	0.202882	0.609375	0.297894	0.546875	0.650016
O95865	N(G),N(G)-dimethylarginine dimethylaminohydrolase 2	DDAH2			+	20.655	23.3594	21.811	+	+	+			+						Nervous system disease	Central Nervous system neoplasm			Medulloblastoma													mitochondrion	Organelli			3.16863	0.73098	724	0.984375	0.00181001	0.90625	0.00690582	0.773438	0.0626487
O95967	EGF-containing fibulin-like extracellular matrix protein 2	EFEMP2	+	+	+	24.9489	22.8389	24.2863	+	+				+						Nervous system disease	Central Nervous system neoplasm		Astrocytoma																		5.35093	1.2023	365	0.953125	0.000362804	0.5625	0.309454	0.828125	0.037255
O95976	Immunoglobulin superfamily member 6	IGSF6		+	+	21.5239	20.6916	24.2265	+			+		+						Nervous system disease	Central Nervous system neoplasm		Astrocytoma											plasma membrane							4.20425	0.95314	529	0.71875	0.0938383	0.875	0.00325483	0.90625	0.000984598
O96000;O96000-2	NADH dehydrogenase [ubiquinone] 1 beta subcomplex subunit 10	NDUFB10			+	21.6188	21.8517	22.0291												Nervous system disease	Central Nervous system neoplasm		Astrocytoma																		0.022061	0.0017731	1619	0.640625	0.724163	0.578125	0.568879	0.5	0.809113
P00338;P00338-3;P00338-4;P00338-5;P00338-2	L-lactate dehydrogenase A chain	LDHA	+	+	+	28.2984	28.0673	29.425												Nervous system disease	Central Nervous system neoplasm	epilepsy	Astrocytoma	Medulloblastoma													mitochondrion	Organelli		nucleus	0.676663	0.11082	1411	0.59375	0.698518	0.75	0.131628	0.75	0.0685088
P00352;P47895	Retinal dehydrogenase 1	ALDH1A1	+	+	+	22.0087	24.3484	23.7921												Nervous system disease	Central Nervous system neoplasm		Astrocytoma	Medulloblastoma															cytoplasm		0.42881	0.068472	1499	0.71875	0.181437	0.703125	0.215763	0.515625	0.731551
P00367;P00367-3;P00367-2;P49448	Glutamate dehydrogenase 1, mitochondrial;Glutamate dehydrogenase 2, mitochondrial	GLUD1;GLUD2			+	21.6791	23.155	21.2312												Nervous system disease	Central Nervous system neoplasm	epilepsy	Astrocytoma													endoplasmic reticulum	mitochondrion	Organelli	cytoplasm		1.52127	0.30576	1136	0.71875	0.0594277	0.671875	0.389704	0.8125	0.0295904
P00387-2;P00387;P00387-3	NADH-cytochrome b5 reductase 3;NADH-cytochrome b5 reductase 3 membrane-bound form;NADH-cytochrome b5 reductase 3 soluble form	CYB5R3			+	21.8706	24.0984	20.8483	+	+		+		+						Nervous system disease	Central Nervous system neoplasm	epilepsy	Astrocytoma													endoplasmic reticulum	mitochondrion	Organelli	cytoplasm		3.6964	0.86428	609	0.8125	0.0180197	0.8125	0.0373822	0.96875	0.0011295
P00390-2;P00390;P00390-3;P00390-4;P00390-5	Glutathione reductase, mitochondrial	GSR	+		+	25.5772	24.2138	20.8773												Nervous system disease	Central Nervous system neoplasm	epilepsy	Astrocytoma	Medulloblastoma										plasma membrane			mitochondrion	Organelli			3.85379	0.88854	582	0.8125	0.0774816	1	1.32951e-06	1	2.34297e-05
P00441	Superoxide dismutase [Cu-Zn]	SOD1	+	+	+	30.0377	29.069	26.6873												Nervous system disease	Central Nervous system neoplasm	epilepsy	Astrocytoma														mitochondrion	Organelli	cytoplasm	nucleus	6.03481	1.3298	289	0.726562	0.0783777	1	1.32671e-05	0.953125	0.00080612
P00450	Ceruloplasmin	CP	+	+	+	33.6006	30.7521	31.5336	+	+	+			+						Nervous system disease	Central Nervous system neoplasm	epilepsy	Astrocytoma											plasma membrane		endoplasmic reticulum		Organelli			4.30703	0.97985	513	1	3.7619e-05	1	8.84429e-06	0.710938	0.175026
P00488	Coagulation factor XIII A chain	F13A1	+	+	+	22.8406	27.0037	30.0864	+	+	+	+	+	+	+					Nervous system disease	Central Nervous system neoplasm	epilepsy	Astrocytoma																		10.0223	2.1737	62	0.953125	0.00167499	1	4.74126e-07	0.890625	0.0034089
P00491	Purine nucleoside phosphorylase	PNP	+	+	+	23.9833	25.7725	25.6468												Nervous system disease	Central Nervous system neoplasm		Astrocytoma																cytoplasm	nucleus	0.794806	0.13818	1370	0.6875	0.291043	0.625	0.32253	0.53125	0.934055
P00492	Hypoxanthine-guanine phosphoribosyltransferase	HPRT1	+	+	+	24.4748	23.6066	24.1013												Nervous system disease	Central Nervous system neoplasm	epilepsy	Astrocytoma	Medulloblastoma															cytoplasm		1.08497	0.21423	1260	0.6875	0.389412	0.515625	0.744743	0.5625	0.667699
P00558	Phosphoglycerate kinase 1	PGK1	+	+	+	27.6435	30.1029	29.4883	+	+	+			+						Nervous system disease	Central Nervous system neoplasm	epilepsy	Astrocytoma																		1.49453	0.29704	1146	0.929688	0.00185354	0.828125	0.0199057	0.609375	0.443043
P00568;Q9Y6K8-2	Adenylate kinase isoenzyme 1	AK1	+	+	+	26.2991	29.6074	27.6168	+	+				+						Nervous system disease	Central Nervous system neoplasm		Astrocytoma	Medulloblastoma															cytoplasm		2.66755	0.61969	822	0.9375	0.00133898	0.734375	0.0890737	0.796875	0.0285117
P00734;CON__P00735	Prothrombin;Activation peptide fragment 1;Activation peptide fragment 2;Thrombin light chain;Thrombin heavy chain	F2	+	+	+	29.6634	30.5771	31.1925												Nervous system disease	Central Nervous system neoplasm	epilepsy	Astrocytoma									S01.217		plasma membrane	Golgi	endoplasmic reticulum		Organelli			2.43607	0.57032	867	0.8125	0.188645	0.796875	0.0103053	0.625	0.416041
P00736	Complement C1r subcomponent;Complement C1r subcomponent heavy chain;Complement C1r subcomponent light chain	C1R	+	+	+	31.3402	26.4152	34.5445	+	+	+	+	+	+	+					Nervous system disease	Central Nervous system neoplasm	epilepsy	Astrocytoma									S01.192									10.0386	2.1741	61	0.984375	0.00129827	1	3.20429e-06	1	1.93331e-05
P00738;P00738-2	Haptoglobin;Haptoglobin alpha chain;Haptoglobin beta chain	HP	+	+	+	32.5514	28.2571	28.1843	+	+	+			+						Nervous system disease	Central Nervous system neoplasm	epilepsy	Astrocytoma									S01.972									4.38248	0.99421	501	0.96875	0.000262876	1	9.26477e-06	0.59375	0.932206
P00739;P00739-2	Haptoglobin-related protein	HPR	+	+	+	25.7336	21.3584	21.6518	+	+	+			+						Nervous system disease	Central Nervous system neoplasm	epilepsy	Astrocytoma	Medulloblastoma								S01.974									5.06035	1.1415	399	0.921875	0.000832546	0.9375	0.000529427	0.546875	0.760199
P00740-2;P00740	Coagulation factor IX;Coagulation factor IXa light chain;Coagulation factor IXa heavy chain	F9	+	+	+	23.9582	25.2148	23.596												Nervous system disease	Central Nervous system neoplasm	epilepsy	Astrocytoma									S01.214		plasma membrane	Golgi	endoplasmic reticulum		Organelli			0.665728	0.10724	1417	0.578125	0.407401	0.59375	0.789157	0.625	0.391274
P00742	Coagulation factor X;Factor X light chain;Factor X heavy chain;Activated factor Xa heavy chain	F10	+	+	+	25.0509	26.612	25.2801												Nervous system disease	Central Nervous system neoplasm	epilepsy	Astrocytoma									S01.216		plasma membrane	Golgi	endoplasmic reticulum		Organelli			0.778716	0.12995	1377	0.625	0.276386	0.53125	0.849003	0.609375	0.430703
P00746	Complement factor D	CFD	+	+	+	27.7058	22.7525	24.9182	+	+	+	+	+	+	+					Nervous system disease	Central Nervous system neoplasm		Astrocytoma									S01.191									9.89774	2.1304	68	1	2.01872e-06	0.984375	8.68183e-05	0.8125	0.0116054
P00747;Q15195;Q02325	Plasminogen;Plasmin heavy chain A;Activation peptide;Angiostatin;Plasmin heavy chain A, short form;Plasmin light chain B	PLG	+	+	+	30.086	28.9341	33.244												Nervous system disease	Central Nervous system neoplasm	epilepsy	Astrocytoma									S01.233		plasma membrane							6.17701	1.3563	276	0.78125	0.0715701	0.953125	0.00135878	1	8.00345e-05
P00748	Coagulation factor XII;Coagulation factor XIIa heavy chain;Beta-factor XIIa part 1;Coagulation factor XIIa light chain	F12	+	+	+	27.6887	22.521	25.2853	+	+				+						Nervous system disease	Central Nervous system neoplasm		Astrocytoma									S01.211		plasma membrane		endoplasmic reticulum		Organelli			3.20144	0.73608	716	0.96875	0.000109754	0.585938	0.0923683	0.765625	0.100577
P00749-2;P00749	Urokinase-type plasminogen activator;Urokinase-type plasminogen activator long chain A;Urokinase-type plasminogen activator short chain A;Urokinase-type plasminogen activator chain B	PLAU			+	21.455	22.2648	22.0581												Nervous system disease	Central Nervous system neoplasm	epilepsy	Astrocytoma	Medulloblastoma								S01.231		plasma membrane							0.251653	0.034644	1563	0.640625	0.209183	0.609375	0.297914	0.53125	0.718879
P00751;P00751-2	Complement factor B;Complement factor B Ba fragment;Complement factor B Bb fragment	CFB	+	+	+	32.1693	28.3583	29.3375	+	+	+			+						Nervous system disease	Central Nervous system neoplasm	epilepsy										S01.196		plasma membrane							4.22963	0.95564	526	0.921875	0.00107248	1	2.84607e-05	0.671875	0.340236
P00915	Carbonic anhydrase 1	CA1	+	+	+	29.8599	30.9641	27.0475												Nervous system disease	Central Nervous system neoplasm	epilepsy	Astrocytoma																		2.9903	0.68124	765	0.632812	0.396279	0.640625	0.113145	0.8125	0.0437336
P00918	Carbonic anhydrase 2	CA2	+	+	+	25.706	30.9534	28.4353	+	+				+						Nervous system disease	Central Nervous system neoplasm	epilepsy	Astrocytoma	Medulloblastoma										plasma membrane					cytoplasm		6.20182	1.3624	274	0.921875	0.00187727	0.734375	0.0878218	0.828125	0.0271476
P01008	Antithrombin-III	SERPINC1	+	+	+	32.9009	28.5529	28.9235	+	+	+			+						Nervous system disease	Central Nervous system neoplasm	epilepsy	Astrocytoma									I04.018		plasma membrane		endoplasmic reticulum		Organelli			6.48162	1.4397	245	1	6.43997e-05	1	1.16773e-08	0.523438	0.647932
P01009;P01009-2;P01009-3	Alpha-1-antitrypsin;Short peptide from AAT	SERPINA1	+	+	+	37.1839	34.4957	33.1584	+	+	+			+						Nervous system disease	Central Nervous system neoplasm	epilepsy	Astrocytoma									I04.001			Golgi	endoplasmic reticulum		Organelli			7.11679	1.5853	191	0.945312	0.00064238	1	2.94144e-06	0.84375	0.0303073
P01011;P01011-2;P01011-3	Alpha-1-antichymotrypsin;Alpha-1-antichymotrypsin His-Pro-less	SERPINA3	+	+	+	34.5632	30.0157	29.4476	+	+	+			+						Nervous system disease	Central Nervous system neoplasm	epilepsy	Astrocytoma									I04.002								nucleus	2.53743	0.59727	844	1	1.04164e-05	1	2.46364e-10	0.5	0.4414
P01019	Angiotensinogen;Angiotensin-1;Angiotensin-2;Angiotensin-3;Angiotensin-4;Angiotensin 1-9;Angiotensin 1-7;Angiotensin 1-5;Angiotensin 1-4	AGT	+	+	+	33.9165	30.7214	31.1543	+	+	+			+						Nervous system disease	Central Nervous system neoplasm	epilepsy	Astrocytoma	Medulloblastoma	Synapse							I04.953									6.84759	1.5238	214	1	3.1248e-07	1	2.43195e-05	0.578125	0.417975
P01023	Alpha-2-macroglobulin	A2M	+	+	+	35.478	32.2471	33.8768	+	+	+			+						Nervous system disease	Central Nervous system neoplasm	epilepsy	Astrocytoma									I39.001									4.7266	1.0714	448	1	0.000283389	0.9375	0.0144512	0.859375	0.0186466
P01024;O95568	Complement C3;Complement C3 beta chain;C3-beta-c;Complement C3 alpha chain;C3a anaphylatoxin;Acylation stimulating protein;Complement C3b alpha chain;Complement C3c alpha chain fragment 1;Complement C3dg fragment;Complement C3g fragment;Complement C3d fragment;Complement C3f fragment;Complement C3c alpha chain fragment 2	C3	+	+	+	36.4243	33.7237	34.1215	+	+	+			+						Nervous system disease	Central Nervous system neoplasm	epilepsy	Astrocytoma	Medulloblastoma								I39.950		plasma membrane		endoplasmic reticulum		Organelli		nucleus	4.50377	1.0163	482	1	5.76133e-05	1	2.08598e-05	0.664062	0.459633
P01031;CON__Q1A7A4	Complement C5;Complement C5 beta chain;Complement C5 alpha chain;C5a anaphylatoxin;Complement C5 alpha chain	C5	+	+	+	30.6583	28.2324	30.5796	+	+		+		+						Nervous system disease	Central Nervous system neoplasm	epilepsy	Astrocytoma	Medulloblastoma								I39.952									3.24279	0.74888	708	0.921875	0.00449377	0.523438	0.876544	0.90625	0.00539156
P01033	Metalloproteinase inhibitor 1	TIMP1	+	+	+	29.021	22.3221	25.436	+	+	+			+						Nervous system disease	Central Nervous system neoplasm	epilepsy	Astrocytoma	Medulloblastoma								I35.001				endoplasmic reticulum		Organelli			8.19702	1.7733	126	1	2.77094e-06	1	1.11936e-06	0.84375	0.00542174
P01034	Cystatin-C	CST3	+	+	+	34.0551	31.8619	30.6785												Nervous system disease	Central Nervous system neoplasm	epilepsy	Astrocytoma	Medulloblastoma								I25.004		plasma membrane	Golgi	endoplasmic reticulum		Organelli	cytoplasm		4.19664	0.95084	530	0.78125	0.00676196	0.992188	6.09712e-06	0.71875	0.133874
P01042;CON__P01045-1;CON__Q2KJ62;CON__P01044-1	Kininogen-1;Kininogen-1 heavy chain;T-kinin;Bradykinin;Lysyl-bradykinin;Kininogen-1 light chain;Low molecular weight growth-promoting factor	KNG1	+	+	+	31.3759	28.2795	28.178	+	+	+			+						Nervous system disease	Central Nervous system neoplasm	epilepsy	Astrocytoma									I25.016		plasma membrane		endoplasmic reticulum		Organelli			1.82428	0.38814	1036	0.953125	0.00436063	1	1.12809e-07	0.640625	0.909623
P01042-2;P01042-3	Kininogen-1;Kininogen-1 heavy chain;T-kinin;Bradykinin;Lysyl-bradykinin;Kininogen-1 light chain;Low molecular weight growth-promoting factor	KNG1	+	+	+	23.7343	23.9723	24.0648												Nervous system disease	Central Nervous system neoplasm		Astrocytoma									I25.016		plasma membrane		endoplasmic reticulum		Organelli			0.808792	0.14579	1358	0.578125	0.87071	0.546875	0.701903	0.5	0.943628
P01111	GTPase NRas	NRAS			+	21.1567	23.0902	21.2767	+	+		+		+						Nervous system disease	Central Nervous system neoplasm	epilepsy	Astrocytoma	Medulloblastoma	Synapse	Synaptosome		Cholinergic synapse	Serotonergic synapse					plasma membrane	Golgi	endoplasmic reticulum		Organelli			2.22697	0.51467	916	1	0.000279288	0.53125	0.792154	0.890625	0.00443572
P01116-2;P01116	GTPase KRas;GTPase KRas, N-terminally processed	KRAS		+	+	21.0976	22.5976	22.9168												Nervous system disease	Central Nervous system neoplasm	epilepsy	Astrocytoma	Medulloblastoma	Synapse	Synaptosome		Cholinergic synapse	Serotonergic synapse					plasma membrane	Golgi	endoplasmic reticulum		Organelli	cytoplasm		2.12613	0.48262	943	0.796875	0.0380857	0.921875	0.00129078	0.578125	0.622097
P01127-2;P01127	Platelet-derived growth factor subunit B	PDGFB	+		+	25.154	21.7056	21.3698	+	+	+			+						Nervous system disease	Central Nervous system neoplasm		Astrocytoma											plasma membrane	Golgi	endoplasmic reticulum		Organelli	cytoplasm		5.49846	1.24	345	0.984375	1.77077e-05	1	2.16581e-06	0.53125	0.612856
P01210	Proenkephalin-A;Synenkephalin;Met-enkephalin;PENK(114-133);PENK(143-183);Met-enkephalin-Arg-Gly-Leu;Leu-enkephalin;PENK(237-258);Met-enkephalin-Arg-Phe	PENK	+	+	+	27.93	25.1603	24.0601												Nervous system disease	Central Nervous system neoplasm	epilepsy	Astrocytoma	Medulloblastoma	Synapse									plasma membrane		endoplasmic reticulum		Organelli			1.01203	0.19895	1284	0.765625	0.0924272	0.828125	0.0109727	0.578125	0.538559
P01303	Pro-neuropeptide Y;Neuropeptide Y;C-flanking peptide of NPY	NPY	+			25.8272	20.8886	21.0484	+	+	+			+						Nervous system disease	Central Nervous system neoplasm	epilepsy	Astrocytoma	Medulloblastoma	Synapse										Golgi			Organelli	cytoplasm		8.1833	1.7729	127	1	3.59401e-09	1	4.1428e-07	0.53125	0.767753
P01591	Immunoglobulin J chain	IGJ	+	+	+	26.5216	22.3228	27.9636	+	+		+		+						Nervous system disease	Central Nervous system neoplasm	epilepsy	Astrocytoma																		4.96308	1.1202	414	0.890625	0.000496571	0.734375	0.169781	1	8.8831e-08
P01594;P01593	Ig kappa chain V-I region AU;Ig kappa chain V-I region AG		+	+		27.1422	20.5894	22.9152	+	+	+			+																				plasma membrane							6.06891	1.3504	283	1	6.16381e-07	0.9375	0.000949061	0.875	0.00855314
P04432;P01597	Ig kappa chain V-I region Daudi;Ig kappa chain V-I region DEE		+	+	+	26.6291	23.6754	27.1621	+	+				+																				plasma membrane							3.90896	0.90238	567	0.953125	0.00117763	0.65625	0.256921	0.96875	0.000307484
P01602	Ig kappa chain V-I region HK102	IGKV1-5	+	+		24.2561	20.8212	23.0938	+	+				+																				plasma membrane							2.20827	0.51162	920	0.875	0.000269635	0.65625	0.295117	0.875	0.0142135
P01619	Ig kappa chain V-III region B6		+	+	+	29.7315	24.8728	29.7891	+	+		+		+																				plasma membrane							4.61705	1.0329	469	0.984375	9.85142e-05	0.59375	0.907293	1	5.08326e-05
P01624;A0A0C4DH55;A0A075B6H7	Ig kappa chain V-III region POM		+	+	+	28.8659	23.0648	27.9686	+	+				+																				plasma membrane							5.97447	1.3145	298	1	1.38916e-06	0.734375	0.1147	1	5.60092e-07
P01700;P01699	Ig lambda chain V-I region HA;Ig lambda chain V-I region VOR		+	+	+	27.1528	21.7685	26.261	+	+				+																				plasma membrane							5.51221	1.2472	341	0.96875	5.6928e-06	0.734375	0.155514	0.96875	3.2395e-05
P01701	Ig lambda chain V-I region NEW		+			26.1007	20.571	21.5174	+	+	+			+																				plasma membrane							7.50124	1.6341	171	1	4.21935e-07	1	2.71152e-06	0.84375	0.0194654
P01703	Ig lambda chain V-I region NEWM	IGLV1-40	+	+		26.2513	20.1675	23.3453	+	+	+	+	+	+	+																			plasma membrane							9.73258	2.1043	72	1	2.22179e-10	0.890625	0.00186734	0.96875	0.00128535
P01704	Ig lambda chain V-II region TOG		+			26.2875	20.5205	20.827	+	+	+			+																				plasma membrane							8.08683	1.7591	133	1	2.47891e-09	1	4.1967e-09	0.59375	0.491111
P01714	Ig lambda chain V-III region SH		+	+		25.5511	20.7354	23.6981	+	+		+		+																				plasma membrane							5.10402	1.1589	389	1	4.44464e-08	0.765625	0.0328534	0.9375	0.000976139
P01715	Ig lambda chain V-IV region Bau		+			24.4554	20.7972	21.2603	+	+	+			+																				plasma membrane							3.67235	0.86047	613	0.875	0.00152705	0.828125	0.00478867	0.625	0.277986
P01717	Ig lambda chain V-IV region Hil		+	+	+	26.4568	23.3982	25.3247	+	+				+																				plasma membrane							1.60408	0.32851	1113	0.921875	0.00148499	0.632812	0.253095	0.75	0.115945
P01721	Ig lambda chain V-VI region AR		+	+		26.4556	20.8748	24.2427	+	+		+		+																				plasma membrane							4.70281	1.0694	451	1	3.58385e-10	0.71875	0.0555903	0.78125	0.00694592
P01742	Ig heavy chain V-I region EU		+			27.0174	20.1449	21.7662	+	+	+			+																				plasma membrane							8.28311	1.7915	121	1	1.54409e-10	1	1.01284e-06	0.8125	0.0202248
P01743	Ig heavy chain V-I region HG3		+			24.5409	20.1009	21.5676	+	+	+			+																				plasma membrane							3.23092	0.7446	710	0.90625	0.000228487	0.875	0.00338722	0.875	0.0162419
P01764	Ig heavy chain V-III region 23	IGHV3-23	+	+		23.8279	20.352	24.3744	+	+		+		+																				plasma membrane							3.24004	0.74673	709	0.90625	0.000749633	0.5625	0.661788	0.90625	0.00127985
P0DP03;P01768	Ig heavy chain V-III region CAM		+	+		24.5112	20.6722	21.9917	+	+				+								epilepsy												plasma membrane							2.15484	0.49415	932	0.90625	0.00115213	0.78125	0.0250997	0.828125	0.0413525
P01780;A0A0B4J1V1;P01763;P01762	Ig heavy chain V-III region JON;Ig heavy chain V-III region WEA;Ig heavy chain V-III region TRO	IGHV3-21	+	+	+	27.612	21.991	26.2048	+	+		+		+								epilepsy												plasma membrane							5.62665	1.2744	325	1	5.20417e-07	0.8125	0.125951	0.921875	0.000260198
P01782;P0DP04;A0A0C4DH32	Ig heavy chain V-III region DOB		+	+		28.5093	20.3137	26.1234	+	+	+			+								epilepsy												plasma membrane							8.8029	1.9708	100	1	1.08908e-11	0.953125	0.000266425	1	1.41944e-09
P01833	Polymeric immunoglobulin receptor;Secretory component	PIGR	+	+		23.0742	20.6749	26.2899	+	+	+			+						Nervous system disease	Central Nervous system neoplasm	epilepsy												plasma membrane							6.32989	1.3851	265	0.984375	0.00727269	0.890625	0.00166008	1	7.4065e-09
P01834	Ig kappa chain C region	IGKC	+	+	+	30.5711	23.0312	29.4331	+	+				+																				plasma membrane							6.01746	1.3239	292	1	1.77929e-05	0.59375	0.1663	1	8.46086e-06
P01859	Ig gamma-2 chain C region	IGHG2	+	+	+	31.6666	28.9341	32.4682														epilepsy												plasma membrane							1.94311	0.42735	989	0.773438	0.0374161	0.578125	0.392275	0.90625	0.00307931
P01860	Ig gamma-3 chain C region	IGHG3	+	+	+	30.2185	26.9798	29.9815	+	+				+								epilepsy												plasma membrane							5.98865	1.3199	296	0.96875	0.000287606	0.5625	0.686394	0.984375	0.000289936
P01861	Ig gamma-4 chain C region	IGHG4	+	+		25.7755	20.661	23.1525	+	+				+								epilepsy												plasma membrane							4.38424	0.99467	500	0.90625	0.000190685	0.78125	0.0564567	0.859375	0.00881091
P01871;P01871-2	Ig mu chain C region	IGHM	+	+	+	30.8001	28.8088	32.0011	+	+				+								epilepsy												plasma membrane							1.84007	0.39514	1028	0.828125	0.0268069	0.75	0.117711	0.921875	0.00194763
P01876	Ig alpha-1 chain C region	IGHA1	+	+	+	30.1639	24.4318	28.1014	+	+				+						Nervous system disease	Central Nervous system neoplasm	epilepsy	Astrocytoma											plasma membrane							1.4932	0.2968	1148	0.859375	0.010271	0.65625	0.284399	0.765625	0.113202
P01889	HLA class I histocompatibility antigen, B-7 alpha chain	HLA-B		+	+	22.1712	26.0665	24.15	+	+				+						Nervous system disease	Central Nervous system neoplasm	epilepsy	Astrocytoma											plasma membrane	Golgi	endoplasmic reticulum		Organelli			3.50567	0.81774	648	0.984375	2.83096e-06	0.75	0.0627994	0.8125	0.0740564
P01903	HLA class II histocompatibility antigen, DR alpha chain	HLA-DRA	+	+	+	22.0822	30.0176	27.5512	+	+	+	+	+	+	+					Nervous system disease	Central Nervous system neoplasm		Astrocytoma											plasma membrane	Golgi	endoplasmic reticulum		Organelli			11.8978	2.5508	27	1	1.519e-09	1	8.75699e-08	0.96875	5.80116e-05
P01909	HLA class II histocompatibility antigen, DQ alpha 1 chain	HLA-DQA1			+	21.2737	23.0608	21.2564	+	+				+						Nervous system disease		epilepsy												plasma membrane	Golgi	endoplasmic reticulum		Organelli			1.26326	0.24759	1212	0.8125	0.0124737	0.625	0.978777	0.9375	0.00676701
P01911	HLA class II histocompatibility antigen, DRB1-15 beta chain	HLA-DRB1		+	+	21.5722	27.8581	26.7995	+	+	+			+						Nervous system disease	Central Nervous system neoplasm	epilepsy	Astrocytoma	Medulloblastoma										plasma membrane	Golgi	endoplasmic reticulum		Organelli			6.56419	1.4567	238	0.984375	5.03261e-06	1	2.37572e-07	0.8125	0.227099
P02008	Hemoglobin subunit zeta	HBZ	+	+	+	23.4558	26.0543	25.7264												Nervous system disease																					0.479335	0.078832	1482	0.671875	0.22694	0.734375	0.144023	0.5	0.866748
P02042	Hemoglobin subunit delta	HBD	+	+	+	30.2233	30.9914	31.1047												Nervous system disease	Central Nervous system neoplasm																				0.678563	0.11395	1409	0.59375	0.594919	0.5625	0.533925	0.515625	0.911662
P02100	Hemoglobin subunit epsilon	HBE1	+	+	+	24.6798	30.1202	30.8226	+	+	+			+						Nervous system disease	Central Nervous system neoplasm		Astrocytoma																		2.34671	0.54744	889	0.90625	0.0058742	0.96875	0.00013654	0.5	0.665048
P02452;CON__Q862S4	Collagen alpha-1(I) chain	COL1A1	+	+	+	27.9166	28.078	32.5671												Nervous system disease	Central Nervous system neoplasm	epilepsy	Astrocytoma	Medulloblastoma											Golgi	endoplasmic reticulum		Organelli	cytoplasm		2.45508	0.57689	863	0.53125	0.905453	0.9375	0.00287256	0.8125	0.0164737
P02458;P02458-1	Collagen alpha-1(II) chain;Collagen alpha-1(II) chain;Chondrocalcin	COL2A1		+	+	21.4476	24.177	26.6308												Nervous system disease	Central Nervous system neoplasm	epilepsy		Medulloblastoma												endoplasmic reticulum		Organelli			1.82501	0.39007	1035	0.765625	0.0269108	0.84375	0.00906711	0.625	0.234557
P02461;P02461-2	Collagen alpha-1(III) chain	COL3A1	+	+	+	26.9048	23.1672	29.1091	+			+		+						Nervous system disease	Central Nervous system neoplasm	epilepsy	Astrocytoma	Medulloblastoma												endoplasmic reticulum		Organelli			1.98247	0.44257	978	0.765625	0.0233047	0.703125	0.213203	0.875	0.00906539
P02462;P29400;P29400-2	Collagen alpha-1(IV) chain;Arresten	COL4A1	+	+	+	21.3808	20.8824	29.4271												Nervous system disease	Central Nervous system neoplasm	epilepsy	Astrocytoma													endoplasmic reticulum		Organelli			8.94668	1.9818	96	0.65625	0.196448	1	5.75887e-10	1	5.26185e-11
P02511	Alpha-crystallin B chain	CRYAB		+	+	21.6955	28.1049	26.7048	+	+	+			+						Nervous system disease	Central Nervous system neoplasm	epilepsy	Astrocytoma		Synapse										Golgi		mitochondrion	Organelli	cytoplasm	nucleus	8.53172	1.8899	108	1	2.84984e-07	1	1.64079e-07	0.828125	0.0238763
P02545-2;P02545-6;P02545-3;P02545;P02545-5;P02545-4	Prelamin-A/C;Lamin-A/C	LMNA	+			21.7414	20.3701	21.6995	+	+		+		+						Nervous system disease	Central Nervous system neoplasm	epilepsy																	cytoplasm	nucleus	5.87801	1.2999	308	0.921875	0.00695191	0.515625	0.923537	0.90625	0.00229441
P02549;P02549-2	Spectrin alpha chain, erythrocytic 1	SPTA1	+	+	+	24.9883	32.4109	26.3236	+	+				+						Nervous system disease	Central Nervous system neoplasm	epilepsy	Astrocytoma											plasma membrane					cytoplasm		5.05796	1.1347	401	0.96875	0.000116231	0.546875	0.514002	0.90625	0.00433531
P02647	Apolipoprotein A-I;Proapolipoprotein A-I;Truncated apolipoprotein A-I	APOA1	+	+	+	35.7921	34.4428	32.9817												Nervous system disease	Central Nervous system neoplasm	epilepsy	Astrocytoma											plasma membrane		endoplasmic reticulum		Organelli	cytoplasm		3.89818	0.89855	572	0.726562	0.202953	0.914062	0.000453709	0.875	0.10179
P02649;CON__Q03247	Apolipoprotein E	APOE	+	+	+	34.395	33.0377	32.6659												Nervous system disease	Central Nervous system neoplasm	epilepsy	Astrocytoma	Medulloblastoma	Synapse									plasma membrane	Golgi	endoplasmic reticulum		Organelli	cytoplasm	nucleus	3.89344	0.89698	573	0.703125	0.0463179	1	1.33556e-05	0.53125	0.551408
P02652	Apolipoprotein A-II;Proapolipoprotein A-II;Truncated apolipoprotein A-II	APOA2	+	+	+	31.6691	29.1707	29.2993	+		+			+						Nervous system disease																endoplasmic reticulum		Organelli			0.670983	0.10912	1414	0.867188	0.0355798	0.921875	0.000409665	0.5	0.897991
P02654	Apolipoprotein C-I;Truncated apolipoprotein C-I	APOC1	+	+	+	28.2286	30.4335	29.1817	+	+				+						Nervous system disease	Central Nervous system neoplasm		Astrocytoma													endoplasmic reticulum		Organelli			3.20581	0.7364	715	0.953125	0.00188718	0.804688	0.0399876	0.8125	0.0262463
P02655	Apolipoprotein C-II;Proapolipoprotein C-II	APOC2	+	+	+	27.8556	25.2175	23.2345												Nervous system disease	Central Nervous system neoplasm	epilepsy																			1.81081	0.3826	1044	0.796875	0.0178432	0.96875	0.000959453	0.734375	0.17324
P02656	Apolipoprotein C-III	APOC3	+	+	+	29.3118	29.8867	28.0841												Nervous system disease		epilepsy																			0.422043	0.067345	1501	0.71875	0.565277	0.757812	0.0648291	0.859375	0.0761516
P02671;P02671-2;CON__P02672	Fibrinogen alpha chain;Fibrinopeptide A;Fibrinogen alpha chain	FGA	+	+	+	33.3527	35.2569	35.4168	+	+	+			+						Nervous system disease	Central Nervous system neoplasm	epilepsy	Astrocytoma	Medulloblastoma										plasma membrane		endoplasmic reticulum		Organelli			6.36195	1.3966	260	0.953125	0.000287272	0.890625	0.00106464	0.5625	0.792042
P02675	Fibrinogen beta chain;Fibrinopeptide B;Fibrinogen beta chain	FGB	+	+	+	33.2205	34.9082	37.0362	+	+	+	+	+	+	+					Nervous system disease	Central Nervous system neoplasm	epilepsy	Astrocytoma											plasma membrane		endoplasmic reticulum		Organelli			10.469	2.3014	50	0.875	0.00937165	0.984375	3.08016e-05	0.84375	0.0111057
P02679	Fibrinogen gamma chain	FGG	+	+	+	33.4387	34.3332	36.4374												Nervous system disease	Central Nervous system neoplasm	epilepsy	Astrocytoma											plasma membrane		endoplasmic reticulum		Organelli			3.38642	0.7844	672	0.804688	0.0826476	0.90625	0.000235882	0.828125	0.00961767
P02679-2	Fibrinogen gamma chain	FGG		+		21.3316	20.427	25.122	+	+	+			+						Nervous system disease	Central Nervous system neoplasm		Astrocytoma											plasma membrane		endoplasmic reticulum		Organelli			3.29847	0.7628	697	0.890625	0.00648963	0.875	0.00304528	0.90625	0.000583953
P02724-3;P02724-2;P02724;REV__Q9NYV4-3;REV__Q9NYV4-2;REV__Q9NYV4	Glycophorin-A	GYPA	+	+	+	22.7466	32.2394	28.4771	+	+	+			+						Nervous system disease	Central Nervous system neoplasm	epilepsy	Astrocytoma								CD235a			plasma membrane							4.89781	1.0965	428	0.953125	8.39222e-05	0.875	0.00404053	0.828125	0.0718193
P02730;P02730-2	Band 3 anion transport protein	SLC4A1	+	+	+	25.4419	35.2727	31.9979	+	+	+	+	+	+	+					Nervous system disease	Central Nervous system neoplasm	epilepsy	Astrocytoma								CD233			plasma membrane					cytoplasm		12.7895	2.7313	16	1	8.69223e-06	0.96875	0.000871914	0.882812	0.00671399
P02741;P02741-2	C-reactive protein;C-reactive protein(1-205)	CRP	+	+	+	26.6833	21.6561	24.1615	+	+				+						Nervous system disease	Central Nervous system neoplasm	epilepsy	Astrocytoma																		3.50413	0.81175	650	0.9375	0.000600583	0.8125	0.0501383	0.8125	0.0663721
P02743	Serum amyloid P-component;Serum amyloid P-component(1-203)	APCS	+	+	+	26.4052	26.5212	28.1001												Nervous system disease																				nucleus	1.02775	0.20101	1280	0.578125	0.92152	0.773438	0.056752	0.71875	0.157344
P02745	Complement C1q subcomponent subunit A	C1QA	+	+	+	28.1692	27.7746	33.2632	+			+		+						Nervous system disease	Central Nervous system neoplasm	epilepsy	Astrocytoma																		6.08218	1.3505	282	0.71875	0.739347	1	4.01156e-09	0.953125	0.000483322
P02746	Complement C1q subcomponent subunit B	C1QB	+	+	+	30.1004	30.0342	35.0064												Nervous system disease	Central Nervous system neoplasm		Astrocytoma																		4.86899	1.0913	433	0.59375	0.933281	1	4.28825e-09	1	3.54228e-05
P02747	Complement C1q subcomponent subunit C	C1QC	+	+	+	30.0778	28.6235	33.7314												Nervous system disease	Central Nervous system neoplasm	epilepsy	Astrocytoma																		4.45561	1.01	488	0.75	0.171524	1	2.20305e-08	0.984375	0.000199756
P02748	Complement component C9;Complement component C9a;Complement component C9b	C9	+	+	+	30.1696	27.2993	28.8899	+	+	+			+						Nervous system disease	Central Nervous system neoplasm	epilepsy	Astrocytoma											plasma membrane							0.890035	0.16808	1335	0.90625	0.00442242	0.953125	0.00131997	0.78125	0.0887231
P02749;CON__P17690	Beta-2-glycoprotein 1	APOH	+	+	+	30.1133	26.8243	27.3532	+	+	+			+						Nervous system disease		epilepsy																			5.79268	1.2873	315	0.96875	0.00107179	0.921875	0.000126609	0.546875	0.570912
P02750	Leucine-rich alpha-2-glycoprotein	LRG1	+	+	+	30.6168	24.9654	22.1218	+	+	+			+						Nervous system disease	Central Nervous system neoplasm		Astrocytoma																		6.42727	1.4225	252	1	6.62293e-06	1	2.12077e-08	0.859375	0.016811
P02751;P02751-7;P02751-12;P02751-16;P02751-2	Fibronectin;Anastellin;Ugl-Y1;Ugl-Y2;Ugl-Y3	FN1	+			24.0375	20.6074	21.1605	+	+	+			+						Nervous system disease	Central Nervous system neoplasm	epilepsy	Astrocytoma	Medulloblastoma										plasma membrane	Golgi	endoplasmic reticulum		Organelli			3.81545	0.88523	585	0.890625	0.000611534	0.882812	0.00442095	0.625	0.332771
P02751-1;P02751-3;P02751-8;P02751-17;P02751-14;P02751-6;P02751-9;P02751-4	Fibronectin;Anastellin;Ugl-Y1;Ugl-Y2;Ugl-Y3	FN1	+	+	+	33.4339	32.7232	36.3228	+			+		+						Nervous system disease	Central Nervous system neoplasm		Astrocytoma	Medulloblastoma										plasma membrane	Golgi	endoplasmic reticulum		Organelli			5.18492	1.1714	381	0.648438	0.262641	1	5.883e-06	0.96875	0.000139892
P02751-5	Fibronectin;Anastellin;Ugl-Y1;Ugl-Y2;Ugl-Y3	FN1	+	+	+	25.4456	21.6303	24.8417	+	+				+						Nervous system disease	Central Nervous system neoplasm		Astrocytoma	Medulloblastoma										plasma membrane	Golgi	endoplasmic reticulum		Organelli			1.48759	0.29304	1152	0.90625	0.00150043	0.546875	0.679615	0.75	0.0384503
P02753	Retinol-binding protein 4;Plasma retinol-binding protein(1-182);Plasma retinol-binding protein(1-181);Plasma retinol-binding protein(1-179);Plasma retinol-binding protein(1-176)	RBP4	+	+	+	28.776	23.908	22.8881	+	+	+			+						Nervous system disease	Central Nervous system neoplasm	epilepsy	Astrocytoma	Medulloblastoma																	3.73559	0.8712	601	0.9375	0.00234896	1	2.50235e-06	0.5625	0.447653
P02760;CON__P00978	Protein AMBP;Alpha-1-microglobulin;Inter-alpha-trypsin inhibitor light chain;Trypstatin	AMBP	+	+	+	29.3313	23.5733	24.513	+	+	+			+						Nervous system disease												I02.005		plasma membrane		endoplasmic reticulum		Organelli			5.56735	1.2556	336	0.984375	1.32001e-05	1	7.11917e-05	0.578125	0.394163
P02763	Alpha-1-acid glycoprotein 1	ORM1	+	+	+	34.505	30.8153	27.2288	+	+	+	+	+	+	+					Nervous system disease		epilepsy																			12.5672	2.622	20	1	1.14172e-05	1	3.02773e-08	0.96875	0.00066446
P02765	Alpha-2-HS-glycoprotein;Alpha-2-HS-glycoprotein chain A;Alpha-2-HS-glycoprotein chain B	AHSG	+	+	+	31.6017	34.4692	32.053												Nervous system disease	Central Nervous system neoplasm		Astrocytoma									I25.020			Golgi	endoplasmic reticulum		Organelli			0.96511	0.18759	1304	0.828125	0.0863399	0.59375	0.746559	0.679688	0.255352
P02766	Transthyretin	TTR	+	+	+	36.8695	34.4409	32.629	+	+	+	+	+	+	+					Nervous system disease	Central Nervous system neoplasm	epilepsy	Astrocytoma	Medulloblastoma																	9.92592	2.1423	66	0.890625	0.00134318	1	1.46371e-06	0.890625	0.00879798
P02774;P02774-3;P02774-2;CON__Q3MHN5;CON__ENSEMBL:ENSBTAP00000018229	Vitamin D-binding protein	GC	+	+	+	33.3202	29.879	29.0809	+	+	+			+						Nervous system disease	Central Nervous system neoplasm	epilepsy	Astrocytoma																cytoplasm		6.89073	1.5309	212	1	0.000288222	1	2.39451e-09	0.765625	0.285564
P02776;P10720	Platelet factor 4;Platelet factor 4, short form;Platelet factor 4 variant;Platelet factor 4 variant(4-74);Platelet factor 4 variant(5-74);Platelet factor 4 variant(6-74)	PF4;PF4V1		+	+	21.7994	24.389	25.4354	+	+	+			+						Nervous system disease	Central Nervous system neoplasm	epilepsy	Astrocytoma																cytoplasm		1.71194	0.36174	1073	0.875	0.0177801	0.921875	0.00148475	0.609375	0.401616
P02786;Q9UP52-2;Q9UP52-3;Q9UP52	Transferrin receptor protein 1;Transferrin receptor protein 1, serum form	TFRC	+	+	+	23.3985	23.826	25.4436												Nervous system disease	Central Nervous system neoplasm	epilepsy	Astrocytoma	Medulloblastoma							CD71	M28.972;M28.973		plasma membrane			mitochondrion	Organelli	cytoplasm	nucleus	0.540555	0.089993	1455	0.546875	0.743916	0.71875	0.172204	0.6875	0.297156
P02787;CON__Q2HJF0	Serotransferrin	TF	+	+	+	37.1537	33.1412	31.9721	+	+	+			+						Nervous system disease	Central Nervous system neoplasm	epilepsy	Astrocytoma	Medulloblastoma								S60.972		plasma membrane		endoplasmic reticulum		Organelli	cytoplasm		6.63542	1.4764	233	0.992188	3.89921e-05	1	9.77952e-08	0.78125	0.0545587
P02788;P02788-2	Lactotransferrin;Lactoferricin-H;Kaliocin-1;Lactoferroxin-A;Lactoferroxin-B;Lactoferroxin-C	LTF	+	+	+	29.0816	29.1613	32.5426												Nervous system disease	Central Nervous system neoplasm	epilepsy	Astrocytoma									S60.001		plasma membrane					cytoplasm	nucleus	1.04291	0.20483	1276	0.59375	0.967656	0.875	0.0079994	0.796875	0.0784107
P02790;CON__Q3SZV7	Hemopexin	HPX	+	+	+	33.5426	28.3218	24.2341	+	+	+	+	+	+	+					Nervous system disease	Central Nervous system neoplasm		Astrocytoma																		10.6916	2.3518	44	1	3.39085e-05	1	9.52012e-07	0.84375	0.00982246
P02792	Ferritin light chain	FTL	+	+	+	29.8638	31.4606	32.5341												Nervous system disease	Central Nervous system neoplasm		Astrocytoma																cytoplasm		1.13818	0.21966	1251	0.703125	0.250665	0.804688	0.0282069	0.65625	0.455299
P02794	Ferritin heavy chain;Ferritin heavy chain, N-terminally processed	FTH1	+	+	+	27.8466	30.8692	31.0174	+	+	+			+						Nervous system disease	Central Nervous system neoplasm	epilepsy	Astrocytoma																cytoplasm	nucleus	3.17022	0.73206	722	0.90625	0.00816321	0.90625	0.00428915	0.5625	0.849797
P03950	Angiogenin	ANG		+	+	22.0397	24.1936	25.0828	+	+	+			+						Nervous system disease	Central Nervous system neoplasm		Astrocytoma																cytoplasm	nucleus	1.21385	0.23638	1226	0.84375	0.026012	0.953125	0.000334598	0.59375	0.374006
P03952;P20718	Plasma kallikrein;Plasma kallikrein heavy chain;Plasma kallikrein light chain	KLKB1	+		+	25.524	22.2013	21.0695	+	+	+			+						Nervous system disease	Central Nervous system neoplasm	epilepsy	Astrocytoma									S01.147;S01.212		plasma membrane					cytoplasm		5.61361	1.2681	329	0.890625	0.00130893	1	4.7973e-06	0.671875	0.139276
P03973	Antileukoproteinase	SLPI				21.9879	20.5278	21.4013	+	+				+						Nervous system disease												I17.001			Golgi			Organelli			3.80979	0.88269	589	0.9375	0.000791989	0.671875	0.215838	0.75	0.0912393
P04003;CON__Q28065	C4b-binding protein alpha chain	C4BPA	+	+	+	25.6172	26.1412	29.6141	+			+		+						Nervous system disease														plasma membrane							2.31584	0.53823	897	0.617188	0.731149	0.96875	0.00246073	0.9375	0.00949312
P04004	Vitronectin;Vitronectin V65 subunit;Vitronectin V10 subunit;Somatomedin-B	VTN	+	+	+	32.0621	32.2429	31.669												Nervous system disease	Central Nervous system neoplasm	epilepsy	Astrocytoma												Golgi	endoplasmic reticulum		Organelli			1.75372	0.371	1058	0.546875	0.748551	0.773438	0.416211	0.6875	0.388492
P04040	Catalase	CAT	+	+	+	27.8175	30.0013	28.483												Nervous system disease	Central Nervous system neoplasm	epilepsy	Astrocytoma											plasma membrane	Golgi	endoplasmic reticulum	mitochondrion	Organelli	cytoplasm		2.11691	0.47914	945	0.671875	0.139492	0.578125	0.598132	0.703125	0.151926
P04066	Tissue alpha-L-fucosidase	FUCA1	+		+	24.7511	20.6294	21.5301	+	+	+			+						Nervous system disease		epilepsy																	cytoplasm		6.93222	1.5402	208	1	9.44677e-07	1	8.3086e-05	0.71875	0.140454
P04070;P04070-2	Vitamin K-dependent protein C;Vitamin K-dependent protein C light chain;Vitamin K-dependent protein C heavy chain;Activation peptide	PROC	+	+	+	24.9243	28.3877	24.9301	+	+				+						Nervous system disease		epilepsy										S01.218			Golgi	endoplasmic reticulum		Organelli			0.893754	0.16953	1331	0.828125	0.0283495	0.625	0.996961	0.703125	0.105998
P04075;P04075-2	Fructose-bisphosphate aldolase A	ALDOA	+	+	+	29.1388	30.5058	29.523	+	+				+						Nervous system disease	Central Nervous system neoplasm																			nucleus	1.36074	0.27034	1183	0.890625	0.0216574	0.65625	0.482447	0.6875	0.0806117
P04080	Cystatin-B	CSTB	+	+	+	26.8853	26.4983	24.7995												Nervous system disease	Central Nervous system neoplasm	epilepsy	Astrocytoma									I25.003							cytoplasm	nucleus	1.06934	0.21203	1264	0.578125	0.502667	0.765625	0.0560461	0.6875	0.129083
P04083	Annexin A1	ANXA1	+	+	+	22.2175	30.5196	28.7711	+	+	+	+	+	+	+					Nervous system disease	Central Nervous system neoplasm	epilepsy	Astrocytoma		Synapse									plasma membrane					cytoplasm	nucleus	14.7142	2.8668	8	1	1.12505e-08	1	2.07358e-07	0.921875	0.000497945
P04085-2;P04085	Platelet-derived growth factor subunit A	PDGFA	+		+	24.3684	22.3324	21.7366												Nervous system disease	Central Nervous system neoplasm		Astrocytoma	Medulloblastoma											Golgi	endoplasmic reticulum		Organelli			1.70157	0.35776	1079	0.75	0.0794006	1	0.000157584	0.53125	0.603448
P04114	Apolipoprotein B-100;Apolipoprotein B-48	APOB	+	+	+	26.514	27.6237	29.0805												Nervous system disease	Central Nervous system neoplasm	epilepsy	Astrocytoma											plasma membrane		endoplasmic reticulum		Organelli	cytoplasm		3.93419	0.91054	561	0.671875	0.546143	0.75	0.0659088	0.53125	0.363493
P04156	Major prion protein	PRNP	+	+	+	28.2709	28.2972	29.156												Nervous system disease	Central Nervous system neoplasm	epilepsy	Astrocytoma		Synapse						CD230			plasma membrane	Golgi	endoplasmic reticulum		Organelli	cytoplasm		0.959875	0.18672	1306	0.515625	0.970745	0.734375	0.106236	0.710938	0.274777
P04179;P04179-4;P04179-2;P04179-3	Superoxide dismutase [Mn], mitochondrial	SOD2	+	+	+	25.4877	24.3718	22.3916												Nervous system disease	Central Nervous system neoplasm	epilepsy	Astrocytoma	Medulloblastoma													mitochondrion	Organelli			3.11407	0.71594	735	0.59375	0.265882	0.9375	0.000777569	0.796875	0.0535129
P04180	Phosphatidylcholine-sterol acyltransferase	LCAT	+		+	24.9687	22.2737	21.6044												Nervous system disease	Central Nervous system neoplasm	epilepsy	Astrocytoma																		3.25398	0.75624	705	0.796875	0.0192486	0.90625	8.18983e-05	0.546875	0.442348
P04196	Histidine-rich glycoprotein	HRG	+	+	+	29.9831	23.337	27.7443	+	+	+			+						Nervous system disease	Central Nervous system neoplasm		Astrocytoma									I25.022		plasma membrane							3.97919	0.92224	555	0.953125	0.000493753	0.796875	0.0190312	0.789062	0.0171583
P04211	Ig lambda chain V region 4A		+	+	+	26.9732	23.2165	27.862	+	+		+		+																				plasma membrane							3.57794	0.83558	636	0.96875	7.16638e-05	0.765625	0.122592	1	1.7923e-06
P04216	Thy-1 membrane glycoprotein	THY1	+	+	+	27.8026	26.884	24.9928												Nervous system disease	Central Nervous system neoplasm	epilepsy	Astrocytoma	Medulloblastoma							CD90			plasma membrane		endoplasmic reticulum		Organelli			1.51624	0.30263	1138	0.734375	0.203126	0.96875	1.34829e-05	0.8125	0.00458536
P04217;CON__Q2KJF1	Alpha-1B-glycoprotein	A1BG	+	+	+	32.4266	27.9509	24.261	+	+	+			+						Nervous system disease	Central Nervous system neoplasm	epilepsy	Astrocytoma									I43.950		plasma membrane							5.50441	1.2433	344	1	0.000215193	1	3.3678e-08	0.875	0.00498098
P04264	Keratin, type II cytoskeletal 1	KRT1	+	+	+	31.6137	31.3254	34.3842												Nervous system disease	Central Nervous system neoplasm	epilepsy	Astrocytoma																cytoplasm	nucleus	0.897758	0.17021	1329	0.546875	0.866217	0.8125	0.00485651	0.703125	0.117155
P04271	Protein S100-B	S100B	+	+	+	22.3701	29.1317	26.1023	+	+	+	+	+	+	+					Nervous system disease	Central Nervous system neoplasm	epilepsy	Astrocytoma	Medulloblastoma															cytoplasm	nucleus	9.24286	2.0344	83	1	5.12555e-07	0.859375	0.00677329	0.984375	0.00723341
P04275;P04275-2	von Willebrand factor;von Willebrand antigen 2	VWF	+	+	+	22.0911	20.7318	24.2225												Nervous system disease	Central Nervous system neoplasm	epilepsy	Astrocytoma	Medulloblastoma								I08.950				endoplasmic reticulum		Organelli			1.30135	0.26091	1196	0.6875	0.196323	0.671875	0.189255	0.804688	0.0142661
P04278;P04278-5;P04278-4;P04278-2;P04278-3	Sex hormone-binding globulin	SHBG	+	+	+	26.847	21.0676	23.1839	+	+	+			+						Nervous system disease	Central Nervous system neoplasm	epilepsy	Astrocytoma																		4.33292	0.98593	508	1	2.99362e-06	0.90625	0.00179454	0.8125	0.0272858
P04350	Tubulin beta-4A chain	TUBB4A		+	+	21.1889	25.52	22.9896	+	+				+						Nervous system disease	Central Nervous system neoplasm	epilepsy	Astrocytoma	Medulloblastoma															cytoplasm	nucleus	2.07398	0.46816	954	0.96875	5.23106e-05	0.625	0.157324	0.765625	0.0756067
P04406;P04406-2;O14556	Glyceraldehyde-3-phosphate dehydrogenase	GAPDH	+	+	+	29.1488	33.4064	31.9705	+	+	+			+						Nervous system disease	Central Nervous system neoplasm	epilepsy	Astrocytoma	Medulloblastoma										plasma membrane					cytoplasm	nucleus	4.42673	1.0047	494	1	2.15485e-07	0.984375	2.21305e-05	0.789062	0.0145589
P04430	Ig kappa chain V-I region BAN		+	+		24.2176	20.7703	21.7894	+	+				+																				plasma membrane							2.41255	0.56532	872	0.859375	0.00129174	0.8125	0.0261399	0.71875	0.0846396
P04439-2	HLA class I histocompatibility antigen, A-3 alpha chain	HLA-A	+	+	+	23.2288	27.2004	26.4185	+	+	+			+						Nervous system disease	Central Nervous system neoplasm		Astrocytoma	Medulloblastoma										plasma membrane	Golgi	endoplasmic reticulum		Organelli			4.12686	0.9467	536	0.96875	0.000310813	1	0.000712943	0.75	0.183208
P04632;Q96L46	Calpain small subunit 1	CAPNS1	+	+	+	23.8321	25.2874	23.7933												Nervous system disease	Central Nervous system neoplasm		Astrocytoma											plasma membrane							0.883527	0.16806	1336	0.734375	0.233591	0.5	0.965478	0.71875	0.160311
P04792	Heat shock protein beta-1	HSPB1	+	+	+	21.9026	27.4464	26.3893	+	+	+			+						Nervous system disease	Central Nervous system neoplasm	epilepsy	Astrocytoma	Medulloblastoma															cytoplasm	nucleus	3.97826	0.92003	556	1	2.46064e-07	0.953125	5.01777e-05	0.78125	0.0898779
P04839;Q9Y5S8-2;Q9Y5S8-3;Q9Y5S8	Cytochrome b-245 heavy chain	CYBB		+	+	20.6419	27.9111	25.8967	+	+	+	+	+	+	+					Nervous system disease	Central Nervous system neoplasm	epilepsy	Astrocytoma								CD200			plasma membrane	Golgi	endoplasmic reticulum		Organelli			12.959	2.738	15	1	3.20827e-09	1	2.67853e-07	0.953125	0.00106911
P04899;P04899-6;P04899-3;P04899-5;P04899-2;P04899-4;P19087;P11488;A8MTJ3;P38405-3	Guanine nucleotide-binding protein G(i) subunit alpha-2	GNAI2		+	+	21.3658	29.8305	27.9295	+	+	+			+						Nervous system disease	Central Nervous system neoplasm	epilepsy	Astrocytoma	Medulloblastoma	Synapse	Synaptosome	GABAergic synapse	Cholinergic synapse	Serotonergic synapse	Glutamatergic synapse				plasma membrane					cytoplasm		7.85601	1.7007	147	1	9.6598e-12	1	3.61067e-09	0.953125	0.000510538
P04921-2;P04921-3;P04921	Glycophorin-C	GYPC		+	+	21.4745	24.4579	22.2608	+	+				+						Nervous system disease	Central Nervous system neoplasm	epilepsy	Astrocytoma	Medulloblastoma							CD236			plasma membrane							1.49476	0.29726	1145	0.90625	0.00145213	0.640625	0.340463	0.796875	0.0430748
P05019-3;P05019-2;P05019-4;P05019	Insulin-like growth factor I	IGF1	+			23.1851	20.8683	21.0142	+	+	+			+						Nervous system disease	Central Nervous system neoplasm	epilepsy	Astrocytoma	Medulloblastoma																	2.43763	0.57211	866	1	2.74613e-05	0.9375	0.0020234	0.578125	0.782811
P05023-4;P05023;P05023-3;P05023-2;P20648	Sodium/potassium-transporting ATPase subunit alpha-1	ATP1A1	+	+	+	21.626	32.1276	29.3737	+	+	+			+			+			Nervous system disease	Central Nervous system neoplasm	epilepsy	Astrocytoma		Synapse									plasma membrane	Golgi	endoplasmic reticulum		Organelli			8.51288	1.8829	110	1	3.46954e-12	1	2.96462e-06	0.851562	0.0186989
P05026-2;P05026	Sodium/potassium-transporting ATPase subunit beta-1	ATP1B1		+	+	21.8842	28.9196	26.6354	+	+	+			+						Nervous system disease	Central Nervous system neoplasm		Astrocytoma											plasma membrane							6.5506	1.4458	240	1	3.6674e-10	0.78125	0.00411492	0.6875	0.123732
P05060	Secretogranin-1;PE-11;GAWK peptide;CCB peptide	CHGB	+	+	+	30.773	32.0352	26.1427												Nervous system disease	Central Nervous system neoplasm		Astrocytoma		Synapse											endoplasmic reticulum		Organelli			1.83777	0.39492	1029	0.703125	0.399724	0.65625	0.0355984	0.796875	0.0293608
P05067-11;P05067-8;P05067;P05067-7;P05067-9;P05067-4;P05067-6;P05067-10;P05067-3;P05067-5;P05067-2	Amyloid beta A4 protein;N-APP;Soluble APP-alpha;Soluble APP-beta;C99;Beta-amyloid protein 42;Beta-amyloid protein 40;C83;P3(42);P3(40);C80;Gamma-secretase C-terminal fragment 59;Gamma-secretase C-terminal fragment 57;Gamma-secretase C-terminal fragment 50;C31	APP	+	+	+	30.2865	31.0756	27.9973												Nervous system disease	Central Nervous system neoplasm	epilepsy	Astrocytoma		Synapse	Synaptosome			Serotonergic synapse			I02.015		plasma membrane	Golgi	endoplasmic reticulum	mitochondrion	Organelli	cytoplasm	nucleus	0.937759	0.18081	1314	0.53125	0.628914	0.625	0.21653	0.71875	0.212708
P05090	Apolipoprotein D	APOD	+	+	+	30.6546	28.5789	27.599												Nervous system disease	Central Nervous system neoplasm	epilepsy	Astrocytoma	Medulloblastoma												endoplasmic reticulum		Organelli	cytoplasm		3.43022	0.79374	665	0.75	0.0823271	0.953125	0.000137784	0.65625	0.393024
P05106;P05106-2;P05106-3	Integrin beta-3	ITGB3		+	+	22.5208	27.184	26.4341												Nervous system disease	Central Nervous system neoplasm	epilepsy	Astrocytoma	Medulloblastoma	Synapse						CD61			plasma membrane						nucleus	2.97954	0.67939	767	0.796875	0.0100813	0.921875	0.00183334	0.53125	0.681251
P05107	Integrin beta-2	ITGB2		+	+	21.7716	29.6855	27.2959	+	+	+	+	+	+	+					Nervous system disease	Central Nervous system neoplasm	epilepsy	Astrocytoma								CD18			plasma membrane							11.9404	2.5732	26	1	3.48705e-11	1	1.55582e-08	0.953125	0.000347393
P05109	Protein S100-A8;Protein S100-A8, N-terminally processed	S100A8	+	+	+	27.0513	29.6524	30.2291	+	+	+			+						Nervous system disease	Central Nervous system neoplasm	epilepsy	Astrocytoma											plasma membrane						nucleus	1.83312	0.39245	1032	0.84375	0.00563694	0.796875	0.0102686	0.625	0.628523
P05121-2;P05121	Plasminogen activator inhibitor 1	SERPINE1	+	+	+	22.7798	20.8649	24.098	+			+		+						Nervous system disease	Central Nervous system neoplasm	epilepsy	Astrocytoma	Medulloblastoma								I04.020		plasma membrane							2.33096	0.53981	895	0.78125	0.0642612	0.671875	0.271676	0.921875	0.000462228
P05154	Plasma serine protease inhibitor	SERPINA5	+	+	+	27.1378	21.4403	22.9795	+	+	+			+						Nervous system disease	Central Nervous system neoplasm	epilepsy	Astrocytoma									I04.004		plasma membrane							4.90485	1.1021	426	1	2.03383e-06	1	1.41097e-05	0.71875	0.126246
P05155-2;P05155;P05155-3;CON__P50448	Plasma protease C1 inhibitor	SERPING1	+	+	+	32.6507	29.2852	30.3641	+	+	+			+						Nervous system disease	Central Nervous system neoplasm		Astrocytoma									I04.024				endoplasmic reticulum		Organelli			8.00961	1.7462	140	1	3.33858e-06	1	1.80639e-06	0.765625	0.0580531
P05156;CON__Q32PI4	Complement factor I;Complement factor I heavy chain;Complement factor I light chain	CFI	+	+	+	29.9992	25.9508	27.3198	+	+	+			+						Nervous system disease	Central Nervous system neoplasm	epilepsy	Astrocytoma									S01.199									4.9243	1.1039	424	1	3.22591e-05	1	2.04251e-06	0.71875	0.0839201
P05160	Coagulation factor XIII B chain	F13B	+			23.8001	20.3719	21.1097	+	+	+			+						Nervous system disease	Central Nervous system neoplasm		Astrocytoma	Medulloblastoma																	4.14241	0.94954	533	0.96875	0.000234338	0.90625	0.0033482	0.671875	0.222817
P05164-2;P05164;P05164-3	Myeloperoxidase;Myeloperoxidase;89 kDa myeloperoxidase;84 kDa myeloperoxidase;Myeloperoxidase light chain;Myeloperoxidase heavy chain	MPO		+	+	21.6806	25.9686	29.6444	+	+	+	+	+	+	+					Nervous system disease	Central Nervous system neoplasm	epilepsy	Astrocytoma																	nucleus	9.48021	2.099	75	0.9375	0.000548286	1	9.04516e-07	0.828125	0.00928367
P05198	Eukaryotic translation initiation factor 2 subunit 1	EIF2S1			+	21.0619	21.7907	21.8604												Nervous system disease	Central Nervous system neoplasm	epilepsy	Astrocytoma	Medulloblastoma															cytoplasm	nucleus	0.266822	0.040322	1552	0.625	0.268898	0.65625	0.178641	0.578125	0.885221
P05362	Intercellular adhesion molecule 1	ICAM1		+	+	21.2177	22.3373	21.3654												Nervous system disease	Central Nervous system neoplasm	epilepsy	Astrocytoma								CD54			plasma membrane							0.589776	0.095548	1444	0.84375	0.0319564	0.53125	0.766906	0.796875	0.0985929
P05387;P05386-2	60S acidic ribosomal protein P2	RPLP2	+	+	+	22.1964	24.5895	22.5856												Nervous system disease																			cytoplasm		0.836698	0.15513	1347	0.828125	0.0549919	0.59375	0.728388	0.71875	0.136916
P05388;P05388-2;Q8NHW5	60S acidic ribosomal protein P0;60S acidic ribosomal protein P0-like	RPLP0;RPLP0P6	+	+	+	21.6233	24.1575	24.7337	+	+	+			+						Nervous system disease	Central Nervous system neoplasm	epilepsy	Astrocytoma		Synapse											endoplasmic reticulum		Organelli	cytoplasm	nucleus	3.54082	0.82785	640	0.9375	0.00244011	1	8.58182e-05	0.609375	0.390093
P05408	Neuroendocrine protein 7B2;N-terminal peptide;C-terminal peptide	SCG5	+		+	28.1269	26.8483	21.5112	+			+		+						Nervous system disease	Central Nervous system neoplasm	epilepsy	Astrocytoma	Medulloblastoma								I21.001								nucleus	5.16257	1.1684	383	0.75	0.200183	1	1.44305e-09	0.953125	0.000128986
P05413	Fatty acid-binding protein, heart	FABP3	+			24.4732	20.0933	20.5079	+	+	+			+						Nervous system disease	Central Nervous system neoplasm	epilepsy	Astrocytoma	Medulloblastoma																nucleus	6.30753	1.3763	266	1	7.76722e-05	0.96875	0.000269634	0.734375	0.146095
P05452;CON__Q2KIS7	Tetranectin	CLEC3B	+	+	+	30.1519	24.6367	29.7584	+	+		+		+						Nervous system disease																			cytoplasm		4.30638	0.97818	514	1	0.00074923	0.625	0.526205	0.921875	0.00262428
P05543;CON__Q9TT36	Thyroxine-binding globulin	SERPINA7	+		+	29.1216	21.4229	20.5598	+	+	+			+						Nervous system disease		epilepsy										I04.955									8.45572	1.8607	114	1	5.89428e-09	1	8.2812e-10	0.71875	0.153124
P05546;CON__ENSEMBL:ENSBTAP00000018574	Heparin cofactor 2	SERPIND1	+	+	+	30.5991	28.6211	29.3226												Nervous system disease												I04.019				endoplasmic reticulum		Organelli			0.49452	0.080794	1475	0.78125	0.0412625	0.921875	0.00370122	0.640625	0.430165
P05556;P05556-2;P05556-5;P05556-4;P05556-3	Integrin beta-1	ITGB1		+	+	21.7534	27.8183	25.9014	+	+	+			+						Nervous system disease	Central Nervous system neoplasm	epilepsy	Astrocytoma	Medulloblastoma	Synapse						CD29			plasma membrane					cytoplasm		6.65401	1.4778	232	1	2.65088e-07	0.921875	0.000145624	0.765625	0.0486833
P05997	Collagen alpha-2(V) chain	COL5A2	+	+	+	23.3259	23.7179	27.9949	+			+		+						Nervous system disease	Central Nervous system neoplasm		Astrocytoma													endoplasmic reticulum		Organelli			3.84851	0.88779	583	0.585938	0.67464	0.984375	0.0010667	0.96875	0.00197928
P06132	Uroporphyrinogen decarboxylase	UROD	+	+	+	21.9889	24.8393	24.9327												Nervous system disease																					1.09231	0.21471	1259	0.78125	0.0507009	0.828125	0.0205839	0.515625	0.952819
P06276	Cholinesterase	BCHE	+	+		24.8764	20.3824	23.6452	+	+		+		+						Nervous system disease	Central Nervous system neoplasm	epilepsy	Astrocytoma		Synapse							S09.980		plasma membrane		endoplasmic reticulum		Organelli			3.76534	0.87275	598	1	8.91549e-06	0.703125	0.211073	0.953125	0.000879836
P06307	Cholecystokinin;Cholecystokinin-58;Cholecystokinin-58 desnonopeptide;Cholecystokinin-39;Cholecystokinin-33;Cholecystokinin-25;Cholecystokinin-18;Cholecystokinin-12;Cholecystokinin-8;Cholecystokinin-7;Cholecystokinin-5	CCK	+	+	+	24.233	24.3652	22.5118												Nervous system disease	Central Nervous system neoplasm	epilepsy	Astrocytoma	Medulloblastoma	Synapse																0.829676	0.15056	1351	0.515625	0.903306	0.765625	0.0804444	0.703125	0.105173
P06310;A0A075B6S6	Ig kappa chain V-II region RPMI 6410	IGKV2D-30	+	+	+	25.2066	21.1847	24.1876	+	+		+		+																				plasma membrane							2.60287	0.60636	830	1	2.53602e-06	0.625	0.302206	0.875	0.00424833
P06312	Ig kappa chain V-IV region	IGKV4-1	+	+	+	28.6065	23.7649	28.3337	+	+				+																				plasma membrane							5.18365	1.1702	382	0.984375	9.73052e-05	0.640625	0.624084	0.984375	0.000135837
P06331	Ig heavy chain V-II region ARH-77		+			24.0943	20.3322	21.9379	+	+				+																				plasma membrane							2.34867	0.54927	888	0.890625	0.00142002	0.78125	0.06205	0.84375	0.0237304
P06396;P06396-3;REV__Q6TDU7-4;REV__Q6TDU7-2;REV__Q6TDU7-3;REV__Q6TDU7	Gelsolin	GSN	+	+	+	32.8168	31.3125	31.3077												Nervous system disease	Central Nervous system neoplasm	epilepsy	Astrocytoma											plasma membrane					cytoplasm		1.95841	0.436	983	0.75	0.0206492	0.9375	0.000261833	0.507812	0.994028
P06396-2	Gelsolin	GSN	+	+	+	22.293	23.7098	24.6702												Nervous system disease	Central Nervous system neoplasm		Astrocytoma											plasma membrane					cytoplasm		1.64313	0.34066	1099	0.734375	0.117822	0.796875	0.0218409	0.71875	0.184296
P06454-2;P06454	Prothymosin alpha;Prothymosin alpha, N-terminally processed;Thymosin alpha-1	PTMA	+	+	+	21.7843	22.5654	22.6895												Nervous system disease																				nucleus	0.082508	0.0098446	1605	0.53125	0.494715	0.625	0.33354	0.5	0.926803
P06576	ATP synthase subunit beta, mitochondrial	ATP5B	+	+	+	22.7451	24.4761	25.9748												Nervous system disease	Central Nervous system neoplasm		Astrocytoma											plasma membrane			mitochondrion	Organelli		nucleus	2.88234	0.66445	779	0.640625	0.197581	1	0.000288939	0.695312	0.255197
P06681;P06681-3;P06681-2	Complement C2;Complement C2b fragment;Complement C2a fragment	C2	+	+	+	29.8571	25.0715	25.2404	+	+	+			+						Nervous system disease	Central Nervous system neoplasm		Astrocytoma									S01.194		plasma membrane							4.93308	1.1093	420	1	8.68319e-07	1	6.68593e-10	0.53125	0.784784
P06702	Protein S100-A9	S100A9	+	+	+	27.8029	31.7079	31.5441	+	+	+			+						Nervous system disease	Central Nervous system neoplasm		Astrocytoma											plasma membrane					cytoplasm	nucleus	3.00829	0.68835	761	1	0.000704251	0.78125	0.00939967	0.546875	0.886892
P06703	Protein S100-A6	S100A6	+	+	+	25.308	25.4836	24.5714												Nervous system disease	Central Nervous system neoplasm	epilepsy	Astrocytoma	Medulloblastoma										plasma membrane					cytoplasm	nucleus	1.32823	0.2661	1191	0.59375	0.894395	0.515625	0.435364	0.671875	0.525226
P06727;REV__Q8NBT2;O94964-2	Apolipoprotein A-IV	APOA4	+	+	+	32.0175	29.7545	28.3278												Nervous system disease	Central Nervous system neoplasm	epilepsy	Astrocytoma													endoplasmic reticulum		Organelli			4.03192	0.9358	546	0.78125	0.120265	0.96875	5.77671e-05	0.828125	0.292539
P06732	Creatine kinase M-type;Creatine kinase M-type, N-terminally processed	CKM		+	+	21.1018	25.3845	22.1529	+	+		+		+						Nervous system disease	Central Nervous system neoplasm																				3.65261	0.85721	618	0.984375	1.00487e-05	0.65625	0.22794	0.859375	0.00430653
P06733;P06733-2	Alpha-enolase	ENO1	+	+	+	29.2155	30.5287	30.2234												Nervous system disease	Central Nervous system neoplasm	epilepsy	Astrocytoma											plasma membrane					cytoplasm	nucleus	0.498169	0.081486	1473	0.78125	0.0518015	0.734375	0.0791944	0.609375	0.632348
P06737-2;P06737	Glycogen phosphorylase, liver form	PYGL		+	+	21.3764	21.9608	24.8421												Nervous system disease	Central Nervous system neoplasm		Astrocytoma																cytoplasm		1.69877	0.35634	1080	0.625	0.305885	0.875	0.0103926	0.8125	0.028894
P06744;P06744-2;Q8N196	Glucose-6-phosphate isomerase	GPI	+	+	+	26.4247	27.3774	26.1771												Nervous system disease	Central Nervous system neoplasm	epilepsy	Astrocytoma	Medulloblastoma											Golgi			Organelli		nucleus	7.33477	1.6211	177	0.8125	0.117646	0.5625	0.751955	0.703125	0.0755843
P06748;P06748-2;P06748-3	Nucleophosmin	NPM1	+	+	+	21.5037	25.3695	22.4318	+	+				+						Nervous system disease	Central Nervous system neoplasm		Astrocytoma																cytoplasm	nucleus	2.12877	0.48538	942	0.953125	0.00344479	0.640625	0.292878	0.84375	0.0396608
P06753-6	Tropomyosin alpha-3 chain	TPM3	+	+	+	25.7843	26.1169	22.5367	+			+		+						Nervous system disease	Central Nervous system neoplasm		Astrocytoma	Medulloblastoma																	2.0647	0.46739	956	0.53125	0.731051	0.859375	0.0106678	0.9375	0.000452449
P06756-3;P06756-2;P06756	Integrin alpha-V;Integrin alpha-V heavy chain;Integrin alpha-V light chain	ITGAV		+	+	21.5103	24.4221	22.0465	+	+				+						Nervous system disease	Central Nervous system neoplasm		Astrocytoma	Medulloblastoma							CD51			plasma membrane							3.30894	0.77114	690	0.9375	0.000737316	0.609375	0.415943	0.890625	0.00634331
P06865;P06865-2	Beta-hexosaminidase subunit alpha	HEXA	+	+	+	25.5678	21.2842	24.9461	+	+				+						Nervous system disease	Central Nervous system neoplasm	epilepsy	Astrocytoma																		6.44841	1.4286	249	1	5.00122e-07	0.609375	0.338045	0.984375	0.0001005
P07093-2;P07093-3	Glia-derived nexin	SERPINE2	+	+	+	25.6553	24.0277	26.7968	+	+				+						Nervous system disease	Central Nervous system neoplasm		Astrocytoma	Medulloblastoma								I04.021									1.75995	0.37199	1055	0.867188	0.00617307	0.6875	0.0787063	0.90625	0.00134439
P07099	Epoxide hydrolase 1	EPHX1			+	20.5837	22.4044	21.1126	+	+				+						Nervous system disease	Central Nervous system neoplasm		Astrocytoma	Medulloblastoma								S33.971				endoplasmic reticulum		Organelli			1.20986	0.23557	1229	0.921875	0.00277853	0.609375	0.340929	0.75	0.0471708
P07108;P07108-3;P07108-2;P07108-4;P07108-5	Acyl-CoA-binding protein	DBI	+	+	+	27.3459	27.1798	23.6867	+			+		+						Nervous system disease	Central Nervous system neoplasm		Astrocytoma	Medulloblastoma											Golgi	endoplasmic reticulum		Organelli			7.29024	1.6078	180	0.53125	0.768691	1	0.000405946	0.96875	0.00175832
P07195;Q6ZMR3;P07864	L-lactate dehydrogenase B chain	LDHB	+	+	+	29.4964	28.5057	29.7789	+	+				+						Nervous system disease	Central Nervous system neoplasm	epilepsy	Astrocytoma	Medulloblastoma													mitochondrion	Organelli	cytoplasm	nucleus	2.0223	0.45731	968	0.859375	0.0219374	0.546875	0.640846	0.75	0.0421692
P07196	Neurofilament light polypeptide	NEFL	+		+	22.7747	21.5216	20.4889												Nervous system disease	Central Nervous system neoplasm	epilepsy	Astrocytoma	Medulloblastoma	Synapse														cytoplasm		1.03035	0.20171	1279	0.71875	0.30149	0.8125	0.0365458	0.59375	0.340016
P07203;P07203-2	Glutathione peroxidase 1	GPX1		+	+	22.0723	24.2575	23.8182	+	+				+						Nervous system disease	Central Nervous system neoplasm	epilepsy	Astrocytoma														mitochondrion	Organelli	cytoplasm	nucleus	1.03931	0.20313	1277	0.859375	0.0165181	0.703125	0.0868631	0.578125	0.710671
P07225;CON__P07224	Vitamin K-dependent protein S	PROS1	+	+	+	29.2772	30.3403	29.958												Nervous system disease	Central Nervous system neoplasm	epilepsy	Astrocytoma											plasma membrane	Golgi	endoplasmic reticulum		Organelli			0.391371	0.063278	1512	0.75	0.422558	0.523438	0.332388	0.578125	0.795176
P07237	Protein disulfide-isomerase	P4HB	+	+	+	23.3308	26.3465	23.6451	+	+		+		+						Nervous system disease	Central Nervous system neoplasm		Astrocytoma											plasma membrane	Golgi	endoplasmic reticulum		Organelli			2.40682	0.55862	876	0.890625	0.00112154	0.5625	0.670119	0.9375	0.00243308
P07333;P07333-2;REV__Q96M29	Macrophage colony-stimulating factor 1 receptor	CSF1R	+		+	28.0612	23.3491	21.8544	+	+	+			+						Nervous system disease	Central Nervous system neoplasm	epilepsy	Astrocytoma	Medulloblastoma							CD115		CSF1R	plasma membrane							7.56929	1.6571	166	1	5.15582e-07	1	1.98435e-10	0.796875	0.0263757
P07339	Cathepsin D;Cathepsin D light chain;Cathepsin D heavy chain	CTSD	+	+	+	30.3043	27.3446	28.4179	+	+	+			+						Nervous system disease	Central Nervous system neoplasm	epilepsy	Astrocytoma	Medulloblastoma								A01.009									0.972186	0.18938	1300	0.890625	0.0159749	0.84375	0.0177299	0.625	0.364453
P07355;P07355-2	Annexin A2	ANXA2	+	+	+	23.9071	32.3002	29.4109	+	+	+	+	+	+	+	+				Nervous system disease	Central Nervous system neoplasm		Astrocytoma											plasma membrane					cytoplasm	nucleus	14.9424	3.0456	5	1	7.44313e-10	1	2.95264e-06	1	0.000119426
P07357	Complement component C8 alpha chain	C8A	+	+	+	27.6263	25.4859	28.6042	+	+				+						Nervous system disease																					5.59971	1.265	331	0.890625	0.0109278	0.742188	0.0924202	1	0.000307718
P07358	Complement component C8 beta chain	C8B	+	+	+	28.8311	25.7253	28.9651	+	+				+						Nervous system disease																					2.229	0.51926	913	0.9375	0.00577134	0.515625	0.724198	0.984375	0.00363412
P07360	Complement component C8 gamma chain	C8G	+	+	+	27.7218	25.444	27.8466	+	+				+																											1.39128	0.27664	1177	0.921875	0.00283691	0.59375	0.790569	1	0.000148702
P07384	Calpain-1 catalytic subunit	CAPN1	+	+	+	22.6472	26.351	23.6512	+	+				+						Nervous system disease	Central Nervous system neoplasm	epilepsy	Astrocytoma									C02.001		plasma membrane			mitochondrion	Organelli	cytoplasm		1.88159	0.41285	1013	0.859375	0.0122594	0.65625	0.399954	0.78125	0.0482222
P07437	Tubulin beta chain	TUBB	+	+	+	21.7191	27.1444	24.406	+	+				+						Nervous system disease	Central Nervous system neoplasm	epilepsy	Astrocytoma	Medulloblastoma															cytoplasm	nucleus	3.62633	0.85402	623	1	8.91339e-06	0.734375	0.0320386	0.75	0.0391648
P07492-2;P07492-3;P07492	Gastrin-releasing peptide;Neuromedin-C	GRP	+		+	22.9004	21.2107	21.2057	+	+	+			+						Nervous system disease	Central Nervous system neoplasm	epilepsy	Astrocytoma																		2.80813	0.64824	797	0.9375	0.00182981	0.875	0.00690337	0.546875	0.990345
P07585;P07585-2;P07585-4;P07585-3;P07585-5	Decorin	DCN	+	+	+	23.0513	22.174	26.4077												Nervous system disease	Central Nervous system neoplasm	epilepsy	Astrocytoma												Golgi			Organelli			3.39013	0.78535	671	0.625	0.499023	0.765625	0.039931	0.859375	0.0145536
P07602;P07602-2	Prosaposin;Saposin-A;Saposin-B-Val;Saposin-B;Saposin-C;Saposin-D	PSAP	+		+	27.7851	23.2069	21.13	+	+	+			+						Nervous system disease	Central Nervous system neoplasm	epilepsy	Astrocytoma											plasma membrane							7.87289	1.7026	145	0.9375	0.000415352	1	5.74918e-08	0.84375	0.0282609
P07686;REV__P06733-2;REV__P13929-3;REV__P13929-2;REV__P13929;REV__P06733	Beta-hexosaminidase subunit beta;Beta-hexosaminidase subunit beta chain B;Beta-hexosaminidase subunit beta chain A	HEXB	+	+	+	24.9814	23.7043	25.6252	+			+		+						Nervous system disease		epilepsy																			2.50616	0.58822	853	0.875	0.125806	0.609375	0.410025	0.953125	0.000207539
P07711;Q5NE16;O60911	Cathepsin L1;Cathepsin L1 heavy chain;Cathepsin L1 light chain	CTSL	+		+	26.2211	20.9632	21.8575	+	+	+			+						Nervous system disease	Central Nervous system neoplasm	epilepsy	Astrocytoma									C01.009;C01.032;I29.001		plasma membrane	Golgi			Organelli		nucleus	6.0222	1.3243	291	1	1.38958e-07	1	5.27824e-05	0.632812	0.264995
P07737	Profilin-1	PFN1	+	+	+	28.0934	27.3711	26.657	+			+		+						Nervous system disease	Central Nervous system neoplasm		Astrocytoma																cytoplasm	nucleus	1.55987	0.31647	1127	0.875	0.134308	0.875	0.00850153	0.875	0.00523857
P07738	Bisphosphoglycerate mutase	BPGM	+	+	+	25.3348	26.8804	24.6896																																	1.67943	0.35079	1085	0.609375	0.377975	0.515625	0.68143	0.703125	0.248048
P07858	Cathepsin B;Cathepsin B light chain;Cathepsin B heavy chain	CTSB	+	+	+	27.3589	24.1914	26.9019	+	+				+						Nervous system disease	Central Nervous system neoplasm	epilepsy	Astrocytoma	Medulloblastoma								C01.060		plasma membrane					cytoplasm		1.17298	0.22983	1240	0.890625	0.00723012	0.53125	0.720357	0.71875	0.0857087
P07900;P07900-2;Q14568;Q58FG0;Q58FG1	Heat shock protein HSP 90-alpha	HSP90AA1	+	+	+	26.709	31.6918	29.5669	+	+	+	+	+	+	+					Nervous system disease	Central Nervous system neoplasm	epilepsy	Astrocytoma											plasma membrane			mitochondrion	Organelli	cytoplasm	nucleus	9.46796	2.0966	76	1	5.22099e-06	0.914062	0.0021476	0.867188	0.00371666
P07910-2;P07910;P07910-4;P07910-3;Q86SE5-2	Heterogeneous nuclear ribonucleoproteins C1/C2	HNRNPC	+	+	+	22.0433	22.885	21.9988												Nervous system disease	Central Nervous system neoplasm		Astrocytoma	Medulloblastoma																nucleus	0.0747146	0.0073936	1607	0.546875	0.450942	0.601562	0.962889	0.640625	0.485328
P07942	Laminin subunit beta-1	LAMB1	+	+		23.939	21.0902	28.7694	+	+	+	+	+	+	+	+				Nervous system disease	Central Nervous system neoplasm	epilepsy	Astrocytoma													endoplasmic reticulum		Organelli	cytoplasm		14.9207	2.9895	6	1	1.79169e-05	1	0.000105199	1	2.24786e-07
P07948-2;P07948	Tyrosine-protein kinase Lyn	LYN		+	+	21.1391	25.5537	23.4408	+	+				+						Nervous system disease	Central Nervous system neoplasm	epilepsy	Astrocytoma		Synapse								LYN	plasma membrane	Golgi			Organelli	cytoplasm	nucleus	3.13517	0.72077	732	1	1.07567e-06	0.71875	0.0546255	0.703125	0.0815547
P07996;P07996-2	Thrombospondin-1	THBS1	+	+	+	26.6835	25.5646	28.9752	+			+		+						Nervous system disease	Central Nervous system neoplasm	epilepsy	Astrocytoma	Medulloblastoma										plasma membrane		endoplasmic reticulum		Organelli			1.21298	0.23632	1227	0.625	0.182322	0.796875	0.0489584	0.875	0.0047275
P07998	Ribonuclease pancreatic	RNASE1	+	+		25.611	20.6662	23.3124	+	+				+						Nervous system disease	Central Nervous system neoplasm	epilepsy	Astrocytoma																		7.043	1.5727	195	0.875	0.000396947	0.734375	0.122089	0.90625	0.0122811
P08123	Collagen alpha-2(I) chain	COL1A2	+	+	+	27.0271	26.7523	31.7133												Nervous system disease	Central Nervous system neoplasm	epilepsy	Astrocytoma	Medulloblastoma												endoplasmic reticulum		Organelli			2.22194	0.51371	917	0.5625	0.849963	0.921875	0.0020351	0.84375	0.0120245
P08133;P08133-2	Annexin A6	ANXA6		+	+	20.9773	31.4513	29.3532	+	+	+			+			+	+		Nervous system disease	Central Nervous system neoplasm		Astrocytoma														mitochondrion	Organelli	cytoplasm		8.98408	1.9882	94	1	1.33448e-13	1	7.91603e-12	0.953125	0.00057566
P08185	Corticosteroid-binding globulin	SERPINA6	+		+	29.32	23.3547	21.2198	+	+	+			+				+		Nervous system disease	Central Nervous system neoplasm		Astrocytoma									I04.954									7.57281	1.6576	165	1	2.04861e-06	1	2.84899e-14	0.875	0.0126178
P08195-2;P08195-3;P08195;P08195-4	4F2 cell-surface antigen heavy chain	SLC3A2	+	+	+	22.3174	29.8205	26.5585	+	+	+			+						Nervous system disease	Central Nervous system neoplasm		Astrocytoma								CD98			plasma membrane							6.45989	1.4348	247	1	7.32357e-10	1	1.17106e-05	0.984375	9.51517e-05
P08237;P08237-3;P08237-2	ATP-dependent 6-phosphofructokinase, muscle type	PFKM		+	+	21.4145	25.5367	22.8623	+	+				+						Nervous system disease	Central Nervous system neoplasm		Astrocytoma											plasma membrane						nucleus	5.11456	1.1628	388	1	1.07149e-06	0.765625	0.0633033	0.9375	0.00130179
P08238;Q58FF7	Heat shock protein HSP 90-beta	HSP90AB1	+	+	+	22.0157	29.1282	27.7645	+	+	+			+						Nervous system disease	Central Nervous system neoplasm	epilepsy	Astrocytoma	Medulloblastoma										plasma membrane			mitochondrion	Organelli	cytoplasm	nucleus	4.99553	1.1212	411	1	5.09608e-05	0.984375	0.000375815	0.875	0.0757393
P08253;P08253-3	72 kDa type IV collagenase;PEX	MMP2	+	+	+	28.8279	22.5314	23.8711	+	+	+			+						Nervous system disease	Central Nervous system neoplasm	epilepsy	Astrocytoma	Medulloblastoma								M10.003		plasma membrane			mitochondrion	Organelli		nucleus	3.52605	0.82571	643	0.984375	4.43762e-05	0.9375	0.000612727	0.671875	0.386159
P08294	Extracellular superoxide dismutase [Cu-Zn]	SOD3	+	+	+	28.6854	27.4498	26.4761												Nervous system disease	Central Nervous system neoplasm	epilepsy													Golgi			Organelli		nucleus	0.288075	0.048034	1538	0.601562	0.36626	0.75	0.111448	0.625	0.558878
P08397-2;P08397;P08397-4;P08397-3	Porphobilinogen deaminase	HMBS	+	+	+	22.9496	20.9937	23.8404	+	+		+		+						Nervous system disease	Central Nervous system neoplasm	epilepsy	Astrocytoma	Medulloblastoma															cytoplasm		1.35667	0.26857	1187	0.875	0.0204615	0.5625	0.417536	0.859375	0.00775166
P08493;P08493-2	Matrix Gla protein	MGP	+	+	+	23.341	26.2535	25.8981												Nervous system disease	Central Nervous system neoplasm	epilepsy	Astrocytoma	Medulloblastoma																	1.15783	0.22709	1244	0.742188	0.0515416	0.75	0.0509853	0.578125	0.810138
P08514;P08514-2;P08514-3	Integrin alpha-IIb;Integrin alpha-IIb heavy chain;Integrin alpha-IIb light chain, form 1;Integrin alpha-IIb light chain, form 2	ITGA2B		+	+	21.3027	26.1685	25.6341												Nervous system disease	Central Nervous system neoplasm	epilepsy	Astrocytoma								CD41			plasma membrane							2.73398	0.63432	810	0.78125	0.0113103	0.796875	0.00781957	0.5625	0.803933
P08567	Pleckstrin	PLEK	+	+	+	23.0347	26.2372	24.5731	+	+				+						Nervous system disease	Central Nervous system neoplasm		Astrocytoma											plasma membrane					cytoplasm		1.78659	0.37795	1049	0.8125	0.0168756	0.75	0.0734264	0.65625	0.197606
P08571	Monocyte differentiation antigen CD14;Monocyte differentiation antigen CD14, urinary form;Monocyte differentiation antigen CD14, membrane-bound form	CD14	+	+	+	31.8265	29.6773	29.7541	+	+	+			+						Nervous system disease	Central Nervous system neoplasm		Astrocytoma								CD14			plasma membrane	Golgi			Organelli			1.84538	0.39664	1027	0.96875	0.000115509	0.96875	0.000723364	0.53125	0.889255
P08572	Collagen alpha-2(IV) chain;Canstatin	COL4A2	+	+	+	23.8534	21.1347	30.6519	+	+	+	+	+	+	+				+	Nervous system disease	Central Nervous system neoplasm	epilepsy	Astrocytoma													endoplasmic reticulum		Organelli			13.4875	2.7927	11	0.875	0.00830935	1	7.16526e-07	1	2.80343e-09
P08575-4;P08575-9;P08575-10;P08575-8;P08575-7;P08575-5;P08575-6;P08575	Receptor-type tyrosine-protein phosphatase C	PTPRC		+	+	21.6092	29.7146	26.7938	+	+	+			+						Nervous system disease	Central Nervous system neoplasm	epilepsy	Astrocytoma	Medulloblastoma							CD45			plasma membrane					cytoplasm		7.51018	1.6359	170	1	8.47642e-10	1	3.07293e-06	0.90625	0.000249589
P08582;P08582-2	Melanotransferrin	MFI2			+	20.7669	24.4716	21.8226	+	+				+						Nervous system disease	Central Nervous system neoplasm		Astrocytoma								CD228	S60.973		plasma membrane		endoplasmic reticulum		Organelli			3.28708	0.76243	698	1	0.000424423	0.796875	0.0499856	0.921875	0.00871684
P08603;P08603-2	Complement factor H	CFH	+	+	+	30.9473	27.8167	32.5775	+	+	+			+						Nervous system disease	Central Nervous system neoplasm	epilepsy	Astrocytoma																		5.39508	1.2102	360	0.859375	0.0165888	0.960938	0.00255299	1	0.00112664
P08637	Low affinity immunoglobulin gamma Fc region receptor III-A	FCGR3A	+		+	26.4243	21.5072	21.5663	+	+	+			+						Nervous system disease		epilepsy									CD16a			plasma membrane							6.79333	1.5065	221	1	5.65449e-08	1	1.16122e-07	0.5625	0.924397
P08648	Integrin alpha-5;Integrin alpha-5 heavy chain;Integrin alpha-5 light chain	ITGA5		+	+	22.0333	24.3633	22.0984	+	+				+						Nervous system disease	Central Nervous system neoplasm		Astrocytoma	Medulloblastoma							CD49e			plasma membrane	Golgi	endoplasmic reticulum		Organelli	cytoplasm		0.788404	0.13562	1373	0.890625	0.00436556	0.515625	0.916644	0.828125	0.0139302
P08670;P41219;P41219-2	Vimentin	VIM	+	+	+	29.3099	27.6716	25.203	+	+	+			+						Nervous system disease	Central Nervous system neoplasm	epilepsy	Astrocytoma	Medulloblastoma										plasma membrane					cytoplasm		2.2735	0.5312	903	0.859375	0.0200185	0.96875	0.00117919	0.78125	0.0288688
P08697;P08697-2;CON__P28800	Alpha-2-antiplasmin	SERPINF2	+	+	+	31.4223	30.3703	30.3951												Nervous system disease	Central Nervous system neoplasm		Astrocytoma									I04.023									4.04952	0.93761	544	0.765625	0.0746506	0.8125	0.0124641	0.5	0.968197
P08709-2;P08709	Coagulation factor VII;Factor VII light chain;Factor VII heavy chain	F7		+	+	21.5653	24.661	24.5358	+	+	+			+						Nervous system disease	Central Nervous system neoplasm	epilepsy										S01.215		plasma membrane	Golgi	endoplasmic reticulum		Organelli			1.57382	0.32105	1124	0.828125	0.0202969	0.921875	0.00352313	0.546875	0.929305
P08754	Guanine nucleotide-binding protein G(k) subunit alpha	GNAI3		+	+	21.2706	23.0076	23.457	+	+	+			+						Nervous system disease	Central Nervous system neoplasm		Astrocytoma		Synapse	Synaptosome	GABAergic synapse	Cholinergic synapse	Serotonergic synapse	Glutamatergic synapse				plasma membrane	Golgi			Organelli	cytoplasm		1.40276	0.27817	1173	0.859375	0.00918635	0.84375	0.0173017	0.546875	0.601935
P08758	Annexin A5	ANXA5	+	+	+	21.9635	30.9703	28.2071	+	+	+	+	+	+	+	+			+	Nervous system disease	Central Nervous system neoplasm	epilepsy	Astrocytoma	Medulloblastoma										plasma membrane					cytoplasm		16.0426	3.1459	3	1	1.02741e-09	1	4.19558e-07	1	1.426e-05
P08949-2;P08949	Neuromedin-B;Neuromedin-B-32;Neuromedin-B	NMB	+		+	21.9851	23.2951	21.6081												Nervous system disease	Central Nervous system neoplasm		Astrocytoma	Medulloblastoma																	0.841087	0.15549	1346	0.6875	0.199524	0.546875	0.555729	0.734375	0.0958643
P08962;P08962-2;P08962-3	CD63 antigen	CD63		+	+	20.6293	24.3487	25.9463	+	+	+			+						Nervous system disease	Central Nervous system neoplasm	epilepsy	Astrocytoma								CD63			plasma membrane							4.6495	1.0459	464	0.984375	8.37317e-05	1	1.95228e-08	0.765625	0.046329
P09104;P09104-2	Gamma-enolase	ENO2	+	+	+	25.7969	25.4025	23.6248												Nervous system disease	Central Nervous system neoplasm	epilepsy	Astrocytoma	Medulloblastoma	Synapse									plasma membrane							1.19986	0.23478	1233	0.609375	0.670459	0.859375	0.00931094	0.6875	0.0839745
P09211	Glutathione S-transferase P	GSTP1	+	+	+	27.6338	28.5367	27.1453												Nervous system disease	Central Nervous system neoplasm	epilepsy	Astrocytoma	Medulloblastoma													mitochondrion	Organelli	cytoplasm	nucleus	1.27723	0.25421	1206	0.796875	0.0400304	0.578125	0.603314	0.765625	0.135385
P09382	Galectin-1	LGALS1	+	+	+	25.8493	26.7347	25.6539												Nervous system disease	Central Nervous system neoplasm	epilepsy	Astrocytoma	Medulloblastoma												endoplasmic reticulum		Organelli	cytoplasm		0.467677	0.075798	1485	0.65625	0.153999	0.71875	0.802082	0.804688	0.0740839
P09429;B2RPK0	High mobility group protein B1;Putative high mobility group protein B1-like 1	HMGB1;HMGB1P1			+	21.6768	25.7968	21.0547	+	+		+		+					+	Nervous system disease	Central Nervous system neoplasm	epilepsy	Astrocytoma												Golgi	endoplasmic reticulum		Organelli		nucleus	6.72294	1.4931	227	1	8.66795e-05	0.640625	0.346889	1	1.06623e-05
P09455;P09455-2;P09455-3	Retinol-binding protein 1	RBP1		+	+	21.9327	25.5145	24.3796	+	+				+						Nervous system disease	Central Nervous system neoplasm		Astrocytoma	Medulloblastoma																nucleus	1.47996	0.29298	1153	0.984375	0.000579941	0.640625	0.0715981	0.5625	0.413425
P09471-2;P09471	Guanine nucleotide-binding protein G(o) subunit alpha	GNAO1		+	+	20.7429	24.8772	22.629	+	+				+						Nervous system disease	Central Nervous system neoplasm	epilepsy	Astrocytoma		Synapse	Synaptosome	GABAergic synapse	Cholinergic synapse	Serotonergic synapse	Glutamatergic synapse				plasma membrane							4.51031	1.0194	480	1	9.29683e-06	0.710938	0.0510758	0.765625	0.0423685
P09486	SPARC	SPARC	+	+	+	29.7354	24.9231	23.0081	+	+	+			+						Nervous system disease	Central Nervous system neoplasm	epilepsy	Astrocytoma	Medulloblastoma										plasma membrane					cytoplasm		5.07827	1.1486	396	0.96875	0.000170628	1	7.86849e-08	0.71875	0.0732262
P09525	Annexin A4	ANXA4		+	+	21.2213	28.0957	26.4521	+	+	+			+						Nervous system disease	Central Nervous system neoplasm													plasma membrane					cytoplasm	nucleus	8.10507	1.7655	130	1	3.51134e-10	0.921875	5.00068e-05	0.742188	0.111034
P09529	Inhibin beta B chain	INHBB				21.7696	21.0695	21.9754												Nervous system disease																			cytoplasm		2.34227	0.54202	892	0.703125	0.180313	0.578125	0.744109	0.8125	0.0569134
P09543;P09543-2	2,3-cyclic-nucleotide 3-phosphodiesterase	CNP		+	+	21.2778	26.5033	23.8161	+	+				+						Nervous system disease	Central Nervous system neoplasm	epilepsy	Astrocytoma		Synapse									plasma membrane					cytoplasm		3.34624	0.77845	680	1	8.36348e-07	0.75	0.0308733	0.765625	0.0378172
P09603;P09603-2;P09603-3	Macrophage colony-stimulating factor 1;Processed macrophage colony-stimulating factor 1	CSF1	+			25.818	20.9148	20.9741	+	+	+			+						Nervous system disease	Central Nervous system neoplasm		Astrocytoma	Medulloblastoma										plasma membrane		endoplasmic reticulum		Organelli	cytoplasm		7.75495	1.6793	154	1	6.21631e-10	1	2.87103e-09	0.507812	0.852899
P09619;P09619-2	Platelet-derived growth factor receptor beta	PDGFRB		+	+	21.3632	23.59	22.3487												Nervous system disease	Central Nervous system neoplasm	epilepsy	Astrocytoma	Medulloblastoma							CD140b		PDGFRB	plasma membrane	Golgi			Organelli	cytoplasm	nucleus	0.806927	0.14323	1361	0.875	0.0396023	0.625	0.210138	0.6875	0.310124
P09651-2;P09651-3;P09651;Q32P51	Heterogeneous nuclear ribonucleoprotein A1;Heterogeneous nuclear ribonucleoprotein A1, N-terminally processed;Heterogeneous nuclear ribonucleoprotein A1-like 2	HNRNPA1;HNRNPA1L2	+	+	+	22.2401	23.5121	22.1287												Nervous system disease	Central Nervous system neoplasm		Astrocytoma																cytoplasm	nucleus	2.83678	0.65422	788	0.75	0.0939075	0.539062	0.890695	0.765625	0.0949304
P09668	Pro-cathepsin H;Cathepsin H mini chain;Cathepsin H;Cathepsin H heavy chain;Cathepsin H light chain	CTSH	+	+	+	23.7616	23.0827	24.4781												Nervous system disease	Central Nervous system neoplasm		Astrocytoma									C01.040							cytoplasm		0.80711	0.14332	1360	0.75	0.509428	0.53125	0.49548	0.78125	0.126698
P09871	Complement C1s subcomponent;Complement C1s subcomponent heavy chain;Complement C1s subcomponent light chain	C1S	+	+	+	30.4392	27.0092	33.5232	+	+	+	+	+	+	+					Nervous system disease	Central Nervous system neoplasm	epilepsy	Astrocytoma									S01.193									9.41687	2.0892	78	0.945312	0.00866106	1	8.58723e-08	1	5.67102e-05
P09936	Ubiquitin carboxyl-terminal hydrolase isozyme L1	UCHL1	+		+	23.1037	25.8073	22.1753	+	+				+						Nervous system disease	Central Nervous system neoplasm	epilepsy	Astrocytoma	Medulloblastoma	Synapse							C12.001				endoplasmic reticulum		Organelli	cytoplasm		4.90981	1.1039	425	0.84375	0.0207941	0.625	0.421349	0.90625	0.00295846
P09960;P09960-4;P09960-2;P09960-3	Leukotriene A-4 hydrolase	LTA4H	+	+	+	22.3478	24.1936	27.4577												Nervous system disease	Central Nervous system neoplasm		Astrocytoma									M01.004								nucleus	2.60163	0.60574	831	0.71875	0.164703	0.90625	0.000657508	0.84375	0.0149968
P09972	Fructose-bisphosphate aldolase C	ALDOC	+	+	+	26.8753	22.1729	23.5313	+	+	+			+						Nervous system disease	Central Nervous system neoplasm		Astrocytoma	Medulloblastoma																	3.69518	0.86169	611	1	1.0039e-05	0.984375	0.000409881	0.671875	0.163293
P0C0L4;P0C0L4-2	Complement C4-A;Complement C4 beta chain;Complement C4-A alpha chain;C4a anaphylatoxin;C4b-A;C4d-A;Complement C4 gamma chain	C4A	+	+	+	35.4219	33.1972	34.0856	+	+	+			+						Nervous system disease		epilepsy										I39.951		plasma membrane		endoplasmic reticulum		Organelli			4.93285	1.1083	421	0.976562	0.000218423	0.914062	0.00232894	0.773438	0.0974774
P0C0L5	Complement C4-B;Complement C4 beta chain;Complement C4-B alpha chain;C4a anaphylatoxin;C4b-B;C4d-B;Complement C4 gamma chain	C4B	+	+	+	30.7387	28.9446	30.1876												Nervous system disease		epilepsy										I39.951		plasma membrane							1.29515	0.26082	1198	0.875	0.0387081	0.75	0.203436	0.773438	0.14485
Q99878;Q96KK5;P0C0S8;Q9BTM1;P20671;Q9BTM1-2;Q71UI9-5	Histone H2A type 1-J;Histone H2A type 1-H;Histone H2A type 1;Histone H2A.J;Histone H2A type 1-D	HIST1H2AJ;HIST1H2AH;HIST1H2AG;H2AFJ;HIST1H2AD	+	+	+	25.1189	28.3238	31.6086	+			+		+						Nervous system disease	Central Nervous system neoplasm			Medulloblastoma																nucleus	4.04166	0.93714	545	0.78125	0.0292597	1	0.000102657	0.875	0.00301126
P62987;P62979;P0CG47;P0CG48	Ubiquitin-60S ribosomal protein L40;Ubiquitin;60S ribosomal protein L40;Ubiquitin-40S ribosomal protein S27a;Ubiquitin;40S ribosomal protein S27a;Polyubiquitin-B;Ubiquitin;Polyubiquitin-C;Ubiquitin	UBA52;RPS27A;UBB;UBC	+	+	+	29.6596	28.7272	28.4997	+	+	+			+						Nervous system disease	Central Nervous system neoplasm	epilepsy	Astrocytoma	Medulloblastoma										plasma membrane		endoplasmic reticulum	mitochondrion	Organelli	cytoplasm	nucleus	6.76987	1.4984	225	0.84375	0.0269561	0.9375	0.00698579	0.640625	0.377151
P0DJI8;P0DJI9-2	Serum amyloid A-1 protein;Amyloid protein A;Serum amyloid protein A(2-104);Serum amyloid protein A(3-104);Serum amyloid protein A(2-103);Serum amyloid protein A(2-102);Serum amyloid protein A(4-101)	SAA1	+	+	+	26.6657	26.0952	26.5963												Nervous system disease	Central Nervous system neoplasm	epilepsy	Astrocytoma																cytoplasm		0.419368	0.066354	1504	0.546875	0.638406	0.53125	0.923682	0.515625	0.69628
P0DJI9	Serum amyloid A-2 protein	SAA2	+	+	+	23.7018	24.1607	22.4898												Nervous system disease																					1.24882	0.24608	1215	0.546875	0.7512	0.609375	0.397408	0.6875	0.249969
P0DMV8;P0DMV9;P0DMV8-2	Heat shock 70 kDa protein 1A;Heat shock 70 kDa protein 1B	HSPA1A;HSPA1B	+	+	+	25.1693	28.8998	28.5433	+	+	+			+							Central Nervous system neoplasm	epilepsy	Astrocytoma													endoplasmic reticulum	mitochondrion	Organelli	cytoplasm	nucleus	3.50911	0.81834	647	0.890625	0.00100741	0.875	0.00241958	0.5625	0.589373
P0DOX2			+	+	+	27.8168	21.5159	25.5153	+	+		+		+																				plasma membrane							4.43184	1.0054	493	0.984375	4.908e-06	0.765625	0.0730317	0.890625	0.00416219
P0DOX5;P01857	Ig gamma-1 chain C region	IGHG1	+	+	+	35.8473	32.6987	35.1843	+	+				+						Nervous system disease	Central Nervous system neoplasm	epilepsy												plasma membrane							6.1155	1.351	281	0.953125	9.70829e-05	0.765625	0.191385	1	1.56377e-05
P0DOX6			+	+	+	26.2025	21.0814	23.5259	+	+				+																				plasma membrane							3.62849	0.85505	622	0.96875	9.6042e-06	0.8125	0.0331395	0.765625	0.0183503
P0DOX7			+	+	+	33.0167	28.2631	33.0558	+	+		+		+																				plasma membrane							4.66558	1.0517	459	0.953125	0.00119501	0.5625	0.940338	1	0.00079498
P0DOY2;P0DOY3;P0CF74			+	+	+	32.5543	27.0101	31.0766	+	+	+			+																				plasma membrane							7.67672	1.6728	159	1	1.90891e-06	0.882812	0.00266991	1	1.40029e-05
P0DP01			+			25.7036	20.3726	21.538	+	+	+			+																				plasma membrane							8.41831	1.8384	115	1	1.7599e-08	1	2.61935e-07	0.875	0.00954177
P0DP02			+	+	+	26.2454	22.513	23.8612	+	+				+																				plasma membrane							2.13875	0.489	939	0.890625	0.00117781	0.703125	0.0623997	0.640625	0.335222
P0DP08		IGHV4-38-2	+	+		27.2149	20.697	25.8544	+	+	+	+	+	+	+																			plasma membrane							12.7539	2.7166	17	1	5.27188e-09	0.859375	0.0164264	1	4.56597e-08
P0DP25;P0DP24;P0DP23;P27482			+	+	+	27.5704	27.3009	25.7814												Nervous system disease					Synapse									plasma membrane					cytoplasm	nucleus	0.464466	0.074251	1487	0.546875	0.577514	0.734375	0.0540581	0.703125	0.126676
P10153	Non-secretory ribonuclease	RNASE2	+			24.1568	20.2599	21.6412	+	+	+			+						Nervous system disease	Central Nervous system neoplasm		Astrocytoma																		3.58453	0.83565	635	0.984375	7.668e-05	0.859375	0.00599913	0.8125	0.0275353
P10253	Lysosomal alpha-glucosidase;76 kDa lysosomal alpha-glucosidase;70 kDa lysosomal alpha-glucosidase	GAA	+		+	23.9154	21.567	21.6205	+	+	+			+						Nervous system disease		epilepsy												plasma membrane							2.82829	0.65316	790	0.859375	0.00313316	0.953125	0.000457311	0.609375	0.942722
P10301	Ras-related protein R-Ras	RRAS			+	21.1861	21.9972	21.3537												Nervous system disease	Central Nervous system neoplasm		Astrocytoma											plasma membrane							0.278948	0.045898	1546	0.703125	0.0798422	0.53125	0.745249	0.78125	0.167215
P10321;P10321-2	HLA class I histocompatibility antigen, Cw-7 alpha chain	HLA-C	+	+	+	22.9432	26.7134	24.4706	+	+		+		+						Nervous system disease		epilepsy												plasma membrane	Golgi	endoplasmic reticulum		Organelli			3.01668	0.69464	757	1	0.000185369	0.796875	0.107212	0.890625	0.00970259
P16403;P10412;P16402;P22492;Q02539	Histone H1.2;Histone H1.4;Histone H1.3;Histone H1t;Histone H1.1	HIST1H1C;HIST1H1E;HIST1H1D;HIST1H1T;HIST1H1A	+	+	+	22.0335	22.8236	25.1089												Nervous system disease	Central Nervous system neoplasm		Astrocytoma																	nucleus	1.9637	0.4407	981	0.578125	0.522086	0.84375	0.0131391	0.734375	0.0715315
P10451-4;P10451;P10451-2;CON__P31096	Osteopontin	SPP1	+	+	+	33.3598	35.0005	31.0464	+			+		+						Nervous system disease	Central Nervous system neoplasm	epilepsy	Astrocytoma	Medulloblastoma											Golgi	endoplasmic reticulum		Organelli	cytoplasm		1.66524	0.34599	1089	0.710938	0.111742	0.773438	0.0461449	0.851562	0.00657223
P10451-5	Osteopontin	SPP1	+	+	+	27.6622	29.4291	26.5479												Nervous system disease	Central Nervous system neoplasm		Astrocytoma	Medulloblastoma											Golgi	endoplasmic reticulum		Organelli	cytoplasm		1.41591	0.28307	1169	0.703125	0.273745	0.617188	0.354412	0.765625	0.134221
P10586-2;P10586	Receptor-type tyrosine-protein phosphatase F	PTPRF	+			25.8716	20.4486	20.5475	+	+	+			+						Nervous system disease	Central Nervous system neoplasm		Astrocytoma		Synapse									plasma membrane							7.16572	1.5998	188	1	2.97491e-07	1	1.27713e-06	0.609375	0.801561
P10599;P10599-2	Thioredoxin	TXN	+	+	+	26.3051	26.2871	24.2687												Nervous system disease	Central Nervous system neoplasm		Astrocytoma																cytoplasm	nucleus	5.37205	1.208	362	0.609375	0.971627	0.765625	0.032701	0.859375	0.0180098
P10619-2;P10619	Lysosomal protective protein;Lysosomal protective protein 32 kDa chain;Lysosomal protective protein 20 kDa chain	CTSA			+	21.5995	21.7922	21.3423												Nervous system disease	Central Nervous system neoplasm		Astrocytoma									S10.002				endoplasmic reticulum		Organelli			1.06575	0.21002	1267	0.59375	0.73075	0.609375	0.642349	0.625	0.526139
P10636-4;P10636-5	Microtubule-associated protein tau	MAPT	+		+	22.8308	22.7421	21.5559												Nervous system disease	Central Nervous system neoplasm		Astrocytoma											plasma membrane			mitochondrion	Organelli	cytoplasm	nucleus	0.283628	0.046537	1543	0.53125	0.938062	0.59375	0.199518	0.765625	0.114263
P10643;CON__Q29RQ1	Complement component C7	C7	+	+	+	30.1718	26.1004	27.8551	+	+	+			+						Nervous system disease																					2.29669	0.53421	900	0.96875	0.00121644	0.984375	0.00228685	0.703125	0.155324
P10644;P10644-2	cAMP-dependent protein kinase type I-alpha regulatory subunit;cAMP-dependent protein kinase type I-alpha regulatory subunit, N-terminally processed	PRKAR1A	+	+	+	22.0822	23.8644	22.2827												Nervous system disease	Central Nervous system neoplasm	epilepsy		Medulloblastoma										plasma membrane					cytoplasm		0.882803	0.16483	1337	0.796875	0.0975642	0.515625	0.850379	0.734375	0.202085
P10645	Chromogranin-A;Vasostatin-1;Vasostatin-2;EA-92;ES-43;Pancreastatin;SS-18;WA-8;WE-14;LF-19;Catestatin;AL-11;GV-19;GR-44;ER-37;GE-25;Serpinin-RRG;Serpinin;p-Glu serpinin precursor	CHGA	+	+	+	32.1229	28.7351	22.2121	+	+	+	+	+	+	+					Nervous system disease	Central Nervous system neoplasm		Astrocytoma																cytoplasm		9.87483	2.1282	69	0.875	0.00149214	1	5.0785e-07	0.953125	0.000372579
P10768	S-formylglutathione hydrolase	ESD	+	+	+	21.3561	26.8338	26.4361	+	+	+			+						Nervous system disease	Central Nervous system neoplasm		Astrocytoma									S09.990				endoplasmic reticulum		Organelli	cytoplasm		5.48017	1.2309	350	0.984375	1.38014e-05	0.984375	9.10035e-06	0.53125	0.64078
P10909-6;P10909-4;P10909;P10909-5;P10909-2	Clusterin;Clusterin beta chain;Clusterin alpha chain	CLU	+	+	+	35.1692	35.191	34.0095	+			+		+						Nervous system disease	Central Nervous system neoplasm	epilepsy	Astrocytoma	Medulloblastoma											Golgi	endoplasmic reticulum	mitochondrion	Organelli	cytoplasm	nucleus	1.64808	0.34183	1095	0.507812	0.957951	0.992188	0.000351648	0.859375	0.0121848
P11021	78 kDa glucose-regulated protein	HSPA5	+	+	+	27.5723	28.7421	25.499												Nervous system disease	Central Nervous system neoplasm	epilepsy	Astrocytoma											plasma membrane	Golgi	endoplasmic reticulum	mitochondrion	Organelli	cytoplasm	nucleus	2.3132	0.53648	898	0.78125	0.0831696	0.875	0.00305975	0.953125	0.000880119
P11047	Laminin subunit gamma-1	LAMC1	+	+		22.5553	21.2608	29.1356												Nervous system disease	Central Nervous system neoplasm	epilepsy	Astrocytoma													endoplasmic reticulum		Organelli			7.0528	1.5764	194	0.78125	0.0830712	0.984375	2.45939e-05	1	4.78029e-07
P11117;P11117-2	Lysosomal acid phosphatase	ACP2			+	20.87	22.5505	21.5399	+	+				+						Nervous system disease		epilepsy																			1.22189	0.23708	1225	0.828125	0.0107131	0.671875	0.180754	0.734375	0.0446764
P11142;P11142-2	Heat shock cognate 71 kDa protein	HSPA8	+	+	+	27.3018	30.7749	29.4262	+	+	+	+	+	+	+					Nervous system disease	Central Nervous system neoplasm		Astrocytoma		Synapse									plasma membrane					cytoplasm	nucleus	9.28725	2.0644	81	0.9375	1.59906e-05	0.875	0.00083826	0.9375	0.00103596
P11166	Solute carrier family 2, facilitated glucose transporter member 1	SLC2A1	+	+	+	21.8432	31.5483	28.99	+	+	+			+						Nervous system disease	Central Nervous system neoplasm	epilepsy	Astrocytoma	Medulloblastoma										plasma membrane	Golgi			Organelli		nucleus	8.38176	1.8176	117	1	1.10582e-06	0.96875	5.82357e-06	0.828125	0.011759
P11169;Q8TDB8-4;Q8TDB8-2;Q8TDB8;Q8TDB8-5;Q8TDB8-3	Solute carrier family 2, facilitated glucose transporter member 3;Solute carrier family 2, facilitated glucose transporter member 14	SLC2A3;SLC2A14		+	+	21.2941	24.7012	23.4466	+	+	+			+						Nervous system disease	Central Nervous system neoplasm	epilepsy	Astrocytoma	Medulloblastoma										plasma membrane						nucleus	2.59313	0.60434	833	0.90625	0.00113613	0.859375	0.0112281	0.65625	0.216236
P11171;P11171-3;P11171-2;P11171-4;P11171-5;P11171-6;P11171-7	Protein 4.1	EPB41	+	+	+	22.2235	27.3872	23.0677	+	+				+						Nervous system disease	Central Nervous system neoplasm	epilepsy		Medulloblastoma	Synapse									plasma membrane							2.79682	0.64065	802	0.890625	0.00216701	0.59375	0.442401	0.828125	0.0187817
P11215;P11215-2	Integrin alpha-M	ITGAM		+	+	21.3715	28.0414	25.2603	+	+	+	+	+	+	+					Nervous system disease	Central Nervous system neoplasm	epilepsy	Astrocytoma								CD11b			plasma membrane							9.9625	2.144	65	1	8.51032e-09	0.96875	0.000135361	0.859375	0.00443929
P11233	Ras-related protein Ral-A	RALA		+	+	21.0975	24.8424	24.0115	+	+	+			+						Nervous system disease														plasma membrane			mitochondrion	Organelli	cytoplasm		3.36957	0.77995	677	1	1.361e-05	0.953125	5.18173e-05	0.75	0.12267
P11234;P11234-2;P11234-3	Ras-related protein Ral-B	RALB			+	20.5549	22.8756	21.1955	+	+				+						Nervous system disease														plasma membrane							1.06634	0.2101	1266	0.828125	0.0091966	0.703125	0.197003	0.820312	0.0388324
P11277;P11277-2;P11277-3	Spectrin beta chain, erythrocytic	SPTB	+	+	+	22.5343	32.1699	27.041	+	+		+		+						Nervous system disease	Central Nervous system neoplasm		Astrocytoma	Medulloblastoma										plasma membrane					cytoplasm		5.63728	1.2782	323	0.96875	8.23465e-05	0.8125	0.0512312	0.859375	0.0107592
P11279;P11279-2	Lysosome-associated membrane glycoprotein 1	LAMP1	+	+	+	24.9349	25.9601	21.1585												Nervous system disease	Central Nervous system neoplasm	epilepsy	Astrocytoma		Synapse						CD107a			plasma membrane					cytoplasm		6.0527	1.339	284	0.609375	0.218096	0.953125	0.000199029	0.953125	0.000134811
P11362-21;P11362-7;P11362-9;P11362;P11362-19;P11362-2;P11362-20;P11362-8;P11362-14;P11362-6;P11362-5;P11362-18;P11362-4;P11362-3;P11362-10;P11362-11;P11362-12;P11362-13;P11362-16;P11362-15	Fibroblast growth factor receptor 1	FGFR1	+	+	+	23.1854	22.3321	22.1043												Nervous system disease	Central Nervous system neoplasm	epilepsy	Astrocytoma	Medulloblastoma							CD331		FGFR1	plasma membrane					cytoplasm	nucleus	0.38126	0.061076	1517	0.71875	0.491036	0.75	0.226799	0.546875	0.868117
P11413;P11413-2;P11413-3	Glucose-6-phosphate 1-dehydrogenase	G6PD		+	+	20.9999	25.1056	24.0836	+	+	+			+						Nervous system disease	Central Nervous system neoplasm		Astrocytoma											plasma membrane					cytoplasm	nucleus	2.93998	0.67895	769	0.953125	0.00115133	0.875	0.00739882	0.625	0.454338
P11532-4;P11532-11;P11532;P11532-3;P11532-2;P11532-13;P11532-16;P11532-12;P11532-15;P11532-14;P11532-17	Dystrophin	DMD	+			24.9952	20.2688	21.1583	+	+	+			+						Nervous system disease	Central Nervous system neoplasm	epilepsy	Astrocytoma	Medulloblastoma	Synapse									plasma membrane						nucleus	4.92466	1.1043	423	0.921875	4.6613e-05	0.890625	0.000641049	0.6875	0.133139
P11586	C-1-tetrahydrofolate synthase, cytoplasmic;Methylenetetrahydrofolate dehydrogenase;Methenyltetrahydrofolate cyclohydrolase;Formyltetrahydrofolate synthetase;C-1-tetrahydrofolate synthase, cytoplasmic, N-terminally processed	MTHFD1		+	+	21.0632	23.7498	23.2571	+	+				+						Nervous system disease		epilepsy															mitochondrion	Organelli			2.02379	0.45807	967	0.953125	0.000398248	0.796875	0.0620505	0.578125	0.663868
P11766	Alcohol dehydrogenase class-3	ADH5		+	+	21.3688	24.1238	23.241	+	+				+						Nervous system disease																	mitochondrion	Organelli			1.74854	0.37086	1060	1	5.49157e-05	0.8125	0.0246804	0.625	0.263913
P12107-4;P12107-3;P12107;P12107-2	Collagen alpha-1(XI) chain	COL11A1	+	+	+	24.1487	22.1918	26.996	+	+		+		+						Nervous system disease	Central Nervous system neoplasm	epilepsy	Astrocytoma													endoplasmic reticulum		Organelli			3.2168	0.73982	714	0.84375	0.0179674	0.8125	0.0418854	0.90625	0.00222545
P12109	Collagen alpha-1(VI) chain	COL6A1	+	+	+	30.5417	27.7399	31.2809	+	+				+						Nervous system disease	Central Nervous system neoplasm	epilepsy	Astrocytoma													endoplasmic reticulum		Organelli			2.19183	0.49863	925	0.90625	0.00369518	0.75	0.0817673	0.96875	0.00102899
P12110;P12110-3;P12110-2	Collagen alpha-2(VI) chain	COL6A2	+	+	+	23.1108	23.1571	30.3075												Nervous system disease	Central Nervous system neoplasm	epilepsy	Astrocytoma													endoplasmic reticulum		Organelli			6.4087	1.4154	255	0.5625	0.972567	1	3.27436e-07	0.984375	5.02318e-05
P12111;P12111-2;P12111-5;P12111-3	Collagen alpha-3(VI) chain	COL6A3	+	+	+	29.1477	26.3287	32.4222												Nervous system disease	Central Nervous system neoplasm	epilepsy	Astrocytoma	Medulloblastoma								I02.968				endoplasmic reticulum		Organelli			4.4687	1.014	486	0.78125	0.0329049	1	5.37307e-05	0.953125	0.000193292
P12236	ADP/ATP translocase 3;ADP/ATP translocase 3, N-terminally processed	SLC25A6		+	+	21.1662	23.4031	22.1558	+	+				+						Nervous system disease		epilepsy															mitochondrion	Organelli		nucleus	0.807177	0.14432	1359	0.8125	0.0173751	0.703125	0.133589	0.6875	0.224795
P12259	Coagulation factor V;Coagulation factor V heavy chain;Coagulation factor V light chain	F5	+	+	+	30.2621	30.4804	30.7944												Nervous system disease	Central Nervous system neoplasm	epilepsy	Astrocytoma											plasma membrane	Golgi	endoplasmic reticulum		Organelli			0.0923997	0.010427	1604	0.59375	0.730618	0.601562	0.275371	0.523438	0.589775
P12270	Nucleoprotein TPR	TPR		+	+	21.4741	21.0956	26.2248	+			+		+						Nervous system disease	Central Nervous system neoplasm		Astrocytoma	Medulloblastoma															cytoplasm	nucleus	6.5003	1.4412	243	0.640625	0.61177	1	1.71509e-05	0.96875	2.51992e-05
P12277	Creatine kinase B-type	CKB	+	+	+	25.3169	28.1358	25.1955	+	+				+						Nervous system disease														plasma membrane			mitochondrion	Organelli		nucleus	1.49265	0.29663	1149	0.875	0.00459536	0.5625	0.889427	0.875	0.0150683
P12314;P12314-2;Q92637-2	High affinity immunoglobulin gamma Fc receptor I	FCGR1A		+	+	21.4156	26.7102	25.1752	+	+	+	+	+	+	+					Nervous system disease	Central Nervous system neoplasm	epilepsy	Astrocytoma	Medulloblastoma							CD64a			plasma membrane							10.8412	2.3966	40	1	4.95601e-07	1	7.23712e-06	0.9375	0.00309915
P12318-2;P12318	Low affinity immunoglobulin gamma Fc region receptor II-a	FCGR2A	+	+	+	23.0469	25.1271	22.7709												Nervous system disease		epilepsy												plasma membrane	Golgi			Organelli			1.43542	0.28488	1166	0.78125	0.0401723	0.5625	0.76514	0.875	0.00639744
P12429	Annexin A3	ANXA3		+	+	21.7855	24.0949	23.9097												Nervous system disease	Central Nervous system neoplasm		Astrocytoma	Medulloblastoma										plasma membrane					cytoplasm		1.58951	0.32407	1119	0.84375	0.0333456	0.796875	0.0278552	0.515625	0.875901
P12532;P12532-2	Creatine kinase U-type, mitochondrial	CKMT1A		+	+	20.7404	21.0595	24.3641	+			+		+																							mitochondrion	Organelli			3.37631	0.78251	674	0.5625	0.590387	0.9375	0.00141986	0.921875	0.0035011
P12724	Eosinophil cationic protein	RNASE3		+	+	21.5547	22.9173	24.713												Nervous system disease																					2.40854	0.55926	875	0.703125	0.0894082	1	0.000246177	0.78125	0.0553479
P12814;P12814-3;P12814-2	Alpha-actinin-1	ACTN1	+	+	+	22.8725	28.9042	24.9348	+	+	+	+	+	+	+					Nervous system disease	Central Nervous system neoplasm		Astrocytoma											plasma membrane					cytoplasm	nucleus	9.30269	2.0754	80	1	0.000100072	0.796875	0.0206704	0.9375	0.00308186
P12955;P12955-2;P12955-3	Xaa-Pro dipeptidase	PEPD	+		+	22.7818	21.1423	21.4617												Nervous system disease	Central Nervous system neoplasm		Astrocytoma									M24.007									0.806242	0.14239	1362	0.84375	0.0735354	0.859375	0.10654	0.5625	0.573564
P13073	Cytochrome c oxidase subunit 4 isoform 1, mitochondrial	COX4I1			+	21.4211	23.5884	21.5045												Nervous system disease	Central Nervous system neoplasm	epilepsy	Astrocytoma														mitochondrion	Organelli			1.27705	0.25177	1207	0.796875	0.0394959	0.523438	0.875066	0.75	0.051762
P13284	Gamma-interferon-inducible lysosomal thiol reductase	IFI30	+		+	22.9089	20.9777	22.5258	+	+				+						Nervous system disease	Central Nervous system neoplasm		Astrocytoma																		3.0105	0.69125	759	0.828125	0.01295	0.640625	0.711264	0.75	0.111085
P13473;P13473-2;P13473-3	Lysosome-associated membrane glycoprotein 2	LAMP2	+	+	+	27.0184	24.7646	22.5063	+	+	+	+	+	+	+					Nervous system disease	Central Nervous system neoplasm	epilepsy	Astrocytoma								CD107b			plasma membrane	Golgi			Organelli	cytoplasm		10.6499	2.3209	46	0.96875	0.0001397	1	3.25854e-06	0.875	0.00411707
P13489	Ribonuclease inhibitor	RNH1	+	+	+	23.1715	23.1777	22.4355												Nervous system disease	Central Nervous system neoplasm		Astrocytoma											plasma membrane							0.897996	0.17033	1328	0.5	0.995191	0.59375	0.469387	0.625	0.478297
P13497;P13497-4;P13497-5;P13497-2;P13497-6	Bone morphogenetic protein 1	BMP1		+	+	21.7135	21.9723	25.7171	+			+		+						Nervous system disease	Central Nervous system neoplasm		Astrocytoma									M12.005			Golgi			Organelli			6.68433	1.49	228	0.53125	0.652194	0.984375	7.05595e-05	1	3.04216e-05
P13498	Cytochrome b-245 light chain	CYBA		+	+	21.0582	26.1502	23.4854	+	+				+						Nervous system disease	Central Nervous system neoplasm	epilepsy	Astrocytoma											plasma membrane	Golgi	endoplasmic reticulum		Organelli		nucleus	4.4783	1.0153	485	1	2.18812e-07	0.75	0.0372838	0.75	0.0198244
P13500	C-C motif chemokine 2	CCL2	+		+	23.5612	21.5665	21.5789	+	+	+			+						Nervous system disease	Central Nervous system neoplasm	epilepsy	Astrocytoma	Medulloblastoma	Synapse																3.31945	0.77268	687	0.8125	0.0164425	0.84375	0.0163469	0.507812	0.985235
P13521	Secretogranin-2;Secretoneurin;Manserin	SCG2	+	+	+	29.9266	25.8174	21.9591	+	+	+	+	+	+	+					Nervous system disease	Central Nervous system neoplasm		Astrocytoma	Medulloblastoma	Synapse											endoplasmic reticulum		Organelli			9.79608	2.1157	70	0.960938	0.00300304	1	7.99504e-08	0.890625	0.0123957
P13533	Myosin-6	MYH6		+		20.9561	20.6036	25.7722												Nervous system disease	Central Nervous system neoplasm	epilepsy	Astrocytoma																cytoplasm		8.09177	1.7601	132	0.71875	0.397348	1	7.61014e-08	1	1.1136e-09
P13591;P13591-5;P13591-6	Neural cell adhesion molecule 1	NCAM1	+	+	+	29.67	27.6826	24.2073	+		+			+						Nervous system disease	Central Nervous system neoplasm	epilepsy	Astrocytoma	Medulloblastoma							CD56			plasma membrane	Golgi			Organelli			3.97474	0.91728	558	0.84375	0.0445263	1	1.11258e-08	0.890625	0.00307074
P13591-1;P13591-4;P13591-3	Neural cell adhesion molecule 1	NCAM1	+			23.9109	20.3078	21.1866	+	+	+			+						Nervous system disease	Central Nervous system neoplasm		Astrocytoma	Medulloblastoma							CD56			plasma membrane	Golgi			Organelli			7.71299	1.673	158	1	2.18779e-06	0.96875	2.63345e-05	0.875	0.00513199
P13598	Intercellular adhesion molecule 2	ICAM2	+			25.1457	20.7728	21.819	+	+	+			+						Nervous system disease	Central Nervous system neoplasm										CD102			plasma membrane							7.86258	1.7013	146	1	1.99784e-08	1	3.69104e-07	0.828125	0.0159222
P13611;P13611-5;P13611-2;P13611-3;P13611-4	Versican core protein	VCAN	+	+	+	27.2709	28.2104	29.2067												Nervous system disease	Central Nervous system neoplasm	epilepsy	Astrocytoma												Golgi	endoplasmic reticulum		Organelli			0.730353	0.12322	1389	0.640625	0.462818	0.96875	0.000319174	0.546875	0.432092
P13637;P13637-2;P13637-3;P54707;P54707-2	Sodium/potassium-transporting ATPase subunit alpha-3	ATP1A3		+	+	21.3544	22.8414	22.2969												Nervous system disease	Central Nervous system neoplasm	epilepsy	Astrocytoma		Synapse									plasma membrane	Golgi	endoplasmic reticulum		Organelli			0.685356	0.11584	1407	0.78125	0.0871736	0.78125	0.0531014	0.5	0.524039
P13639	Elongation factor 2	EEF2	+	+	+	24.6477	27.6439	26.6002	+	+				+						Nervous system disease	Central Nervous system neoplasm	epilepsy	Astrocytoma											plasma membrane					cytoplasm	nucleus	1.92423	0.42362	999	0.9375	0.00338757	0.84375	0.044623	0.765625	0.0678111
P13667	Protein disulfide-isomerase A4	PDIA4		+	+	21.2751	23.4136	22.7117												Nervous system disease	Central Nervous system neoplasm		Astrocytoma													endoplasmic reticulum		Organelli			0.476121	0.076476	1484	0.71875	0.0960726	0.734375	0.172439	0.546875	0.647864
P13671	Complement component C6	C6	+	+	+	28.4183	26.5664	28.6709												Nervous system disease																					3.2547	0.75742	704	0.796875	0.0488485	0.53125	0.564204	0.84375	0.0287547
P13693;P13693-2;Q56UQ5	Translationally-controlled tumor protein;TPT1-like protein	TPT1	+		+	23.0615	24.7	22.2997												Nervous system disease	Central Nervous system neoplasm	epilepsy	Astrocytoma																cytoplasm	nucleus	1.39426	0.27763	1176	0.75	0.0605591	0.65625	0.4621	0.796875	0.0301544
P13716;P13716-2	Delta-aminolevulinic acid dehydratase	ALAD	+		+	23.9723	24.4722	22.0479												Nervous system disease	Central Nervous system neoplasm																			nucleus	0.631143	0.10132	1430	0.5	0.745065	0.71875	0.12466	0.8125	0.0944742
P13796;P13796-2;Q14651	Plastin-2	LCP1	+	+	+	28.3064	27.5505	26.2704												Nervous system disease	Central Nervous system neoplasm		Astrocytoma											plasma membrane					cytoplasm		0.686672	0.11697	1405	0.640625	0.3149	0.859375	0.00975852	0.671875	0.154984
P13798	Acylamino-acid-releasing enzyme	APEH	+		+	22.5313	22.4714	21.0281												Nervous system disease												S09.004									1.01868	0.1991	1283	0.546875	0.936388	0.75	0.0646754	0.765625	0.0776782
P13861-2;P13861	cAMP-dependent protein kinase type II-alpha regulatory subunit	PRKAR2A			+	21.5587	23.8162	20.8846	+	+		+		+						Nervous system disease														plasma membrane					cytoplasm		3.9778	0.91909	557	0.875	0.00555994	0.625	0.302247	0.96875	0.000434713
P13987;P13987-2	CD59 glycoprotein	CD59	+	+	+	24.3584	25.7321	25.6856	+	+	+			+						Nervous system disease	Central Nervous system neoplasm	epilepsy	Astrocytoma								CD59			plasma membrane	Golgi	endoplasmic reticulum		Organelli			3.2747	0.75893	702	0.84375	0.0135092	0.875	0.0162829	0.53125	0.925489
P14136;P14136-3;P14136-2	Glial fibrillary acidic protein	GFAP	+	+	+	28.7361	28.3131	28.5382												Nervous system disease	Central Nervous system neoplasm	epilepsy	Astrocytoma	Medulloblastoma	Synapse														cytoplasm		0.945732	0.18583	1309	0.515625	0.666224	0.5625	0.790134	0.578125	0.774625
P14151;P14151-2	L-selectin	SELL	+			23.9815	20.6948	21.2314	+	+	+			+						Nervous system disease	Central Nervous system neoplasm	epilepsy	Astrocytoma								CD62L			plasma membrane							3.08111	0.71267	739	0.953125	0.000119172	0.9375	0.000125994	0.671875	0.236347
P14174	Macrophage migration inhibitory factor	MIF	+	+	+	26.2949	24.8303	25.5254	+	+				+						Nervous system disease	Central Nervous system neoplasm	epilepsy	Astrocytoma											plasma membrane					cytoplasm		1.77658	0.37763	1050	1	4.23327e-06	0.804688	0.033095	0.765625	0.0578204
P14209;P14209-3;P14209-2	CD99 antigen	CD99	+	+	+	24.319	26.3904	23.8484												Nervous system disease	Central Nervous system neoplasm		Astrocytoma	Medulloblastoma							CD99			plasma membrane					cytoplasm		1.81163	0.38419	1042	0.65625	0.12835	0.640625	0.732164	0.875	0.0180015
P14314-2;P14314	Glucosidase 2 subunit beta	PRKCSH	+	+	+	25.632	25.4033	22.7119												Nervous system disease	Central Nervous system neoplasm		Astrocytoma													endoplasmic reticulum		Organelli			2.33214	0.54071	894	0.59375	0.77979	0.828125	0.00672299	0.8125	0.0382116
P14317;P14317-2	Hematopoietic lineage cell-specific protein	HCLS1			+	21.3728	21.3923	21.6831												Nervous system disease	Central Nervous system neoplasm		Astrocytoma											plasma membrane			mitochondrion	Organelli	cytoplasm	nucleus	0.0525079	0.0048301	1611	0.53125	0.974648	0.585938	0.638276	0.578125	0.442032
P14324-2;P14324	Farnesyl pyrophosphate synthase	FDPS	+		+	21.6305	22.1257	21.5451												Nervous system disease	Central Nervous system neoplasm	epilepsy	Astrocytoma																cytoplasm		0.222202	0.028513	1570	0.640625	0.480352	0.515625	0.907222	0.5625	0.412919
P14384	Carboxypeptidase M	CPM		+	+	21.209	23.025	21.3592	+	+				+						Nervous system disease	Central Nervous system neoplasm		Astrocytoma	Medulloblastoma								M14.006		plasma membrane							1.69765	0.35591	1081	0.859375	0.0056128	0.546875	0.787729	0.84375	0.0130944
P14406	Cytochrome c oxidase subunit 7A2, mitochondrial	COX7A2		+	+	21.6814	22.6	21.7431												Nervous system disease	Central Nervous system neoplasm		Astrocytoma																		0.4302	0.06927	1498	0.640625	0.156045	0.546875	0.903604	0.625	0.228631
P14543;P14543-2	Nidogen-1	NID1	+	+	+	26.8416	22.1952	30.3458	+	+	+	+	+	+	+					Nervous system disease	Central Nervous system neoplasm	epilepsy	Astrocytoma	Medulloblastoma																	10.0128	2.1554	63	0.875	0.00137947	0.96875	0.000353449	1	1.12507e-05
P14550	Alcohol dehydrogenase [NADP(+)]	AKR1A1	+	+	+	23.4631	22.3821	22.6497												Nervous system disease	Central Nervous system neoplasm	epilepsy	Astrocytoma											plasma membrane							0.750466	0.1279	1382	0.71875	0.191845	0.625	0.434177	0.546875	0.777586
P14618;P14618-3	Pyruvate kinase PKM	PKM	+	+	+	29.8976	31.024	30.7863	+	+				+						Nervous system disease	Central Nervous system neoplasm		Astrocytoma	Medulloblastoma												endoplasmic reticulum	mitochondrion	Organelli	cytoplasm	nucleus	2.49588	0.58448	855	0.890625	0.00104864	0.796875	0.0432086	0.59375	0.543331
P14618-2	Pyruvate kinase PKM	PKM	+	+	+	25.8482	22.0031	26.1988	+	+		+		+						Nervous system disease	Central Nervous system neoplasm		Astrocytoma	Medulloblastoma												endoplasmic reticulum	mitochondrion	Organelli	cytoplasm	nucleus	5.05084	1.1303	402	1	1.4701e-06	0.578125	0.414603	1	4.90494e-06
P14625;Q58FF3	Endoplasmin	HSP90B1	+	+	+	26.5308	29.8403	27.1525	+	+				+						Nervous system disease	Central Nervous system neoplasm	epilepsy	Astrocytoma	Medulloblastoma										plasma membrane		endoplasmic reticulum		Organelli	cytoplasm	nucleus	2.80447	0.64593	798	0.945312	0.00100382	0.546875	0.474938	0.859375	0.021954
P14770	Platelet glycoprotein IX	GP9		+	+	21.102	23.7732	22.3696	+	+				+						Nervous system disease											CD42a			plasma membrane							0.932345	0.17911	1315	0.84375	0.016918	0.53125	0.236403	0.6875	0.31849
P14868;P14868-2	Aspartate--tRNA ligase, cytoplasmic	DARS		+	+	21.9069	23.57	23.2917												Nervous system disease																			cytoplasm		0.984058	0.19422	1292	0.703125	0.0900005	0.6875	0.18318	0.546875	0.821617
P14923	Junction plakoglobin	JUP	+	+	+	22.9246	23.1617	23.8709												Nervous system disease	Central Nervous system neoplasm	epilepsy		Medulloblastoma										plasma membrane					cytoplasm	nucleus	0.982059	0.19311	1293	0.546875	0.835552	0.671875	0.515077	0.53125	0.631735
P15104	Glutamine synthetase	GLUL		+	+	21.0418	23.3538	22.8812	+	+	+			+						Nervous system disease	Central Nervous system neoplasm	epilepsy	Astrocytoma		Synapse	Synaptosome	GABAergic synapse			Glutamatergic synapse				plasma membrane		endoplasmic reticulum	mitochondrion	Organelli	cytoplasm	nucleus	2.04455	0.46177	961	0.953125	0.0013946	0.859375	0.0146723	0.625	0.394424
P15121;C9JRZ8;C9JRZ8-2	Aldose reductase	AKR1B1	+		+	23.2388	22.9301	20.787	+			+		+						Nervous system disease	Central Nervous system neoplasm		Astrocytoma														mitochondrion	Organelli			1.14581	0.22106	1249	0.53125	0.703008	0.859375	0.0153321	0.90625	0.00408284
P15144	Aminopeptidase N	ANPEP	+	+	+	21.8406	26.3936	24.3707	+	+	+			+						Nervous system disease	Central Nervous system neoplasm	epilepsy	Astrocytoma	Medulloblastoma	Synapse						CD13	M01.001		plasma membrane	Golgi	endoplasmic reticulum		Organelli	cytoplasm		6.29355	1.3728	267	0.96875	7.72259e-05	0.875	0.00797359	0.828125	0.0457638
P15153	Ras-related C3 botulinum toxin substrate 2	RAC2		+	+	20.9964	25.1954	25.1236	+	+	+			+						Nervous system disease	Central Nervous system neoplasm		Astrocytoma											plasma membrane		endoplasmic reticulum		Organelli			6.95045	1.5448	205	1	2.44573e-11	0.90625	5.55262e-05	0.75	0.920279
P15169;CON__Q2KJ83	Carboxypeptidase N catalytic chain	CPN1	+	+	+	24.8988	21.0681	27.4144	+	+		+		+						Nervous system disease												M14.004									4.31942	0.98351	510	0.96875	5.17759e-05	0.75	0.0344507	1	2.20949e-05
P15170-2;P15170-3;P15170;Q8IYD1	Eukaryotic peptide chain release factor GTP-binding subunit ERF3A;Eukaryotic peptide chain release factor GTP-binding subunit ERF3B	GSPT1;GSPT2		+	+	21.5797	21.5876	22.1636												Nervous system disease	Central Nervous system neoplasm		Astrocytoma																cytoplasm		0.110013	0.012528	1599	0.53125	0.989869	0.578125	0.406852	0.5625	0.455968
P15259	Phosphoglycerate mutase 2	PGAM2	+	+	+	25.998	26.1177	25.7755												Nervous system disease	Central Nervous system neoplasm		Astrocytoma																	nucleus	0.149363	0.018409	1592	0.6875	0.894615	0.578125	0.483232	0.71875	0.711202
P15291-2;P15291	Beta-1,4-galactosyltransferase 1;Lactose synthase A protein;N-acetyllactosamine synthase;Beta-N-acetylglucosaminylglycopeptide beta-1,4-galactosyltransferase;Beta-N-acetylglucosaminyl-glycolipid beta-1,4-galactosyltransferase;Processed beta-1,4-galactosyltransferase 1	B4GALT1	+	+	+	25.7219	22.4908	23.0414	+	+	+			+						Nervous system disease	Central Nervous system neoplasm		Astrocytoma											plasma membrane	Golgi			Organelli			4.02624	0.9338	547	0.984375	0.000228598	0.9375	0.00250257	0.609375	0.544181
P15311	Ezrin	EZR	+	+	+	24.4543	29.4404	27.5899	+	+	+	+	+	+	+					Nervous system disease	Central Nervous system neoplasm	epilepsy	Astrocytoma	Medulloblastoma										plasma membrane					cytoplasm		10.7622	2.3705	43	1	1.97195e-07	1	0.000241491	0.859375	0.0110915
P15328;REV__P48380-3;REV__P48378-2;REV__P48380-2;REV__P48378;REV__P48380	Folate receptor alpha	FOLR1	+	+	+	23.6232	24.7779	24.4883												Nervous system disease	Central Nervous system neoplasm		Astrocytoma	Medulloblastoma										plasma membrane	Golgi	endoplasmic reticulum		Organelli		nucleus	0.171008	0.022806	1584	0.59375	0.225895	0.664062	0.379967	0.546875	0.746962
P15374	Ubiquitin carboxyl-terminal hydrolase isozyme L3	UCHL3	+	+	+	24.1495	25.2975	22.9737												Nervous system disease		epilepsy										C12.003							cytoplasm		0.287108	0.046915	1541	0.625	0.474755	0.640625	0.46944	0.726562	0.183187
P15502-13;P15502-2;P15502-1;P15502-4;P15502-10;P15502;P15502-9;P15502-7;P15502-6;P15502-12;P15502-5	Elastin	ELN	+	+	+	22.4733	23.4285	22.5769												Nervous system disease	Central Nervous system neoplasm	epilepsy	Astrocytoma																		0.442205	0.071467	1494	0.5625	0.364272	0.515625	0.922661	0.578125	0.523113
P15509-6;P15509-8;P15509-4;P15509-3;P15509-5;P15509;P15509-2;P15509-7	Granulocyte-macrophage colony-stimulating factor receptor subunit alpha	CSF2RA	+			23.867	20.6869	21.6337	+	+	+			+						Nervous system disease	Central Nervous system neoplasm		Astrocytoma								CD116			plasma membrane							5.96988	1.3139	299	1	2.00309e-06	1	1.9402e-06	0.75	0.0506013
P15529-15;P15529-12;P15529-14;P15529-11;P15529-13;P15529-10;P15529;P15529-9;P15529-7;P15529-8;P15529-4;P15529-6;P15529-3;P15529-5;P15529-2	Membrane cofactor protein	CD46			+	21.3106	21.6068	21.7508												Nervous system disease	Central Nervous system neoplasm	epilepsy	Astrocytoma	Medulloblastoma							CD46			plasma membrane							0.0546749	0.0049734	1610	0.5625	0.611137	0.625	0.398515	0.59375	0.759458
P15531;P15531-2	Nucleoside diphosphate kinase A	NME1	+	+	+	22.6673	24.6873	23.3796	+	+				+						Nervous system disease	Central Nervous system neoplasm	epilepsy	Astrocytoma	Medulloblastoma															cytoplasm	nucleus	1.29782	0.26085	1197	0.84375	0.0108079	0.6875	0.360745	0.71875	0.108511
P15559-3;P15559-2;P15559	NAD(P)H dehydrogenase [quinone] 1	NQO1		+	+	21.2759	23.497	21.6081	+	+				+						Nervous system disease	Central Nervous system neoplasm	epilepsy	Astrocytoma		Synapse														cytoplasm	nucleus	1.92667	0.426	994	0.859375	0.00826905	0.546875	0.513083	0.796875	0.0390337
P15586-2;P15586	N-acetylglucosamine-6-sulfatase	GNS	+	+	+	22.2831	20.9095	21.9535												Nervous system disease	Central Nervous system neoplasm		Astrocytoma																		0.851374	0.15808	1342	0.8125	0.0340436	0.625	0.662225	0.71875	0.196991
P15924;P15924-3;P15924-2	Desmoplakin	DSP	+	+	+	26.1672	22.596	25.5699												Nervous system disease	Central Nervous system neoplasm	epilepsy	Astrocytoma	Medulloblastoma										plasma membrane					cytoplasm	nucleus	2.01794	0.45041	971	0.8125	0.0505047	0.5	0.708844	0.703125	0.129445
P15954	Cytochrome c oxidase subunit 7C, mitochondrial	COX7C			+	21.9344	22.3797	21.5079												Nervous system disease	Central Nervous system neoplasm		Astrocytoma														mitochondrion	Organelli			0.507659	0.082397	1470	0.59375	0.524134	0.546875	0.579177	0.671875	0.263399
P16035	Metalloproteinase inhibitor 2	TIMP2	+		+	27.3433	21.8448	21.1684	+	+	+			+						Nervous system disease	Central Nervous system neoplasm	epilepsy	Astrocytoma									I35.002									7.85363	1.7003	148	1	5.63538e-08	1	6.71545e-09	0.65625	0.302731
P16070;P16070-16;P16070-5;P16070-7;P16070-3;P16070-4;P16070-6;P16070-17;P16070-8;P16070-10;P16070-11;P16070-13;P16070-14;P16070-12;P16070-18;P16070-15;P16070-9;P16070-19	CD44 antigen	CD44	+	+	+	28.3945	29.3154	27.2127												Nervous system disease	Central Nervous system neoplasm	epilepsy	Astrocytoma	Medulloblastoma							CD44			plasma membrane	Golgi			Organelli			0.943496	0.18254	1313	0.71875	0.251559	0.929688	0.00744436	0.8125	0.0242043
P16152;P16152-2	Carbonyl reductase [NADPH] 1	CBR1	+	+	+	23.6816	27.8549	27.6375	+	+	+			+						Nervous system disease	Central Nervous system neoplasm	epilepsy	Astrocytoma																		3.91126	0.90423	566	1	2.32388e-06	0.921875	0.000396901	0.59375	0.767434
P16157-10;P16157-8;P16157-5;P16157-16;P16157-3;P16157;P16157-12;P16157-14;P16157-21;P16157-2	Ankyrin-1	ANK1	+	+	+	24.662	32.343	27.8599	+	+				+						Nervous system disease	Central Nervous system neoplasm	epilepsy	Astrocytoma		Synapse									plasma membrane					cytoplasm		5.50738	1.2436	343	0.96875	0.000279668	0.734375	0.150888	0.796875	0.0337654
P16284-3;P16284-6;P16284;P16284-5;P16284-4;P16284-2	Platelet endothelial cell adhesion molecule	PECAM1			+	22.2108	23.5243	20.5786	+			+		+								epilepsy									CD31			plasma membrane							2.62019	0.61134	827	0.734375	0.125461	0.921875	0.00219936	0.96875	0.00210231
P16401	Histone H1.5	HIST1H1B	+	+	+	21.4753	22.3815	25.0234												Nervous system disease	Central Nervous system neoplasm																			nucleus	1.91953	0.42137	1003	0.515625	0.397551	0.984375	0.000210806	0.78125	0.039487
P16452-2;P16452;P16452-3	Erythrocyte membrane protein band 4.2	EPB42	+	+	+	21.9521	28.2417	26.305	+	+	+			+						Nervous system disease														plasma membrane							3.2238	0.74355	711	0.90625	0.000706042	0.90625	0.00372188	0.671875	0.253986
P16671-3;P16671;P16671-4;P16671-2	Platelet glycoprotein 4	CD36		+	+	21.4907	24.691	24.6686												Nervous system disease	Central Nervous system neoplasm	epilepsy	Astrocytoma								CD36			plasma membrane	Golgi			Organelli	cytoplasm		1.28327	0.25503	1203	0.71875	0.0272038	0.8125	0.0151549	0.5	0.98926
P16870-2;P16870	Carboxypeptidase E	CPE	+	+	+	29.1215	27.8849	26.7362												Nervous system disease	Central Nervous system neoplasm	epilepsy	Astrocytoma									M14.005		plasma membrane	Golgi			Organelli			4.23747	0.9581	524	0.71875	0.156727	0.921875	0.00277322	0.671875	0.202369
P16949;P16949-2	Stathmin	STMN1	+		+	24.5383	24.4053	21.2646	+			+		+						Nervous system disease	Central Nervous system neoplasm	epilepsy	Astrocytoma	Medulloblastoma															cytoplasm		1.72454	0.36382	1068	0.578125	0.900073	1	0.000127097	0.90625	0.00394289
P17066	Heat shock 70 kDa protein 6	HSPA6	+	+	+	24.8014	25.0995	26.4789												Nervous system disease																			cytoplasm	nucleus	1.08417	0.21408	1261	0.5625	0.771046	0.921875	0.00306412	0.71875	0.159266
P17174;P17174-2	Aspartate aminotransferase, cytoplasmic	GOT1	+	+	+	28.3324	22.7274	22.6486	+	+	+			+						Nervous system disease	Central Nervous system neoplasm	epilepsy	Astrocytoma	Medulloblastoma															cytoplasm	nucleus	5.08013	1.1489	395	1	5.06509e-06	0.984375	2.14933e-05	0.5	0.940618
P17301	Integrin alpha-2	ITGA2			+	21.5194	23.1179	21.9589												Nervous system disease	Central Nervous system neoplasm	epilepsy	Astrocytoma	Medulloblastoma							CD49b			plasma membrane					cytoplasm	nucleus	0.675784	0.11046	1412	0.75	0.0304395	0.578125	0.450639	0.6875	0.159237
P17302	Gap junction alpha-1 protein	GJA1		+	+	21.093	23.8977	23.7442	+	+	+			+						Nervous system disease	Central Nervous system neoplasm	epilepsy	Astrocytoma	Medulloblastoma	Synapse									plasma membrane	Golgi	endoplasmic reticulum	mitochondrion	Organelli	cytoplasm	nucleus	1.6318	0.3376	1103	0.984375	0.00219672	0.84375	0.00943938	0.59375	0.87834
P17612-2;P17612	cAMP-dependent protein kinase catalytic subunit alpha	PRKACA			+	21.2966	22.6382	21.2996												Nervous system disease	Central Nervous system neoplasm			Medulloblastoma	Synapse	Synaptosome	GABAergic synapse	Cholinergic synapse	Serotonergic synapse	Glutamatergic synapse			PRKACA	plasma membrane			mitochondrion	Organelli	cytoplasm	nucleus	0.769359	0.12916	1379	0.765625	0.0546064	0.53125	0.996575	0.703125	0.13714
P17677;P17677-2	Neuromodulin	GAP43	+	+	+	26.1903	26.6244	24.4544												Nervous system disease	Central Nervous system neoplasm	epilepsy	Astrocytoma		Synapse									plasma membrane					cytoplasm		3.07963	0.71263	740	0.578125	0.633974	0.78125	0.0370052	0.859375	0.0229901
P17858;P17858-2	ATP-dependent 6-phosphofructokinase, liver type	PFKL		+	+	21.4959	26.668	23.1562	+	+		+		+						Nervous system disease	Central Nervous system neoplasm	epilepsy	Astrocytoma																		6.93754	1.5443	206	1	1.86113e-05	0.765625	0.0493081	0.9375	0.000749227
P17900	Ganglioside GM2 activator;Ganglioside GM2 activator isoform short	GM2A	+	+	+	30.4872	24.7622	23.2298	+	+	+			+						Nervous system disease	Central Nervous system neoplasm		Astrocytoma											plasma membrane					cytoplasm		4.45317	1.0099	489	1	0.000135	1	1.25602e-05	0.6875	0.331647
P17927;Q2VPA4-3;Q2VPA4	Complement receptor type 1	CR1			+	21.8131	22.33	21.5582												Nervous system disease	Central Nervous system neoplasm	epilepsy	Astrocytoma								CD35			plasma membrane					cytoplasm		0.369149	0.059297	1519	0.625	0.402129	0.5625	0.68088	0.664062	0.218124
P17931	Galectin-3	LGALS3	+	+	+	23.5584	25.9085	24.8939												Nervous system disease	Central Nervous system neoplasm	epilepsy	Astrocytoma	Medulloblastoma										plasma membrane					cytoplasm	nucleus	0.893813	0.16966	1330	0.796875	0.0263869	0.75	0.109622	0.65625	0.234289
P17936;P17936-2	Insulin-like growth factor-binding protein 3	IGFBP3	+	+	+	24.8892	25.1371	22.3774												Nervous system disease	Central Nervous system neoplasm	epilepsy	Astrocytoma	Medulloblastoma								I31.952				endoplasmic reticulum		Organelli		nucleus	0.997292	0.19603	1289	0.5	0.838579	0.84375	0.00631321	0.78125	0.0489332
P17980	26S protease regulatory subunit 6A	PSMC3			+	21.292	22.579	21.4143												Nervous system disease	Central Nervous system neoplasm		Astrocytoma																	nucleus	1.55956	0.31542	1128	0.78125	0.110005	0.53125	0.830603	0.6875	0.172614
P17987	T-complex protein 1 subunit alpha	TCP1		+	+	20.895	25.1013	23.8308	+	+	+			+						Nervous system disease	Central Nervous system neoplasm	epilepsy	Astrocytoma												Golgi			Organelli			5.06665	1.1465	397	1	3.66528e-06	0.90625	0.000760415	0.71875	0.125939
P18065	Insulin-like growth factor-binding protein 2	IGFBP2	+	+	+	28.7875	25.5954	26.4227												Nervous system disease	Central Nervous system neoplasm	epilepsy	Astrocytoma	Medulloblastoma								I31.953		plasma membrane					cytoplasm		1.13649	0.21944	1252	0.796875	0.0131095	1	0.000245038	0.671875	0.48987
P18084	Integrin beta-5	ITGB5		+	+	21.8892	26.4355	24.403	+	+	+			+						Nervous system disease	Central Nervous system neoplasm		Astrocytoma											plasma membrane							3.88737	0.89644	574	1	9.25647e-07	0.890625	0.0118421	0.90625	0.0193433
P18085	ADP-ribosylation factor 4	ARF4		+	+	21.4898	22.3689	22.802												Nervous system disease	Central Nervous system neoplasm		Astrocytoma											plasma membrane	Golgi			Organelli			0.263306	0.038827	1556	0.671875	0.211817	0.734375	0.201501	0.65625	0.624517
P18206-2;P18206	Vinculin	VCL	+	+	+	23.896	26.0666	22.7574												Nervous system disease	Central Nervous system neoplasm		Astrocytoma											plasma membrane					cytoplasm		1.25202	0.24741	1214	0.734375	0.0964078	0.671875	0.277781	0.828125	0.0201963
P18428	Lipopolysaccharide-binding protein	LBP	+	+	+	26.4942	25.3984	28.6152	+			+		+						Nervous system disease	Central Nervous system neoplasm	epilepsy	Astrocytoma																		1.26928	0.24786	1210	0.609375	0.339883	0.796875	0.0385575	0.875	0.00945276
P18577;P18577-9;P18577-8;P18577-7;P18577-11;P18577-2;P18577-5;P18577-6;P18577-14;P18577-4;P18577-10	Blood group Rh(CE) polypeptide	RHCE		+	+	21.3444	26.3507	24.7719	+	+	+			+						Nervous system disease											CD240CE			plasma membrane							3.06328	0.70652	745	0.90625	0.00213748	0.984375	0.000101893	0.625	0.294772
P18669;Q8N0Y7	Phosphoglycerate mutase 1	PGAM1	+	+	+	27.5693	28.6203	26.9177	+			+		+						Nervous system disease	Central Nervous system neoplasm		Astrocytoma																cytoplasm		3.67049	0.86038	614	0.765625	0.0411231	0.71875	0.13769	0.9375	0.00156638
P19021-4;P19021-3;P19021-6;P19021;P19021-5;P19021-2	Peptidyl-glycine alpha-amidating monooxygenase;Peptidylglycine alpha-hydroxylating monooxygenase;Peptidyl-alpha-hydroxyglycine alpha-amidating lyase	PAM	+	+	+	28.4591	24.6558	23.2529												Nervous system disease	Central Nervous system neoplasm		Astrocytoma											plasma membrane	Golgi			Organelli	cytoplasm		3.66358	0.8585	617	0.671875	0.0304663	1	2.63049e-05	0.5625	0.443812
P19022;P19022-2	Cadherin-2	CDH2	+	+	+	30.1566	27.2461	23.3166	+	+	+	+	+	+	+					Nervous system disease	Central Nervous system neoplasm	epilepsy	Astrocytoma	Medulloblastoma	Synapse						CD325			plasma membrane		endoplasmic reticulum		Organelli	cytoplasm		10.7881	2.3747	42	0.96875	0.000378335	1	6.18455e-07	0.96875	0.00114798
P19256-2;P19256-3;P19256	Lymphocyte function-associated antigen 3	CD58		+	+	21.4106	21.6831	20.5695												Nervous system disease	Central Nervous system neoplasm		Astrocytoma								CD58			plasma membrane							0.631553	0.10138	1429	0.578125	0.675183	0.710938	0.212635	0.6875	0.147877
P19320;P19320-2;P19320-3	Vascular cell adhesion protein 1	VCAM1	+		+	26.6439	23.5075	21.5476	+	+	+	+	+	+	+					Nervous system disease	Central Nervous system neoplasm	epilepsy	Astrocytoma								CD106			plasma membrane	Golgi	endoplasmic reticulum		Organelli			11.0964	2.4631	35	0.984375	5.58639e-05	1	3.07975e-06	0.859375	0.0109806
P19338;REV__P19338	Nucleolin	NCL		+	+	21.5869	22.3479	22.7501												Nervous system disease	Central Nervous system neoplasm		Astrocytoma																cytoplasm	nucleus	0.195601	0.025151	1579	0.578125	0.544295	0.71875	0.172744	0.59375	0.771405
P19397	Leukocyte surface antigen CD53	CD53		+	+	21.2932	26.11	24.799	+	+	+			+						Nervous system disease	Central Nervous system neoplasm		Astrocytoma								CD53			plasma membrane							7.32401	1.6171	178	1	1.1339e-07	0.96875	1.36894e-05	0.859375	0.057939
P19652	Alpha-1-acid glycoprotein 2	ORM2	+	+	+	32.2447	28.271	23.5462	+	+	+	+	+	+	+					Nervous system disease																					10.2428	2.1874	57	1	0.000204693	1	3.73629e-09	0.9375	0.000334869
P19823;CON__Q9TRI1	Inter-alpha-trypsin inhibitor heavy chain H2	ITIH2	+	+	+	31.3535	30.3721	30.813																												endoplasmic reticulum		Organelli			0.657035	0.10568	1422	0.664062	0.231856	0.78125	0.291125	0.5625	0.507235
P19827;P19827-2;P19827-3	Inter-alpha-trypsin inhibitor heavy chain H1	ITIH1	+	+	+	30.8087	26.5939	28.6004	+	+	+			+						Nervous system disease																					2.11656	0.47857	946	0.953125	0.00395004	0.953125	0.000191533	0.65625	0.11415
P19971;P19971-2	Thymidine phosphorylase	TYMP	+	+	+	23.0421	25.6137	26.9172												Nervous system disease	Central Nervous system neoplasm	epilepsy	Astrocytoma																		1.633	0.33898	1101	0.765625	0.0596428	0.859375	0.00515711	0.6875	0.316637
P20020-6;P20020;P20020-4;P20020-1;P20020-5;P20020-2	Plasma membrane calcium-transporting ATPase 1	ATP2B1		+	+	20.8822	25.5881	23.8467	+	+	+			+						Nervous system disease	Central Nervous system neoplasm	epilepsy	Astrocytoma		Synapse									plasma membrane					cytoplasm		4.50291	1.0162	483	1	2.78074e-07	0.875	0.0018401	0.882812	0.0264176
P20036	HLA class II histocompatibility antigen, DP alpha 1 chain	HLA-DPA1		+	+	21.3207	26.0192	23.6051	+	+				+						Nervous system disease	Central Nervous system neoplasm		Astrocytoma											plasma membrane	Golgi	endoplasmic reticulum		Organelli			3.58575	0.8388	634	1	8.81732e-06	0.78125	0.0498618	0.765625	0.0426907
P20061	Transcobalamin-1	TCN1	+	+		23.7712	20.6935	22.4207	+	+		+		+						Nervous system disease	Central Nervous system neoplasm		Astrocytoma																		2.23097	0.51997	912	0.921875	0.000413412	0.765625	0.0882544	0.890625	0.00689485
P20062;P20062-2	Transcobalamin-2	TCN2	+	+	+	25.1464	22.316	24.2929	+	+				+						Nervous system disease	Central Nervous system neoplasm	epilepsy	Astrocytoma											plasma membrane							2.20387	0.50345	923	0.828125	0.009911	0.609375	0.365582	0.734375	0.11484
P20073-2;P20073	Annexin A7	ANXA7	+	+	+	20.7397	28.1289	27.7315	+	+	+			+						Nervous system disease	Central Nervous system neoplasm	epilepsy	Astrocytoma													endoplasmic reticulum		Organelli	cytoplasm	nucleus	9.08229	2	90	1	1.88839e-08	1	2.14965e-10	0.578125	0.514396
P20618	Proteasome subunit beta type-1	PSMB1	+		+	22.6612	22.4718	21.0097												Nervous system disease	Central Nervous system neoplasm		Astrocytoma									T01.986							cytoplasm	nucleus	0.788044	0.1333	1374	0.53125	0.801649	0.75	0.100945	0.78125	0.0547971
P20645	Cation-dependent mannose-6-phosphate receptor	M6PR			+	20.8125	24.0331	22.1965	+	+				+						Nervous system disease											CD222			plasma membrane	Golgi			Organelli	cytoplasm		2.901	0.67159	773	0.9375	9.54845e-05	0.671875	0.126012	0.765625	0.0738833
P20701-2;P20701;P20701-3	Integrin alpha-L	ITGAL		+	+	21.4415	25.7059	22.4694	+	+		+		+						Nervous system disease		epilepsy									CD11a			plasma membrane							3.50064	0.80647	652	0.953125	0.000177162	0.609375	0.323077	0.890625	0.00802589
P20702;Q13349	Integrin alpha-X	ITGAX		+	+	21.3054	26.3585	22.3471	+	+				+						Nervous system disease	Central Nervous system neoplasm	epilepsy	Astrocytoma	Medulloblastoma							CD11c;CD11d			plasma membrane							6.928	1.5376	210	1	2.10429e-07	0.65625	0.216157	1	0.000148156
P20774	Mimecan	OGN	+	+	+	30.1769	26.3135	26.4496	+	+	+			+						Nervous system disease	Central Nervous system neoplasm														Golgi			Organelli			2.10373	0.47791	947	0.859375	0.00917648	0.875	0.0203243	0.5625	0.941588
P20851-2;P20851	C4b-binding protein beta chain	C4BPB	+	+	+	21.0924	21.3804	25.9428	+			+		+						Nervous system disease														plasma membrane							5.02644	1.1285	404	0.5625	0.724729	1	2.37693e-06	1	1.36e-06
P20908	Collagen alpha-1(V) chain	COL5A1	+	+	+	27.7626	23.628	29.7347	+	+				+						Nervous system disease	Central Nervous system neoplasm	epilepsy	Astrocytoma													endoplasmic reticulum		Organelli			4.299	0.97716	515	0.96875	0.00010694	0.828125	0.0643396	0.984375	3.60987e-05
P20929-3;P20929-2;P20929-4;P20929	Nebulin	NEB	+	+		21.9459	20.595	26.0198												Nervous system disease	Central Nervous system neoplasm		Astrocytoma																		3.02945	0.69497	755	0.640625	0.197773	0.84375	0.0253232	0.96875	0.00117082
P21246	Pleiotrophin	PTN		+	+	21.4459	21.4641	23.7109												Nervous system disease	Central Nervous system neoplasm		Astrocytoma		Synapse									plasma membrane		endoplasmic reticulum		Organelli			3.61093	0.84964	627	0.546875	0.967584	0.90625	0.00144241	0.96875	0.000390027
P21266	Glutathione S-transferase Mu 3	GSTM3	+	+	+	22.7232	25.3464	24.3808	+	+				+						Nervous system disease	Central Nervous system neoplasm		Astrocytoma																cytoplasm	nucleus	4.30777	0.98114	512	0.976562	0.000964863	0.71875	0.036715	0.640625	0.253325
P21281;P15313	V-type proton ATPase subunit B, brain isoform	ATP6V1B2	+		+	21.6068	23.2761	21.7879	+	+				+						Nervous system disease	Central Nervous system neoplasm	epilepsy	Astrocytoma		Synapse									plasma membrane					cytoplasm		1.44573	0.28718	1160	0.875	0.0136053	0.507812	0.75658	0.796875	0.0576895
P21333-2;P21333	Filamin-A	FLNA	+	+	+	23.2734	30.8578	27.506	+	+	+	+	+	+	+					Nervous system disease	Central Nervous system neoplasm	epilepsy	Astrocytoma	Medulloblastoma	Synapse									plasma membrane	Golgi			Organelli	cytoplasm	nucleus	9.37471	2.0801	79	1	3.23756e-05	0.90625	0.00260252	0.828125	0.00902364
P21589;P21589-2	5-nucleotidase	NT5E		+	+	21.307	23.2851	23.7447	+	+	+			+						Nervous system disease	Central Nervous system neoplasm	epilepsy	Astrocytoma								CD73			plasma membrane							2.55196	0.59872	841	0.890625	0.00637115	0.875	0.00482893	0.640625	0.598781
P21730	C5a anaphylatoxin chemotactic receptor 1	C5AR1		+	+	21.4233	22.334	22.0072												Nervous system disease	Central Nervous system neoplasm	epilepsy	Astrocytoma								CD88			plasma membrane							0.220391	0.028433	1571	0.703125	0.152531	0.671875	0.39819	0.515625	0.610658
P21741;P21741-2	Midkine	MDK		+		22.2514	20.5534	23.2242	+	+		+		+						Nervous system disease	Central Nervous system neoplasm		Astrocytoma	Medulloblastoma															cytoplasm		3.55584	0.82814	639	0.953125	0.00176748	0.71875	0.125719	1	0.000113636
P21757;P21757-2;P21757-3	Macrophage scavenger receptor types I and II	MSR1		+	+	21.452	24.276	23.2674	+	+				+						Nervous system disease	Central Nervous system neoplasm		Astrocytoma								CD204			plasma membrane							2.12347	0.48069	944	0.921875	0.0014852	0.640625	0.109551	0.609375	0.41883
P21796	Voltage-dependent anion-selective channel protein 1	VDAC1		+	+	21.3965	24.0334	22.4664												Nervous system disease	Central Nervous system neoplasm	epilepsy	Astrocytoma		Synapse									plasma membrane			mitochondrion	Organelli		nucleus	1.01195	0.19881	1285	0.75	0.048948	0.625	0.225171	0.640625	0.279027
P21810	Biglycan	BGN	+	+		22.0249	20.5716	25.5595	+			+		+						Nervous system disease	Central Nervous system neoplasm	epilepsy	Astrocytoma												Golgi			Organelli			3.48393	0.80446	656	0.71875	0.100593	0.828125	0.0211435	0.953125	0.000496324
P21926	CD9 antigen	CD9	+	+	+	21.9685	25.4662	26.822	+	+	+			+						Nervous system disease	Central Nervous system neoplasm	epilepsy	Astrocytoma								CD9			plasma membrane							6.46025	1.4371	246	0.921875	4.62247e-05	0.984375	5.99574e-06	0.84375	0.00640593
P21980;P21980-2;P21980-3	Protein-glutamine gamma-glutamyltransferase 2	TGM2	+	+	+	21.8496	25.9326	25.7977	+	+	+			+						Nervous system disease	Central Nervous system neoplasm	epilepsy	Astrocytoma											plasma membrane		endoplasmic reticulum	mitochondrion	Organelli	cytoplasm	nucleus	3.45548	0.79978	663	0.9375	0.00122426	0.953125	0.000154133	0.53125	0.906887
P22004	Bone morphogenetic protein 6	BMP6	+			24.1221	20.4632	21.4276	+	+	+			+						Nervous system disease	Central Nervous system neoplasm		Astrocytoma	Medulloblastoma															cytoplasm		4.65329	1.0472	461	1	1.87511e-05	0.96875	0.000265694	0.796875	0.0323412
P22061;P22061-2	Protein-L-isoaspartate(D-aspartate) O-methyltransferase	PCMT1	+	+	+	25.2021	26.7335	24.3865												Nervous system disease	Central Nervous system neoplasm	epilepsy	Astrocytoma																cytoplasm		0.734071	0.12331	1388	0.742188	0.0202356	0.75	0.325761	0.84375	0.0296339
P22105-1;P22105;P22105-4;P22105-2;Q16473	Tenascin-X	TNXB	+	+	+	25.1316	22.8817	28.7283	+			+		+						Nervous system disease	Central Nervous system neoplasm		Astrocytoma																		3.41334	0.78946	668	0.742188	0.0833186	0.8125	0.0317173	0.953125	0.00102972
P22234;P22234-2	Multifunctional protein ADE2;Phosphoribosylaminoimidazole-succinocarboxamide synthase;Phosphoribosylaminoimidazole carboxylase	PAICS			+	22.0315	21.9972	20.8506												Nervous system disease	Central Nervous system neoplasm		Astrocytoma																cytoplasm		0.792696	0.13639	1372	0.65625	0.945982	0.859375	0.00725774	0.828125	0.0593132
P22304;P22304-3;P22304-2	Iduronate 2-sulfatase;Iduronate 2-sulfatase 42 kDa chain;Iduronate 2-sulfatase 14 kDa chain	IDS	+			24.6597	20.175	21.2701	+	+	+	+	+	+	+					Nervous system disease	Central Nervous system neoplasm		Astrocytoma	Medulloblastoma															cytoplasm		10.2575	2.2143	56	1	8.96936e-09	1	1.34457e-07	0.875	0.00777383
P22314-2;P22314	Ubiquitin-like modifier-activating enzyme 1	UBA1	+	+	+	22.2506	26.4256	23.5061	+	+				+						Nervous system disease	Central Nervous system neoplasm		Astrocytoma														mitochondrion	Organelli	cytoplasm	nucleus	2.70982	0.63118	815	0.9375	0.000929441	0.671875	0.281591	0.8125	0.0243744
P22352;P59796;O75715	Glutathione peroxidase 3	GPX3	+	+	+	28.0226	22.3109	22.7631	+	+	+			+						Nervous system disease	Central Nervous system neoplasm	epilepsy	Astrocytoma																		5.31764	1.1944	369	1	8.22236e-05	1	6.10912e-06	0.625	0.717143
P22392-2;P22392;O60361	Nucleoside diphosphate kinase B;Putative nucleoside diphosphate kinase	NME2;NME2P1	+	+	+	24.1188	27.9521	25.9964	+	+				+								epilepsy																	cytoplasm	nucleus	2.32089	0.53902	896	0.890625	0.00187821	0.8125	0.0536598	0.828125	0.0277474
P22626-2;P22626	Heterogeneous nuclear ribonucleoproteins A2/B1	HNRNPA2B1			+	20.9983	22.9856	21.4691	+	+		+		+						Nervous system disease	Central Nervous system neoplasm	epilepsy	Astrocytoma																cytoplasm	nucleus	5.15578	1.1675	386	0.90625	0.00317608	0.65625	0.361181	0.890625	0.0114251
P22692;P22692-2	Insulin-like growth factor-binding protein 4	IGFBP4	+			24.1387	20.342	21.2548	+	+	+			+						Nervous system disease	Central Nervous system neoplasm		Astrocytoma									I31.952				endoplasmic reticulum		Organelli			5.2731	1.19	374	0.921875	0.000161558	0.90625	0.00414397	0.726562	0.0849534
P22695	Cytochrome b-c1 complex subunit 2, mitochondrial	UQCRC2			+	21.4765	23.5622	20.4395	+	+	+	+	+	+	+					Nervous system disease	Central Nervous system neoplasm	epilepsy										M16.974					mitochondrion	Organelli			9.10852	2.0033	88	0.890625	0.0107143	0.851562	0.0191448	1	0.000846779
P22732;REV__Q9H1R3	Solute carrier family 2, facilitated glucose transporter member 5	SLC2A5		+	+	21.0853	24.0737	23.1854	+	+				+						Nervous system disease	Central Nervous system neoplasm		Astrocytoma											plasma membrane							1.58428	0.32299	1121	0.953125	0.000907074	0.84375	0.0489339	0.671875	0.40012
P22792	Carboxypeptidase N subunit 2	CPN2	+	+	+	26.5213	23.1897	25.3076	+	+				+						Nervous system disease												M14.004									1.51486	0.3014	1139	0.84375	0.0102694	0.5625	0.366074	0.703125	0.202565
P22891;P22891-2	Vitamin K-dependent protein Z	PROZ	+	+	+	22.2944	25.6112	24.9299	+	+				+						Nervous system disease												S01.979			Golgi	endoplasmic reticulum		Organelli			1.28158	0.25481	1204	0.875	0.0127745	0.84375	0.0251637	0.59375	0.648554
P23083	Ig heavy chain V-I region V35		+	+		25.2496	20.846	25.4982	+	+		+		+																				plasma membrane							4.11386	0.94422	538	0.84375	0.00110278	0.59375	0.83685	1	2.29165e-06
P23142;P23142-2;P23142-3	Fibulin-1	FBLN1	+	+	+	31.0772	29.4181	30.1514												Nervous system disease	Central Nervous system neoplasm		Astrocytoma	Medulloblastoma																	1.38739	0.27623	1178	0.71875	0.0659558	0.84375	0.0150588	0.640625	0.37402
P23142-4	Fibulin-1	FBLN1	+	+	+	30.0894	27.8296	28.1517												Nervous system disease	Central Nervous system neoplasm		Astrocytoma	Medulloblastoma																	0.662404	0.10572	1421	0.71875	0.078404	0.859375	0.10742	0.515625	0.842907
P23229-4;P23229-2;P23229-9;P23229-6;P23229-5;P23229-3;P23229;P23229-7	Integrin alpha-6;Integrin alpha-6 heavy chain;Integrin alpha-6 light chain;Processed integrin alpha-6	ITGA6		+	+	21.5971	22.967	22.5884												Nervous system disease	Central Nervous system neoplasm	epilepsy	Astrocytoma								CD49f			plasma membrane							1.11999	0.21773	1255	0.671875	0.130074	0.6875	0.189054	0.515625	0.68752
P23276	Kell blood group glycoprotein	KEL			+	21.224	24.5649	21.3033												Nervous system disease	Central Nervous system neoplasm	epilepsy	Astrocytoma	Medulloblastoma							CD238	M13.090		plasma membrane	Golgi			Organelli			1.71076	0.36029	1075	0.703125	0.0472571	0.5	0.889571	0.734375	0.051064
P23284	Peptidyl-prolyl cis-trans isomerase B	PPIB	+	+	+	26.3551	25.6351	25.1655												Nervous system disease	Central Nervous system neoplasm	epilepsy	Astrocytoma													endoplasmic reticulum		Organelli	cytoplasm	nucleus	0.908762	0.17303	1324	0.625	0.401348	0.765625	0.064908	0.59375	0.625281
P23381;P23381-2	Tryptophan--tRNA ligase, cytoplasmic;T1-TrpRS;T2-TrpRS	WARS	+	+	+	24.4799	23.9925	26.1302												Nervous system disease	Central Nervous system neoplasm	epilepsy	Astrocytoma																cytoplasm	nucleus	0.633954	0.10251	1427	0.59375	0.592178	0.671875	0.222131	0.75	0.0988642
P23458;P29597	Tyrosine-protein kinase JAK1	JAK1			+	21.0206	21.286	21.7182												Nervous system disease	Central Nervous system neoplasm	epilepsy	Astrocytoma	Medulloblastoma									JAK1;TYK2	plasma membrane					cytoplasm	nucleus	0.198684	0.025362	1578	0.609375	0.504666	0.671875	0.195548	0.578125	0.350502
P23468-7;P23468-5;P23468-6;P23468;P23468-4;P23468-2;P23468-3	Receptor-type tyrosine-protein phosphatase delta	PTPRD	+			26.26	20.6827	22.1239	+	+	+	+	+	+	+					Nervous system disease	Central Nervous system neoplasm	epilepsy	Astrocytoma	Medulloblastoma	Synapse									plasma membrane							10.4833	2.3033	49	1	2.70221e-09	1	4.58222e-07	0.90625	0.00318648
P23470-2;P23470	Receptor-type tyrosine-protein phosphatase gamma	PTPRG	+		+	26.2409	20.9089	21.2248	+	+	+			+						Nervous system disease	Central Nervous system neoplasm	epilepsy	Astrocytoma											plasma membrane							6.9788	1.5521	202	1	1.52376e-06	1	9.96276e-07	0.625	0.530703
P23471;P23471-2;P23471-3	Receptor-type tyrosine-protein phosphatase zeta	PTPRZ1	+	+	+	29.8999	24.7936	25.3267	+	+	+			+						Nervous system disease	Central Nervous system neoplasm		Astrocytoma											plasma membrane							4.61687	1.0317	470	1	1.15367e-05	1	4.31804e-07	0.609375	0.550426
P23515	Oligodendrocyte-myelin glycoprotein	OMG	+	+	+	24.9868	22.0095	23.1386	+	+				+						Nervous system disease	Central Nervous system neoplasm		Astrocytoma	Medulloblastoma										plasma membrane							1.89645	0.41774	1008	0.828125	0.0182085	0.71875	0.118104	0.65625	0.289558
P23526;P23526-2	Adenosylhomocysteinase	AHCY	+	+	+	21.9623	25.3002	24.0271	+	+	+			+						Nervous system disease	Central Nervous system neoplasm	epilepsy																			2.70974	0.63067	816	0.890625	0.00785895	0.8125	0.0227657	0.578125	0.220959
P23528	Cofilin-1	CFL1	+	+	+	26.5257	27.3038	26.7863												Nervous system disease	Central Nervous system neoplasm	epilepsy	Astrocytoma																cytoplasm	nucleus	0.312252	0.049283	1535	0.59375	0.204388	0.546875	0.627255	0.734375	0.125903
P23560;P23560-2;P23560-3;P23560-5;P23560-4	Brain-derived neurotrophic factor	BDNF	+			23.6617	20.1263	21.8141	+	+	+	+	+	+	+					Nervous system disease	Central Nervous system neoplasm	epilepsy	Astrocytoma	Medulloblastoma	Synapse											endoplasmic reticulum		Organelli	cytoplasm		9.27675	2.0566	82	1	6.8384e-06	0.859375	0.0196427	0.9375	0.00619165
P23582	C-type natriuretic peptide;CNP-22;CNP-29;CNP-53	NPPC	+			23.7855	20.4241	21.0291	+	+	+			+						Nervous system disease	Central Nervous system neoplasm	epilepsy																			2.75412	0.63789	806	0.921875	6.44522e-05	0.9375	0.00184213	0.5625	0.285723
P23634-7;P23634-6;P23634-8;P23634;P23634-5;P23634-4;P23634-3;P23634-2	Plasma membrane calcium-transporting ATPase 4	ATP2B4			+	21.9668	23.9909	21.2326	+	+		+		+						Nervous system disease	Central Nervous system neoplasm	epilepsy	Astrocytoma		Synapse									plasma membrane							2.45579	0.57855	862	0.828125	0.0169033	0.609375	0.356418	0.921875	0.00177047
P23677	Inositol-trisphosphate 3-kinase A	ITPKA				21.2504	20.6864	21.2614												Nervous system disease	Central Nervous system neoplasm		Astrocytoma	Medulloblastoma	Synapse														cytoplasm	nucleus	6.41718	1.42	254	0.671875	0.283258	0.515625	0.981622	0.703125	0.163055
P24043	Laminin subunit alpha-2	LAMA2	+	+		22.1788	20.5851	26.6806	+			+		+						Nervous system disease	Central Nervous system neoplasm	epilepsy	Astrocytoma		Synapse																3.00594	0.68503	763	0.804688	0.06182	0.8125	0.0265689	0.9375	0.00297443
P24158	Myeloblastin	PRTN3		+	+	21.5948	23.2314	23.1126												Nervous system disease	Central Nervous system neoplasm	epilepsy	Astrocytoma									S01.134		plasma membrane							0.737012	0.12415	1387	0.75	0.0772762	0.6875	0.113483	0.5	0.905117
P24592	Insulin-like growth factor-binding protein 6	IGFBP6	+	+	+	26.996	21.813	22.9542	+	+	+			+						Nervous system disease	Central Nervous system neoplasm		Astrocytoma									I31.952			Golgi			Organelli			3.61453	0.85065	626	0.96875	0.000315747	0.921875	0.000996707	0.625	0.368487
P24593	Insulin-like growth factor-binding protein 5	IGFBP5	+	+	+	25.3028	23.8026	24.5483												Nervous system disease	Central Nervous system neoplasm		Astrocytoma	Medulloblastoma								I31.952				endoplasmic reticulum		Organelli			0.511527	0.082416	1469	0.71875	0.100212	0.609375	0.313339	0.625	0.46146
P24821;P24821-4;P24821-3;P24821-2;P24821-5;P24821-6	Tenascin	TNC	+	+	+	28.6406	29.2443	31.2915												Nervous system disease	Central Nervous system neoplasm	epilepsy	Astrocytoma	Medulloblastoma	Synapse											endoplasmic reticulum		Organelli			1.24059	0.2436	1218	0.5625	0.619062	0.78125	0.0235875	0.734375	0.109207
P24941-2;P24941	Cyclin-dependent kinase 2	CDK2		+		21.5452	21.1093	23.2282	+			+		+						Nervous system disease	Central Nervous system neoplasm	epilepsy	Astrocytoma	Medulloblastoma									CDK2						cytoplasm	nucleus	1.91843	0.41985	1004	0.671875	0.340675	0.875	0.00940182	0.921875	0.000997546
P25311	Zinc-alpha-2-glycoprotein	AZGP1	+	+	+	31.3248	26.2942	22.4894	+	+	+			+						Nervous system disease	Central Nervous system neoplasm	epilepsy	Astrocytoma											plasma membrane						nucleus	6.98149	1.5522	201	1	5.12074e-05	1	8.7061e-09	0.90625	0.00321208
P25325;P25325-2	3-mercaptopyruvate sulfurtransferase	MPST		+	+	21.3839	23.2172	22.0122												Nervous system disease	Central Nervous system neoplasm		Astrocytoma														mitochondrion	Organelli			0.702948	0.12055	1398	0.71875	0.0807392	0.609375	0.322306	0.625	0.285232
P25705;P25705-2;P25705-3	ATP synthase subunit alpha, mitochondrial	ATP5A1		+	+	21.8445	22.7554	24.6126												Nervous system disease	Central Nervous system neoplasm		Astrocytoma											plasma membrane			mitochondrion	Organelli		nucleus	2.17209	0.49695	928	0.5625	0.556862	0.90625	0.000972652	0.640625	0.274033
P25713	Metallothionein-3	MT3	+			21.6457	20.6191	21.8024												Nervous system disease	Central Nervous system neoplasm		Astrocytoma	Medulloblastoma	Synapse									plasma membrane		endoplasmic reticulum		Organelli	cytoplasm		0.233307	0.030388	1566	0.6875	0.21159	0.53125	0.845152	0.8125	0.0280784
P25774-2;P25774	Cathepsin S	CTSS	+			24.1121	20.5568	21.3093	+	+	+			+						Nervous system disease	Central Nervous system neoplasm	epilepsy	Astrocytoma									C01.034									4.67186	1.0613	457	1	3.78726e-05	0.984375	0.000853362	0.703125	0.103026
P25786;P25786-2	Proteasome subunit alpha type-1	PSMA1	+	+	+	23.4186	24.0727	22.5834												Nervous system disease	Central Nervous system neoplasm		Astrocytoma									T01.976							cytoplasm	nucleus	0.796222	0.14051	1368	0.65625	0.474981	0.625	0.44087	0.71875	0.0974085
P25787	Proteasome subunit alpha type-2	PSMA2	+		+	23.7201	21.6714	21.0007												Nervous system disease	Central Nervous system neoplasm		Astrocytoma									T01.972							cytoplasm	nucleus	1.93718	0.42702	991	0.78125	0.0376242	0.890625	0.00404844	0.609375	0.397764
P25788-2;P25788	Proteasome subunit alpha type-3	PSMA3	+		+	21.7387	23.5114	21.8337												Nervous system disease	Central Nervous system neoplasm		Astrocytoma									T01.977							cytoplasm	nucleus	0.728861	0.123	1390	0.796875	0.0390295	0.53125	0.929264	0.765625	0.0826195
P25789	Proteasome subunit alpha type-4	PSMA4	+		+	21.5667	22.4674	21.3741												Nervous system disease	Central Nervous system neoplasm		Astrocytoma									T01.973							cytoplasm	nucleus	0.25537	0.035701	1561	0.71875	0.217202	0.515625	0.826028	0.703125	0.151271
P25940	Collagen alpha-3(V) chain	COL5A3		+		20.9468	20.959	24.7186	+			+		+						Nervous system disease																endoplasmic reticulum		Organelli			4.81854	1.0798	440	0.5625	0.98076	0.953125	0.000205928	0.96875	6.30409e-05
P26022	Pentraxin-related protein PTX3	PTX3	+	+	+	21.5474	21.4937	24.9995													Central Nervous system neoplasm	epilepsy	Astrocytoma	Medulloblastoma																	2.72594	0.63395	811	0.515625	0.963165	0.96875	0.000725642	0.859375	0.00227992
P26038;REV__Q92752;REV__Q92752-2	Moesin	MSN	+	+	+	27.2295	30.5356	28.872	+	+	+			+						Nervous system disease	Central Nervous system neoplasm	epilepsy	Astrocytoma											plasma membrane					cytoplasm	nucleus	3.92763	0.90794	563	0.984375	8.8234e-06	0.8125	0.0127884	0.875	0.00278535
P26447	Protein S100-A4	S100A4	+	+	+	22.4422	27.5648	24.8793	+	+				+						Nervous system disease	Central Nervous system neoplasm		Astrocytoma	Medulloblastoma															cytoplasm	nucleus	3.31911	0.77263	688	0.921875	0.000984376	0.765625	0.0512205	0.8125	0.0196371
P26572	Alpha-1,3-mannosyl-glycoprotein 2-beta-N-acetylglucosaminyltransferase	MGAT1	+	+	+	25.2237	24.4694	25.831												Nervous system disease	Central Nervous system neoplasm		Astrocytoma												Golgi	endoplasmic reticulum		Organelli	cytoplasm		0.229719	0.029133	1568	0.75	0.375539	0.734375	0.0639452	0.75	0.117714
P26583	High mobility group protein B2	HMGB2		+	+	21.3151	24.4046	21.3359	+	+		+		+						Nervous system disease	Central Nervous system neoplasm		Astrocytoma	Medulloblastoma															cytoplasm	nucleus	3.33361	0.77328	685	0.953125	0.00431276	0.554688	0.972528	0.921875	0.00763375
P26599;P26599-2;P26599-3;O95758-7;O95758-6;O95758-2;O95758;O95758-5;O95758-4	Polypyrimidine tract-binding protein 1	PTBP1	+		+	21.4253	23.9091	21.1598	+	+				+						Nervous system disease	Central Nervous system neoplasm		Astrocytoma																	nucleus	2.17553	0.498	927	0.890625	0.00448411	0.546875	0.672352	0.9375	0.000677827
P26641;P26641-2	Elongation factor 1-gamma	EEF1G	+	+	+	21.6714	25.0993	24.5106	+	+	+			+						Nervous system disease	Central Nervous system neoplasm		Astrocytoma																cytoplasm	nucleus	2.20729	0.50441	921	0.953125	7.52267e-05	0.859375	0.0102768	0.5	0.540584
P26927	Hepatocyte growth factor-like protein;Hepatocyte growth factor-like protein alpha chain;Hepatocyte growth factor-like protein beta chain	MST1	+		+	24.2716	21.1584	21.8944	+	+	+			+						Nervous system disease	Central Nervous system neoplasm		Astrocytoma									S01.975									3.50342	0.8091	651	0.90625	0.000814805	0.84375	0.0066156	0.71875	0.145267
P26992	Ciliary neurotrophic factor receptor subunit alpha	CNTFR	+			23.4979	20.6576	21.8368	+	+	+	+	+	+	+					Nervous system disease	Central Nervous system neoplasm		Astrocytoma											plasma membrane							9.2317	2.0249	85	1	1.41799e-06	0.898438	0.00248429	0.828125	0.0122873
P27105;P27105-2	Erythrocyte band 7 integral membrane protein	STOM	+	+	+	22.2442	30.7437	27.8183	+	+	+			+						Nervous system disease	Central Nervous system neoplasm													plasma membrane		endoplasmic reticulum	mitochondrion	Organelli	cytoplasm		7.7744	1.6805	153	1	3.23475e-06	0.96875	9.96785e-05	0.8125	0.0157147
P27169	Serum paraoxonase/arylesterase 1	PON1	+	+	+	28.2177	24.4745	25.5295	+	+				+						Nervous system disease	Central Nervous system neoplasm	epilepsy	Astrocytoma													endoplasmic reticulum		Organelli			1.59423	0.32551	1118	0.890625	0.0161363	0.875	0.0625371	0.578125	0.378871
P27348	14-3-3 protein theta	YWHAQ	+	+	+	24.7496	23.3083	24.3808	+	+				+						Nervous system disease																			cytoplasm		0.679404	0.11559	1408	0.875	0.00386634	0.59375	0.405958	0.828125	0.0334431
P27635;Q96L21	60S ribosomal protein L10	RPL10		+	+	21.5954	22.3009	22.9588												Nervous system disease	Central Nervous system neoplasm	epilepsy	Astrocytoma	Medulloblastoma												endoplasmic reticulum		Organelli		nucleus	3.06201	0.70544	747	0.71875	0.136647	0.859375	0.00956634	0.734375	0.124929
P27701-2;P27701	CD82 antigen	CD82		+	+	21.3637	23.649	23.4389	+	+	+			+						Nervous system disease	Central Nervous system neoplasm										CD82			plasma membrane							1.23708	0.23915	1220	0.859375	0.00500492	0.78125	0.0156525	0.5	0.820603
P27797	Calreticulin	CALR	+	+	+	27.4597	30.7552	27.4058	+	+				+						Nervous system disease	Central Nervous system neoplasm	epilepsy	Astrocytoma	Medulloblastoma										plasma membrane	Golgi	endoplasmic reticulum		Organelli	cytoplasm	nucleus	3.40345	0.78928	669	0.953125	0.00153026	0.609375	0.957126	0.828125	0.0191574
P27824;P27824-2;P27824-3;O14967	Calnexin	CANX	+	+	+	21.3261	26.0468	22.8672	+	+				+						Nervous system disease	Central Nervous system neoplasm	epilepsy	Astrocytoma	Medulloblastoma	Synapse											endoplasmic reticulum		Organelli	cytoplasm		2.86122	0.66302	781	0.890625	0.00146661	0.75	0.111431	0.84375	0.0238646
P28062-2;P28062	Proteasome subunit beta type-8	PSMB8			+	21.495	22.2623	20.7536	+			+		+						Nervous system disease	Central Nervous system neoplasm	epilepsy	Astrocytoma									T01.015								nucleus	0.842748	0.15564	1345	0.6875	0.135687	0.65625	0.254648	0.875	0.00827226
P28066;P28066-2	Proteasome subunit alpha type-5	PSMA5	+	+	+	22.3919	25.8231	22.1211	+	+				+						Nervous system disease	Central Nervous system neoplasm	epilepsy	Astrocytoma									T01.975							cytoplasm	nucleus	1.96597	0.4407	980	0.875	0.00684927	0.53125	0.777933	0.9375	0.00132533
P28074;P28074-3;P28074-2	Proteasome subunit beta type-5	PSMB5	+		+	21.4586	22.3339	20.8775												Nervous system disease	Central Nervous system neoplasm		Astrocytoma								CD79a	T01.012							cytoplasm	nucleus	0.336317	0.053492	1529	0.6875	0.366273	0.578125	0.56715	0.796875	0.0767963
P28161-2;P28161	Glutathione S-transferase Mu 2	GSTM2	+	+	+	21.5799	23.3711	23.298	+	+				+						Nervous system disease	Central Nervous system neoplasm		Astrocytoma																cytoplasm		0.506396	0.082252	1471	0.859375	0.0211871	0.625	0.136763	0.546875	0.950294
P28289;P28289-2;Q9NZQ9-2;Q9NZQ9	Tropomodulin-1	TMOD1			+	21.3712	22.0627	21.1629												Nervous system disease	Central Nervous system neoplasm		Astrocytoma																		0.170856	0.022265	1585	0.546875	0.41568	0.59375	0.668698	0.625	0.291588
P28482;P28482-2;P31152	Mitogen-activated protein kinase 1	MAPK1		+	+	21.2257	25.6381	23.1322	+	+				+						Nervous system disease	Central Nervous system neoplasm	epilepsy	Astrocytoma	Medulloblastoma	Synapse	Synaptosome		Cholinergic synapse	Serotonergic synapse	Glutamatergic synapse			MAPK1;MAPK4	plasma membrane	Golgi	endoplasmic reticulum	mitochondrion	Organelli	cytoplasm	nucleus	4.02067	0.92932	550	0.984375	1.49954e-05	0.75	0.0438531	0.8125	0.0192336
P28676	Grancalcin	GCA		+	+	21.0304	26.3361	25.5856	+	+	+			+																				plasma membrane					cytoplasm		4.2382	0.95896	523	1	1.54951e-05	1	1.67498e-06	0.671875	0.439356
P28838-2;P28838	Cytosol aminopeptidase	LAP3	+	+	+	22.2153	25.7037	26.4381	+	+	+			+						Nervous system disease	Central Nervous system neoplasm	epilepsy	Astrocytoma									M17.001							cytoplasm	nucleus	4.69278	1.0666	453	0.9375	0.000889295	0.953125	0.000352148	0.640625	0.35956
P28907;P28907-2	ADP-ribosyl cyclase/cyclic ADP-ribose hydrolase 1	CD38			+	21.9022	24.4755	21.3497	+			+		+						Nervous system disease	Central Nervous system neoplasm	epilepsy	Astrocytoma		Synapse						CD38			plasma membrane						nucleus	3.01307	0.69423	758	0.796875	0.0179717	0.609375	0.338421	0.84375	0.00767256
P29144	Tripeptidyl-peptidase 2	TPP2	+		+	25.9969	22.5992	21.9046	+	+	+			+						Nervous system disease												S08.A56							cytoplasm		5.48459	1.2371	349	0.953125	0.000463234	1	2.02441e-06	0.59375	0.325908
P29218-3;P29218;P29218-2	Inositol monophosphatase 1	IMPA1	+		+	22.2672	21.153	21.5846												Nervous system disease	Central Nervous system neoplasm	epilepsy																	cytoplasm		1.92501	0.42534	997	0.71875	0.0863469	0.65625	0.384507	0.578125	0.521724
P29350-2;P29350;P29350-3;P29350-4	Tyrosine-protein phosphatase non-receptor type 6	PTPN6			+	21.3052	22.4408	21.0218	+			+		+						Nervous system disease	Central Nervous system neoplasm		Astrocytoma																cytoplasm	nucleus	0.629416	0.10127	1431	0.75	0.0760926	0.515625	0.660513	0.859375	0.00802369
P29401;P29401-2	Transketolase	TKT	+	+	+	26.7483	25.8985	25.0175												Nervous system disease	Central Nervous system neoplasm		Astrocytoma								CD167b					endoplasmic reticulum		Organelli			0.377839	0.061025	1518	0.71875	0.220656	0.90625	0.00913005	0.640625	0.201508
P29622	Kallistatin	SERPINA4	+	+	+	27.8518	23.6816	25.2957	+	+	+			+						Nervous system disease	Central Nervous system neoplasm	epilepsy	Astrocytoma									I04.003									1.9521	0.4312	986	0.96875	0.000961399	0.921875	0.00499016	0.75	0.109922
P29692-2;P29692;P29692-4	Elongation factor 1-delta	EEF1D		+	+	20.7687	24.5932	22.5857	+	+				+						Nervous system disease	Central Nervous system neoplasm	epilepsy	Astrocytoma	Medulloblastoma															cytoplasm	nucleus	2.01351	0.44985	973	0.953125	0.000688371	0.75	0.0706107	0.796875	0.130489
P29966	Myristoylated alanine-rich C-kinase substrate	MARCKS	+	+	+	26.2734	27.7593	27.0685	+	+				+						Nervous system disease	Central Nervous system neoplasm		Astrocytoma											plasma membrane					cytoplasm		7.28438	1.6075	181	0.875	0.00529445	0.78125	0.0505799	0.75	0.102007
P29972;P29972-4;P29972-2;P29972-3	Aquaporin-1	AQP1	+	+	+	22.3054	28.4738	25.3694	+	+				+						Nervous system disease	Central Nervous system neoplasm		Astrocytoma	Medulloblastoma										plasma membrane					cytoplasm	nucleus	4.69466	1.0693	452	1	1.36428e-06	0.65625	0.0703661	0.75	0.0721308
P30041	Peroxiredoxin-6	PRDX6	+	+	+	27.6251	30.4082	29.1791	+	+				+						Nervous system disease	Central Nervous system neoplasm		Astrocytoma														mitochondrion	Organelli	cytoplasm	nucleus	2.45064	0.57584	864	0.890625	0.00426522	0.8125	0.0379534	0.703125	0.122758
P30043	Flavin reductase (NADPH)	BLVRB	+	+	+	27.3651	31.1315	29.3388												Nervous system disease	Central Nervous system neoplasm			Medulloblastoma										plasma membrane							1.62917	0.33441	1105	0.78125	0.016684	0.75	0.111979	0.671875	0.216913
P30044-2;P30044;P30044-3;P30044-4	Peroxiredoxin-5, mitochondrial	PRDX5	+	+	+	24.5686	26.6563	26.175	+	+				+						Nervous system disease	Central Nervous system neoplasm		Astrocytoma														mitochondrion	Organelli	cytoplasm	nucleus	1.44197	0.28516	1164	0.8125	0.0216341	0.78125	0.0910359	0.59375	0.347281
P30046;P30046-2;A6NHG4	D-dopachrome decarboxylase;D-dopachrome decarboxylase-like protein	DDT;DDTL	+		+	23.8276	24.1657	21.1708	+			+		+						Nervous system disease	Central Nervous system neoplasm		Astrocytoma																cytoplasm		1.37751	0.27297	1181	0.578125	0.800088	0.796875	0.0164708	0.867188	0.0116088
P30048-2;P30048	Thioredoxin-dependent peroxide reductase, mitochondrial	PRDX3	+		+	22.8277	22.1951	21.06												Nervous system disease	Central Nervous system neoplasm		Astrocytoma	Medulloblastoma										plasma membrane			mitochondrion	Organelli	cytoplasm		1.11824	0.2177	1256	0.640625	0.361002	0.796875	0.0332873	0.75	0.0949637
P30085-3;P30085;P30085-2	UMP-CMP kinase	CMPK1		+	+	21.0539	23.6816	22.0455	+	+				+						Nervous system disease																			cytoplasm	nucleus	2.54412	0.59847	842	0.859375	0.00486709	0.6875	0.212876	0.78125	0.0443647
P30086	Phosphatidylethanolamine-binding protein 1;Hippocampal cholinergic neurostimulating peptide	PEBP1	+	+	+	29.781	29.4754	28.3284												Nervous system disease	Central Nervous system neoplasm	epilepsy	Astrocytoma									I51.002								nucleus	2.02917	0.45939	964	0.648438	0.39326	0.867188	0.00412184	0.796875	0.0278459
P30101	Protein disulfide-isomerase A3	PDIA3	+		+	24.7197	25.5704	21.5855	+			+		+						Nervous system disease	Central Nervous system neoplasm		Astrocytoma													endoplasmic reticulum		Organelli		nucleus	3.49163	0.80572	654	0.796875	0.404104	1	5.04315e-05	0.875	0.00127347
P30153	Serine/threonine-protein phosphatase 2A 65 kDa regulatory subunit A alpha isoform	PPP2R1A		+	+	21.2262	27	26.7906	+	+	+			+						Nervous system disease														plasma membrane			mitochondrion	Organelli	cytoplasm	nucleus	5.91662	1.3054	305	1	5.33892e-06	1	1.50099e-06	0.546875	0.831792
P30273	High affinity immunoglobulin epsilon receptor subunit gamma	FCER1G		+	+	21.1404	24.3869	23.7853	+	+				+						Nervous system disease	Central Nervous system neoplasm	epilepsy	Astrocytoma											plasma membrane							2.59309	0.60425	834	0.90625	0.00329471	0.78125	0.0258427	0.578125	0.61402
P30530-2;P30530	Tyrosine-protein kinase receptor UFO	AXL	+	+	+	25.7666	25.4003	22.8525												Nervous system disease	Central Nervous system neoplasm	epilepsy	Astrocytoma										AXL	plasma membrane							2.58792	0.60364	835	0.625	0.806634	0.78125	0.0194711	0.6875	0.114893
P30566;P30566-2	Adenylosuccinate lyase	ADSL		+	+	20.7899	23.6888	22.799												Nervous system disease	Central Nervous system neoplasm	epilepsy																			1.14583	0.22187	1248	0.765625	0.0367383	0.78125	0.0486464	0.546875	0.557852
P30613;P30613-2	Pyruvate kinase PKLR	PKLR	+		+	22.2374	22.366	22.3901												Nervous system disease	Central Nervous system neoplasm	epilepsy	Astrocytoma																cytoplasm		0.20253	0.027308	1575	0.609375	0.900292	0.570312	0.871137	0.53125	0.985217
P30626;P30626-2;P30626-3	Sorcin	SRI	+	+	+	22.2926	29.4904	28.5467	+	+	+			+						Nervous system disease	Central Nervous system neoplasm		Astrocytoma													endoplasmic reticulum		Organelli	cytoplasm		8.11138	1.7666	129	1	3.07186e-06	1	1.98723e-06	0.640625	0.416461
P30740;P30740-2;O75830	Leukocyte elastase inhibitor	SERPINB1	+	+	+	24.0362	23.645	22.9954												Nervous system disease	Central Nervous system neoplasm		Astrocytoma	Medulloblastoma								I04.006;I04.026							cytoplasm		0.165561	0.020844	1587	0.546875	0.722377	0.671875	0.323396	0.625	0.453682
P30990	Neurotensin/neuromedin N;Large neuromedin N;Neuromedin N;Neurotensin;Tail peptide	NTS	+	+		22.1576	20.9296	21.5744												Nervous system disease	Central Nervous system neoplasm	epilepsy	Astrocytoma																		0.598791	0.096198	1441	0.71875	0.112218	0.578125	0.545661	0.578125	0.436003
P31146	Coronin-1A	CORO1A	+	+	+	25.2007	25.8002	26.1283												Nervous system disease	Central Nervous system neoplasm			Medulloblastoma										plasma membrane					cytoplasm		3.03449	0.69578	753	0.75	0.324481	0.703125	0.164078	0.59375	0.648003
P31150	Rab GDP dissociation inhibitor alpha	GDI1	+	+	+	26.4422	21.6332	21.4369	+	+	+			+						Nervous system disease															Golgi			Organelli	cytoplasm		6.17544	1.3561	277	1	1.16602e-07	1	6.55379e-07	0.515625	0.759522
P31151	Protein S100-A7	S100A7	+		+	24.7478	21.4714	21.4853	+	+	+			+						Nervous system disease																endoplasmic reticulum		Organelli	cytoplasm	nucleus	3.47124	0.80386	658	0.984375	8.37899e-05	1	1.252e-05	0.578125	0.980533
P31939-2;P31939	Bifunctional purine biosynthesis protein PURH;Phosphoribosylaminoimidazolecarboxamide formyltransferase;IMP cyclohydrolase	ATIC		+	+	21.5456	24.0172	22.6426	+	+				+						Nervous system disease		epilepsy												plasma membrane							0.746701	0.12584	1384	0.859375	0.00940604	0.671875	0.197648	0.65625	0.214858
P31943;P55795	Heterogeneous nuclear ribonucleoprotein H;Heterogeneous nuclear ribonucleoprotein H, N-terminally processed	HNRNPH1			+	21.5558	22.5488	21.7206	+	+				+						Nervous system disease	Central Nervous system neoplasm		Astrocytoma		Synapse															nucleus	3.02476	0.69464	756	0.828125	0.0139127	0.546875	0.716054	0.765625	0.0544804
P31944	Caspase-14;Caspase-14 subunit p17, mature form;Caspase-14 subunit p10, mature form;Caspase-14 subunit p20, intermediate form;Caspase-14 subunit p8, intermediate form	CASP14	+		+	25.3444	22.5136	21.2134	+	+	+			+						Nervous system disease	Central Nervous system neoplasm	epilepsy	Astrocytoma									C14.018					mitochondrion	Organelli	cytoplasm	nucleus	6.13702	1.3536	279	0.90625	0.00121368	1	1.27449e-07	0.796875	0.0615525
P31946-2;P31946	14-3-3 protein beta/alpha;14-3-3 protein beta/alpha, N-terminally processed	YWHAB	+	+	+	25.0744	26.8696	25.6045	+	+		+		+						Nervous system disease																			cytoplasm		0.626396	0.10033	1433	0.84375	0.00953142	0.703125	0.388663	0.875	0.00573171
P31947-2;P31947	14-3-3 protein sigma	SFN	+		+	23.9111	23.958	20.9507												Nervous system disease	Central Nervous system neoplasm	epilepsy	Astrocytoma																cytoplasm	nucleus	3.61481	0.85394	625	0.515625	0.950601	0.890625	0.000506087	1	3.60446e-05
P31948-2;P31948;P31948-3	Stress-induced-phosphoprotein 1	STIP1	+	+	+	22.0278	24.8175	23.6961	+	+				+						Nervous system disease	Central Nervous system neoplasm		Astrocytoma												Golgi			Organelli		nucleus	0.799236	0.14056	1367	0.875	0.00502614	0.734375	0.101164	0.671875	0.211469
P31949	Protein S100-A11;Protein S100-A11, N-terminally processed	S100A11	+	+	+	26.3755	26.1849	26.0747												Nervous system disease	Central Nervous system neoplasm		Astrocytoma																cytoplasm	nucleus	7.90838	1.7226	144	0.546875	0.6586	0.515625	0.54882	0.53125	0.832194
P31997;P06731-2;P06731	Carcinoembryonic antigen-related cell adhesion molecule 8	CEACAM8		+	+	21.4077	22.9247	21.3598												Nervous system disease	Central Nervous system neoplasm	epilepsy	Astrocytoma	Medulloblastoma							CD66b;CD66e			plasma membrane							0.446661	0.071912	1492	0.78125	0.0615914	0.578125	0.940111	0.78125	0.0955809
P32004-3;P32004-2;P32004	Neural cell adhesion molecule L1	L1CAM	+		+	27.231	23.2331	21.8288	+	+	+			+						Nervous system disease	Central Nervous system neoplasm	epilepsy	Astrocytoma								CD106			plasma membrane							4.44923	1.0096	490	0.953125	0.000631798	1	4.01349e-05	0.71875	0.0881538
P32119;P32119-2	Peroxiredoxin-2	PRDX2	+	+	+	30.4763	31.083	29.8751												Nervous system disease	Central Nervous system neoplasm	epilepsy	Astrocytoma	Medulloblastoma															cytoplasm		1.90011	0.41833	1007	0.640625	0.502835	0.570312	0.474609	0.71875	0.109683
P32856-3;P32856-2;P32856	Syntaxin-2	STX2		+	+	21.2522	22.5468	22.712												Nervous system disease					Synapse	Synaptosome								plasma membrane							1.0523	0.2071	1271	0.734375	0.0823209	0.734375	0.0925365	0.53125	0.832929
P32942	Intercellular adhesion molecule 3	ICAM3		+	+	22.3368	22.899	21.843												Nervous system disease	Central Nervous system neoplasm		Astrocytoma								CD50			plasma membrane							0.238924	0.030838	1565	0.625	0.349343	0.5625	0.484448	0.71875	0.159622
P33176;Q12840	Kinesin-1 heavy chain	KIF5B		+	+	21.7749	22.5267	21.9376												Nervous system disease	Central Nervous system neoplasm	epilepsy	Astrocytoma	Medulloblastoma	Synapse												mitochondrion	Organelli	cytoplasm		0.223964	0.028979	1569	0.734375	0.326415	0.53125	0.788426	0.671875	0.444579
P33908;P33908-2	Mannosyl-oligosaccharide 1,2-alpha-mannosidase IA	MAN1A1	+	+	+	25.3558	22.0362	23.7299	+	+				+							Central Nervous system neoplasm		Astrocytoma												Golgi	endoplasmic reticulum		Organelli	cytoplasm		3.06777	0.70757	743	0.984375	1.40034e-05	0.765625	0.0664646	0.765625	0.072837
P34096	Ribonuclease 4	RNASE4	+	+	+	24.275	24.3119	27.0041	+			+		+						Nervous system disease																					1.65316	0.34215	1094	0.546875	0.971502	1	0.00169867	0.875	0.00413045
P34932;P34932-2	Heat shock 70 kDa protein 4	HSPA4	+		+	22.3634	22.6785	22.6953												Nervous system disease		epilepsy															mitochondrion	Organelli		nucleus	0.0435214	0.0036679	1613	0.609375	0.741346	0.5625	0.749252	0.578125	0.983547
P35052;P35052-2	Glypican-1;Secreted glypican-1	GPC1	+	+	+	25.3037	23.5918	24.1276												Nervous system disease	Central Nervous system neoplasm		Astrocytoma											plasma membrane	Golgi			Organelli			1.45959	0.28761	1158	0.734375	0.0637629	0.507812	0.305915	0.609375	0.6544
P35080-2	Profilin-2	PFN2		+	+	21.6204	23.0552	22.7053	+	+				+						Nervous system disease	Central Nervous system neoplasm		Astrocytoma																cytoplasm		0.844994	0.15623	1344	0.84375	0.0140313	0.796875	0.0391291	0.578125	0.532281
P35222	Catenin beta-1	CTNNB1		+	+	21.344	27.0105	23.8272	+	+				+						Nervous system disease	Central Nervous system neoplasm	epilepsy	Astrocytoma	Medulloblastoma	Synapse									plasma membrane					cytoplasm	nucleus	3.69686	0.86554	608	1	7.98485e-05	0.84375	0.0588653	0.84375	0.0473628
P35237	Serpin B6	SERPINB6	+		+	25.5848	22.7798	21.2988	+	+	+			+						Nervous system disease	Central Nervous system neoplasm		Astrocytoma									I04.011		plasma membrane					cytoplasm		4.98052	1.1206	413	0.953125	0.000605487	1	8.6666e-11	0.75	0.0370091
P35241;P35241-5;P35241-4;P35241-2;P35241-3	Radixin	RDX	+	+	+	21.0051	25.4297	23.684	+	+	+	+	+	+	+					Nervous system disease	Central Nervous system neoplasm	epilepsy	Astrocytoma											plasma membrane							10.0114	2.1513	64	0.921875	0.000171766	0.890625	0.00647074	0.84375	0.0105184
P35442	Thrombospondin-2	THBS2	+	+	+	24.3347	23.1146	24.7153												Nervous system disease	Central Nervous system neoplasm	epilepsy	Astrocytoma	Medulloblastoma																	0.601104	0.096372	1439	0.671875	0.330175	0.5625	0.774469	0.609375	0.29773
P35443	Thrombospondin-4	THBS4	+	+	+	25.0617	21.152	23.2526	+	+				+						Nervous system disease	Central Nervous system neoplasm		Astrocytoma													endoplasmic reticulum		Organelli			3.15892	0.72914	727	1	1.26647e-06	0.710938	0.04756	0.78125	0.0390299
P35542	Serum amyloid A-4 protein	SAA4	+	+	+	28.0643	28.382	28.801												Nervous system disease	Central Nervous system neoplasm																				0.106067	0.012523	1600	0.53125	0.649009	0.804688	0.0482591	0.609375	0.537399
P35555	Fibrillin-1	FBN1	+	+	+	23.2071	21.4386	25.3792												Nervous system disease		epilepsy														endoplasmic reticulum		Organelli			2.2704	0.53095	904	0.671875	0.157178	0.671875	0.189736	0.828125	0.0188602
P35579;P35579-2	Myosin-9	MYH9	+	+	+	26.7832	29.9823	28.1764	+	+		+		+						Nervous system disease	Central Nervous system neoplasm		Astrocytoma	Medulloblastoma										plasma membrane					cytoplasm	nucleus	7.12922	1.5992	189	0.953125	0.00652436	0.671875	0.179964	0.953125	0.00072205
P35580-2;P35580-4;P35580;P35580-5;P35580-3	Myosin-10	MYH10		+	+	21.4859	22.3279	22.3791												Nervous system disease	Central Nervous system neoplasm	epilepsy			Synapse														cytoplasm	nucleus	0.945571	0.1846	1310	0.6875	0.153981	0.671875	0.169344	0.53125	0.941035
P35590;P35590-3;P35590-2	Tyrosine-protein kinase receptor Tie-1	TIE1	+			23.5122	20.8363	21.1838	+	+	+			+						Nervous system disease													TIE1	plasma membrane							2.88797	0.66631	778	0.953125	0.000554246	0.90625	0.00303459	0.625	0.440951
P35606-2;P35606	Coatomer subunit beta	COPB2			+	20.9	21.3945	21.3024												Nervous system disease	Central Nervous system neoplasm		Astrocytoma												Golgi	endoplasmic reticulum		Organelli			2.1457	0.49039	937	0.75	0.183799	0.625	0.292135	0.515625	0.833444
P35611-2;P35611-6;P35611;P35611-3;P35611-4;P35611-5	Alpha-adducin	ADD1	+	+	+	21.598	26.1759	23.0945	+	+				+						Nervous system disease	Central Nervous system neoplasm		Astrocytoma		Synapse									plasma membrane					cytoplasm	nucleus	3.72406	0.86977	604	0.953125	0.000780564	0.71875	0.122919	0.828125	0.0154454
P35612;P35612-4;P35612-3;P35612-2;P35612-8;P35612-9;P35612-5;P35612-6;P35612-7	Beta-adducin	ADD2	+	+	+	22.0097	25.4065	23.135	+	+				+						Nervous system disease	Central Nervous system neoplasm		Astrocytoma		Synapse									plasma membrane					cytoplasm		1.58312	0.32233	1122	0.859375	0.0103843	0.59375	0.246233	0.71875	0.118933
P35613;P35613-2;P35613-4	Basigin	BSG		+	+	21.502	30.4322	28.0804	+	+	+	+	+	+	+	+				Nervous system disease	Central Nervous system neoplasm	epilepsy	Astrocytoma	Medulloblastoma							CD147			plasma membrane	Golgi	endoplasmic reticulum	mitochondrion	Organelli			16.9208	3.1694	2	1	2.54481e-10	1	2.1291e-09	1	2.00601e-05
P35613-3	Basigin	BSG			+	21.469	23.3594	21.8335	+	+				+						Nervous system disease	Central Nervous system neoplasm		Astrocytoma	Medulloblastoma							CD147			plasma membrane	Golgi	endoplasmic reticulum	mitochondrion	Organelli			2.13146	0.48668	941	0.8125	0.0280574	0.578125	0.605972	0.734375	0.0834107
P35754	Glutaredoxin-1	GLRX	+	+	+	24.9451	24.4704	22.2851												Nervous system disease	Central Nervous system neoplasm	epilepsy	Astrocytoma														mitochondrion	Organelli		nucleus	0.704151	0.12146	1397	0.578125	0.720666	0.8125	0.0261918	0.734375	0.0850811
P35813-3;P35813;P35813-2	Protein phosphatase 1A	PPM1A			+	21.4966	22.3353	21.5883												Nervous system disease														plasma membrane						nucleus	3.00639	0.6857	762	0.796875	0.0784823	0.515625	0.884776	0.71875	0.209607
P35858;P35858-2	Insulin-like growth factor-binding protein complex acid labile subunit	IGFALS	+	+	+	26.9297	22.2981	22.3215	+	+	+			+						Nervous system disease		epilepsy																			3.1979	0.73602	717	0.96875	2.22009e-05	0.96875	0.000107153	0.53125	0.97897
P36021	Monocarboxylate transporter 8	SLC16A2		+	+	20.8697	21.9199	22.8666	+	+	+			+						Nervous system disease		epilepsy												plasma membrane							1.07196	0.21285	1263	0.90625	0.00231422	0.9375	0.000136591	0.875	0.0140546
P36222	Chitinase-3-like protein 1	CHI3L1	+	+	+	31.383	24.1039	30.3011	+	+		+		+						Nervous system disease	Central Nervous system neoplasm	epilepsy	Astrocytoma	Medulloblastoma												endoplasmic reticulum		Organelli	cytoplasm		5.96767	1.3133	300	1	1.15744e-05	0.625	0.184207	0.984375	0.000130413
P36405	ADP-ribosylation factor-like protein 3	ARL3		+	+	21.5843	26.6796	25.5612	+	+	+			+						Nervous system disease	Central Nervous system neoplasm														Golgi			Organelli	cytoplasm	nucleus	3.37299	0.78159	676	1	2.77771e-06	0.78125	0.00676328	0.5	0.423886
P36543;P36543-2;P36543-3;Q96A05	V-type proton ATPase subunit E 1	ATP6V1E1			+	21.4474	22.5861	21.486	+	+				+						Nervous system disease	Central Nervous system neoplasm		Astrocytoma		Synapse									plasma membrane							1.20738	0.23537	1231	0.875	0.00896126	0.515625	0.939939	0.875	0.0215486
P36578	60S ribosomal protein L4	RPL4			+	20.8252	21.9089	21.8571														epilepsy														endoplasmic reticulum		Organelli	cytoplasm	nucleus	0.925082	0.17721	1317	0.8125	0.0758345	0.671875	0.135832	0.546875	0.947338
P36871;P36871-2;P36871-3	Phosphoglucomutase-1	PGM1	+	+	+	21.6634	23.1904	21.6734												Nervous system disease	Central Nervous system neoplasm		Astrocytoma																cytoplasm		2.06332	0.46683	957	0.75	0.0807764	0.53125	0.988753	0.78125	0.0506846
P36955	Pigment epithelium-derived factor	SERPINF1	+	+	+	33.8085	29.5465	32.8524	+	+		+		+						Nervous system disease	Central Nervous system neoplasm	epilepsy	Astrocytoma	Medulloblastoma								I04.979							cytoplasm		3.59004	0.8405	633	0.984375	0.000197536	0.742188	0.267876	0.828125	0.0125532
P36959	GMP reductase 1	GMPR	+	+	+	22.6895	22.3838	23.3309												Nervous system disease																					0.207848	0.027658	1573	0.640625	0.763431	0.625	0.400277	0.65625	0.414486
P36969-2;P36969	Phospholipid hydroperoxide glutathione peroxidase, mitochondrial	GPX4		+	+	21.4638	23.2903	22.8793	+	+				+						Nervous system disease	Central Nervous system neoplasm		Astrocytoma														mitochondrion	Organelli		nucleus	0.881244	0.16336	1338	0.890625	0.00226055	0.828125	0.0516865	0.53125	0.511744
P37235;P84074	Hippocalcin-like protein 1	HPCAL1			+	20.4499	21.9474	21.6855	+	+				+						Nervous system disease	Central Nervous system neoplasm	epilepsy	Astrocytoma		Synapse														cytoplasm		0.832347	0.15065	1350	0.859375	0.0119029	0.796875	0.0263377	0.578125	0.642669
P37802;P37802-2	Transgelin-2	TAGLN2	+	+	+	25.362	24.896	22.2642	+			+		+						Nervous system disease	Central Nervous system neoplasm		Astrocytoma																		1.43593	0.28506	1165	0.664062	0.564039	0.90625	0.00216766	0.953125	0.000544497
P37837	Transaldolase	TALDO1	+	+	+	25.726	24.5884	25.5463												Nervous system disease	Central Nervous system neoplasm			Medulloblastoma															cytoplasm	nucleus	1.00194	0.19745	1287	0.6875	0.192773	0.546875	0.825085	0.671875	0.322984
P37840-2;P37840;P37840-3	Alpha-synuclein	SNCA	+		+	23.5962	24.1862	21.4216	+			+		+						Nervous system disease	Central Nervous system neoplasm	epilepsy	Astrocytoma	Medulloblastoma	Synapse	Synaptosome								plasma membrane			mitochondrion	Organelli	cytoplasm	nucleus	1.74752	0.36739	1062	0.625	0.500374	0.78125	0.0218514	0.9375	0.000492338
P38571-2;P38571	Lysosomal acid lipase/cholesteryl ester hydrolase	LIPA		+	+	21.0371	24.7147	26.2882	+	+	+			+						Nervous system disease	Central Nervous system neoplasm		Astrocytoma									S33.017									5.62492	1.2739	326	1	1.34586e-05	1	1.24256e-05	0.765625	0.101037
P38606-2;P38606	V-type proton ATPase catalytic subunit A	ATP6V1A	+	+	+	21.4218	24.6034	23.4251	+	+				+						Nervous system disease	Central Nervous system neoplasm	epilepsy	Astrocytoma		Synapse									plasma membrane							2.09413	0.47454	949	0.921875	0.00158336	0.765625	0.0498201	0.671875	0.251292
P39023	60S ribosomal protein L3	RPL3			+	21.1016	23.0935	21.2344	+	+		+		+						Nervous system disease	Central Nervous system neoplasm	epilepsy	Astrocytoma																cytoplasm	nucleus	1.66135	0.34572	1091	0.875	0.00124231	0.53125	0.783425	0.90625	0.00793508
P39059	Collagen alpha-1(XV) chain;Restin;Restin-2;Restin-3;Restin-4	COL15A1	+	+	+	22.4103	21.2887	24.6926												Nervous system disease	Central Nervous system neoplasm		Astrocytoma													endoplasmic reticulum		Organelli			0.962711	0.18681	1305	0.640625	0.260419	0.625	0.20012	0.75	0.05401
P39060-2;P39060-1;P39060	Collagen alpha-1(XVIII) chain;Endostatin	COL18A1	+	+	+	28.9634	25.3642	31.8576	+	+	+	+	+	+	+					Nervous system disease	Central Nervous system neoplasm	epilepsy	Astrocytoma													endoplasmic reticulum		Organelli			11.223	2.5125	33	0.875	0.0012743	1	4.44429e-07	1	5.03568e-06
P39687;O95626;O43423	Acidic leucine-rich nuclear phosphoprotein 32 family member A	ANP32A		+	+	21.5098	23.1183	22.2427												Nervous system disease	Central Nervous system neoplasm		Astrocytoma													endoplasmic reticulum		Organelli	cytoplasm	nucleus	0.893226	0.16931	1332	0.6875	0.27126	0.59375	0.3751	0.601562	0.566592
P40121;P40121-2	Macrophage-capping protein	CAPG	+		+	24.5865	24.0019	21.4353	+			+		+						Nervous system disease	Central Nervous system neoplasm		Astrocytoma								CD46								cytoplasm	nucleus	2.79724	0.64251	801	0.578125	0.553344	0.890625	0.00153595	0.9375	0.00191266
P40189;P40189-3;P40189-2	Interleukin-6 receptor subunit beta	IL6ST	+			24.3853	20.5695	21.9276	+	+	+			+						Nervous system disease	Central Nervous system neoplasm	epilepsy	Astrocytoma	Medulloblastoma							CD130			plasma membrane							4.20426	0.95389	528	0.9375	0.000187663	0.84375	0.0129416	0.8125	0.0532985
P40227;P40227-2;Q92526;Q92526-2;Q92526-3	T-complex protein 1 subunit zeta	CCT6A	+	+	+	21.9106	26.8678	23.2016	+	+		+		+						Nervous system disease	Central Nervous system neoplasm		Astrocytoma																cytoplasm		6.0398	1.3312	287	1	2.75434e-05	0.71875	0.0920438	0.921875	0.000978506
P40925-3;P40925;P40925-2	Malate dehydrogenase, cytoplasmic	MDH1	+	+	+	26.9777	26.4457	25.5453												Nervous system disease	Central Nervous system neoplasm	epilepsy	Astrocytoma																cytoplasm		6.55082	1.4564	239	0.609375	0.316414	0.734375	0.121177	0.65625	0.258892
P40926;P40926-2	Malate dehydrogenase, mitochondrial	MDH2	+	+	+	22.07	24.1818	22.8178												Nervous system disease	Central Nervous system neoplasm	epilepsy															mitochondrion	Organelli	cytoplasm	nucleus	0.622394	0.099946	1434	0.796875	0.0177316	0.546875	0.558301	0.71875	0.229861
P41159	Leptin	LEP	+		+	22.0649	20.9205	20.7527												Nervous system disease	Central Nervous system neoplasm	epilepsy	Astrocytoma																		5.5074	1.2438	342	0.75	0.0832229	0.84375	0.0215574	0.515625	0.763263
P41222	Prostaglandin-H2 D-isomerase	PTGDS	+	+	+	35.1191	29.4882	27.0037	+	+	+	+	+	+	+					Nervous system disease	Central Nervous system neoplasm	epilepsy	Astrocytoma	Medulloblastoma											Golgi	endoplasmic reticulum		Organelli	cytoplasm		10.3493	2.2359	55	1	6.19563e-07	1	2.69532e-10	0.859375	0.00715911
P41732	Tetraspanin-7	TSPAN7		+	+	21.4918	21.8448	21.6901												Nervous system disease	Central Nervous system neoplasm	epilepsy	Astrocytoma								CD231			plasma membrane							0.0277744	0.0032152	1616	0.546875	0.653433	0.5	0.802401	0.53125	0.843138
P42224-2;P42224	Signal transducer and activator of transcription 1-alpha/beta	STAT1		+	+	21.622	22.5943	21.1353												Nervous system disease	Central Nervous system neoplasm	epilepsy	Astrocytoma	Medulloblastoma															cytoplasm	nucleus	0.7146	0.12217	1393	0.734375	0.104016	0.640625	0.536378	0.796875	0.0729663
P42785;P42785-2	Lysosomal Pro-X carboxypeptidase	PRCP	+		+	26.3954	22.8742	21.3094	+	+	+			+						Nervous system disease	Central Nervous system neoplasm		Astrocytoma									S28.001		plasma membrane							3.90592	0.89973	569	0.859375	0.0185699	0.890625	0.000141709	0.65625	0.145759
P42892-3;P42892-2;P42892-4;P42892	Endothelin-converting enzyme 1	ECE1		+		21.2997	20.5498	23.4228	+			+		+						Nervous system disease	Central Nervous system neoplasm		Astrocytoma									M13.002		plasma membrane					cytoplasm		1.97445	0.44152	979	0.703125	0.146652	0.859375	0.014322	0.96875	0.000459564
P43003-2;P43003;P48664-2;P48664	Excitatory amino acid transporter 1	SLC1A3		+	+	21.5893	26.843	26.2039	+	+	+			+						Nervous system disease	Central Nervous system neoplasm	epilepsy	Astrocytoma	Medulloblastoma	Synapse	Synaptosome				Glutamatergic synapse				plasma membrane	Golgi			Organelli	cytoplasm		6.37957	1.4132	257	1	2.29218e-06	0.984375	8.33501e-06	0.71875	0.193172
P43004-3;P43004-2;P43004	Excitatory amino acid transporter 2	SLC1A2		+	+	21.9839	25.7805	24.5037	+	+	+			+						Nervous system disease	Central Nervous system neoplasm	epilepsy	Astrocytoma	Medulloblastoma	Synapse	Synaptosome				Glutamatergic synapse				plasma membrane							4.25193	0.97065	520	0.890625	0.000898265	0.9375	0.00571737	0.671875	0.245287
P43007;P43007-2	Neutral amino acid transporter A	SLC1A4			+	21.1597	22.9512	21.017	+	+		+		+						Nervous system disease	Central Nervous system neoplasm	epilepsy	Astrocytoma		Synapse									plasma membrane							1.54759	0.3112	1132	0.84375	0.0141071	0.578125	0.843374	0.84375	0.00965393
P43121;P43121-2	Cell surface glycoprotein MUC18	MCAM	+			25.7283	20.6587	21.6972	+	+	+			+						Nervous system disease	Central Nervous system neoplasm		Astrocytoma								CD146			plasma membrane						nucleus	5.98055	1.3177	297	1	6.56149e-07	0.9375	0.00032664	0.75	0.13293
P43251-4;P43251;P43251-3;P43251-2	Biotinidase	BTD	+		+	28.8749	21.8804	21.3056	+	+	+			+						Nervous system disease		epilepsy																			8.32713	1.808	119	1	2.29843e-09	1	2.09698e-09	0.65625	0.427983
P43307;P43307-2	Translocon-associated protein subunit alpha	SSR1			+	21.7488	21.2508	21.178												Nervous system disease	Central Nervous system neoplasm			Medulloblastoma												endoplasmic reticulum		Organelli			0.126337	0.013482	1597	0.640625	0.366348	0.640625	0.357111	0.539062	0.894694
P43487-2;P43487;Q9C010;Q9C010-2	Ran-specific GTPase-activating protein	RANBP1	+		+	22.2263	23.1679	21.2416												Nervous system disease	Central Nervous system neoplasm		Astrocytoma																cytoplasm	nucleus	1.0534	0.20765	1270	0.6875	0.29778	0.671875	0.183597	0.8125	0.0219474
P43490	Nicotinamide phosphoribosyltransferase	NAMPT		+	+	21.3257	24.1052	24.8951												Nervous system disease	Central Nervous system neoplasm	epilepsy	Astrocytoma																		1.69144	0.35581	1082	0.796875	0.0191546	0.90625	0.00104156	0.625	0.512575
P43652;CON__REFSEQ:XP_585019	Afamin	AFM	+	+	+	30.1197	23.5597	22.9001	+	+	+			+						Nervous system disease	Central Nervous system neoplasm		Astrocytoma	Medulloblastoma															cytoplasm		4.71271	1.0711	449	0.984375	1.63135e-05	1	1.05136e-06	0.59375	0.564881
P43686;P43686-2	26S protease regulatory subunit 6B	PSMC4		+	+	20.9734	23.6886	22.5449	+	+				+						Nervous system disease	Central Nervous system neoplasm		Astrocytoma																	nucleus	1.87287	0.40821	1016	0.953125	0.0013559	0.734375	0.0754848	0.71875	0.273741
P45877	Peptidyl-prolyl cis-trans isomerase C	PPIC	+			24.5596	20.5817	21.7733	+	+	+			+						Nervous system disease	Central Nervous system neoplasm		Astrocytoma																cytoplasm		5.59122	1.2588	333	1	5.21247e-07	1	0.000130389	0.765625	0.0265172
P45880-2;P45880;P45880-1	Voltage-dependent anion-selective channel protein 2	VDAC2		+	+	22.3188	23.1736	21.6236												Nervous system disease	Central Nervous system neoplasm		Astrocytoma		Synapse												mitochondrion	Organelli		nucleus	0.565586	0.090971	1450	0.515625	0.35639	0.625	0.44168	0.671875	0.214208
P45974-2;P45974;Q92995-2;Q92995	Ubiquitin carboxyl-terminal hydrolase 5	USP5	+	+	+	21.4191	25.0159	22.1292	+	+				+						Nervous system disease	Central Nervous system neoplasm	epilepsy	Astrocytoma									C19.001;C19.012								nucleus	1.81476	0.38762	1038	0.84375	0.0104794	0.625	0.527051	0.78125	0.0632881
P46060	Ran GTPase-activating protein 1	RANGAP1		+	+	21.4169	21.8899	22.0645												Nervous system disease	Central Nervous system neoplasm		Astrocytoma	Medulloblastoma															cytoplasm	nucleus	0.438094	0.071153	1495	0.59375	0.258466	0.726562	0.158548	0.59375	0.755917
P46108-2;P46108	Adapter molecule crk	CRK			+	21.6121	22.2267	21.849												Nervous system disease	Central Nervous system neoplasm	epilepsy	Astrocytoma											plasma membrane					cytoplasm	nucleus	0.264217	0.039299	1554	0.65625	0.255394	0.625	0.613913	0.625	0.474417
P46109	Crk-like protein	CRKL	+		+	22.1506	23.4458	21.0377	+			+		+						Nervous system disease	Central Nervous system neoplasm	epilepsy	Astrocytoma		Synapse																2.06983	0.46761	955	0.734375	0.121235	0.796875	0.0548077	0.84375	0.00855126
P46459;P46459-2	Vesicle-fusing ATPase	NSF		+	+	20.9554	24.5314	22.8449	+	+				+						Nervous system disease	Central Nervous system neoplasm		Astrocytoma	Medulloblastoma	Synapse	Synaptosome	GABAergic synapse							plasma membrane	Golgi			Organelli			3.4946	0.80582	653	0.96875	0.000384104	0.8125	0.0331423	0.71875	0.0881733
P46781	40S ribosomal protein S9	RPS9		+	+	21.7568	22.4201	21.8342												Nervous system disease	Central Nervous system neoplasm	epilepsy	Astrocytoma																cytoplasm	nucleus	0.272536	0.044947	1548	0.703125	0.300064	0.546875	0.898742	0.578125	0.432925
P46821	Microtubule-associated protein 1B;MAP1B heavy chain;MAP1 light chain LC1	MAP1B	+	+	+	22.7303	25.388	22.5595												Nervous system disease	Central Nervous system neoplasm	epilepsy	Astrocytoma		Synapse									plasma membrane					cytoplasm		0.782458	0.13322	1375	0.75	0.0788022	0.53125	0.895261	0.828125	0.0353066
P46940	Ras GTPase-activating-like protein IQGAP1	IQGAP1	+	+	+	22.1803	28.2537	24.8948	+	+	+	+	+	+	+					Nervous system disease	Central Nervous system neoplasm		Astrocytoma											plasma membrane					cytoplasm	nucleus	9.79369	2.1067	71	1	1.89038e-06	0.875	0.00966823	0.859375	0.00291457
P46976;P46976-2;P46976-3	Glycogenin-1	GYG1		+	+	21.2675	22.5106	23.1161	+	+				+						Nervous system disease	Central Nervous system neoplasm		Astrocytoma																cytoplasm		0.685563	0.11656	1406	0.859375	0.0108556	0.679688	0.0547802	0.640625	0.51783
P47755;P47755-2	F-actin-capping protein subunit alpha-2	CAPZA2	+	+	+	23.0476	26.0122	25.7181	+	+	+			+																											3.21887	0.74087	713	0.90625	0.001403	0.9375	0.00182503	0.546875	0.674684
P47756-2;P47756	F-actin-capping protein subunit beta	CAPZB	+	+	+	22.2071	24.3153	22.8526												Nervous system disease	Central Nervous system neoplasm		Astrocytoma		Synapse																0.608207	0.097846	1436	0.75	0.0540572	0.59375	0.60329	0.609375	0.0820511
P47972	Neuronal pentraxin-2	NPTX2	+			26.0816	21.0977	21.6621	+	+	+			+						Nervous system disease	Central Nervous system neoplasm	epilepsy	Astrocytoma		Synapse																5.8169	1.2874	314	1	1.58354e-10	1	7.16e-07	0.640625	0.258564
P48061-2;P48061-5;P48061;P48061-6;P48061-3;P48061-4	Stromal cell-derived factor 1;SDF-1-beta(3-72);SDF-1-alpha(3-67)	CXCL12		+	+	21.1706	23.4605	24.1424	+	+	+			+						Nervous system disease	Central Nervous system neoplasm	epilepsy	Astrocytoma	Medulloblastoma										plasma membrane					cytoplasm	nucleus	1.82769	0.39203	1033	0.921875	0.00963141	0.921875	0.000231039	0.59375	0.45513
P48147	Prolyl endopeptidase	PREP			+	21.3834	22.3779	22.0401												Nervous system disease	Central Nervous system neoplasm											S09.001							cytoplasm	nucleus	0.663048	0.10624	1419	0.765625	0.0491377	0.71875	0.181478	0.625	0.425447
P48426;P48426-2	Phosphatidylinositol 5-phosphate 4-kinase type-2 alpha	PIP4K2A		+	+	21.6511	25.3456	22.0394	+	+		+		+						Nervous system disease	Central Nervous system neoplasm		Astrocytoma											plasma membrane							2.6809	0.6263	819	0.953125	0.00183328	0.507812	0.591984	0.890625	0.00675443
P48506	Glutamate--cysteine ligase catalytic subunit	GCLC	+	+	+	22.264	24.1311	23.162												Nervous system disease	Central Nervous system neoplasm		Astrocytoma														mitochondrion	Organelli			0.185936	0.02391	1583	0.671875	0.250216	0.5625	0.577	0.578125	0.611213
P48507;P48507-2	Glutamate--cysteine ligase regulatory subunit	GCLM	+		+	21.7974	23.5664	22.0599												Nervous system disease	Central Nervous system neoplasm																				0.396357	0.06369	1509	0.703125	0.155977	0.5	0.821864	0.671875	0.298427
P48509	CD151 antigen	CD151			+	22.0619	23.6568	20.95	+			+		+						Nervous system disease	Central Nervous system neoplasm	epilepsy	Astrocytoma								CD151			plasma membrane							1.18217	0.23137	1237	0.703125	0.0680815	0.8125	0.0567564	0.875	0.0073054
P48556	26S proteasome non-ATPase regulatory subunit 8	PSMD8			+	21.3216	22.6498	21.0981												Nervous system disease	Central Nervous system neoplasm		Astrocytoma																	nucleus	1.62192	0.3316	1108	0.765625	0.0814622	0.578125	0.743092	0.765625	0.0778873
P48643;P48643-2	T-complex protein 1 subunit epsilon	CCT5		+	+	21.4933	24.4836	23.1813	+	+	+			+						Nervous system disease	Central Nervous system neoplasm		Astrocytoma																		4.02546	0.93192	548	0.921875	0.00262299	0.890625	0.00433483	0.78125	0.124552
P48735;P48735-2	Isocitrate dehydrogenase [NADP], mitochondrial	IDH2	+	+	+	21.4091	24.0576	24.2949	+	+	+			+						Nervous system disease	Central Nervous system neoplasm	epilepsy	Astrocytoma														mitochondrion	Organelli			3.92421	0.90558	564	0.90625	0.00130818	0.90625	0.00429336	0.515625	0.796015
P48740	Mannan-binding lectin serine protease 1;Mannan-binding lectin serine protease 1 heavy chain;Mannan-binding lectin serine protease 1 light chain	MASP1		+		21.5114	20.8673	24.2899	+			+		+						Nervous system disease	Central Nervous system neoplasm		Astrocytoma									S01.132		plasma membrane							2.6172	0.61121	828	0.65625	0.251417	0.90625	0.00432174	0.96875	0.000481856
P48740-2	Mannan-binding lectin serine protease 1;Mannan-binding lectin serine protease 1 heavy chain;Mannan-binding lectin serine protease 1 light chain	MASP1	+	+		26.6831	20.8844	27.9562	+	+				+						Nervous system disease	Central Nervous system neoplasm		Astrocytoma									S01.132		plasma membrane							8.07095	1.75	136	1	1.46483e-10	0.78125	0.0822502	1	4.1111e-08
P48960-2;P48960-3;P48960	CD97 antigen;CD97 antigen subunit alpha;CD97 antigen subunit beta	CD97		+	+	21.6451	27.0575	22.4324	+	+				+						Nervous system disease	Central Nervous system neoplasm		Astrocytoma								CD97	P02.002		plasma membrane							4.73902	1.0733	445	1	1.34265e-06	0.53125	0.418475	0.9375	0.00065702
P49006	MARCKS-related protein	MARCKSL1	+	+	+	22.0473	21.6173	21.9307												Nervous system disease	Central Nervous system neoplasm		Astrocytoma											plasma membrane					cytoplasm		0.0235644	0.0027925	1617	0.609375	0.51152	0.53125	0.876247	0.640625	0.653071
P49247	Ribose-5-phosphate isomerase	RPIA	+		+	21.2298	22.8334	22.67												Nervous system disease	Central Nervous system neoplasm																				0.632435	0.10211	1428	0.890625	0.102535	0.828125	0.166176	0.59375	0.861963
P49257	Protein ERGIC-53	LMAN1	+		+	22.6627	22.5843	20.9451	+			+		+						Nervous system disease															Golgi	endoplasmic reticulum		Organelli			2.01726	0.45001	972	0.546875	0.918544	0.734375	0.055462	0.90625	0.00292954
P49327	Fatty acid synthase;[Acyl-carrier-protein] S-acetyltransferase;[Acyl-carrier-protein] S-malonyltransferase;3-oxoacyl-[acyl-carrier-protein] synthase;3-oxoacyl-[acyl-carrier-protein] reductase;3-hydroxyacyl-[acyl-carrier-protein] dehydratase;Enoyl-[acyl-carrier-protein] reductase;Oleoyl-[acyl-carrier-protein] hydrolase	FASN		+	+	21.4903	23.5177	21.5279	+	+				+						Nervous system disease	Central Nervous system neoplasm	epilepsy	Astrocytoma	Medulloblastoma							CD95			plasma membrane	Golgi			Organelli	cytoplasm		1.93473	0.42613	993	1	0.000438624	0.695312	0.96353	0.875	0.0380603
P49368;P49368-2	T-complex protein 1 subunit gamma	CCT3			+	22.4653	24.6205	21.5625	+			+		+						Nervous system disease	Central Nervous system neoplasm		Astrocytoma																		2.07403	0.47001	953	0.796875	0.0240573	0.867188	0.0568839	0.9375	0.00241108
P49411	Elongation factor Tu, mitochondrial	TUFM		+	+	21.8444	22.439	28.0827												Nervous system disease	Central Nervous system neoplasm		Astrocytoma														mitochondrion	Organelli			6.21036	1.3665	271	0.53125	0.515971	1	1.28454e-08	1	1.08665e-05
P49419;P49419-2;P49419-4	Alpha-aminoadipic semialdehyde dehydrogenase	ALDH7A1		+	+	21.4706	22.0687	22.1893												Nervous system disease	Central Nervous system neoplasm	epilepsy	Astrocytoma														mitochondrion	Organelli		nucleus	0.104117	0.01233	1602	0.59375	0.352438	0.640625	0.266089	0.53125	0.868525
P49588;P49588-2	Alanine--tRNA ligase, cytoplasmic	AARS		+	+	21.5949	22.5266	23.3775												Nervous system disease		epilepsy															mitochondrion	Organelli	cytoplasm		0.891745	0.16853	1334	0.640625	0.21092	0.84375	0.0151935	0.6875	0.295473
P49591	Serine--tRNA ligase, cytoplasmic	SARS			+	20.9561	22.9025	21.6465	+	+		+		+						Nervous system disease	Central Nervous system neoplasm		Astrocytoma																cytoplasm	nucleus	1.27729	0.25426	1205	0.859375	0.009587	0.640625	0.303178	0.90625	0.0108807
P49641;P49641-1;P49641-2	Alpha-mannosidase 2x	MAN2A2	+			25.5864	20.6953	21.0836	+	+	+			+						Nervous system disease	Central Nervous system neoplasm														Golgi			Organelli			5.48011	1.2275	351	1	1.15486e-07	1	3.17659e-07	0.671875	0.311853
P49721	Proteasome subunit beta type-2	PSMB2	+	+	+	22.627	23.5852	23.8889												Nervous system disease	Central Nervous system neoplasm		Astrocytoma									T01.984							cytoplasm	nucleus	0.45087	0.073111	1490	0.671875	0.33959	0.703125	0.220128	0.546875	0.743564
P49747;P49747-2;CON__ENSEMBL:ENSBTAP00000006074	Cartilage oligomeric matrix protein	COMP	+	+		24.4892	20.9766	22.4906	+	+				+						Nervous system disease		epilepsy																			4.28769	0.97398	517	0.9375	0.000282387	0.765625	0.0908346	0.609375	0.107698
P49773	Histidine triad nucleotide-binding protein 1	HINT1	+	+	+	21.9001	27.3351	25.4928	+	+	+			+						Nervous system disease	Central Nervous system neoplasm	epilepsy	Astrocytoma											plasma membrane					cytoplasm	nucleus	3.8121	0.88334	588	0.96875	0.000182618	0.90625	0.00346892	0.75	0.0986519
P49788;P49788-2	Retinoic acid receptor responder protein 1	RARRES1				21.6305	20.3076	20.7624													Central Nervous system neoplasm		Astrocytoma									I47.002									5.15975	1.1683	384	0.796875	0.0452961	0.5625	0.194402	0.765625	0.248227
P49908	Selenoprotein P	SEPP1	+	+	+	27.161	22.9601	24.078	+	+	+			+						Nervous system disease		epilepsy									CD62P										2.26162	0.52813	906	1	0.000256321	0.765625	0.00730438	0.59375	0.396913
P49913	Cathelicidin antimicrobial peptide;Antibacterial protein FALL-39;Antibacterial protein LL-37	CAMP		+	+	21.6249	21.9696	22.049												Nervous system disease		epilepsy																			1.49077	0.29542	1151	0.5625	0.604901	0.601562	0.538818	0.515625	0.927046
P49961-5;P49961;P49961-2;P49961-6;P49961-3;P49961-4	Ectonucleoside triphosphate diphosphohydrolase 1	ENTPD1			+	21.0613	24.245	21.7826	+	+		+		+						Nervous system disease	Central Nervous system neoplasm	epilepsy	Astrocytoma								CD39			plasma membrane							3.036	0.69599	752	1	6.84009e-05	0.625	0.280072	0.90625	0.00149235
P50148	Guanine nucleotide-binding protein G(q) subunit alpha	GNAQ			+	21.5032	23.9353	21.5677	+	+				+						Nervous system disease	Central Nervous system neoplasm	epilepsy	Astrocytoma		Synapse	Synaptosome		Cholinergic synapse	Serotonergic synapse	Glutamatergic synapse				plasma membrane	Golgi			Organelli	cytoplasm		2.57575	0.60318	838	0.96875	0.00225097	0.53125	0.915532	0.859375	0.00883442
P50238	Cysteine-rich protein 1	CRIP1			+	21.7898	22.2153	21.0985												Nervous system disease																			cytoplasm		0.416367	0.065995	1505	0.671875	0.422218	0.640625	0.342825	0.703125	0.156991
P50281	Matrix metalloproteinase-14	MMP14			+	21.8468	23.6672	21.2889	+	+		+		+						Nervous system disease	Central Nervous system neoplasm	epilepsy	Astrocytoma	Medulloblastoma								M10.014		plasma membrane	Golgi			Organelli	cytoplasm	nucleus	1.3581	0.26898	1185	0.859375	0.0116875	0.640625	0.384014	0.84375	0.00520666
P50395;P50395-2	Rab GDP dissociation inhibitor beta	GDI2	+	+	+	28.0854	28.6206	26.4856												Nervous system disease	Central Nervous system neoplasm	epilepsy		Medulloblastoma											Golgi			Organelli	cytoplasm		2.41113	0.56396	874	0.609375	0.473515	0.78125	0.0645691	0.8125	0.0269043
P50502;Q8NFI4;Q8IZP2	Hsc70-interacting protein;Putative protein FAM10A5;Putative protein FAM10A4	ST13;ST13P5;ST13P4	+	+	+	23.1481	26.0423	25.5618	+	+				+						Nervous system disease	Central Nervous system neoplasm		Astrocytoma	Medulloblastoma															cytoplasm		1.42821	0.28424	1167	0.84375	0.0230169	0.8125	0.0369274	0.546875	0.58183
P50552	Vasodilator-stimulated phosphoprotein	VASP		+	+	21.9085	22.764	23.4458												Nervous system disease	Central Nervous system neoplasm		Astrocytoma											plasma membrane							0.461273	0.073369	1488	0.703125	0.146827	0.703125	0.0754432	0.578125	0.386559
P50897;P50897-2	Palmitoyl-protein thioesterase 1	PPT1	+	+	+	23.5259	22.3224	24.8487	+			+		+						Nervous system disease	Central Nervous system neoplasm	epilepsy	Astrocytoma		Synapse										Golgi			Organelli		nucleus	1.73884	0.36666	1063	0.742188	0.0605839	0.703125	0.115431	0.90625	0.00192113
P50990;P50990-2;P50990-3	T-complex protein 1 subunit theta	CCT8	+	+	+	21.8963	25.0808	23.9372	+	+	+			+						Nervous system disease	Central Nervous system neoplasm	epilepsy	Astrocytoma																cytoplasm		3.18214	0.73352	720	0.9375	0.00107686	0.828125	0.0217532	0.65625	0.213701
P50991;P50991-2	T-complex protein 1 subunit delta	CCT4		+	+	21.254	26.7934	23.7221	+	+	+	+	+	+	+					Nervous system disease	Central Nervous system neoplasm		Astrocytoma																		10.3661	2.2652	54	1	8.21344e-06	0.890625	0.00323249	0.9375	0.00401393
P50993	Sodium/potassium-transporting ATPase subunit alpha-2	ATP1A2		+	+	20.724	24.1172	23.4253	+	+	+			+						Nervous system disease	Central Nervous system neoplasm	epilepsy	Astrocytoma	Medulloblastoma	Synapse									plasma membrane					cytoplasm		4.08166	0.93884	543	0.9375	0.000611405	0.890625	0.00435524	0.578125	0.439266
P50995-2;P50995;P27216;P27216-2	Annexin A11	ANXA11		+	+	21.558	28.4354	28.2558	+	+	+			+						Nervous system disease	Central Nervous system neoplasm													plasma membrane					cytoplasm		9.00684	1.9967	92	1	4.12466e-09	1	8.91741e-10	0.59375	0.654245
P51148;P51148-2	Ras-related protein Rab-5C	RAB5C		+	+	21.5564	26.1002	25.5839	+	+	+			+																				plasma membrane							5.89074	1.3028	307	1	2.64877e-07	1	1.49832e-07	0.703125	0.182961
P51149;Q2WGJ9	Ras-related protein Rab-7a	RAB7A	+	+	+	22.1278	26.1928	25.2367	+	+	+			+						Nervous system disease														plasma membrane	Golgi		mitochondrion	Organelli			7.3014	1.6142	179	1	1.93673e-07	0.921875	0.000278535	0.640625	0.164629
P51665	26S proteasome non-ATPase regulatory subunit 7	PSMD7	+		+	21.6499	23.8233	20.5485	+			+		+																		M67.973								nucleus	1.9139	0.41964	1006	0.84375	0.065634	0.78125	0.0446285	1	0.00640199
P51674-3;P51674-2;P51674	Neuronal membrane glycoprotein M6-a	GPM6A		+	+	21.182	27.9114	28.6077	+	+	+			+				+		Nervous system disease	Central Nervous system neoplasm				Synapse									plasma membrane							7.22162	1.6041	184	1	4.91677e-06	1	6.24215e-11	0.53125	0.464195
P51693	Amyloid-like protein 1;C30	APLP1	+			28.0374	21.2942	21.533	+	+	+			+						Nervous system disease	Central Nervous system neoplasm	epilepsy	Astrocytoma		Synapse									plasma membrane	Golgi			Organelli	cytoplasm		8.5815	1.8991	106	1	7.55763e-11	1	5.27382e-10	0.59375	0.609339
P51693-2	Amyloid-like protein 1;C30	APLP1	+	+	+	32.2205	29.7688	28.7063	+	+	+			+						Nervous system disease	Central Nervous system neoplasm		Astrocytoma											plasma membrane	Golgi			Organelli	cytoplasm		4.73239	1.0714	447	0.96875	0.00342319	1	3.79211e-05	0.65625	0.247988
P51858;P51858-2;P51858-3	Hepatoma-derived growth factor	HDGF		+	+	21.8356	23.3611	22.1579												Nervous system disease	Central Nervous system neoplasm	epilepsy	Astrocytoma																cytoplasm	nucleus	0.700157	0.11984	1399	0.75	0.0692715	0.53125	0.624996	0.75	0.188382
P51884	Lumican	LUM	+	+	+	29.6063	24.1828	24.5795	+	+	+			+						Nervous system disease	Central Nervous system neoplasm		Astrocytoma	Medulloblastoma											Golgi			Organelli			5.09554	1.1589	391	1	5.30445e-06	1	0.00011834	0.554688	0.738654
P51888	Prolargin	PRELP	+	+	+	22.5266	22.1084	25.1351												Nervous system disease	Central Nervous system neoplasm		Astrocytoma												Golgi			Organelli			1.23738	0.24131	1219	0.578125	0.701504	0.75	0.0695437	0.78125	0.0541146
P52209-2;P52209	6-phosphogluconate dehydrogenase, decarboxylating	PGD	+	+	+	27.3305	27.7661	27.7721												Nervous system disease	Central Nervous system neoplasm		Astrocytoma																	nucleus	0.706077	0.1217	1395	0.515625	0.608492	0.609375	0.632784	0.546875	0.995221
P52294	Importin subunit alpha-5;Importin subunit alpha-5, N-terminally processed	KPNA1			+	21.7705	21.6779	22.0875												Nervous system disease					Synapse														cytoplasm	nucleus	0.0405141	0.0035288	1614	0.65625	0.878312	0.578125	0.589342	0.640625	0.512467
P52306-4;P52306;P52306-5;P52306-6;P52306-2;P52306-3	Rap1 GTPase-GDP dissociation stimulator 1	RAP1GDS1		+	+	21.3591	21.7116	23.0499												Nervous system disease	Central Nervous system neoplasm		Astrocytoma													endoplasmic reticulum	mitochondrion	Organelli		nucleus	0.920648	0.17669	1318	0.5	0.443437	0.8125	0.0188902	0.71875	0.0371421
P52565;P52565-2	Rho GDP-dissociation inhibitor 1	ARHGDIA	+	+	+	23.51	24.4599	22.5715	+			+		+						Nervous system disease	Central Nervous system neoplasm		Astrocytoma																	nucleus	0.705153	0.12163	1396	0.59375	0.302202	0.65625	0.350719	0.921875	0.00461257
P52566	Rho GDP-dissociation inhibitor 2	ARHGDIB	+	+	+	23.2337	24.925	22.92													Central Nervous system neoplasm		Astrocytoma																cytoplasm		0.598358	0.095761	1442	0.78125	0.0855538	0.546875	0.800422	0.789062	0.0654637
P52790;Q2TB90-3;Q2TB90-2	Hexokinase-3	HK3		+	+	21.2951	21.4263	23.1109												Nervous system disease	Central Nervous system neoplasm		Astrocytoma														mitochondrion	Organelli	cytoplasm		1.17971	0.23067	1238	0.53125	0.780525	0.765625	0.0354806	0.703125	0.044077
P52799	Ephrin-B2	EFNB2	+			25.0814	20.574	21.8462	+	+	+	+	+	+	+					Nervous system disease	Central Nervous system neoplasm		Astrocytoma	Medulloblastoma	Synapse									plasma membrane							11.2617	2.5145	32	1	8.62736e-07	0.96875	6.04169e-05	0.882812	0.00622577
P52907	F-actin-capping protein subunit alpha-1	CAPZA1	+	+	+	21.8878	25.4975	24.401	+	+	+			+						Nervous system disease																					2.64825	0.61904	824	0.953125	4.80644e-05	0.890625	0.00356978	0.75	0.0511584
P52943;P52943-2	Cysteine-rich protein 2	CRIP2		+	+	21.3769	24.8371	21.5174	+	+		+		+																											3.93985	0.91395	559	0.9375	0.000226703	0.515625	0.833279	0.921875	0.000997564
P53004	Biliverdin reductase A	BLVRA	+	+	+	22.1635	24.793	22.4653												Nervous system disease		epilepsy											BLVRA								0.90198	0.17043	1327	0.71875	0.0509944	0.578125	0.746097	0.71875	0.126939
P53396;P53396-2;P53396-3	ATP-citrate synthase	ACLY	+	+	+	22.3598	25.135	24.4901												Nervous system disease	Central Nervous system neoplasm	epilepsy	Astrocytoma																		1.64684	0.34081	1097	0.734375	0.0516735	0.734375	0.0614844	0.546875	0.686217
P53597	Succinyl-CoA ligase [ADP/GDP-forming] subunit alpha, mitochondrial	SUCLG1				21.4833	21.0578	21.2299												Nervous system disease	Central Nervous system neoplasm		Astrocytoma														mitochondrion	Organelli			6.97205	1.5511	203	0.6875	0.205678	0.546875	0.509602	0.5625	0.665751
P53621;P53621-2	Coatomer subunit alpha;Xenin;Proxenin	COPA			+	21.2324	22.1325	21.0609												Nervous system disease	Central Nervous system neoplasm		Astrocytoma												Golgi	endoplasmic reticulum		Organelli	cytoplasm		0.525285	0.084885	1465	0.6875	0.141822	0.5625	0.73788	0.75	0.0803641
P53634;P53634-2;P53634-3	Dipeptidyl peptidase 1;Dipeptidyl peptidase 1 exclusion domain chain;Dipeptidyl peptidase 1 heavy chain;Dipeptidyl peptidase 1 light chain	CTSC	+	+	+	25.0531	23.4655	24.7511	+	+				+						Nervous system disease	Central Nervous system neoplasm	epilepsy	Astrocytoma									C01.070			Golgi	endoplasmic reticulum		Organelli			1.037	0.20297	1278	0.9375	0.000367911	0.539062	0.618726	0.75	0.0467479
P53985;P53985-2	Monocarboxylate transporter 1	SLC16A1		+	+	21.3736	27.2968	26.445	+	+	+			+						Nervous system disease	Central Nervous system neoplasm	epilepsy	Astrocytoma	Medulloblastoma										plasma membrane							8.32455	1.7959	120	1	1.30032e-08	1	7.00382e-08	0.828125	0.0189178
P53990-2;P53990;P53990-4;P53990-5;P53990-3;P53990-6	IST1 homolog	IST1			+	21.3919	22.7591	21.1011	+	+		+		+						Nervous system disease	Central Nervous system neoplasm		Astrocytoma												Golgi	endoplasmic reticulum		Organelli			1.62698	0.33316	1106	0.8125	0.0233886	0.578125	0.60995	0.875	0.0063442
P54289-2;P54289-5;P54289	Voltage-dependent calcium channel subunit alpha-2/delta-1;Voltage-dependent calcium channel subunit alpha-2-1;Voltage-dependent calcium channel subunit delta-1	CACNA2D1	+		+	28.0656	22.4718	21.6101	+	+	+			+						Nervous system disease	Central Nervous system neoplasm	epilepsy	Astrocytoma											plasma membrane							5.77044	1.2843	316	0.953125	0.000159421	1	3.55856e-06	0.546875	0.369973
P54577	Tyrosine--tRNA ligase, cytoplasmic;Tyrosine--tRNA ligase, cytoplasmic, N-terminally processed	YARS			+	20.5421	23.0172	21.8371	+	+				+						Nervous system disease																			cytoplasm	nucleus	1.79124	0.37881	1048	0.953125	0.00141669	0.734375	0.130959	0.71875	0.256178
P54578-2;P54578;P54578-3	Ubiquitin carboxyl-terminal hydrolase 14	USP14	+	+	+	21.474	25.1533	22.6952	+	+				+						Nervous system disease	Central Nervous system neoplasm	epilepsy										C19.015		plasma membrane					cytoplasm		1.86966	0.40711	1018	0.84375	0.0179897	0.734375	0.142729	0.6875	0.0858285
P54652	Heat shock-related 70 kDa protein 2	HSPA2		+	+	21.0615	24.6804	23.7319	+	+	+			+						Nervous system disease	Central Nervous system neoplasm			Medulloblastoma										plasma membrane					cytoplasm	nucleus	3.18529	0.73387	719	0.984375	1.05852e-05	0.765625	0.0148264	0.5625	0.385439
P54709;P54709-2	Sodium/potassium-transporting ATPase subunit beta-3	ATP1B3		+	+	20.9033	26.8849	24.7318	+	+	+	+	+	+	+					Nervous system disease											CD298			plasma membrane							10.8597	2.4023	39	1	1.21418e-07	1	4.62295e-06	0.875	0.00478869
P54725-3;P54725;P54725-2	UV excision repair protein RAD23 homolog A	RAD23A	+		+	23.7976	21.5125	21.0745	+	+	+			+																					Golgi			Organelli	cytoplasm	nucleus	1.82624	0.39053	1034	0.890625	0.0124533	1	0.00162338	0.609375	0.450983
P54764	Ephrin type-A receptor 4	EPHA4	+			28.1724	20.3649	20.7599	+	+	+			+						Nervous system disease	Central Nervous system neoplasm	epilepsy	Astrocytoma	Medulloblastoma	Synapse								EPHA4	plasma membrane	Golgi	endoplasmic reticulum		Organelli	cytoplasm		8.49086	1.8808	111	1	1.04262e-11	1	5.02234e-10	0.6875	0.334405
P54920	Alpha-soluble NSF attachment protein	NAPA		+	+	21.2171	26.4025	24.6066	+	+	+			+						Nervous system disease		epilepsy			Synapse									plasma membrane							5.20308	1.18	378	1	4.68959e-06	0.859375	0.00262476	0.71875	0.0856522
P55010	Eukaryotic translation initiation factor 5	EIF5			+	21.8725	21.6638	21.5372												Nervous system disease														plasma membrane					cytoplasm		0.104493	0.012398	1601	0.53125	0.691046	0.53125	0.668968	0.515625	0.859618
P55011;P55011-3;Q13621-3;Q13621	Solute carrier family 12 member 2	SLC12A2	+	+	+	21.1591	28.4478	26.7305	+	+	+			+						Nervous system disease	Central Nervous system neoplasm	epilepsy	Astrocytoma		Synapse									plasma membrane					cytoplasm		6.93175	1.539	209	1	8.2662e-09	0.953125	0.000102347	0.6875	0.137572
P55056	Apolipoprotein C-IV	APOC4	+		+	21.8463	21.4298	21.3901												Nervous system disease																					1.39976	0.27783	1174	0.546875	0.635551	0.5625	0.677046	0.53125	0.958517
P55058;P55058-4;P55058-3;P55058-2	Phospholipid transfer protein	PLTP	+	+	+	31.5941	31.0431	30.5284												Nervous system disease	Central Nervous system neoplasm	epilepsy	Astrocytoma																	nucleus	0.967884	0.18759	1303	0.609375	0.356351	0.898438	0.0119479	0.609375	0.436388
P55060-3;P55060;P55060-4;P55060-2	Exportin-2	CSE1L		+	+	21.218	24.573	29.0748	+			+		+						Nervous system disease	Central Nervous system neoplasm		Astrocytoma	Medulloblastoma															cytoplasm	nucleus	5.99597	1.3224	294	0.734375	0.0214681	1	9.91858e-09	0.90625	0.00639654
P55072	Transitional endoplasmic reticulum ATPase	VCP	+	+	+	22.2479	28.3862	26.1815	+	+	+			+						Nervous system disease	Central Nervous system neoplasm	epilepsy	Astrocytoma													endoplasmic reticulum		Organelli	cytoplasm	nucleus	4.34198	0.98624	506	0.859375	0.00161134	0.90625	0.00167528	0.6875	0.146948
P55083;P55083-2	Microfibril-associated glycoprotein 4	MFAP4	+	+	+	26.1061	22.608	27.657	+	+		+		+						Nervous system disease																					4.88545	1.0959	430	0.859375	0.00639276	0.8125	0.0509405	0.96875	0.000382169
P55087;P55087-2	Aquaporin-4	AQP4		+	+	21.2016	25.7676	21.8146	+	+				+						Nervous system disease	Central Nervous system neoplasm	epilepsy	Astrocytoma	Medulloblastoma										plasma membrane					cytoplasm		3.01007	0.6896	760	0.90625	0.00220126	0.546875	0.576741	0.859375	0.0237747
P55160-2;P55160	Nck-associated protein 1-like	NCKAP1L			+	20.0961	22.7122	20.4653	+	+		+		+						Nervous system disease	Central Nervous system neoplasm		Astrocytoma											plasma membrane							4.11031	0.94396	539	1	2.83435e-05	0.671875	0.264975	0.953125	0.000340475
P55209-2;P55209	Nucleosome assembly protein 1-like 1	NAP1L1		+	+	21.6685	25.3145	23.0716	+	+				+						Nervous system disease	Central Nervous system neoplasm		Astrocytoma																cytoplasm	nucleus	4.02146	0.93188	549	0.9375	0.000515287	0.671875	0.121813	0.828125	0.0474708
P55263-2;P55263;P55263-3;P55263-4	Adenosine kinase	ADK			+	21.403	21.6597	21.8705												Nervous system disease	Central Nervous system neoplasm	epilepsy	Astrocytoma											plasma membrane						nucleus	0.269544	0.042442	1551	0.5625	0.704907	0.640625	0.343885	0.65625	0.757134
P55268	Laminin subunit beta-2	LAMB2		+		20.9887	20.7733	27.8286	+			+		+						Nervous system disease	Central Nervous system neoplasm	epilepsy	Astrocytoma		Synapse											endoplasmic reticulum		Organelli			7.05402	1.5797	193	0.53125	0.716653	1	3.88389e-05	1	1.32485e-05
P55283;P55283-2	Cadherin-4	CDH4	+			26.0081	20.6261	22.0088	+	+	+			+						Nervous system disease	Central Nervous system neoplasm	epilepsy	Astrocytoma											plasma membrane							6.81977	1.5176	217	1	2.2619e-07	0.96875	0.000170349	0.78125	0.0478026
P55285-2;P55285	Cadherin-6	CDH6	+			25.7456	20.7176	21.4025	+	+	+			+						Nervous system disease														plasma membrane							4.82773	1.084	438	1	8.71623e-07	1	5.704e-05	0.65625	0.236144
P55286;P55289-2;P55289	Cadherin-8	CDH8	+			25.2585	20.6384	21.9863	+	+	+	+	+	+	+					Nervous system disease	Central Nervous system neoplasm		Astrocytoma	Medulloblastoma	Synapse									plasma membrane							10.373	2.2855	53	1	9.80385e-07	0.984375	0.000123107	0.890625	0.00891983
P55287-2;P55287	Cadherin-11	CDH11	+		+	24.9917	21.3413	20.9318	+	+	+			+						Nervous system disease	Central Nervous system neoplasm		Astrocytoma		Synapse									plasma membrane					cytoplasm		6.52552	1.4429	242	0.984375	0.000111158	1	9.72038e-06	0.609375	0.384062
P55290;P55290-4;P55290-5;P55290-3;P55290-2	Cadherin-13	CDH13	+		+	29.8762	24.7851	20.9948	+	+	+	+	+	+	+					Nervous system disease	Central Nervous system neoplasm		Astrocytoma											plasma membrane					cytoplasm		12.622	2.6692	19	1	3.95079e-06	1	4.86948e-11	0.953125	0.000161641
P55786;P55786-2;A6NEC2;A6NEC2-2;A6NEC2-3	Puromycin-sensitive aminopeptidase	NPEPPS		+	+	21.7603	25.5374	24.9477	+	+	+			+						Nervous system disease												M01.010							cytoplasm	nucleus	2.30337	0.53561	899	0.921875	0.000324112	0.875	0.00662211	0.5625	0.612225
P55957-2;P55957;P55957-4	BH3-interacting domain death agonist;BH3-interacting domain death agonist p15;BH3-interacting domain death agonist p13;BH3-interacting domain death agonist p11	BID	+			24.5382	20.5686	21.6432	+	+	+			+						Nervous system disease	Central Nervous system neoplasm	epilepsy	Astrocytoma														mitochondrion	Organelli			4.99824	1.1226	410	1	2.70936e-07	0.984375	0.000305186	0.765625	0.095393
P58417;O95156	Neurexophilin-1	NXPH1	+		+	24.7401	21.6051	20.7346	+	+	+			+						Nervous system disease	Central Nervous system neoplasm		Astrocytoma	Medulloblastoma																	4.70914	1.0705	450	0.984375	0.0003966	1	2.87866e-09	0.671875	0.195194
P58546	Myotrophin	MTPN	+		+	23.1202	23.38	21.7718	+			+		+						Nervous system disease																			cytoplasm	nucleus	0.714206	0.12174	1394	0.609375	0.672053	0.796875	0.0425151	0.84375	0.00586177
P59768	Guanine nucleotide-binding protein G(I)/G(S)/G(O) subunit gamma-2	GNG2			+	21.7015	24.7746	21.4769	+	+				+						Nervous system disease	Central Nervous system neoplasm	epilepsy	Astrocytoma		Synapse	Synaptosome	GABAergic synapse	Cholinergic synapse	Serotonergic synapse	Glutamatergic synapse				plasma membrane							3.70352	0.86677	607	1	1.38152e-05	0.5	0.664076	0.984375	0.000227837
P60033	CD81 antigen	CD81		+	+	21.5765	25.236	26.9631	+	+	+			+						Nervous system disease	Central Nervous system neoplasm	epilepsy	Astrocytoma								CD81			plasma membrane							5.35201	1.2062	364	0.984375	6.98593e-05	1	1.69419e-07	0.796875	0.0265851
P60174;P60174-1;P60174-4	Triosephosphate isomerase	TPI1	+	+	+	28.5589	29.0709	27.8782												Nervous system disease	Central Nervous system neoplasm	epilepsy	Astrocytoma	Medulloblastoma																nucleus	2.43352	0.56712	869	0.640625	0.544434	0.617188	0.225439	0.734375	0.14737
P60201;P60201-2	Myelin proteolipid protein	PLP1		+	+	21.3524	23.0441	22.1826												Nervous system disease	Central Nervous system neoplasm	epilepsy	Astrocytoma	Medulloblastoma	Synapse									plasma membrane							0.193072	0.024771	1581	0.65625	0.212372	0.515625	0.457903	0.640625	0.593883
P60228	Eukaryotic translation initiation factor 3 subunit E	EIF3E			+	21.5827	22.8364	20.7467	+			+		+						Nervous system disease	Central Nervous system neoplasm		Astrocytoma																cytoplasm	nucleus	1.47548	0.2895	1156	0.796875	0.0326964	0.765625	0.0907577	0.9375	0.000737274
P60660-2;P60660;P14649	Myosin light polypeptide 6	MYL6	+	+	+	22.9306	28.9677	26.5812	+	+	+			+						Nervous system disease																					6.36087	1.3966	261	1	1.05299e-07	0.984375	0.000274764	0.875	0.00255502
P60842;P60842-2	Eukaryotic initiation factor 4A-I	EIF4A1	+	+	+	22.2822	24.655	24.7524												Nervous system disease	Central Nervous system neoplasm	epilepsy	Astrocytoma																cytoplasm		1.07843	0.21286	1262	0.8125	0.0400557	0.828125	0.0414748	0.53125	0.935696
P60866;P60866-2	40S ribosomal protein S20	RPS20	+		+	21.7118	23.3397	21.754	+	+		+		+						Nervous system disease	Central Nervous system neoplasm	epilepsy	Astrocytoma	Medulloblastoma															cytoplasm		3.30851	0.77044	692	1	0.000722483	0.609375	0.930805	0.859375	0.00548726
P60891;P60891-2;P21108	Ribose-phosphate pyrophosphokinase 1	PRPS1	+	+	+	21.6185	24.7769	22.6795	+	+				+						Nervous system disease	Central Nervous system neoplasm		Astrocytoma																cytoplasm		2.21108	0.51199	919	0.9375	0.00298831	0.6875	0.182145	0.75	0.0700277
P60900;P60900-2;P60900-3	Proteasome subunit alpha type-6	PSMA6	+	+	+	23.2589	23.9863	25.2224												Nervous system disease	Central Nervous system neoplasm		Astrocytoma									T01.971							cytoplasm	nucleus	0.944916	0.18432	1311	0.671875	0.41304	0.84375	0.0190913	0.765625	0.075623
P60903	Protein S100-A10	S100A10		+	+	21.115	27.1907	25.5553	+	+	+			+						Nervous system disease	Central Nervous system neoplasm		Astrocytoma	Medulloblastoma										plasma membrane					cytoplasm		6.04256	1.3321	286	1	1.53247e-05	1	3.35045e-05	0.75	0.0952659
P60953;P60953-1	Cell division control protein 42 homolog	CDC42	+	+	+	21.6814	25.8851	26.1353	+	+	+			+						Nervous system disease	Central Nervous system neoplasm	epilepsy	Astrocytoma		Synapse									plasma membrane	Golgi	endoplasmic reticulum		Organelli	cytoplasm		5.90746	1.3053	306	1	9.36363e-06	1	4.10995e-06	0.59375	0.576157
P60981-2;P60981	Destrin	DSTN	+		+	22.0641	25.1387	22.0527	+	+		+		+						Nervous system disease																			cytoplasm		1.86817	0.40558	1019	0.84375	0.017735	0.546875	0.989796	0.890625	0.00386693
P61006;P61006-2	Ras-related protein Rab-8A	RAB8A		+	+	21.5319	22.3876	22.7283												Nervous system disease	Central Nervous system neoplasm		Astrocytoma	Medulloblastoma	Synapse									plasma membrane	Golgi			Organelli			2.44151	0.57373	865	0.734375	0.155939	0.75	0.0785785	0.625	0.577932
P61019;P61019-2;Q8WUD1;Q8WUD1-2	Ras-related protein Rab-2A;Ras-related protein Rab-2B	RAB2A;RAB2B		+	+	21.5448	24.7649	23.6434	+	+	+			+						Nervous system disease														plasma membrane	Golgi	endoplasmic reticulum		Organelli		nucleus	6.66176	1.4807	230	1	7.44243e-05	0.921875	0.00198987	0.6875	0.112062
P61020;P61020-2	Ras-related protein Rab-5B	RAB5B		+	+	21.7646	22.8604	22.3764																	Synapse									plasma membrane							0.55524	0.090351	1453	0.796875	0.0395951	0.671875	0.240519	0.59375	0.332651
P61026	Ras-related protein Rab-10	RAB10		+	+	21.4825	26.6062	25.7754	+	+	+			+						Nervous system disease					Synapse									plasma membrane	Golgi	endoplasmic reticulum		Organelli	cytoplasm		7.1194	1.59	190	1	5.74518e-09	1	1.2156e-07	0.828125	0.0429066
P62837-2;P62837;P61077;P61077-2;P61077-3;Q9Y2X8;P51668	Ubiquitin-conjugating enzyme E2 D2;Ubiquitin-conjugating enzyme E2 D3;Ubiquitin-conjugating enzyme E2 D4;Ubiquitin-conjugating enzyme E2 D1	UBE2D2;UBE2D3;UBE2D4;UBE2D1			+	21.5659	22.1427	21.5428												Nervous system disease	Central Nervous system neoplasm													plasma membrane					cytoplasm	nucleus	0.192301	0.024342	1582	0.671875	0.269031	0.523438	0.965847	0.640625	0.302545
P61088;Q5JXB2	Ubiquitin-conjugating enzyme E2 N;Putative ubiquitin-conjugating enzyme E2 N-like	UBE2N;UBE2NL	+	+	+	23.7155	24.2914	23.9546												Nervous system disease																			cytoplasm	nucleus	1.2743	0.25141	1209	0.5625	0.542382	0.5625	0.804687	0.617188	0.748975
P61106	Ras-related protein Rab-14	RAB14			+	22.1904	23.6638	21.2615	+	+		+		+						Nervous system disease														plasma membrane	Golgi	endoplasmic reticulum		Organelli	cytoplasm		1.86549	0.40555	1020	0.804688	0.0218817	0.71875	0.162725	0.875	0.00221426
P61158;Q9P1U1-2;Q9P1U1;Q9P1U1-3;Q9C0K3	Actin-related protein 3	ACTR3	+	+	+	25.5146	26.4468	26.8537												Nervous system disease	Central Nervous system neoplasm		Astrocytoma	Medulloblastoma															cytoplasm	nucleus	1.40693	0.27985	1172	0.625	0.222225	0.695312	0.124267	0.515625	0.689537
P61160;P61160-2	Actin-related protein 2	ACTR2	+	+	+	21.4894	25.8754	26.2276	+	+	+			+						Nervous system disease	Central Nervous system neoplasm	epilepsy			Synapse														cytoplasm	nucleus	3.98063	0.92286	554	0.984375	7.09123e-05	0.96875	0.000228106	0.546875	0.757293
P61163	Alpha-centractin	ACTR1A		+	+	21.386	24.5517	22.446	+	+				+						Nervous system disease	Central Nervous system neoplasm	epilepsy	Astrocytoma																cytoplasm		1.35788	0.26869	1186	0.875	0.00472324	0.65625	0.274356	0.765625	0.0508619
P61201;P61201-2	COP9 signalosome complex subunit 2	COPS2			+	21.286	24.3623	22.4061	+	+				+						Nervous system disease	Central Nervous system neoplasm																		cytoplasm	nucleus	1.89008	0.41547	1009	0.90625	0.00332299	0.796875	0.0380106	0.71875	0.0320302
P61204;P84077;P61204-2	ADP-ribosylation factor 3;ADP-ribosylation factor 1	ARF3;ARF1		+	+	21.0806	27.6421	27.441	+	+	+			+				+		Nervous system disease	Central Nervous system neoplasm		Astrocytoma		Synapse									plasma membrane	Golgi			Organelli	cytoplasm		8.90673	1.9784	97	1	1.84329e-10	1	7.49323e-12	0.546875	0.659879
P61224-3;P61224;P61224-2;A6NIZ1;P61224-4	Ras-related protein Rap-1b;Ras-related protein Rap-1b-like protein	RAP1B		+	+	21.3448	28.0657	27.5267	+	+	+			+						Nervous system disease	Central Nervous system neoplasm		Astrocytoma		Synapse									plasma membrane							8.34983	1.8149	118	1	1.90992e-10	1	2.06053e-09	0.703125	0.128847
P61225	Ras-related protein Rap-2b	RAP2B			+	21.0871	24.0773	21.4312	+	+		+		+						Nervous system disease	Central Nervous system neoplasm		Astrocytoma											plasma membrane							4.34307	0.9869	505	1	0.000111826	0.515625	0.53879	0.9375	0.00112767
P61278	Somatostatin;Somatostatin-28;Somatostatin-14	SST	+		+	23.7989	21.8491	21.0397	+	+	+			+						Nervous system disease	Central Nervous system neoplasm	epilepsy	Astrocytoma	Medulloblastoma	Synapse																3.3755	0.782	675	0.859375	0.00589087	1	3.49272e-05	0.59375	0.213627
P61421	V-type proton ATPase subunit d 1	ATP6V0D1			+	21.8054	23.5299	20.9098	+			+		+						Nervous system disease	Central Nervous system neoplasm		Astrocytoma		Synapse									plasma membrane							1.81472	0.38761	1039	0.78125	0.0762089	0.625	0.192471	0.875	0.006787
P61586	Transforming protein RhoA	RHOA		+	+	20.6757	26.6903	26.5	+	+	+			+						Nervous system disease	Central Nervous system neoplasm	epilepsy	Astrocytoma											plasma membrane		endoplasmic reticulum		Organelli	cytoplasm	nucleus	8.01409	1.7469	139	1	5.27887e-10	1	4.26417e-10	0.546875	0.715949
P61604	10 kDa heat shock protein, mitochondrial	HSPE1	+		+	22.1707	21.6809	20.7868												Nervous system disease																	mitochondrion	Organelli			0.971723	0.18829	1301	0.578125	0.47561	0.796875	0.0595426	0.765625	0.0533363
P61626	Lysozyme C	LYZ	+	+	+	28.6898	27.4367	30.1198	+			+		+						Nervous system disease	Central Nervous system neoplasm		Astrocytoma																		1.77416	0.37647	1052	0.75	0.120758	0.90625	0.00308726	0.875	0.00510814
P61764	Syntaxin-binding protein 1	STXBP1		+	+	20.9275	23.6944	23.6379	+	+	+			+						Nervous system disease	Central Nervous system neoplasm	epilepsy	Astrocytoma		Synapse	Synaptosome								plasma membrane			mitochondrion	Organelli	cytoplasm		1.92477	0.42442	998	0.953125	0.00094836	0.921875	0.00352252	0.515625	0.949618
P61769	Beta-2-microglobulin;Beta-2-microglobulin form pI 5.3	B2M	+	+	+	31.9208	30.5105	28.0477	+	+	+	+	+	+	+					Nervous system disease	Central Nervous system neoplasm	epilepsy	Astrocytoma											plasma membrane	Golgi	endoplasmic reticulum		Organelli			9.11784	2.0169	87	0.859375	0.00609006	1	8.6085e-09	1	2.03912e-05
P61916;P61916-2	Epididymal secretory protein E1	NPC2	+		+	27.1821	22.3846	21.2604	+	+	+			+						Nervous system disease	Central Nervous system neoplasm	epilepsy	Astrocytoma													endoplasmic reticulum		Organelli			7.5116	1.6369	169	0.984375	0.000106028	1	2.809e-09	0.578125	0.22915
P61970	Nuclear transport factor 2	NUTF2	+	+	+	25.1002	27.207	24.7835												Nervous system disease																					2.58321	0.60327	837	0.796875	0.0395076	0.59375	0.760286	0.671875	0.0558594
P61978-3;P61978;P61978-2	Heterogeneous nuclear ribonucleoprotein K	HNRNPK	+	+	+	22.0746	23.7854	23.3738	+	+				+						Nervous system disease	Central Nervous system neoplasm		Astrocytoma																cytoplasm	nucleus	0.799501	0.14072	1366	0.828125	0.0248097	0.734375	0.0704026	0.578125	0.60033
P61981	14-3-3 protein gamma;14-3-3 protein gamma, N-terminally processed	YWHAG	+	+	+	25.8031	26.7119	24.6711	+			+		+						Nervous system disease	Central Nervous system neoplasm	epilepsy	Astrocytoma		Synapse														cytoplasm		1.66476	0.34585	1090	0.742188	0.142371	0.78125	0.0897817	0.921875	0.00641988
P62070;P62070-4;P62070-3;P62070-2	Ras-related protein R-Ras2	RRAS2		+	+	21.6776	22.1084	23.5652												Nervous system disease	Central Nervous system neoplasm	epilepsy	Astrocytoma											plasma membrane	Golgi	endoplasmic reticulum		Organelli			1.34091	0.2671	1189	0.59375	0.54687	0.875	0.00777093	0.796875	0.0788826
P62136-2;P62136;P62136-3	Serine/threonine-protein phosphatase PP1-alpha catalytic subunit	PPP1CA	+	+	+	23.7996	23.5563	22.469												Nervous system disease	Central Nervous system neoplasm	epilepsy	Astrocytoma											plasma membrane					cytoplasm	nucleus	1.47829	0.29296	1154	0.625	0.622078	0.796875	0.049538	0.75	0.0914507
P62191	26S protease regulatory subunit 4	PSMC1			+	22.0946	24.4405	20.6188	+			+		+						Nervous system disease	Central Nervous system neoplasm		Astrocytoma																	nucleus	2.67898	0.62439	820	0.703125	0.0468591	0.8125	0.0547705	0.921875	0.00319056
P62195;P62195-2	26S protease regulatory subunit 8	PSMC5		+	+	21.2439	22.7261	21.5268												Nervous system disease					Synapse														cytoplasm	nucleus	0.384068	0.061596	1516	0.640625	0.188892	0.578125	0.703109	0.625	0.288154
P62258;P62258-2	14-3-3 protein epsilon	YWHAE	+	+	+	27.1467	28.7752	27.0384	+	+		+		+						Nervous system disease	Central Nervous system neoplasm	epilepsy	Astrocytoma		Synapse														cytoplasm	nucleus	2.71339	0.63215	814	0.875	0.00513412	0.53125	0.798495	0.96875	0.000351045
P62263	40S ribosomal protein S14	RPS14		+	+	21.44	22.5146	21.8464												Nervous system disease	Central Nervous system neoplasm	epilepsy			Synapse														cytoplasm		0.195213	0.024959	1580	0.734375	0.0530031	0.59375	0.541731	0.734375	0.163601
P62269	40S ribosomal protein S18	RPS18		+	+	21.2309	22.9646	21.532	+	+				+						Nervous system disease		epilepsy			Synapse														cytoplasm	nucleus	1.33255	0.26647	1190	0.90625	0.00250251	0.578125	0.623737	0.859375	0.0236854
P62328	Thymosin beta-4;Hematopoietic system regulatory peptide	TMSB4X	+	+	+	27.9297	24.5091	23.9138	+	+	+			+						Nervous system disease	Central Nervous system neoplasm		Astrocytoma																cytoplasm	nucleus	5.28321	1.192	372	1	3.73817e-05	1	3.23469e-05	0.5625	0.483655
P62333	26S protease regulatory subunit 10B	PSMC6			+	21.4845	24.1441	20.8189	+			+		+						Nervous system disease	Central Nervous system neoplasm																			nucleus	1.85193	0.39751	1025	0.78125	0.0243256	0.625	0.235997	0.828125	0.00895053
P62701;Q8TD47;P22090	40S ribosomal protein S4, X isoform;40S ribosomal protein S4, Y isoform 2;40S ribosomal protein S4, Y isoform 1	RPS4X;RPS4Y2;RPS4Y1		+	+	21.7949	23.9404	21.884	+	+				+						Nervous system disease	Central Nervous system neoplasm	epilepsy	Astrocytoma																cytoplasm	nucleus	1.94349	0.42826	988	0.8125	0.00905535	0.59375	0.902156	0.84375	0.0450651
P62805	Histone H4	HIST1H4A	+	+	+	25.1684	28.9769	31.4773	+	+	+			+								epilepsy																		nucleus	4.38742	0.99604	499	0.90625	0.00657205	1	2.05563e-05	0.875	0.014295
P62826	GTP-binding nuclear protein Ran	RAN	+	+	+	21.3043	27.7199	26.6242	+	+	+			+						Nervous system disease	Central Nervous system neoplasm		Astrocytoma																cytoplasm	nucleus	5.71958	1.2809	318	0.984375	0.000111066	1	3.37852e-05	0.65625	0.375461
Q5JNZ5;P62854	Putative 40S ribosomal protein S26-like 1;40S ribosomal protein S26	RPS26P11;RPS26		+	+	21.9074	22.6969	21.9382												Nervous system disease		epilepsy														endoplasmic reticulum		Organelli	cytoplasm		0.294219	0.048841	1537	0.734375	0.0901364	0.539062	0.955487	0.6875	0.181441
P62873-2;P62873	Guanine nucleotide-binding protein G(I)/G(S)/G(T) subunit beta-1	GNB1	+	+	+	21.4639	29.4663	27.6611	+	+	+	+	+	+	+	+			+	Nervous system disease	Central Nervous system neoplasm	epilepsy	Astrocytoma		Synapse	Synaptosome	GABAergic synapse	Cholinergic synapse	Serotonergic synapse	Glutamatergic synapse				plasma membrane					cytoplasm		17.7011	3.3368	1	1	1.12447e-10	1	1.54717e-09	1	1.02105e-05
P62906	60S ribosomal protein L10a	RPL10A		+	+	21.0149	24.2083	25.2004	+	+	+			+								epilepsy																	cytoplasm	nucleus	4.34944	0.9901	504	0.953125	0.00113664	0.9375	0.000462885	0.65625	0.391755
P62937;P0DN26;A0A0B4J2A2;A0A075B767;A0A075B759;Q9Y536;F5H284;P0DN37	Peptidyl-prolyl cis-trans isomerase A;Peptidyl-prolyl cis-trans isomerase A, N-terminally processed	PPIA	+	+	+	28.298	28.5456	27.6828												Nervous system disease	Central Nervous system neoplasm	epilepsy	Astrocytoma	Medulloblastoma															cytoplasm	nucleus	2.83142	0.65402	789	0.546875	0.507009	0.78125	0.0551038	0.828125	0.0167071
P62942	Peptidyl-prolyl cis-trans isomerase FKBP1A	FKBP1A	+	+	+	25.6868	22.5102	22.1843	+	+	+			+						Nervous system disease	Central Nervous system neoplasm	epilepsy	Astrocytoma																cytoplasm		2.59714	0.60572	832	0.9375	0.00359927	0.9375	0.000488347	0.515625	0.687647
P62993;P62993-2	Growth factor receptor-bound protein 2	GRB2	+		+	22.6043	23.2795	22.1642												Nervous system disease	Central Nervous system neoplasm		Astrocytoma											plasma membrane	Golgi			Organelli	cytoplasm	nucleus	0.334639	0.053399	1530	0.703125	0.369127	0.515625	0.544591	0.765625	0.038115
P63000-2;P63000;P60763	Ras-related C3 botulinum toxin substrate 1;Ras-related C3 botulinum toxin substrate 3	RAC1;RAC3		+	+	21.2198	24.6932	25.0426	+	+	+			+						Nervous system disease	Central Nervous system neoplasm		Astrocytoma		Synapse									plasma membrane	Golgi	endoplasmic reticulum		Organelli	cytoplasm	nucleus	2.29393	0.5335	901	0.953125	0.000941643	1	1.56957e-05	0.53125	0.693825
P63010-2;P63010;P63010-3	AP-2 complex subunit beta	AP2B1	+	+	+	25.1789	24.0985	24.3318												Nervous system disease		epilepsy			Synapse									plasma membrane					cytoplasm		0.10128	0.01203	1603	0.65625	0.224798	0.671875	0.538752	0.515625	0.864185
P63027;P23763-2;P23763-3;P23763	Vesicle-associated membrane protein 2	VAMP2	+	+	+	21.5001	23.1342	21.9454												Nervous system disease	Central Nervous system neoplasm	epilepsy	Astrocytoma	Medulloblastoma	Synapse	Synaptosome								plasma membrane	Golgi			Organelli	cytoplasm		0.497048	0.081049	1474	0.804688	0.0479087	0.546875	0.633301	0.640625	0.194796
P63092;P63092-4;Q5JWF2;P63092-3;P63092-2;Q5JWF2-2;P38405;P38405-2	Guanine nucleotide-binding protein G(s) subunit alpha isoforms short;Guanine nucleotide-binding protein G(s) subunit alpha isoforms XLas	GNAS		+	+	21.4943	25.9022	25.0208	+	+	+			+						Nervous system disease	Central Nervous system neoplasm	epilepsy	Astrocytoma	Medulloblastoma	Synapse	Synaptosome			Serotonergic synapse	Glutamatergic synapse				plasma membrane	Golgi			Organelli	cytoplasm		5.64196	1.2784	322	1	1.0882e-06	0.890625	0.00336568	0.578125	0.367311
P63096;P63096-2	Guanine nucleotide-binding protein G(i) subunit alpha-1	GNAI1		+	+	14.0471	21.967	21.6121	+					+			+			Nervous system disease	Central Nervous system neoplasm	epilepsy	Astrocytoma		Synapse	Synaptosome	GABAergic synapse	Cholinergic synapse	Serotonergic synapse	Glutamatergic synapse				plasma membrane					cytoplasm		0.170694	0.022209	1586	1	7.91603e-12	0.578125	0.425858	0.5625	0.578162
P63104;P63104-2;REV__P53355-4;REV__P53355;REV__P53355-3	14-3-3 protein zeta/delta	YWHAZ	+	+	+	29.0033	29.7374	28.1876	+			+		+						Nervous system disease	Central Nervous system neoplasm	epilepsy	Astrocytoma		Synapse														cytoplasm	nucleus	2.34867	0.54944	887	0.796875	0.152172	0.8125	0.0832873	0.9375	0.00101333
P63208;P63208-2	S-phase kinase-associated protein 1	SKP1	+		+	24.3221	21.3828	21.3017	+	+	+			+						Nervous system disease	Central Nervous system neoplasm		Astrocytoma																cytoplasm	nucleus	3.29938	0.76299	696	0.921875	0.00109583	0.9375	0.000274685	0.609375	0.878522
P63218	Guanine nucleotide-binding protein G(I)/G(S)/G(O) subunit gamma-5	GNG5		+	+	21.4963	23.5978	24.6402	+	+	+			+						Nervous system disease	Central Nervous system neoplasm		Astrocytoma		Synapse	Synaptosome	GABAergic synapse	Cholinergic synapse	Serotonergic synapse	Glutamatergic synapse				plasma membrane							5.4046	1.2129	358	1	7.19165e-05	1	6.54272e-06	0.820312	0.0198501
P63241;P63241-2;Q9GZV4;Q6IS14	Eukaryotic translation initiation factor 5A-1;Eukaryotic translation initiation factor 5A-2;Eukaryotic translation initiation factor 5A-1-like	EIF5A;EIF5A2;EIF5AL1	+	+	+	22.6528	27.0934	25.1537	+	+				+						Nervous system disease	Central Nervous system neoplasm		Astrocytoma	Medulloblastoma												endoplasmic reticulum		Organelli	cytoplasm	nucleus	1.85504	0.39801	1024	0.921875	0.00180488	0.78125	0.0575734	0.734375	0.163896
P63261	Actin, cytoplasmic 2;Actin, cytoplasmic 2, N-terminally processed	ACTG1	+	+	+	31.3753	34.5586	32.3973	+	+	+	+	+	+	+					Nervous system disease	Central Nervous system neoplasm	epilepsy	Astrocytoma		Synapse									plasma membrane						nucleus	9.13639	2.0176	86	1	7.8089e-08	0.890625	0.023678	0.953125	4.38202e-05
P67936	Tropomyosin alpha-4 chain	TPM4	+	+	+	22.8513	22.6364	21.8434												Nervous system disease																					0.162293	0.020605	1588	0.515625	0.825927	0.578125	0.278114	0.640625	0.218712
P68036;P68036-3;P68036-2;A0A1B0GUS4	Ubiquitin-conjugating enzyme E2 L3	UBE2L3	+	+	+	24.4767	25.7732	23.6084												Nervous system disease																			cytoplasm	nucleus	0.361635	0.056027	1524	0.625	0.273146	0.625	0.415461	0.734375	0.109956
P68104;Q5VTE0;P68104-2	Elongation factor 1-alpha 1;Putative elongation factor 1-alpha-like 3	EEF1A1;EEF1A1P5	+	+	+	24.902	29.8783	28.3309	+	+	+	+	+	+	+					Nervous system disease	Central Nervous system neoplasm	epilepsy	Astrocytoma											plasma membrane					cytoplasm	nucleus	13.2948	2.7817	12	1	5.86748e-09	1	9.90983e-06	0.890625	0.00227595
P68133	Actin, alpha skeletal muscle	ACTA1	+	+	+	29.1048	32.8768	30.6493	+	+	+			+						Nervous system disease		epilepsy																			4.46058	1.0102	487	1	2.28419e-07	0.921875	0.00132399	0.953125	0.000410397
P68363;P68363-2;Q9H853	Tubulin alpha-1B chain	TUBA1B	+	+	+	27.3001	32.336	30.8105	+	+	+			+						Nervous system disease	Central Nervous system neoplasm	epilepsy	Astrocytoma																cytoplasm		5.37321	1.2102	361	1	1.94919e-09	1	6.78351e-07	0.921875	0.000284158
P68371;A6NNZ2	Tubulin beta-4B chain	TUBB4B	+	+	+	21.0044	30.0374	28.4435	+	+	+			+			+			Nervous system disease	Central Nervous system neoplasm	epilepsy	Astrocytoma	Medulloblastoma															cytoplasm	nucleus	8.74719	1.9644	102	1	6.56788e-12	1	1.38612e-08	0.828125	0.017477
P68400;Q8NEV1;P68400-2	Casein kinase II subunit alpha;Casein kinase II subunit alpha 3	CSNK2A1;CSNK2A3		+	+	21.3167	22.5858	22.7515	+	+				+						Nervous system disease	Central Nervous system neoplasm	epilepsy	Astrocytoma										CSNK2A1	plasma membrane						nucleus	0.527998	0.085225	1464	0.859375	0.0139512	0.671875	0.101006	0.515625	0.835988
P68402;P68402-3;P68402-2;P68402-4	Platelet-activating factor acetylhydrolase IB subunit beta	PAFAH1B2		+	+	21.6425	25.3667	22.4742	+	+				+						Nervous system disease														plasma membrane					cytoplasm		4.08511	0.94003	542	0.921875	0.0016517	0.65625	0.300933	0.84375	0.0156767
P68431;Q16695;Q6NXT2	Histone H3.1;Histone H3.1t	HIST1H3A;HIST3H3	+	+	+	21.987	21.5633	26.0519	+			+		+						Nervous system disease	Central Nervous system neoplasm	epilepsy	Astrocytoma																	nucleus	3.78659	0.87755	594	0.5625	0.649489	0.9375	0.000581916	0.9375	0.000407003
P68871	Hemoglobin subunit beta;LVV-hemorphin-7;Spinorphin	HBB	+	+	+	35.6776	37.34	36.7465												Nervous system disease	Central Nervous system neoplasm		Astrocytoma																		0.81631	0.14614	1356	0.617188	0.120016	0.523438	0.355008	0.585938	0.4835
P69891	Hemoglobin subunit gamma-1	HBG1	+	+	+	27.8945	28.5659	29.3384												Nervous system disease																					0.677391	0.11212	1410	0.5625	0.707031	0.6875	0.308779	0.515625	0.687494
P69892	Hemoglobin subunit gamma-2	HBG2	+	+	+	32.4258	35.2497	34.0391												Nervous system disease	Central Nervous system neoplasm	epilepsy	Astrocytoma																		0.918171	0.17642	1319	0.78125	0.0318587	0.6875	0.198307	0.6875	0.325357
P69905	Hemoglobin subunit alpha	HBA1	+	+	+	35.2136	38.0074	36.9772	+	+				+																											1.58508	0.32322	1120	0.882812	0.0063918	0.742188	0.118608	0.664062	0.191484
P78310-5;P78310-7;P78310-2;P78310-6;P78310;P78310-4;P78310-3	Coxsackievirus and adenovirus receptor	CXADR	+		+	24.2284	22.2679	22.1957												Nervous system disease	Central Nervous system neoplasm	epilepsy	Astrocytoma											plasma membrane					cytoplasm		0.891824	0.16913	1333	0.78125	0.0358213	0.8125	0.028709	0.5625	0.933371
P78324;P78324-4;P78324-2;Q5TFQ8;Q9P1W8-3;O00241-2;Q9P1W8-4;Q9P1W8-2;Q9P1W8;O00241	Tyrosine-protein phosphatase non-receptor type substrate 1;Signal-regulatory protein beta-1 isoform 3	SIRPA;SIRPB1	+		+	26.3174	22.512	21.505	+	+	+			+						Nervous system disease	Central Nervous system neoplasm		Astrocytoma	Medulloblastoma							CD172a;CD172b;CD172g			plasma membrane							6.98792	1.5536	200	0.96875	0.000113369	1	1.02341e-06	0.6875	0.169876
P78344-2;P78344	Eukaryotic translation initiation factor 4 gamma 2	EIF4G2		+	+	20.6817	21.4871	21.2334												Nervous system disease	Central Nervous system neoplasm		Astrocytoma																		0.255517	0.037227	1559	0.734375	0.0394632	0.609375	0.31424	0.609375	0.624778
P78371;P78371-2	T-complex protein 1 subunit beta	CCT2		+	+	21.6564	25.5032	21.9946	+	+		+		+						Nervous system disease	Central Nervous system neoplasm		Astrocytoma																		4.85289	1.0873	434	0.984375	0.000571303	0.5625	0.625557	0.96875	0.00289063
P78417;P78417-3;P78417-2	Glutathione S-transferase omega-1	GSTO1	+	+	+	25.7365	26.482	25.8126												Nervous system disease	Central Nervous system neoplasm																		cytoplasm		0.323256	0.052011	1533	0.609375	0.525583	0.546875	0.93522	0.609375	0.593069
P78509-3;P78509-2;P78509	Reelin	RELN	+	+	+	25.0009	21.0859	22.4999	+	+				+						Nervous system disease	Central Nervous system neoplasm	epilepsy	Astrocytoma	Medulloblastoma	Synapse									plasma membrane					cytoplasm		2.51866	0.58822	852	0.914062	0.00119798	0.75	0.0412183	0.765625	0.103441
P79483	HLA class II histocompatibility antigen, DR beta 3 chain	HLA-DRB3		+	+	21.333	24.242	23.2141	+	+	+			+																				plasma membrane	Golgi	endoplasmic reticulum		Organelli			2.01285	0.44553	975	0.984375	0.000587543	0.859375	0.0174607	0.65625	0.277958
P80303-2;P80303	Nucleobindin-2;Nesfatin-1	NUCB2	+		+	23.6145	20.3613	20.6841	+	+	+			+								epilepsy												plasma membrane	Golgi	endoplasmic reticulum		Organelli			5.6183	1.2719	327	1	4.8056e-05	1	3.27696e-05	0.546875	0.495634
P80511	Protein S100-A12;Calcitermin	S100A12	+	+	+	22.7601	29.0387	28.5787	+	+	+			+						Nervous system disease	Central Nervous system neoplasm		Astrocytoma											plasma membrane					cytoplasm	nucleus	4.01167	0.92556	552	0.96875	0.000359925	0.890625	0.00206193	0.5	0.803839
P80723;P80723-2	Brain acid soluble protein 1	BASP1	+	+	+	28.0389	27.782	25.9612												Nervous system disease	Central Nervous system neoplasm		Astrocytoma											plasma membrane					cytoplasm	nucleus	7.39075	1.6265	174	0.609375	0.716847	0.859375	0.00700266	0.796875	0.0364118
P80748	Ig lambda chain V-III region LOI		+	+	+	28.4069	24.3925	28.1543	+	+		+		+																				plasma membrane							2.15936	0.49542	931	1	3.75371e-06	0.515625	0.627459	0.96875	6.90079e-05
P81605;P81605-2	Dermcidin;Survival-promoting peptide;DCD-1	DCD	+	+	+	24.7334	22.3137	23.7731												Nervous system disease		epilepsy																			0.82777	0.15047	1352	0.796875	0.0163681	0.59375	0.341317	0.6875	0.227883
P84243	Histone H3.3	H3F3A	+	+	+	24.0082	25.8147	30.0689	+			+		+							Central Nervous system neoplasm		Astrocytoma																	nucleus	3.69519	0.86385	610	0.703125	0.267506	1	1.06888e-05	0.882812	0.00760469
P98095-2;P98095	Fibulin-2	FBLN2	+	+	+	23.7926	21.6644	22.9958												Nervous system disease	Central Nervous system neoplasm		Astrocytoma																		1.53174	0.30708	1135	0.75	0.112024	0.515625	0.587515	0.578125	0.387287
P98160	Basement membrane-specific heparan sulfate proteoglycan core protein;Endorepellin;LG3 peptide	HSPG2	+	+	+	28.6645	24.1834	32.8043	+	+	+	+	+	+	+					Nervous system disease	Central Nervous system neoplasm	epilepsy	Astrocytoma											plasma membrane	Golgi			Organelli			10.5465	2.3171	47	0.867188	0.00377762	1	6.77387e-06	1	4.39895e-06
Q00013;Q00013-3;Q00013-2	55 kDa erythrocyte membrane protein	MPP1	+	+	+	21.2741	25.9019	22.3992	+	+				+																				plasma membrane							2.47999	0.58104	859	0.859375	0.00645812	0.703125	0.099016	0.796875	0.0324282
Q00169	Phosphatidylinositol transfer protein alpha isoform	PITPNA	+		+	21.9347	22.0512	21.6771												Nervous system disease		epilepsy																	cytoplasm	nucleus	0.257224	0.037275	1558	0.53125	0.868645	0.546875	0.6828	0.578125	0.525127
Q00325-2;Q00325	Phosphate carrier protein, mitochondrial	SLC25A3		+	+	21.6292	23.7919	21.5479												Nervous system disease														plasma membrane			mitochondrion	Organelli			1.04563	0.20513	1275	0.703125	0.0500189	0.5	0.913188	0.734375	0.0625038
Q00610-2;Q00610;P53675-2;P53675	Clathrin heavy chain 1	CLTC		+	+	21.3014	29.3185	27.5657	+	+	+	+	+	+	+					Nervous system disease	Central Nervous system neoplasm	epilepsy	Astrocytoma	Medulloblastoma										plasma membrane	Golgi			Organelli			12.6292	2.6786	18	1	5.68672e-10	1	2.70397e-08	0.875	0.00882657
Q00765;Q00765-2	Receptor expression-enhancing protein 5	REEP5		+	+	21.4767	22.2343	22.9581												Nervous system disease																endoplasmic reticulum		Organelli			0.908642	0.17284	1325	0.726562	0.153074	0.84375	0.0230052	0.734375	0.161202
Q00839;Q00839-2	Heterogeneous nuclear ribonucleoprotein U	HNRNPU	+	+	+	22.3534	23.5199	22.1626												Nervous system disease	Central Nervous system neoplasm	epilepsy	Astrocytoma																cytoplasm	nucleus	0.420385	0.066623	1503	0.59375	0.224221	0.53125	0.813919	0.65625	0.219363
Q01082;Q01082-2;Q01082-3;REV__P43681	Spectrin beta chain, non-erythrocytic 1	SPTBN1	+		+	24.4621	23.7123	21.6572												Nervous system disease	Central Nervous system neoplasm		Astrocytoma		Synapse									plasma membrane					cytoplasm		1.24363	0.24384	1217	0.5625	0.552359	0.8125	0.0150006	0.789062	0.0534663
Q01105-2;Q01105-3;Q01105-4;Q01105;P0DME0	Protein SET	SET			+	21.5502	24.2373	22.139												Nervous system disease	Central Nervous system neoplasm	epilepsy		Medulloblastoma												endoplasmic reticulum		Organelli	cytoplasm	nucleus	1.19385	0.23457	1234	0.796875	0.0382189	0.71875	0.326971	0.75	0.0919456
Q01432-6;Q01432;Q01432-5;Q01432-4;Q01432-3	AMP deaminase 3	AMPD3			+	21.2549	21.3121	21.5111												Nervous system disease																					0.764899	0.12867	1380	0.53125	0.941061	0.546875	0.664144	0.5625	0.817435
Q01459	Di-N-acetylchitobiase	CTBS	+			26.4146	20.4575	21.168	+	+	+			+						Nervous system disease																					8.39143	1.8326	116	1	9.63884e-10	1	2.5364e-08	0.78125	0.0959265
Q01469;A8MUU1	Fatty acid-binding protein, epidermal	FABP5	+	+	+	25.8151	25.5608	25.8542												Nervous system disease	Central Nervous system neoplasm	epilepsy	Astrocytoma		Synapse									plasma membrane					cytoplasm	nucleus	0.0549211	0.0055394	1609	0.53125	0.632208	0.53125	0.942789	0.59375	0.52687
Q01518;Q01518-2	Adenylyl cyclase-associated protein 1	CAP1	+	+	+	25.7957	27.8257	24.9259	+	+		+		+																				plasma membrane					cytoplasm		2.78693	0.63914	804	0.828125	0.012743	0.625	0.322605	0.921875	0.00290235
Q01650;Q9UM01;Q92536	Large neutral amino acids transporter small subunit 1	SLC7A5		+	+	20.8415	22.9018	22.3398	+	+				+						Nervous system disease	Central Nervous system neoplasm		Astrocytoma	Medulloblastoma										plasma membrane							1.66115	0.34361	1092	0.890625	0.0055822	0.796875	0.0422824	0.625	0.402734
Q01813;Q01813-2	ATP-dependent 6-phosphofructokinase, platelet type	PFKP		+	+	21.7141	24.2394	22.9277	+	+				+						Nervous system disease	Central Nervous system neoplasm		Astrocytoma																cytoplasm	nucleus	3.05	0.7016	749	0.921875	0.000657084	0.65625	0.187411	0.625	0.158595
Q01814-8;Q01814;Q01814-6;Q01814-5;Q01814-7;Q01814-2;Q01814-4;Q01814-3	Plasma membrane calcium-transporting ATPase 2	ATP2B2		+	+	22.3425	25.8514	26.8966	+	+	+			+						Nervous system disease	Central Nervous system neoplasm	epilepsy	Astrocytoma	Medulloblastoma	Synapse									plasma membrane					cytoplasm		7.54466	1.6548	167	1	2.47228e-06	1	1.81225e-06	0.75	0.132856
Q02094;Q02094-2	Ammonium transporter Rh type A	RHAG	+	+	+	21.3797	25.4363	23.1243	+	+				+						Nervous system disease											CD241			plasma membrane							2.56477	0.60044	840	0.9375	0.00346028	0.875	0.031476	0.703125	0.072309
Q02246	Contactin-2	CNTN2	+		+	29.0962	22.1463	20.9611	+	+	+			+						Nervous system disease	Central Nervous system neoplasm	epilepsy	Astrocytoma	Medulloblastoma	Synapse									plasma membrane							7.80562	1.6885	151	1	8.04155e-07	1	1.39729e-09	0.65625	0.18162
Q02388-2;Q02388	Collagen alpha-1(VII) chain	COL7A1		+		21.3984	20.5139	26.7165	+			+		+						Nervous system disease												I02.967			Golgi	endoplasmic reticulum		Organelli			6.43786	1.4243	251	0.828125	0.0868467	1	2.40676e-07	1	2.42032e-07
Q02487-2;Q02487	Desmocollin-2	DSC2	+			23.7506	20.535	21.3341	+	+	+			+						Nervous system disease	Central Nervous system neoplasm		Astrocytoma											plasma membrane		endoplasmic reticulum		Organelli	cytoplasm		4.41421	0.99943	497	1	2.62127e-05	0.875	0.00113456	0.765625	0.04868
Q02543	60S ribosomal protein L18a	RPL18A		+	+	21.6365	22.0265	22.1382												Nervous system disease		epilepsy																	cytoplasm		0.152515	0.018416	1591	0.632812	0.396995	0.59375	0.406224	0.53125	0.845065
Q02809;Q02809-2	Procollagen-lysine,2-oxoglutarate 5-dioxygenase 1	PLOD1	+	+	+	22.9993	20.09	24.9789	+	+		+		+						Nervous system disease		epilepsy														endoplasmic reticulum		Organelli			6.63249	1.4757	234	0.96875	0.000175026	0.78125	0.0267481	1	5.02093e-06
Q02818	Nucleobindin-1	NUCB1	+		+	28.2253	23.4223	20.7133	+	+	+			+						Nervous system disease	Central Nervous system neoplasm														Golgi	endoplasmic reticulum		Organelli			7.78777	1.6819	152	0.90625	0.000888472	1	7.12903e-10	0.84375	0.0290447
Q5TCH4-2;Q02928-2;Q5TCH4;Q02928	Cytochrome P450 4A22;Cytochrome P450 4A11	CYP4A22;CYP4A11	+			22.7726	20.868	21.5043												Nervous system disease	Central Nervous system neoplasm		Astrocytoma											plasma membrane		endoplasmic reticulum		Organelli	cytoplasm		1.16294	0.22778	1242	0.75	0.0130468	0.796875	0.129438	0.640625	0.191513
Q02952-3;Q02952-2;Q02952	A-kinase anchor protein 12	AKAP12	+		+	21.5249	23.3117	21.9105												Nervous system disease	Central Nervous system neoplasm		Astrocytoma		Synapse									plasma membrane					cytoplasm		0.66716	0.10816	1416	0.65625	0.165824	0.546875	0.595264	0.578125	0.22101
Q03113-3;Q03113-2;Q03113	Guanine nucleotide-binding protein subunit alpha-12	GNA12		+		21.5334	20.4748	23.0173	+	+		+		+						Nervous system disease	Central Nervous system neoplasm		Astrocytoma											plasma membrane					cytoplasm		1.93895	0.42707	990	0.890625	0.0086989	0.703125	0.102573	0.796875	0.00752965
Q03167-2;Q03167	Transforming growth factor beta receptor type 3	TGFBR3	+			24.6221	20.4751	21.0162	+	+	+			+						Nervous system disease		epilepsy												plasma membrane					cytoplasm		7.72857	1.6793	155	1	1.21603e-07	1	1.18825e-09	0.65625	0.198987
Q03591	Complement factor H-related protein 1	CFHR1	+	+	+	26.6828	24.5688	27.9178	+	+	+	+	+	+	+					Nervous system disease	Central Nervous system neoplasm	epilepsy																			9.23482	2.034	84	0.84375	0.0229288	0.921875	0.0017855	0.984375	0.000896222
Q04756;CON__ENSEMBL:ENSBTAP00000023055	Hepatocyte growth factor activator;Hepatocyte growth factor activator short chain;Hepatocyte growth factor activator long chain	HGFAC	+	+		23.9521	20.8013	22.1083	+	+				+						Nervous system disease	Central Nervous system neoplasm		Astrocytoma									S01.228				endoplasmic reticulum		Organelli			1.6091	0.32873	1112	0.84375	0.00251302	0.6875	0.123402	0.703125	0.184901
Q04917;REV__Q7Z5H3-4;REV__Q7Z5H3-3;REV__P13521;REV__Q7Z5H3;REV__Q7Z5H3-5;REV__Q7Z5H3-2	14-3-3 protein eta	YWHAH	+	+	+	23.5387	23.5656	23.6842												Nervous system disease	Central Nervous system neoplasm		Astrocytoma	Medulloblastoma	Synapse									plasma membrane					cytoplasm		0.00166653	2.5085e-05	1622	0.515625	0.970235	0.5	0.835995	0.5	0.848426
Q05682-5;Q05682-4;Q05682-3;Q05682-6;Q05682-2;Q05682	Caldesmon	CALD1			+	21.304	21.396	21.1555												Nervous system disease	Central Nervous system neoplasm	epilepsy		Medulloblastoma										plasma membrane							0.0103813	3.7055e-05	1621	0.515625	0.868444	0.546875	0.789918	0.515625	0.615897
Q06033-2;Q06033	Inter-alpha-trypsin inhibitor heavy chain H3	ITIH3	+	+	+	28.5261	24.4855	26.4991	+	+				+						Nervous system disease	Central Nervous system neoplasm		Astrocytoma																		1.71446	0.36196	1072	0.9375	0.0024726	0.78125	0.0324364	0.65625	0.109805
Q06323;Q06323-3;Q06323-2	Proteasome activator complex subunit 1	PSME1	+	+	+	22.5377	25.3653	23.2766												Nervous system disease	Central Nervous system neoplasm		Astrocytoma																cytoplasm		0.820384	0.14951	1354	0.8125	0.0676176	0.703125	0.541803	0.78125	0.0869517
Q06481;Q06481-3;Q06481-6;Q06481-2;Q06481-4;Q06481-5	Amyloid-like protein 2	APLP2	+	+	+	25.9866	25.9107	25.0135												Nervous system disease	Central Nervous system neoplasm		Astrocytoma		Synapse							I02.016		plasma membrane		endoplasmic reticulum		Organelli		nucleus	0.459874	0.073294	1489	0.5	0.965059	0.625	0.55356	0.609375	0.703573
Q06828	Fibromodulin	FMOD	+		+	21.9762	21.0131	21.06												Nervous system disease	Central Nervous system neoplasm	epilepsy	Astrocytoma												Golgi			Organelli			5.44508	1.2225	354	0.640625	0.310302	0.578125	0.289801	0.515625	0.930595
Q06830	Peroxiredoxin-1	PRDX1	+	+	+	26.9929	27.8304	26.6517												Nervous system disease	Central Nervous system neoplasm	epilepsy	Astrocytoma	Medulloblastoma															cytoplasm	nucleus	1.61316	0.32925	1111	0.796875	0.163538	0.5	0.59236	0.875	0.0192199
Q07866-8;Q07866-2;Q07866-3;Q07866;Q07866-7;Q07866-5;Q07866-10;Q07866-6;Q07866-4;Q07866-9;Q9H0B6-2;Q9H0B6;Q9NSK0-4;Q9NSK0;Q9NSK0-3	Kinesin light chain 1	KLC1			+	21.7224	22.1539	22.231												Nervous system disease	Central Nervous system neoplasm		Astrocytoma											plasma membrane			mitochondrion	Organelli	cytoplasm		0.131167	0.015307	1595	0.578125	0.402231	0.625	0.31688	0.546875	0.875199
Q07954;Q07954-2	Prolow-density lipoprotein receptor-related protein 1;Low-density lipoprotein receptor-related protein 1 85 kDa subunit;Low-density lipoprotein receptor-related protein 1 515 kDa subunit;Low-density lipoprotein receptor-related protein 1 intracellular domain	LRP1	+	+	+	24.7085	22.6195	23.779	+	+				+						Nervous system disease	Central Nervous system neoplasm		Astrocytoma		Synapse						CD91			plasma membrane	Golgi			Organelli		nucleus	2.84008	0.6596	786	0.890625	0.00700286	0.625	0.258392	0.703125	0.158342
Q07960	Rho GTPase-activating protein 1	ARHGAP1			+	21.1335	23.0084	21.3737	+	+				+						Nervous system disease	Central Nervous system neoplasm		Astrocytoma																cytoplasm		0.847139	0.15792	1343	0.84375	0.0268762	0.59375	0.597057	0.84375	0.0410193
Q08174;Q08174-2	Protocadherin-1	PCDH1	+			25.3487	20.866	21.5515	+	+	+			+						Nervous system disease														plasma membrane							3.81382	0.88392	587	0.9375	0.000284814	0.875	0.00162396	0.6875	0.21796
Q08209-2;Q08209;Q08209-3;Q08209-5;P16298-2;P16298-3;P16298;P16298-4;Q08209-4	Serine/threonine-protein phosphatase 2B catalytic subunit alpha isoform;Serine/threonine-protein phosphatase 2B catalytic subunit beta isoform	PPP3CA;PPP3CB			+	21.8643	21.8493	21.2777												Nervous system disease	Central Nervous system neoplasm	epilepsy	Astrocytoma	Medulloblastoma	Synapse	Synaptosome				Glutamatergic synapse				plasma membrane			mitochondrion	Organelli	cytoplasm		0.126049	0.013404	1598	0.546875	0.976971	0.71875	0.387921	0.703125	0.445724
Q08257;Q08257-3;Q08257-2	Quinone oxidoreductase	CRYZ		+	+	20.905	21.5361	22.1915												Nervous system disease	Central Nervous system neoplasm		Astrocytoma																		1.67557	0.34706	1087	0.671875	0.338367	0.796875	0.07176	0.578125	0.331803
Q08357	Sodium-dependent phosphate transporter 2	SLC20A2		+	+	21.6694	25.1417	24.0994	+	+				+						Nervous system disease		epilepsy												plasma membrane							2.50186	0.5848	854	0.9375	0.000547376	0.796875	0.0351878	0.625	0.362774
Q08380	Galectin-3-binding protein	LGALS3BP	+	+	+	30.745	27.3196	30.9552	+	+		+		+						Nervous system disease	Central Nervous system neoplasm	epilepsy	Astrocytoma	Medulloblastoma																	2.08183	0.47256	951	1	7.65227e-05	0.546875	0.558572	1	1.51371e-05
Q08431;Q08431-4;Q08431-3	Lactadherin;Lactadherin short form;Medin	MFGE8	+	+	+	22.6443	30.5626	29.3434	+	+	+			+						Nervous system disease	Central Nervous system neoplasm		Astrocytoma											plasma membrane		endoplasmic reticulum		Organelli			7.71975	1.6787	156	1	3.1483e-10	1	4.2837e-09	0.828125	0.0197
Q08495;Q08495-2;Q08495-3;Q08495-4	Dematin	DMTN	+		+	21.5777	22.239	21.6898												Nervous system disease	Central Nervous system neoplasm		Astrocytoma	Medulloblastoma	Synapse									plasma membrane					cytoplasm		0.0646903	0.0066723	1608	0.625	0.352612	0.546875	0.888682	0.640625	0.3458
Q08554-2;Q08554	Desmocollin-1	DSC1		+	+	20.9028	22.9556	23.8348												Nervous system disease	Central Nervous system neoplasm	epilepsy	Astrocytoma											plasma membrane							0.981452	0.19288	1294	0.703125	0.111135	0.8125	0.0120619	0.578125	0.562761
Q08629	Testican-1	SPOCK1	+		+	24.5586	20.8674	21.4998	+	+	+			+						Nervous system disease	Central Nervous system neoplasm		Astrocytoma		Synapse							I31.006							cytoplasm		7.61842	1.6607	163	1	6.91527e-06	0.96875	0.00036348	0.609375	0.269322
Q08722-2;Q08722-3;Q08722-4;Q08722	Leukocyte surface antigen CD47	CD47		+	+	21.2075	24.7325	21.4762	+	+		+		+						Nervous system disease	Central Nervous system neoplasm		Astrocytoma	Medulloblastoma							CD47			plasma membrane							3.32759	0.77277	686	1	9.36579e-05	0.515625	0.683177	0.9375	0.000681677
Q08830	Fibrinogen-like protein 1	FGL1		+		20.9179	19.9324	24.8742												Nervous system disease																					5.05871	1.1393	400	0.796875	0.0232743	0.953125	0.000795607	1	9.57124e-05
Q09328	Alpha-1,6-mannosylglycoprotein 6-beta-N-acetylglucosaminyltransferase A	MGAT5	+			24.1229	20.6601	21.3561	+	+	+			+						Nervous system disease	Central Nervous system neoplasm		Astrocytoma												Golgi			Organelli			5.48964	1.2386	347	0.96875	3.42531e-06	0.9375	0.000725002	0.71875	0.18237
Q09666;Q09666-2	Neuroblast differentiation-associated protein AHNAK	AHNAK		+	+	20.7517	28.7552	24.8621	+	+	+	+	+	+	+	+				Nervous system disease	Central Nervous system neoplasm		Astrocytoma											plasma membrane					cytoplasm	nucleus	14.7921	2.9768	7	1	3.92449e-07	1	1.09892e-06	1	0.000442396
Q0P6D2;Q0P6D2-2	Protein FAM69C	FAM69C	+			23.2388	19.9078	20.783	+	+	+			+						Nervous system disease																endoplasmic reticulum		Organelli			6.78176	1.5028	223	0.953125	0.000186372	0.875	0.00156184	0.78125	0.0467708
Q10471;Q10471-2	Polypeptide N-acetylgalactosaminyltransferase 2;Polypeptide N-acetylgalactosaminyltransferase 2 soluble form	GALNT2	+	+		24.9718	20.8535	21.3194	+	+	+			+						Nervous system disease	Central Nervous system neoplasm		Astrocytoma												Golgi	endoplasmic reticulum		Organelli	cytoplasm		5.44883	1.2243	353	1	1.21556e-08	1	6.25265e-06	0.59375	0.334005
Q10567-4;Q10567-3;Q10567-2;Q10567	AP-1 complex subunit beta-1	AP1B1			+	20.9968	23.3173	21.6275	+	+				+						Nervous system disease	Central Nervous system neoplasm		Astrocytoma												Golgi			Organelli	cytoplasm		1.18622	0.23357	1236	0.8125	0.0256208	0.671875	0.334898	0.734375	0.0903742
Q10588;Q10588-2	ADP-ribosyl cyclase/cyclic ADP-ribose hydrolase 2	BST1		+	+	22.1553	24.4676	22.8661	+	+				+						Nervous system disease											CD157			plasma membrane							2.23164	0.52132	911	0.890625	0.00393936	0.6875	0.404252	0.78125	0.10225
Q12805-2;Q12805-4;Q12805-3;Q12805	EGF-containing fibulin-like extracellular matrix protein 1	EFEMP1	+	+	+	29.1156	24.445	27.9383	+	+				+						Nervous system disease	Central Nervous system neoplasm		Astrocytoma	Medulloblastoma																	3.81417	0.88481	586	0.804688	0.00676351	0.78125	0.0638063	0.734375	0.0411217
Q12805-5	EGF-containing fibulin-like extracellular matrix protein 1	EFEMP1				20.5426	20.7532	21.3173												Nervous system disease	Central Nervous system neoplasm		Astrocytoma	Medulloblastoma																	5.46184	1.227	352	0.59375	0.626977	0.671875	0.144517	0.609375	0.30568
Q12841;Q12841-2	Follistatin-related protein 1	FSTL1	+	+	+	28.2826	23.5894	23.3429	+	+	+			+						Nervous system disease	Central Nervous system neoplasm		Astrocytoma									I01.967				endoplasmic reticulum		Organelli			4.24368	0.96591	521	0.921875	0.00069022	1	3.79423e-05	0.515625	0.847551
Q12846;Q12846-2	Syntaxin-4	STX4			+	21.4723	23.8796	21.4147	+	+		+		+						Nervous system disease		epilepsy			Synapse	Synaptosome								plasma membrane	Golgi			Organelli	cytoplasm		2.92351	0.67828	770	0.96875	0.000119516	0.5625	0.918543	0.9375	0.00126584
Q12860;Q12860-2;Q12860-3	Contactin-1	CNTN1	+	+	+	30.7192	24.5937	22.8175	+	+	+			+						Nervous system disease	Central Nervous system neoplasm	epilepsy	Astrocytoma		Synapse									plasma membrane							5.04082	1.1286	403	1	2.73835e-05	1	4.14713e-07	0.6875	0.204201
Q12907	Vesicular integral-membrane protein VIP36	LMAN2	+		+	28.3746	23.9168	21.0207	+	+	+	+	+	+	+			+		Nervous system disease														plasma membrane	Golgi	endoplasmic reticulum		Organelli			10.4466	2.2918	52	1	1.1451e-05	1	9.36906e-13	0.945312	0.00131189
Q12913;Q12913-2	Receptor-type tyrosine-protein phosphatase eta	PTPRJ		+	+	21.8795	25.6498	23.8153	+	+				+						Nervous system disease	Central Nervous system neoplasm		Astrocytoma								CD148			plasma membrane							3.99548	0.92385	553	1	3.45874e-05	0.8125	0.0264944	0.75	0.0783592
Q12974-2;Q12974-3;Q12974-4;Q12974;Q93096	Protein tyrosine phosphatase type IVA 2;Protein tyrosine phosphatase type IVA 1	PTP4A2;PTP4A1			+	21.0498	21.5645	20.8424												Nervous system disease														plasma membrane		endoplasmic reticulum		Organelli	cytoplasm	nucleus	1.40824	0.28099	1171	0.625	0.314701	0.609375	0.662317	0.703125	0.147265
Q12979-4;Q12979-2;Q12979;Q12979-3;P11274-2;P11274	Active breakpoint cluster region-related protein	ABR			+	21.3543	21.858	21.9718												Nervous system disease	Central Nervous system neoplasm	epilepsy	Astrocytoma	Medulloblastoma	Synapse								ABR;BCR	plasma membrane							0.543054	0.090136	1454	0.65625	0.31739	0.671875	0.265941	0.546875	0.786858
Q13099;Q13099-2;Q13099-3	Intraflagellar transport protein 88 homolog	IFT88		+	+	21.0072	23.6445	23.8206	+	+	+			+						Nervous system disease	Central Nervous system neoplasm		Astrocytoma																		1.57713	0.32229	1123	0.875	0.01997	0.78125	0.020987	0.515625	0.894668
Q13103	Secreted phosphoprotein 24	SPP2		+	+	21.26	25.6028	25.2451	+	+	+			+						Nervous system disease	Central Nervous system neoplasm		Astrocytoma													endoplasmic reticulum		Organelli			5.32431	1.1964	367	0.953125	0.000201144	0.984375	4.35478e-05	0.578125	0.712604
Q13126-4;Q13126;Q13126-3;Q13126-2;Q13126-7;Q13126-6;Q13126-5	S-methyl-5-thioadenosine phosphorylase	MTAP	+		+	21.1832	23.7741	21.4827												Nervous system disease	Central Nervous system neoplasm		Astrocytoma																		1.87021	0.40772	1017	0.796875	0.0277559	0.515625	0.692918	0.796875	0.0210335
Q13200;Q13200-3	26S proteasome non-ATPase regulatory subunit 2	PSMD2		+	+	21.0755	24.7543	23.6617	+	+	+			+																										nucleus	2.43382	0.57006	868	1	0.00159246	0.984375	0.00153915	0.625	0.336832
Q13200-2	26S proteasome non-ATPase regulatory subunit 2	PSMD2		+		21.3475	20.3942	22.8927	+			+		+																										nucleus	1.88419	0.41415	1012	0.671875	0.126473	0.828125	0.0703124	0.859375	0.00209332
Q13217	DnaJ homolog subfamily C member 3	DNAJC3			+	21.7932	23.3573	21.3081												Nervous system disease																endoplasmic reticulum		Organelli	cytoplasm		3.80568	0.88147	591	0.703125	0.134438	0.640625	0.383411	0.773438	0.052391
Q13228;Q13228-4;Q13228-2;Q13228-3	Selenium-binding protein 1	SELENBP1	+	+	+	26.9938	27.7529	28.1711												Nervous system disease	Central Nervous system neoplasm	epilepsy	Astrocytoma																		0.517018	0.083953	1467	0.5625	0.627606	0.640625	0.425535	0.546875	0.811678
Q13231-3;Q13231;Q13231-2;Q13231-4	Chitotriosidase-1	CHIT1	+		+	26.1055	20.624	21.8377	+	+	+			+						Nervous system disease																					3.85619	0.89077	580	0.96875	0.000211405	0.90625	0.0026954	0.71875	0.135986
Q13283	Ras GTPase-activating protein-binding protein 1	G3BP1			+	20.8938	21.3404	21.6272												Nervous system disease	Central Nervous system neoplasm	epilepsy	Astrocytoma																cytoplasm	nucleus	1.06922	0.21192	1265	0.625	0.318755	0.71875	0.197748	0.578125	0.617705
Q13308-4;Q13308;Q13308-6;Q13308-2;Q13308-5;Q13308-3	Inactive tyrosine-protein kinase 7	PTK7	+	+	+	23.536	22.8386	22.7039												Nervous system disease	Central Nervous system neoplasm		Astrocytoma	Medulloblastoma									PTK7	plasma membrane							0.132794	0.015968	1594	0.640625	0.357471	0.6875	0.336207	0.5625	0.865844
Q13332-6;Q13332-2;Q13332-7;Q13332-3;Q13332-4;Q13332;Q13332-5	Receptor-type tyrosine-protein phosphatase S	PTPRS	+			27.6534	20.48	20.9916	+	+	+			+						Nervous system disease		epilepsy			Synapse									plasma membrane							8.57225	1.8937	107	1	2.65427e-10	1	6.74289e-10	0.6875	0.194925
Q13362-4;Q13362-2;Q13362-3;Q14738-3;Q13362;Q13362-5;Q14738-2;Q14738	Serine/threonine-protein phosphatase 2A 56 kDa regulatory subunit gamma isoform;Serine/threonine-protein phosphatase 2A 56 kDa regulatory subunit delta isoform	PPP2R5C;PPP2R5D		+		20.9002	20.2736	26.5159	+			+		+						Nervous system disease	Central Nervous system neoplasm	epilepsy		Medulloblastoma											Golgi			Organelli		nucleus	4.95356	1.1139	417	0.59375	0.318419	1	9.7925e-06	1	1.01173e-06
Q13404;Q13404-7;Q13404-2;Q13404-1;Q13404-8;Q15819;Q13404-6	Ubiquitin-conjugating enzyme E2 variant 1;Ubiquitin-conjugating enzyme E2 variant 2	UBE2V1;UBE2V2	+		+	25.0555	24.524	21.9009												Nervous system disease	Central Nervous system neoplasm		Astrocytoma																cytoplasm	nucleus	1.76242	0.37603	1054	0.75	0.653976	0.875	0.00439294	0.90625	0.014685
Q13418;Q13418-3;Q13418-2	Integrin-linked protein kinase	ILK			+	21.7399	24.1932	22.3968												Nervous system disease	Central Nervous system neoplasm		Astrocytoma	Medulloblastoma									ILK	plasma membrane							1.32088	0.26318	1194	0.625	0.0754821	0.671875	0.30582	0.578125	0.20302
Q13444-10;Q13444-9;Q13444-8;Q13444-2;Q13444-7;Q13444-6;Q13444-12;Q13444-5;Q13444-4;Q13444-3;Q13444;Q13444-13;Q13444-11	Disintegrin and metalloproteinase domain-containing protein 15	ADAM15				21.624	20.5258	21.535	+	+				+						Nervous system disease												M12.215		plasma membrane							6.45909	1.4327	248	0.820312	0.0237174	0.5625	0.850686	0.828125	0.0190361
Q13449	Limbic system-associated membrane protein	LSAMP	+		+	28.8531	25.9832	21.3591	+	+	+	+	+	+	+				+	Nervous system disease	Central Nervous system neoplasm		Astrocytoma	Medulloblastoma										plasma membrane							11.4121	2.5269	31	0.984375	0.000271523	1	3.40637e-11	1	5.57588e-06
Q13488	V-type proton ATPase 116 kDa subunit a isoform 3	TCIRG1			+	20.7281	22.3948	21.2144	+	+				+						Nervous system disease		epilepsy												plasma membrane						nucleus	1.54639	0.31112	1133	0.929688	0.00658356	0.625	0.265124	0.796875	0.0594456
Q13491-4;Q13491-3;Q13491;Q13491-2	Neuronal membrane glycoprotein M6-b	GPM6B		+	+	20.3271	25.4381	24.0682	+	+	+			+						Nervous system disease	Central Nervous system neoplasm		Astrocytoma	Medulloblastoma										plasma membrane							3.36097	0.77956	678	1	1.21993e-05	1	0.00142617	0.65625	0.252464
Q13509;Q13509-2	Tubulin beta-3 chain	TUBB3		+	+	20.5057	26.21	24.2402	+	+	+			+						Nervous system disease	Central Nervous system neoplasm	epilepsy	Astrocytoma	Medulloblastoma															cytoplasm	nucleus	3.5388	0.82708	641	1	1.22022e-05	0.90625	0.00242838	0.71875	0.156419
Q13546-2;Q13546	Receptor-interacting serine/threonine-protein kinase 1	RIPK1		+	+	21.3234	22.0434	27.9004	+			+		+						Nervous system disease	Central Nervous system neoplasm		Astrocytoma	Medulloblastoma									RIPK1	plasma membrane			mitochondrion	Organelli			6.56993	1.4625	237	0.625	0.245464	1	5.72058e-07	1	1.82427e-06
Q13554-4;Q13554-8;Q13554-5;Q13554-2;Q13554;Q13554-7;Q13554-3;Q13554-6	Calcium/calmodulin-dependent protein kinase type II subunit beta	CAMK2B	+	+	+	23.2845	25.7558	22.9832												Nervous system disease	Central Nervous system neoplasm		Astrocytoma	Medulloblastoma	Synapse	Synaptosome		Cholinergic synapse					CAMK2B	plasma membrane					cytoplasm		0.795905	0.13978	1369	0.734375	0.16542	0.515625	0.828734	0.71875	0.143827
Q13555-4;Q13555;Q13555-6;Q13555-10;Q13555-3;Q13555-5;Q13555-7;Q13555-11;Q13555-9;Q13555-2;Q13555-8	Calcium/calmodulin-dependent protein kinase type II subunit gamma	CAMK2G			+	20.9805	23.4512	21.0586	+	+				+						Nervous system disease	Central Nervous system neoplasm		Astrocytoma	Medulloblastoma	Synapse	Synaptosome		Cholinergic synapse					CAMK2G	plasma membrane					cytoplasm		1.81085	0.38408	1043	0.8125	0.0264689	0.515625	0.875104	0.765625	0.039213
Q13561;Q13561-3;Q13561-2	Dynactin subunit 2	DCTN2			+	21.4293	23.0339	20.6135	+	+		+		+						Nervous system disease	Central Nervous system neoplasm																		cytoplasm		1.92572	0.42548	996	0.859375	0.0176516	0.796875	0.096853	0.890625	0.000898679
Q13576;Q13576-3;Q13576-2	Ras GTPase-activating-like protein IQGAP2	IQGAP2			+	21.6003	24.4055	21.3519	+	+				+						Nervous system disease	Central Nervous system neoplasm	epilepsy	Astrocytoma	Medulloblastoma										plasma membrane					cytoplasm		2.34481	0.54507	891	0.859375	0.015235	0.53125	0.668938	0.875	0.00837818
Q13616	Cullin-1	CUL1	+			25.3399	20.7977	22.1809	+	+	+			+						Nervous system disease	Central Nervous system neoplasm	epilepsy	Astrocytoma											plasma membrane					cytoplasm	nucleus	5.33744	1.1972	366	0.984375	1.33026e-05	0.921875	0.000515671	0.78125	0.0357833
Q13634-2;Q13634	Cadherin-18	CDH18	+			20.5685	20.6339	21.509												Nervous system disease	Central Nervous system neoplasm		Astrocytoma		Synapse									plasma membrane							0.477348	0.076824	1483	0.53125	0.945258	0.609375	0.344969	0.75	0.107731
Q13636;Q9UL26	Ras-related protein Rab-31	RAB31		+	+	21.0336	22.4553	22.2259	+	+				+						Nervous system disease	Central Nervous system neoplasm		Astrocytoma	Medulloblastoma										plasma membrane	Golgi			Organelli			0.693383	0.11792	1404	0.890625	0.00502651	0.664062	0.16836	0.546875	0.80079
Q13740-2;Q13740;Q13740-4;Q13740-3	CD166 antigen	ALCAM	+			27.4871	20.688	21.9432	+	+	+	+	+	+	+					Nervous system disease	Central Nervous system neoplasm		Astrocytoma	Medulloblastoma							CD166			plasma membrane							12.4161	2.6033	22	1	2.35277e-11	1	1.99895e-09	0.890625	0.0060723
Q13790	Apolipoprotein F	APOF	+	+	+	22.2191	22.0409	22.0724												Nervous system disease	Central Nervous system neoplasm		Astrocytoma																		1.42658	0.28422	1168	0.5	0.877149	0.546875	0.887521	0.53125	0.97523
Q13813-2;Q13813	Spectrin alpha chain, non-erythrocytic 1	SPTAN1	+	+	+	22.4642	25.3398	21.8356	+			+		+						Nervous system disease	Central Nervous system neoplasm	epilepsy	Astrocytoma											plasma membrane							1.5524	0.31271	1131	0.765625	0.0766522	0.53125	0.60205	0.8125	0.00962525
Q13822-3			+	+	+	32.4063	25.8322	27.9629	+	+	+			+						Nervous system disease	Central Nervous system neoplasm		Astrocytoma	Medulloblastoma										plasma membrane							3.34638	0.77936	679	0.96875	0.000371158	0.9375	0.00432111	0.65625	0.250392
Q13867	Bleomycin hydrolase	BLMH	+		+	21.7912	23.0636	21.2606	+			+		+						Nervous system disease												C01.084							cytoplasm	nucleus	1.50767	0.29939	1142	0.765625	0.0680062	0.546875	0.414407	0.84375	0.00745242
Q13938-4;Q13938;Q13938-3	Calcyphosin	CAPS		+	+	21.8427	25.0914	22.9775	+	+				+						Nervous system disease	Central Nervous system neoplasm													plasma membrane							1.88665	0.41468	1011	0.984375	0.000773314	0.625	0.145238	0.765625	0.041376
Q14019	Coactosin-like protein	COTL1	+	+	+	27.1278	22.9412	22.2988	+	+	+			+						Nervous system disease	Central Nervous system neoplasm		Astrocytoma																	nucleus	3.87354	0.89578	577	0.953125	0.000492984	1	9.33545e-05	0.59375	0.617027
Q14103-3;Q14103;Q14103-4;Q14103-2	Heterogeneous nuclear ribonucleoprotein D0	HNRNPD		+	+	21.9495	22.1555	23.7954												Nervous system disease	Central Nervous system neoplasm		Astrocytoma																	nucleus	1.23223	0.23822	1223	0.515625	0.779194	0.859375	0.00329217	0.78125	0.0523302
Q14108;Q14108-2	Lysosome membrane protein 2	SCARB2			+	20.8723	23.9295	20.8468	+	+		+		+						Nervous system disease	Central Nervous system neoplasm	epilepsy	Astrocytoma											plasma membrane	Golgi	endoplasmic reticulum		Organelli	cytoplasm		3.72574	0.87082	603	0.890625	0.00245453	0.5625	0.967453	0.921875	0.00153384
Q14112;Q14112-2	Nidogen-2	NID2	+	+	+	27.3335	23.1964	31.3689	+	+	+			+						Nervous system disease	Central Nervous system neoplasm	epilepsy	Astrocytoma	Medulloblastoma										plasma membrane							5.58174	1.2578	335	0.84375	0.0033669	1	4.30914e-06	1	4.6939e-06
Q14118	Dystroglycan;Alpha-dystroglycan;Beta-dystroglycan	DAG1	+	+	+	29.1671	25.6723	22.7359	+	+	+			+						Nervous system disease	Central Nervous system neoplasm		Astrocytoma	Medulloblastoma	Synapse							S72.001		plasma membrane	Golgi	endoplasmic reticulum		Organelli	cytoplasm		6.7855	1.503	222	0.921875	0.000738262	1	1.82259e-06	0.84375	0.0210379
Q14126	Desmoglein-2	DSG2	+			23.4926	20.388	21.6639	+	+		+		+						Nervous system disease	Central Nervous system neoplasm		Astrocytoma	Medulloblastoma										plasma membrane							3.16735	0.73052	725	0.875	0.000892178	0.765625	0.0314739	0.84375	0.00774394
Q14194-2;Q14194	Dihydropyrimidinase-related protein 1	CRMP1			+	21.3621	22.5963	21.4532												Nervous system disease	Central Nervous system neoplasm	epilepsy	Astrocytoma	Medulloblastoma								M38.974									1.70612	0.35981	1077	0.734375	0.0423672	0.5625	0.85494	0.71875	0.0927831
Q14195-2;Q14195;Q14117	Dihydropyrimidinase-related protein 3	DPYSL3	+	+	+	21.8313	25.3914	23.8449	+	+				+						Nervous system disease	Central Nervous system neoplasm	epilepsy	Astrocytoma	Medulloblastoma								M38.973;M38.976									2.0994	0.47558	948	0.90625	0.00619073	0.796875	0.0397002	0.671875	0.215246
Q14203-3;Q14203-4;Q14203-6;Q14203;Q14203-5;Q14203-2	Dynactin subunit 1	DCTN1			+	21.4346	22.9371	21.4195												Nervous system disease	Central Nervous system neoplasm		Astrocytoma	Medulloblastoma															cytoplasm		0.835793	0.15321	1349	0.78125	0.0395737	0.5	0.968528	0.78125	0.0408337
Q14204	Cytoplasmic dynein 1 heavy chain 1	DYNC1H1		+	+	21.178	26.6961	25.3652	+	+	+			+						Nervous system disease	Central Nervous system neoplasm	epilepsy																	cytoplasm		7.26638	1.6072	182	1	2.66681e-06	1	2.34602e-05	0.75	0.124987
Q14240;Q14240-2	Eukaryotic initiation factor 4A-II;Eukaryotic initiation factor 4A-II, N-terminally processed	EIF4A2			+	21.2788	21.8151	20.9619												Nervous system disease																			cytoplasm		0.433313	0.070283	1496	0.6875	0.325447	0.625	0.533535	0.671875	0.179202
Q14254	Flotillin-2	FLOT2		+	+	21.1363	27.6148	24.278	+	+	+	+	+	+	+					Nervous system disease	Central Nervous system neoplasm				Synapse									plasma membrane					cytoplasm		10.4665	2.3013	51	1	2.33036e-07	0.875	0.00416312	0.898438	0.00457808
Q14314	Fibroleukin	FGL2		+	+	21.3268	23.5202	27.4897												Nervous system disease	Central Nervous system neoplasm		Astrocytoma																		3.93418	0.90889	562	0.78125	0.0271217	1	2.27086e-08	0.96875	0.000656622
Q14344;Q14344-2	Guanine nucleotide-binding protein subunit alpha-13	GNA13		+	+	21.4853	27.4777	24.7739	+	+	+			+						Nervous system disease	Central Nervous system neoplasm			Medulloblastoma										plasma membrane					cytoplasm	nucleus	7.57423	1.658	164	1	1.56145e-09	0.875	0.00224527	0.9375	0.00667025
Q14376;Q14376-2	UDP-glucose 4-epimerase	GALE	+			24.9702	20.5773	21.2354	+	+	+			+						Nervous system disease	Central Nervous system neoplasm		Astrocytoma																		5.93921	1.3103	302	1	5.16118e-07	1	9.99535e-06	0.703125	0.0810211
Q14393-3;Q14393;Q14393-1;Q14393-5;Q14393-4	Growth arrest-specific protein 6	GAS6	+	+	+	24.228	23.7349	23.1154												Nervous system disease	Central Nervous system neoplasm	epilepsy	Astrocytoma												Golgi	endoplasmic reticulum		Organelli	cytoplasm		0.136983	0.017234	1593	0.671875	0.718933	0.75	0.408455	0.59375	0.71123
Q14515;Q14515-2	SPARC-like protein 1	SPARCL1	+	+	+	30.5068	30.814	26.8829												Nervous system disease	Central Nervous system neoplasm	epilepsy	Astrocytoma		Synapse											endoplasmic reticulum		Organelli			2.25841	0.52725	908	0.671875	0.827522	0.78125	0.0184267	0.804688	0.0596508
Q14520-2;Q14520	Hyaluronan-binding protein 2;Hyaluronan-binding protein 2 50 kDa heavy chain;Hyaluronan-binding protein 2 50 kDa heavy chain alternate form;Hyaluronan-binding protein 2 27 kDa light chain;Hyaluronan-binding protein 2 27 kDa light chain alternate form	HABP2	+	+	+	24.7521	22.2443	24.4528	+	+				+						Nervous system disease												S01.033									5.59811	1.2626	332	0.828125	0.0239737	0.578125	0.733221	0.796875	0.0159227
Q14571;Q14571-2	Inositol 1,4,5-trisphosphate receptor type 2	ITPR2		+	+	21.2719	30.3375	30.8534	+	+	+			+						Nervous system disease	Central Nervous system neoplasm	epilepsy	Astrocytoma		Synapse	Synaptosome		Cholinergic synapse	Serotonergic synapse	Glutamatergic synapse				plasma membrane		endoplasmic reticulum		Organelli			4.73561	1.0731	446	1	2.27768e-06	1	1.87501e-07	0.546875	0.725763
Q14590-2;Q14590	Zinc finger protein 235	ZNF235	+			25.7732	20.5515	21.354	+	+	+			+																										nucleus	5.48951	1.2376	348	1	2.56448e-05	1	7.2615e-05	0.765625	0.129269
Q14624	Inter-alpha-trypsin inhibitor heavy chain H4;70 kDa inter-alpha-trypsin inhibitor heavy chain H4;35 kDa inter-alpha-trypsin inhibitor heavy chain H4	ITIH4	+	+	+	31.6973	29.155	29.8075												Nervous system disease	Central Nervous system neoplasm	epilepsy	Astrocytoma											plasma membrane							1.95925	0.43964	982	0.765625	0.0113863	0.9375	0.000525625	0.640625	0.487275
Q14697;Q14697-2	Neutral alpha-glucosidase AB	GANAB	+	+	+	22.5829	25.3133	26.5757	+	+	+			+																					Golgi	endoplasmic reticulum		Organelli			4.60301	1.0309	471	0.9375	0.000538941	0.984375	0.0001579	0.734375	0.0975852
Q14699	Raftlin	RFTN1		+	+	21.704	25.6614	24.2136	+	+				+						Nervous system disease		epilepsy												plasma membrane					cytoplasm		3.16943	0.73124	723	0.96875	0.000449713	0.765625	0.0345926	0.671875	0.260781
Q14761	Protein tyrosine phosphatase receptor type C-associated protein	PTPRCAP			+	22.1431	21.6137	21.6277																										plasma membrane							0.826201	0.15047	1353	0.671875	0.246214	0.796875	0.220459	0.578125	0.979056
Q14764	Major vault protein	MVP		+	+	21.2315	23.4205	24.2771	+	+	+			+						Nervous system disease	Central Nervous system neoplasm	epilepsy	Astrocytoma	Medulloblastoma															cytoplasm	nucleus	2.04977	0.46454	959	0.890625	0.00487496	0.859375	0.00470989	0.71875	0.309908
Q14766-3;Q14766-2;Q14766;Q14766-5;Q14766-4	Latent-transforming growth factor beta-binding protein 1	LTBP1	+	+	+	23.8799	23.4123	25.586												Nervous system disease	Central Nervous system neoplasm															endoplasmic reticulum		Organelli			0.856922	0.16045	1341	0.640625	0.589224	0.859375	0.0384268	0.78125	0.0539082
Q14767	Latent-transforming growth factor beta-binding protein 2	LTBP2	+		+	21.8445	22.7175	21.4279												Nervous system disease	Central Nervous system neoplasm	epilepsy																			3.64388	0.85671	620	0.640625	0.478624	0.515625	0.633309	0.65625	0.217155
Q14847-2;Q14847;Q14847-3	LIM and SH3 domain protein 1	LASP1			+	21.515	22.6085	21.7109												Nervous system disease	Central Nervous system neoplasm	epilepsy	Astrocytoma	Medulloblastoma															cytoplasm		0.345934	0.054817	1526	0.8125	0.0666698	0.5625	0.784814	0.65625	0.22285
Q14956-2;Q14956	Transmembrane glycoprotein NMB	GPNMB	+	+	+	26.2698	24.6308	26.7489												Nervous system disease	Central Nervous system neoplasm	epilepsy	Astrocytoma											plasma membrane							0.562575	0.090617	1451	0.6875	0.178141	0.53125	0.665299	0.703125	0.119749
Q14974;Q14974-2	Importin subunit beta-1	KPNB1		+	+	21.4128	26.4323	24.5876	+	+	+			+						Nervous system disease	Central Nervous system neoplasm		Astrocytoma													endoplasmic reticulum		Organelli	cytoplasm	nucleus	7.19335	1.6007	187	1	9.67351e-07	0.921875	0.000953061	0.6875	0.0638822
Q14980-3;Q14980-4;Q14980-2;Q14980;Q14980-5	Nuclear mitotic apparatus protein 1	NUMA1		+		21.2642	20.2586	24.1193	+			+		+						Nervous system disease	Central Nervous system neoplasm	epilepsy	Astrocytoma											plasma membrane					cytoplasm	nucleus	4.1745	0.95036	531	0.796875	0.0385344	0.953125	0.000161011	1	9.63982e-07
Q14982-2;Q14982;Q14982-4;Q14982-3	Opioid-binding protein/cell adhesion molecule	OPCML	+			26.7691	20.6535	20.8595	+	+	+			+						Nervous system disease	Central Nervous system neoplasm		Astrocytoma	Medulloblastoma										plasma membrane							8.98441	1.995	93	1	1.96156e-11	1	1.06542e-10	0.640625	0.63617
Q14CZ8;Q14CZ8-2	Hepatocyte cell adhesion molecule	HEPACAM			+	21.9839	22.6627	21.0179												Nervous system disease	Central Nervous system neoplasm			Medulloblastoma															cytoplasm		1.02081	0.19994	1282	0.65625	0.387416	0.75	0.0654363	0.765625	0.0529773
Q15005	Signal peptidase complex subunit 2	SPCS2			+	21.2365	21.4863	21.333																								X44.001				endoplasmic reticulum		Organelli			0.255395	0.035864	1560	0.5625	0.58519	0.515625	0.860656	0.53125	0.679076
Q15008;Q15008-4;Q15008-3;Q15008-2	26S proteasome non-ATPase regulatory subunit 6	PSMD6			+	21.6093	24.2488	21.8046	+	+		+		+						Nervous system disease																					2.35933	0.55155	885	0.90625	0.0036603	0.578125	0.725652	0.984375	0.00253125
Q15019;Q15019-3;Q15019-2	Septin-2	SEPT2			+	21.6374	23.8716	21.4268	+	+				+						Nervous system disease	Central Nervous system neoplasm		Astrocytoma	Medulloblastoma	Synapse									plasma membrane					cytoplasm	nucleus	1.63686	0.33931	1100	0.875	0.00520045	0.734375	0.716004	0.828125	0.00961003
Q15063-3	Periostin	POSTN	+	+	+	27.7741	24.0499	28.2684	+	+				+						Nervous system disease	Central Nervous system neoplasm		Astrocytoma												Golgi			Organelli			2.38248	0.55853	878	0.8125	0.0170092	0.53125	0.675429	0.84375	0.0101621
Q15075	Early endosome antigen 1	EEA1			+	21.7967	20.7535	21.2093												Nervous system disease	Central Nervous system neoplasm		Astrocytoma		Synapse									plasma membrane					cytoplasm		8.09335	1.7601	131	0.78125	0.232497	0.65625	0.237798	0.75	0.573929
Q15084-3;Q15084;Q15084-4;Q15084-5;Q15084-2	Protein disulfide-isomerase A6	PDIA6	+	+	+	23.2292	22.8619	23.6919												Nervous system disease	Central Nervous system neoplasm		Astrocytoma											plasma membrane	Golgi	endoplasmic reticulum		Organelli			1.26517	0.24774	1211	0.546875	0.669873	0.578125	0.644092	0.578125	0.40685
Q15102	Platelet-activating factor acetylhydrolase IB subunit gamma	PAFAH1B3	+		+	21.5818	25.2897	21.7802	+	+		+		+																									cytoplasm		2.03434	0.46113	962	0.84375	0.00963782	0.515625	0.752578	0.84375	0.0126827
Q15113	Procollagen C-endopeptidase enhancer 1	PCOLCE	+	+	+	27.9301	28.6975	31.3426												Nervous system disease		epilepsy																			1.44434	0.28641	1162	0.6875	0.561998	0.953125	0.00249387	0.78125	0.0593286
Q15121;Q15121-2	Astrocytic phosphoprotein PEA-15	PEA15	+	+	+	23.9068	23.6724	22.0197												Nervous system disease	Central Nervous system neoplasm	epilepsy	Astrocytoma																		1.62202	0.33282	1107	0.59375	0.848341	0.875	0.0442129	0.625	0.260644
Q15149-7;Q15149-8;Q15149-9;Q15149-5;Q15149-4;Q15149-6;Q15149-3;Q15149-2;Q15149	Plectin	PLEC	+			22.2658	20.1979	21.105	+	+				+						Nervous system disease	Central Nervous system neoplasm	epilepsy	Astrocytoma	Medulloblastoma										plasma membrane					cytoplasm		6.59666	1.4657	236	0.890625	0.0112226	0.671875	0.21416	0.796875	0.139143
Q15181	Inorganic pyrophosphatase	PPA1		+	+	21.6883	25.1724	23.0204	+	+				+						Nervous system disease																			cytoplasm		2.25881	0.52774	907	0.953125	0.00146156	0.703125	0.162525	0.78125	0.0441658
Q15185-4;Q15185;Q15185-3;Q15185-2	Prostaglandin E synthase 3	PTGES3		+	+	20.8609	24.2836	23.1028	+	+				+						Nervous system disease	Central Nervous system neoplasm																			nucleus	2.36987	0.55454	882	0.875	0.00510664	0.75	0.060669	0.65625	0.423413
Q15223-3;Q15223-2;Q15223	Nectin-1	PVRL1	+			26.4326	20.4525	21.3634	+	+	+			+						Nervous system disease	Central Nervous system neoplasm	epilepsy	Astrocytoma	Medulloblastoma	Synapse						CD111			plasma membrane							7.65656	1.6716	160	1	7.31233e-09	1	2.05201e-08	0.796875	0.0285063
Q15256;Q15256-5	Receptor-type tyrosine-protein phosphatase R	PTPRR	+			23.3693	20.8296	20.5542	+	+	+			+						Nervous system disease	Central Nervous system neoplasm		Astrocytoma	Medulloblastoma										plasma membrane					cytoplasm		3.04427	0.6992	750	0.875	0.00267105	0.859375	0.00432426	0.617188	0.63178
Q15286	Ras-related protein Rab-35	RAB35		+	+	21.0811	23.8909	24.4575	+	+	+			+						Nervous system disease					Synapse									plasma membrane							5.61559	1.2718	328	0.921875	0.00103525	0.953125	2.59669e-05	0.65625	0.40436
Q15363	Transmembrane emp24 domain-containing protein 2	TMED2			+	21.5992	22.4346	21.686	+	+				+																					Golgi	endoplasmic reticulum		Organelli			0.407531	0.064494	1507	0.84375	0.0143678	0.554688	0.817798	0.78125	0.0437889
Q15365;P57721-2;P57721-3;P57721-5;P57721-4;P57721;P57723-2;P57723	Poly(rC)-binding protein 1	PCBP1			+	21.4516	23.1466	21.5968	+	+		+		+						Nervous system disease	Central Nervous system neoplasm																		cytoplasm	nucleus	1.12821	0.21852	1253	0.820312	0.0127359	0.5625	0.803852	0.859375	0.00686926
Q15366-7;Q15366-8;Q15366-4;Q15366-5;Q15366-6;Q15366-3;Q15366;Q15366-2	Poly(rC)-binding protein 2	PCBP2			+	21.6542	21.9921	21.3964												Nervous system disease	Central Nervous system neoplasm		Astrocytoma		Synapse														cytoplasm	nucleus	0.263755	0.03912	1555	0.617188	0.560791	0.546875	0.708562	0.59375	0.422098
Q15369-2;Q15369	Transcription elongation factor B polypeptide 1	TCEB1		+	+	21.4902	21.7974	23.0406												Nervous system disease	Central Nervous system neoplasm		Astrocytoma																		1.09684	0.21557	1258	0.546875	0.704048	0.765625	0.0843339	0.734375	0.215739
Q15404;Q15404-2	Ras suppressor protein 1	RSU1	+	+	+	22.3595	24.9618	24.0344												Nervous system disease	Central Nervous system neoplasm		Astrocytoma																		0.490918	0.079492	1478	0.703125	0.133444	0.617188	0.203137	0.53125	0.625149
Q15431	Synaptonemal complex protein 1	SYCP1	+	+	+	23.6323	21.9677	25.46	+			+		+						Nervous system disease	Central Nervous system neoplasm		Astrocytoma																	nucleus	2.62759	0.61541	826	0.75	0.0910346	0.78125	0.0728459	0.890625	0.00551334
Q15435;Q15435-3;Q15435-2;Q15435-5;Q15435-4	Protein phosphatase 1 regulatory subunit 7	PPP1R7	+	+	+	22.1897	24.0253	21.8955													Central Nervous system neoplasm		Astrocytoma																cytoplasm	nucleus	1.56046	0.31704	1126	0.75	0.0917597	0.578125	0.710611	0.78125	0.04119
Q15485;Q15485-2	Ficolin-2	FCN2		+	+	21.3748	23.9378	28.1742	+			+		+						Nervous system disease		epilepsy												plasma membrane							4.38958	0.99768	498	0.71875	0.0582239	1	8.07499e-07	0.859375	0.00817886
Q15555-4;Q15555-5;Q15555-3;Q15555;Q15555-2	Microtubule-associated protein RP/EB family member 2	MAPRE2			+	21.1009	22.855	21.4667	+	+				+						Nervous system disease		epilepsy																	cytoplasm		1.81582	0.38811	1037	0.828125	0.0145929	0.546875	0.57212	0.796875	0.033403
Q15582	Transforming growth factor-beta-induced protein ig-h3	TGFBI	+	+	+	30.4497	29.987	32.1965	+			+		+						Nervous system disease	Central Nervous system neoplasm		Astrocytoma											plasma membrane	Golgi			Organelli			3.61624	0.85398	624	0.65625	0.279842	0.96875	6.11747e-05	0.96875	4.74303e-05
Q15599;Q15599-3;Q15599-2	Na(+)/H(+) exchange regulatory cofactor NHE-RF2	SLC9A3R2			+	21.145	23.018	21.1776	+	+				+						Nervous system disease	Central Nervous system neoplasm													plasma membrane						nucleus	1.73512	0.36414	1065	0.875	0.0102211	0.5625	0.93438	0.953125	0.00725455
Q15631;Q15631-2	Translin	TSN			+	21.463	24.1653	21.1847												Nervous system disease	Central Nervous system neoplasm		Astrocytoma													endoplasmic reticulum		Organelli	cytoplasm	nucleus	1.73609	0.36503	1064	0.78125	0.0158343	0.59375	0.702183	0.859375	0.0104438
Q15691	Microtubule-associated protein RP/EB family member 1	MAPRE1	+	+	+	22.4017	23.7473	21.5103												Nervous system disease	Central Nervous system neoplasm		Astrocytoma	Medulloblastoma											Golgi			Organelli	cytoplasm		1.56196	0.3171	1125	0.75	0.125682	0.640625	0.313898	0.859375	0.0103932
Q15782;Q15782-6;Q15782-5	Chitinase-3-like protein 2	CHI3L2	+	+	+	27.9509	23.5974	23.9504	+	+	+			+						Nervous system disease	Central Nervous system neoplasm		Astrocytoma																		5.02059	1.1238	407	0.921875	0.000208355	0.9375	0.000547201	0.578125	0.656794
Q15818	Neuronal pentraxin-1	NPTX1	+		+	25.78	21.8732	21.0345	+	+	+			+						Nervous system disease	Central Nervous system neoplasm		Astrocytoma		Synapse									plasma membrane			mitochondrion	Organelli			4.79692	1.0759	443	0.9375	0.000386516	1	4.54038e-05	0.640625	0.185825
Q15833-2;Q15833;Q15833-3	Syntaxin-binding protein 2	STXBP2		+	+	21.7212	23.2446	23.0993	+	+				+						Nervous system disease	Central Nervous system neoplasm	epilepsy	Astrocytoma		Synapse	Synaptosome								plasma membrane							3.07067	0.70968	741	0.875	0.0128566	0.78125	0.0727256	0.546875	0.836664
Q15846	Clusterin-like protein 1	CLUL1			+	22.0385	21.2718	21.0089												Nervous system disease																					8.21946	1.7795	125	0.671875	0.197312	0.703125	0.0955895	0.625	0.428678
Q15848	Adiponectin	ADIPOQ	+	+		24.4735	20.6979	22.0392	+	+				+						Nervous system disease		epilepsy			Synapse											endoplasmic reticulum		Organelli			2.87741	0.66362	780	1	2.96491e-05	0.765625	0.027427	0.625	0.150848
Q15904	V-type proton ATPase subunit S1	ATP6AP1	+	+	+	28.204	25.1024	25.0126	+	+	+			+						Nervous system disease	Central Nervous system neoplasm	epilepsy	Astrocytoma												Golgi	endoplasmic reticulum		Organelli			3.60988	0.84786	628	0.9375	0.00062698	1	3.56392e-05	0.515625	0.905899
Q15907;P62491-2;Q15907-2;P62491;P57735	Ras-related protein Rab-11B;Ras-related protein Rab-11A	RAB11B;RAB11A		+	+	21.446	27.4162	26.1315	+	+	+			+						Nervous system disease	Central Nervous system neoplasm		Astrocytoma		Synapse									plasma membrane	Golgi			Organelli	cytoplasm		6.74844	1.4968	226	1	8.03574e-08	1	1.18819e-07	0.84375	0.0130563
Q16181-2;Q16181	Septin-7	SEPT7		+	+	21.4006	24.0274	22.6039	+	+				+						Nervous system disease	Central Nervous system neoplasm		Astrocytoma																	nucleus	1.72667	0.36383	1067	0.890625	0.00575092	0.765625	0.120444	0.78125	0.04144
Q16270;Q16270-2	Insulin-like growth factor-binding protein 7	IGFBP7	+	+	+	31.5077	26.6701	30.6623	+	+				+						Nervous system disease	Central Nervous system neoplasm	epilepsy	Astrocytoma													endoplasmic reticulum		Organelli			1.31915	0.26131	1195	0.9375	0.00742887	0.664062	0.293525	0.875	0.0240279
Q16363-2;Q16363	Laminin subunit alpha-4	LAMA4	+	+		20.9717	20.9233	27.7726	+			+		+						Nervous system disease	Central Nervous system neoplasm		Astrocytoma		Synapse																7.98781	1.7341	141	0.53125	0.910269	1	4.00389e-06	1	1.98202e-06
Q16401;Q16401-2	26S proteasome non-ATPase regulatory subunit 5	PSMD5		+	+	21.4061	22.9649	23.0155												Nervous system disease	Central Nervous system neoplasm																				0.698843	0.11942	1400	0.71875	0.08249	0.75	0.0893717	0.515625	0.964313
Q16555;Q16555-2	Dihydropyrimidinase-related protein 2	DPYSL2	+	+	+	24.5307	29.3431	27.3582	+	+	+			+						Nervous system disease	Central Nervous system neoplasm	epilepsy	Astrocytoma		Synapse							M38.975		plasma membrane							2.37388	0.55514	881	0.96875	0.000219225	0.859375	0.0182262	0.765625	0.0560323
Q16581	C3a anaphylatoxin chemotactic receptor	C3AR1			+	21.1862	21.576	20.8473												Nervous system disease	Central Nervous system neoplasm	epilepsy	Astrocytoma	Medulloblastoma										plasma membrane							0.408151	0.065816	1506	0.703125	0.21586	0.703125	0.484842	0.75	0.119803
Q16594	Transcription initiation factor TFIID subunit 9	TAF9	+	+		26.3902	21.2586	27.2304	+	+		+		+																										nucleus	8.66313	1.9354	105	1	2.44501e-08	0.8125	0.0739704	1	3.57171e-08
Q16610;Q16610-4;Q16610-2;Q16610-3	Extracellular matrix protein 1	ECM1	+	+	+	27.4539	23.511	28.6027	+	+				+						Nervous system disease	Central Nervous system neoplasm		Astrocytoma																		3.45827	0.79978	662	0.875	0.00214283	0.851562	0.0311023	0.90625	0.000332123
Q16627;Q16627-2	C-C motif chemokine 14;HCC-1(3-74);HCC-1(4-74);HCC-1(9-74)	CCL14	+			25.0632	20.6509	21.2787	+	+	+			+						Nervous system disease																					6.81071	1.513	219	1	1.56567e-06	0.96875	3.32738e-05	0.65625	0.262548
Q16643;Q16643-3;Q16643-2	Drebrin	DBN1	+		+	22.0279	22.7367	21.6432												Nervous system disease	Central Nervous system neoplasm	epilepsy	Astrocytoma		Synapse														cytoplasm		0.575145	0.094078	1447	0.578125	0.388236	0.578125	0.573601	0.734375	0.103644
Q16653;Q16653-13;Q16653-9;Q16653-8;Q16653-11;Q16653-2;Q16653-6;Q16653-3;Q16653-7;Q16653-5;Q16653-10;Q16653-4;Q16653-12	Myelin-oligodendrocyte glycoprotein	MOG	+		+	23.0564	21.7842	20.9291												Nervous system disease	Central Nervous system neoplasm	epilepsy	Astrocytoma	Medulloblastoma										plasma membrane							1.23504	0.23835	1222	0.734375	0.148295	0.84375	0.00828932	0.625	0.22304
Q16658	Fascin	FSCN1	+	+	+	24.7577	25.4628	26.2448												Nervous system disease	Central Nervous system neoplasm		Astrocytoma	Medulloblastoma															cytoplasm		0.449183	0.072308	1491	0.671875	0.240134	0.84375	0.00757946	0.640625	0.245737
Q16706	Alpha-mannosidase 2	MAN2A1	+	+	+	25.3636	21.373	21.9104	+	+	+			+						Nervous system disease	Central Nervous system neoplasm		Astrocytoma												Golgi			Organelli			2.96174	0.67929	768	0.984375	3.6815e-06	0.9375	0.00128017	0.53125	0.560071
Q16720-5;Q16720-6;Q16720-2;Q16720-3;Q16720-7;Q16720;Q16720-8;Q16720-4	Plasma membrane calcium-transporting ATPase 3	ATP2B3		+	+	21.3897	27.6636	26.5147	+	+	+			+						Nervous system disease	Central Nervous system neoplasm		Astrocytoma		Synapse									plasma membrane							6.22777	1.3667	270	1	1.60675e-06	0.984375	7.61925e-05	0.671875	0.303229
Q16769;Q16769-2	Glutaminyl-peptide cyclotransferase	QPCT	+		+	26.2547	21.0107	21.4632	+	+	+			+						Nervous system disease	Central Nervous system neoplasm	epilepsy	Astrocytoma									M28.974									9.03488	1.9974	91	1	2.42551e-07	1	2.12224e-07	0.640625	0.487198
Q16775;Q16775-2;Q16775-3	Hydroxyacylglutathione hydrolase, mitochondrial	HAGH	+	+	+	21.8623	23.2091	22.3182												Nervous system disease																	mitochondrion	Organelli	cytoplasm		0.648701	0.10306	1424	0.609375	0.235545	0.515625	0.64787	0.59375	0.499572
Q16799;Q16799-2	Reticulon-1	RTN1	+		+	21.9445	22.571	21.1695												Nervous system disease	Central Nervous system neoplasm		Astrocytoma												Golgi	endoplasmic reticulum		Organelli			0.697379	0.11898	1401	0.59375	0.412872	0.679688	0.169591	0.765625	0.0675913
Q16849;Q16849-3;Q16849-2	Receptor-type tyrosine-protein phosphatase-like N	PTPRN	+		+	26.5734	22.805	21.1507	+	+	+			+						Nervous system disease	Central Nervous system neoplasm		Astrocytoma											plasma membrane						nucleus	4.87724	1.0933	431	0.984375	0.000352898	1	5.16236e-11	0.6875	0.050394
Q16851;Q16851-2	UTP--glucose-1-phosphate uridylyltransferase	UGP2	+	+	+	23.4174	25.4595	24.5107	+	+				+						Nervous system disease	Central Nervous system neoplasm	epilepsy	Astrocytoma																cytoplasm	nucleus	2.40515	0.55854	877	0.984375	0.0022767	0.835938	0.208125	0.609375	0.226403
Q16881-4;Q16881-3;Q16881;Q16881-5;Q16881-2;Q16881-6;Q16881-7	Thioredoxin reductase 1, cytoplasmic	TXNRD1	+		+	23.1234	22.0585	21.1398												Nervous system disease	Central Nervous system neoplasm	epilepsy	Astrocytoma														mitochondrion	Organelli	cytoplasm		0.902448	0.17148	1326	0.640625	0.197713	0.84375	0.0287025	0.734375	0.0997482
Q1MSJ5;Q1MSJ5-1;Q1MSJ5-2	Centrosome and spindle pole-associated protein 1	CSPP1		+	+	21.3096	22.4754	22.4382												Nervous system disease																			cytoplasm		0.537129	0.088271	1459	0.734375	0.110339	0.59375	0.259472	0.5625	0.972317
Q24JP5;Q24JP5-2;Q24JP5-4;Q24JP5-3	Transmembrane protein 132A	TMEM132A	+			27.0834	20.4207	21.2397	+	+	+			+						Nervous system disease					Synapse									plasma membrane	Golgi	endoplasmic reticulum		Organelli			8.70539	1.9382	104	1	3.86584e-10	1	1.82983e-09	0.734375	0.0843098
Q30154	HLA class II histocompatibility antigen, DR beta 5 chain	HLA-DRB5		+	+	20.9229	25.3569	23.3161	+	+				+						Nervous system disease														plasma membrane	Golgi	endoplasmic reticulum		Organelli			2.71845	0.63283	813	0.851562	0.00138605	0.765625	0.0375047	0.734375	0.176461
Q3SXY8;Q3SXY8-3;Q3SXY8-2	ADP-ribosylation factor-like protein 13B	ARL13B		+	+	21.6402	23.5837	24.0494	+	+	+			+						Nervous system disease	Central Nervous system neoplasm		Astrocytoma																		2.67001	0.6202	821	0.859375	0.0081851	0.765625	0.0173993	0.59375	0.649551
Q495W5;Q495W5-2	Alpha-(1,3)-fucosyltransferase 11	FUT11	+			22.7515	20.8197	21.13	+	+	+			+						Nervous system disease															Golgi			Organelli			1.15353	0.22327	1245	0.875	0.000544871	0.859375	0.00978116	0.546875	0.395218
Q4KMQ2-3;Q4KMQ2;Q4KMQ2-2;Q4KMQ2-4	Anoctamin-6	ANO6		+	+	21.1425	25.3762	22.906	+	+		+		+						Nervous system disease	Central Nervous system neoplasm		Astrocytoma											plasma membrane							3.11647	0.71696	734	1	2.45139e-06	0.78125	0.0294618	0.890625	0.00564499
Q4KWH8-3;Q4KWH8-4;Q4KWH8-2;Q4KWH8	1-phosphatidylinositol 4,5-bisphosphate phosphodiesterase eta-1	PLCH1	+			25.2315	21.1628	21.3316	+	+	+			+						Nervous system disease	Central Nervous system neoplasm		Astrocytoma											plasma membrane					cytoplasm		4.66313	1.0482	460	1	1.07976e-06	1	5.04302e-06	0.585938	0.702468
Q4LDE5;Q4LDE5-4;Q4LDE5-2;Q4LDE5-3	Sushi, von Willebrand factor type A, EGF and pentraxin domain-containing protein 1	SVEP1		+		21.315	21.3381	24.7917	+			+		+						Nervous system disease																			cytoplasm	nucleus	6.13034	1.3518	280	0.5625	0.963959	0.96875	7.21901e-05	0.984375	1.30193e-05
Q4V328-4;Q4V328	GRIP1-associated protein 1	GRIPAP1	+	+	+	23.2912	28.0429	26.691	+	+				+						Nervous system disease					Synapse																1.4775	0.2912	1155	0.921875	0.00194878	0.78125	0.0435944	0.625	0.40711
Q4ZHG4;Q4ZHG4-2	Fibronectin type III domain-containing protein 1	FNDC1	+	+		23.4073	20.8645	22.7211	+	+				+						Nervous system disease																					1.38613	0.27593	1179	0.9375	0.00043806	0.609375	0.582903	0.609375	0.149648
Q504Y0-4;Q504Y0;Q504Y0-3;Q504Y0-5;Q504Y0-2	Zinc transporter ZIP12	SLC39A12	+	+	+	23.7345	27.7526	27.09	+	+	+			+						Nervous system disease	Central Nervous system neoplasm		Astrocytoma	Medulloblastoma										plasma membrane					cytoplasm		3.66636	0.85927	616	0.9375	0.00195178	0.796875	0.0143209	0.59375	0.604029
Q53EL9-3;Q53EL9;Q53EL9-2;Q53EL9-4	Seizure protein 6 homolog	SEZ6	+		+	26.9379	22.3064	21.7318	+	+	+			+						Nervous system disease	Central Nervous system neoplasm	epilepsy	Astrocytoma		Synapse									plasma membrane		endoplasmic reticulum		Organelli	cytoplasm		4.8086	1.0798	441	0.96875	0.000175862	1	6.45057e-06	0.578125	0.474246
Q53TN4-3;Q53TN4	Cytochrome b reductase 1	CYBRD1		+	+	21.0669	23.4525	22.0769	+	+				+						Nervous system disease														plasma membrane							1.14642	0.22234	1247	0.96875	0.00146449	0.75	0.0817443	0.71875	0.0796626
Q58FF8	Putative heat shock protein HSP 90-beta 2	HSP90AB2P		+	+	21.3207	25.7447	24.8038	+	+	+			+																				plasma membrane					cytoplasm		3.48421	0.80449	655	1	9.97898e-05	0.90625	0.00141878	0.5625	0.365131
Q5BIV9	Shadow of prion protein	SPRN		+	+	21.4594	21.4265	23.4179	+			+		+						Nervous system disease														plasma membrane						nucleus	1.49421	0.2969	1147	0.539062	0.966189	0.765625	0.0210319	0.828125	0.0118854
Q5BLP8;Q5BLP8-3;Q5BLP8-2	Neuropeptide-like protein C4orf48	C4orf48		+		23.1976	20.4205	23.054	+	+				+								epilepsy																			1.50981	0.30012	1141	0.859375	0.0274141	0.578125	0.909129	0.890625	0.00111196
Q5FWE3-3;Q5FWE3	Proline-rich transmembrane protein 3	PRRT3	+			25.0657	20.6732	21.7418	+	+	+			+						Nervous system disease	Central Nervous system neoplasm		Astrocytoma	Medulloblastoma																	4.90127	1.0997	427	1	1.69704e-06	0.9375	0.000271012	0.765625	0.061745
Q5FWF5;Q5FWF5-2	N-acetyltransferase ESCO1	ESCO1	+			25.426	20.5418	21.6243	+	+	+	+	+	+	+					Nervous system disease	Central Nervous system neoplasm		Astrocytoma																	nucleus	13.1691	2.7582	13	1	5.21535e-09	1	7.2785e-07	0.8125	0.00961402
Q5IJ48-3;Q5IJ48;Q5IJ48-2	Protein crumbs homolog 2	CRB2		+	+	20.7604	24.3096	23.5045	+	+	+			+																				plasma membrane					cytoplasm		3.88558	0.89604	576	1	0.000178039	0.96875	0.00147116	0.625	0.343263
Q5KU26	Collectin-12	COLEC12	+	+	+	24.3526	23.1019	24.6274												Nervous system disease	Central Nervous system neoplasm	epilepsy	Astrocytoma											plasma membrane							0.539147	0.088836	1457	0.765625	0.141801	0.515625	0.772426	0.75	0.0992012
Q5T5S1-2;Q5T5S1	Coiled-coil domain-containing protein 183	CCDC183	+			25.3727	20.4895	21.1497	+	+	+			+																											6.42657	1.421	253	0.984375	1.25964e-05	0.984375	2.19939e-05	0.65625	0.316518
Q5T749	Keratinocyte proline-rich protein	KPRP		+		21.5239	20.7649	24.9081	+			+		+																									cytoplasm		4.10192	0.94141	541	0.640625	0.133765	0.9375	0.00043349	1	0.000110562
Q5TGI0	Failed axon connections homolog	FAXC				22.1521	20.7463	21.2415													Central Nervous system neoplasm		Astrocytoma																cytoplasm		5.18954	1.1789	379	0.796875	0.0190599	0.71875	0.193233	0.65625	0.313919
Q5TZA2-2;Q5TZA2	Rootletin	CROCC		+	+	21.2676	22.6854	23.4795	+	+	+			+																				plasma membrane							1.77529	0.37649	1051	0.828125	0.0134932	0.796875	0.0121373	0.65625	0.346701
Q5VYK3	Proteasome-associated protein ECM29 homolog	ECM29				20.7153	20.7698	20.9063																											Golgi	endoplasmic reticulum		Organelli	cytoplasm	nucleus	6.04669	1.3385	285	0.578125	0.899217	0.625	0.672008	0.578125	0.643676
Q5ZPR3-3;Q5ZPR3-4;Q5ZPR3;Q5ZPR3-2	CD276 antigen	CD276			+	20.9099	23.8675	21.4425	+	+		+		+						Nervous system disease	Central Nervous system neoplasm		Astrocytoma	Medulloblastoma							CD276			plasma membrane							2.21277	0.51204	918	0.9375	0.00213089	0.640625	0.325457	0.90625	0.00613908
Q641Q3;Q641Q3-2	Meteorin-like protein	METRNL		+		21.5056	20.4896	22.0074																																	4.59014	1.0247	474	0.78125	0.0767733	0.5625	0.545905	0.703125	0.0593302
Q658P3-3;Q658P3;Q658P3-2;Q658P3-4	Metalloreductase STEAP3	STEAP3			+	22.0025	23.3743	21.2163	+	+		+		+						Nervous system disease	Central Nervous system neoplasm		Astrocytoma											plasma membrane					cytoplasm		1.63042	0.33612	1104	0.875	0.00367368	0.765625	0.0991417	0.953125	0.00018819
Q6B0K9	Hemoglobin subunit mu	HBM		+	+	21.3269	25.9773	26.9805	+	+	+			+						Nervous system disease	Central Nervous system neoplasm																				2.4783	0.58056	861	0.8125	0.0155686	0.9375	0.000750926	0.546875	0.629098
Q6EMK4	Vasorin	VASN	+			28.3391	20.4649	21.542	+	+	+			+						Nervous system disease	Central Nervous system neoplasm	epilepsy	Astrocytoma											plasma membrane			mitochondrion	Organelli			8.52162	1.8844	109	1	1.09241e-11	1	7.56243e-10	0.78125	0.0696395
Q6IAA8	Ragulator complex protein LAMTOR1	LAMTOR1			+	22.2681	22.7145	21.4119												Nervous system disease														plasma membrane							1.29412	0.26012	1199	0.65625	0.393206	0.84375	0.045284	0.765625	0.0392156
Q6IBS0;Q9NR96-4	Twinfilin-2	TWF2			+	22.1152	22.7762	20.8749	+			+		+						Nervous system disease	Central Nervous system neoplasm		Astrocytoma								CD289			plasma membrane	Golgi	endoplasmic reticulum		Organelli	cytoplasm		2.5406	0.59846	843	0.65625	0.212207	0.796875	0.0380096	0.890625	0.0073071
Q6NUJ2	Uncharacterized protein C11orf87	C11orf87	+			22.3975	20.5129	21.5337	+	+				+						Nervous system disease	Central Nervous system neoplasm		Astrocytoma	Medulloblastoma																	3.46283	0.80256	661	0.953125	0.000254095	0.78125	0.0456155	0.921875	0.00342103
Q6NW40	RGM domain family member B	RGMB	+			25.0532	20.706	20.78	+	+	+			+						Nervous system disease														plasma membrane	Golgi	endoplasmic reticulum		Organelli			7.0041	1.5674	198	1	2.41536e-06	1	1.204e-06	0.515625	0.861489
Q6P1M0-2			+	+	+	27.9413	24.2612	26.3403	+	+	+			+						Nervous system disease														plasma membrane		endoplasmic reticulum		Organelli			2.73656	0.63552	809	0.960938	0.000423677	0.875	0.0112157	0.8125	0.019333
Q6P387-2;Q6P387	Uncharacterized protein C16orf46	C16orf46	+	+	+	21.4598	23.4361	23.2063																																	2.43009	0.56614	870	0.8125	0.0329189	0.78125	0.0388687	0.53125	0.802103
Q6PCB0;Q6PCB0-2	von Willebrand factor A domain-containing protein 1	VWA1		+		22.0939	20.3874	27.5977	+	+	+	+	+	+	+				+																	endoplasmic reticulum		Organelli			11.8808	2.548	28	0.859375	0.0059611	1	1.02575e-06	1	1.32828e-09
Q6PJG2	ELM2 and SANT domain-containing protein 1	ELMSAN1		+		20.9056	20.3828	27.61												Nervous system disease																					7.00936	1.5675	197	0.671875	0.322984	1	5.64971e-06	1	1.4888e-06
Q6UVK1	Chondroitin sulfate proteoglycan 4	CSPG4	+		+	22.7105	21.2644	21.4042												Nervous system disease	Central Nervous system neoplasm		Astrocytoma											plasma membrane	Golgi			Organelli			2.53119	0.59117	846	0.648438	0.194785	0.671875	0.204678	0.625	0.840888
Q6UVM3-4;Q6UVM3-3;Q6UVM3-2;Q6UVM3	Potassium channel subfamily T member 2	KCNT2				21.3457	20.9227	22.4113	+			+		+						Nervous system disease		epilepsy												plasma membrane							3.90036	0.89939	570	0.5	0.421907	0.6875	0.0804773	0.859375	0.00379761
Q6UX71;Q6UX71-2	Plexin domain-containing protein 2	PLXDC2	+		+	28.0006	24.7323	22.1082	+	+	+			+						Nervous system disease	Central Nervous system neoplasm		Astrocytoma																		5.01749	1.1234	408	0.875	0.00057876	1	9.01891e-08	0.898438	0.0125164
Q6UX73-2;Q6UX73;REV__P20585	UPF0764 protein C16orf89	C16orf89	+	+	+	26.1	21.7533	22.7498	+	+	+			+						Nervous system disease	Central Nervous system neoplasm		Astrocytoma																		4.6833	1.0661	454	0.984375	3.08455e-05	0.9375	0.00424701	0.609375	0.41147
Q6UXB8;Q6UXB8-2	Peptidase inhibitor 16	PI16	+		+	27.6305	21.756	22.1623	+	+	+			+						Nervous system disease	Central Nervous system neoplasm										CD364										5.55713	1.253	338	1	4.19736e-07	1	7.1393e-08	0.546875	0.541628
Q6UXD5-3;Q6UXD5-5;Q6UXD5-2;Q6UXD5;Q6UXD5-6;Q6UXD5-4	Seizure 6-like protein 2	SEZ6L2	+			27.6679	20.7581	21.547	+	+	+			+			+			Nervous system disease	Central Nervous system neoplasm		Astrocytoma											plasma membrane		endoplasmic reticulum		Organelli			6.61999	1.4737	235	1	6.66206e-12	1	6.03635e-09	0.828125	0.0874689
Q6UXH9-2;Q6UXH9;Q6UXH9-3	Inactive serine protease PAMR1	PAMR1	+	+		21.7646	21.1938	25.6332	+			+		+						Nervous system disease												S01.998									4.55741	1.0206	478	0.6875	0.112733	0.90625	0.000953891	0.9375	0.0002269
Q6UXK2	Immunoglobulin superfamily containing leucine-rich repeat protein 2	ISLR2	+	+	+	25.3296	20.6465	21.0691	+	+	+			+						Nervous system disease														plasma membrane							3.11992	0.71742	733	0.976562	0.000349353	0.9375	0.00231601	0.640625	0.607925
Q6YHK3;Q6YHK3-4;Q6YHK3-2;Q6YHK3-3	CD109 antigen	CD109	+		+	26.0034	21.6431	21.631	+	+	+			+						Nervous system disease	Central Nervous system neoplasm	epilepsy	Astrocytoma								CD109	I39.006		plasma membrane							6.28592	1.3706	268	1	6.67276e-07	1	1.11262e-07	0.515625	0.983069
Q6ZUX7	Lipoma HMGIC fusion partner-like 2 protein	LHFPL2			+	21.733	22.975	21.4205	+	+		+		+						Nervous system disease	Central Nervous system neoplasm	epilepsy	Astrocytoma											plasma membrane							1.3592	0.26997	1184	0.8125	0.0252183	0.5625	0.516373	0.859375	0.0076517
Q6ZVL6-2;Q6ZVL6	UPF0606 protein KIAA1549L	KIAA1549L	+			22.398	20.8099	21.1012	+	+	+			+						Nervous system disease	Central Nervous system neoplasm		Astrocytoma	Medulloblastoma																	0.482534	0.079195	1480	0.84375	0.00538893	0.859375	0.0123466	0.59375	0.508101
Q71U36-2				+	+	21.6189	25.338	25.017	+	+	+			+						Nervous system disease	Central Nervous system neoplasm		Astrocytoma											plasma membrane					cytoplasm	nucleus	3.53759	0.82595	642	0.921875	0.000874803	0.8125	0.00955647	0.515625	0.801784
Q7L2H7;Q7L2H7-2	Eukaryotic translation initiation factor 3 subunit M	EIF3M			+	21.688	21.9225	21.366												Nervous system disease	Central Nervous system neoplasm		Astrocytoma																		0.421967	0.067221	1502	0.5625	0.650041	0.640625	0.435636	0.71875	0.252654
Q7L576;Q7L576-2;Q7L576-3	Cytoplasmic FMR1-interacting protein 1	CYFIP1		+	+	21.354	25.6042	25.3797	+	+	+			+						Nervous system disease	Central Nervous system neoplasm	epilepsy	Astrocytoma		Synapse														cytoplasm		6.36224	1.3983	259	0.984375	0.000143858	1	2.76288e-06	0.546875	0.771478
Q7L5N1	COP9 signalosome complex subunit 6	COPS6			+	20.8346	23.2201	21.2385	+	+				+						Nervous system disease	Central Nervous system neoplasm		Astrocytoma									M67.972							cytoplasm	nucleus	1.60361	0.32693	1114	0.828125	0.0229827	0.625	0.431227	0.796875	0.0460424
Q9H8S9;Q7L9L4;Q7L9L4-2;Q9H8S9-2	MOB kinase activator 1A;MOB kinase activator 1B	MOB1A;MOB1B			+	21.1162	22.7705	21.491	+	+				+																									cytoplasm	nucleus	1.02368	0.20095	1281	0.875	0.00744223	0.59375	0.570124	0.78125	0.0350191
Q7Z304;Q7Z304-2	MAM domain-containing protein 2	MAMDC2		+		20.9222	20.9493	24.2661																												endoplasmic reticulum		Organelli			2.14609	0.49162	936	0.53125	0.964355	0.875	0.0256507	0.828125	0.018159
Q7Z3B1;Q7Z3B1-2	Neuronal growth regulator 1	NEGR1	+			26.0027	20.5772	21.5227	+	+	+			+						Nervous system disease	Central Nervous system neoplasm		Astrocytoma	Medulloblastoma										plasma membrane							5.85552	1.2925	310	1	4.52117e-07	0.953125	2.65401e-05	0.742188	0.0705149
Q7Z3E5-2;Q7Z3E5	LisH domain-containing protein ARMC9	ARMC9		+	+	21.2525	24.0628	24.0352	+	+	+			+						Nervous system disease																			cytoplasm		1.32252	0.26549	1193	0.890625	0.00209767	0.828125	0.0204202	0.515625	0.98196
Q7Z4L5;Q7Z4L5-2	Tetratricopeptide repeat protein 21B	TTC21B		+	+	21.3727	25.7136	24.4103	+	+	+			+						Nervous system disease		epilepsy																	cytoplasm		2.52894	0.59083	848	0.96875	0.000701459	0.8125	0.0108835	0.609375	0.360224
Q7Z5P9-2;Q7Z5P9	Mucin-19	MUC19		+		21.4292	20.6383	28.5956	+			+		+						Nervous system disease														plasma membrane	Golgi			Organelli			3.42165	0.79202	666	0.65625	0.30573	0.90625	0.00680116	0.984375	0.00295387
Q7Z6Z7-2;Q7Z6Z7-3;Q7Z6Z7	E3 ubiquitin-protein ligase HUWE1	HUWE1			+	20.7333	22.1434	21.5308												Nervous system disease	Central Nervous system neoplasm		Astrocytoma	Medulloblastoma													mitochondrion	Organelli	cytoplasm	nucleus	0.501634	0.08195	1472	0.734375	0.0870693	0.75	0.115467	0.5625	0.438207
Q7Z7G0;Q7Z7G0-2;Q7Z7G0-3;Q7Z7G0-4	Target of Nesh-SH3	ABI3BP		+	+	21.2655	21.7129	25.386												Nervous system disease	Central Nervous system neoplasm		Astrocytoma																		2.01286	0.44871	974	0.515625	0.656086	0.90625	0.00249382	0.796875	0.0197212
Q7Z7M0;Q7Z7M0-2	Multiple epidermal growth factor-like domains protein 8	MEGF8	+	+	+	27.6555	21.0646	22.8905	+	+	+	+	+	+	+					Nervous system disease		epilepsy																		nucleus	10.9657	2.4206	37	1	5.6274e-08	0.984375	3.48592e-05	0.90625	0.00532338
Q86SF2	N-acetylgalactosaminyltransferase 7	GALNT7	+			23.0745	20.2547	20.8206	+	+	+			+						Nervous system disease	Central Nervous system neoplasm		Astrocytoma												Golgi			Organelli			2.63593	0.61873	825	0.8125	0.00269561	0.765625	0.012488	0.6875	0.144535
Q86SR1;Q86SR1-2;Q86SR1-3;Q86SR1-4;Q49A17-2;Q49A17	Polypeptide N-acetylgalactosaminyltransferase 10	GALNT10	+			22.9365	20.8013	22.0204	+	+				+						Nervous system disease	Central Nervous system neoplasm		Astrocytoma												Golgi			Organelli			2.70235	0.62792	818	0.90625	0.00137394	0.703125	0.158375	0.75	0.0710138
Q86T20-2						21.7556	20.579	21.6295	+	+		+		+																											8.22352	1.7817	124	1	5.50116e-05	0.640625	0.713412	0.84375	0.0117572
Q86TY3-2;Q86TY3	Uncharacterized protein C14orf37	C14orf37	+	+	+	21.9605	23.1885	21.0819												Nervous system disease																					0.39104	0.062659	1513	0.546875	0.450848	0.671875	0.40947	0.640625	0.261835
Q86UD1	Out at first protein homolog	OAF	+			25.1948	21.0665	21.1829	+	+	+			+																											4.51011	1.0193	481	1	3.39569e-08	1	2.87606e-06	0.53125	0.82188
Q86UP8-6;Q86UP8	General transcription factor II-I repeat domain-containing protein 2A	GTF2IRD2	+			26.05	20.8692	20.8185												Nervous system disease																				nucleus	3.7622	0.87241	599	0.78125	0.00291362	0.796875	0.00291452	0.507812	0.856229
Q86UX2;Q86UX2-3;Q86UX2-2;Q86UX2-4	Inter-alpha-trypsin inhibitor heavy chain H5	ITIH5	+	+	+	25.2298	21.8449	28.033	+	+	+	+	+	+	+					Nervous system disease																					9.44262	2.0958	77	0.859375	0.00481973	0.984375	0.00199868	0.9375	3.54703e-05
Q86UX7;Q86UX7-2;Q9BQL6-3	Fermitin family homolog 3	FERMT3	+	+	+	22.6458	27.7015	26.367	+	+	+			+						Nervous system disease	Central Nervous system neoplasm		Astrocytoma																cytoplasm		6.83782	1.5194	215	1	1.43663e-05	0.984375	9.23846e-06	0.703125	0.0996051
Q86VB7-3;Q86VB7;Q86VB7-2;Q86VB7-4	Scavenger receptor cysteine-rich type 1 protein M130;Soluble CD163	CD163	+		+	26.2871	21.0582	21.4333	+	+	+			+						Nervous system disease	Central Nervous system neoplasm	epilepsy	Astrocytoma	Medulloblastoma							CD163			plasma membrane							6.93254	1.5409	207	1	8.66693e-13	1	5.39554e-07	0.578125	0.534269
Q86VP6;Q86VP6-2;Q86VP6-3	Cullin-associated NEDD8-dissociated protein 1	CAND1	+	+	+	21.9032	28.4045	26.8604	+	+	+			+						Nervous system disease															Golgi			Organelli	cytoplasm	nucleus	6.22804	1.37	269	1	7.31373e-06	0.96875	3.1822e-05	0.71875	0.131629
Q86X55;Q86X55-1;Q86X55-2	Histone-arginine methyltransferase CARM1	CARM1			+	21.1426	22.6647	22.0778												Nervous system disease	Central Nervous system neoplasm		Astrocytoma																cytoplasm	nucleus	0.592898	0.095716	1443	0.796875	0.0277733	0.742188	0.0895759	0.625	0.407849
Q86XR7-2;Q9Y3B3-2;Q9Y3B3	Transmembrane emp24 domain-containing protein 7	TMED7			+	21.2562	21.6754	21.0571																										plasma membrane	Golgi	endoplasmic reticulum		Organelli			1.36919	0.27091	1182	0.640625	0.358458	0.53125	0.691035	0.640625	0.198396
Q86Y82	Syntaxin-12	STX12	+		+	21.8007	21.6642	21.7952																	Synapse										Golgi			Organelli			3.04415	0.69718	751	0.53125	0.822254	0.546875	0.993257	0.5	0.775641
Q8IUB2	WAP four-disulfide core domain protein 3	WFDC3	+			24.1561	20.684	21.0414	+	+	+			+																		I17.001									3.4644	0.8037	659	0.90625	0.00123729	0.84375	0.00347753	0.59375	0.554612
Q8IUE6	Histone H2A type 2-B	HIST2H2AB		+	+	21.0251	21.867	25.4923												Nervous system disease	Central Nervous system neoplasm																			nucleus	2.60559	0.6097	829	0.625	0.369028	0.84375	0.00281377	0.78125	0.0165136
Q8IUK5;Q8IUK5-3;Q8IUK5-2;Q8IUK5-4	Plexin domain-containing protein 1	PLXDC1	+			23.3719	20.8443	21.4062	+	+	+			+						Nervous system disease	Central Nervous system neoplasm		Astrocytoma											plasma membrane					cytoplasm		3.15221	0.72471	729	1	7.27712e-05	0.96875	0.000245529	0.648438	0.310557
Q8IUX7;Q8IUX7-2	Adipocyte enhancer-binding protein 1	AEBP1	+	+	+	25.0581	28.0725	29.1993												Nervous system disease	Central Nervous system neoplasm		Astrocytoma									M14.951							cytoplasm	nucleus	1.73479	0.36393	1066	0.75	0.0737537	1	0.00249353	0.59375	0.388504
Q8IV08	Phospholipase D3	PLD3	+		+	24.7877	21.7532	21.0707	+	+	+			+						Nervous system disease	Central Nervous system neoplasm		Astrocytoma												Golgi	endoplasmic reticulum		Organelli			4.35055	0.99065	503	0.90625	0.000907568	0.90625	0.000103612	0.640625	0.205804
Q8IVW6-3;Q8IVW6-4;Q8IVW6	AT-rich interactive domain-containing protein 3B	ARID3B	+			23.7299	20.5387	20.999	+	+	+			+						Nervous system disease	Central Nervous system neoplasm		Astrocytoma																	nucleus	3.64753	0.85685	619	1	2.26671e-05	0.96875	0.000313624	0.609375	0.300915
Q8IW52	SLIT and NTRK-like protein 4	SLITRK4	+			24.7173	20.2443	21.4911	+	+	+	+	+	+	+																			plasma membrane							10.5294	2.3088	48	1	5.27388e-08	1	1.99601e-05	0.859375	0.0096173
Q8IWA5-3;Q8IWA5;Q8IWA5-2	Choline transporter-like protein 2	SLC44A2		+	+	21.8039	22.98	24.0393												Nervous system disease	Central Nervous system neoplasm		Astrocytoma											plasma membrane			mitochondrion	Organelli			1.65753	0.34255	1093	0.703125	0.08168	0.757812	0.0178368	0.671875	0.2989
Q8IWA6	Coiled-coil domain-containing protein 60	CCDC60	+			23.3399	20.6813	21.3452												Nervous system disease																					1.81438	0.38567	1040	0.78125	0.0118044	0.71875	0.0502454	0.78125	0.124114
Q8IWY4;Q9NQ36-3;Q9NQ36-2;Q9NQ36	Signal peptide, CUB and EGF-like domain-containing protein 1;Signal peptide, CUB and EGF-like domain-containing protein 2	SCUBE1;SCUBE2		+	+	21.781	20.6648	23.6752	+			+		+						Nervous system disease	Central Nervous system neoplasm	epilepsy	Astrocytoma											plasma membrane							1.61998	0.32999	1110	0.75	0.0993327	0.75	0.0628945	0.8125	0.00837968
Q8IY31-4;Q8IY31;Q8IY31-2;Q8IY31-3	Intraflagellar transport protein 20 homolog	IFT20		+	+	21.1698	25.7786	23.6087	+	+				+						Nervous system disease															Golgi			Organelli	cytoplasm		2.84347	0.6603	784	1	2.66407e-05	0.78125	0.0470215	0.71875	0.086705
Q8IYT4-2;Q8IYT4	Katanin p60 ATPase-containing subunit A-like 2	KATNAL2		+	+	21.5231	23.2763	22.8478												Nervous system disease																			cytoplasm		1.67008	0.34692	1088	0.78125	0.047928	0.765625	0.0884722	0.5625	0.6381
Q8IZ83;Q8IZ83-3;Q8IZ83-2	Aldehyde dehydrogenase family 16 member A1	ALDH16A1		+	+	21.0909	22.3148	23.9197												Nervous system disease																					1.75041	0.37093	1059	0.671875	0.254586	0.90625	0.00259892	0.75	0.192034
Q8IZJ1;Q8IZJ1-2	Netrin receptor UNC5B	UNC5B		+		21.5494	20.5516	26.552	+			+		+					+	Nervous system disease	Central Nervous system neoplasm		Astrocytoma	Medulloblastoma										plasma membrane							8.80552	1.9747	99	0.734375	0.0607152	1	3.38697e-08	1	1.63464e-10
Q8IZP0-10;Q8IZP0-8;Q8IZP0-7;Q8IZP0-2;Q8IZP0-4;Q8IZP0-3;Q8IZP0-5;Q8IZP0-6;Q8IZP0-9;Q8IZP0-12;Q8IZP0;Q8IZP0-11	Abl interactor 1	ABI1			+	20.7061	23.31	21.0864	+	+				+						Nervous system disease					Synapse											endoplasmic reticulum		Organelli		nucleus	3.93437	0.91304	560	0.984375	0.00055397	0.65625	0.337675	0.890625	0.00396632
Q8N126-2;Q8N126;Q8N126-3	Cell adhesion molecule 3	CADM3	+		+	26.8598	24.2326	21.2576	+	+	+			+						Nervous system disease	Central Nervous system neoplasm		Astrocytoma		Synapse									plasma membrane							6.39503	1.4133	256	0.96875	0.000204235	1	5.53827e-08	0.984375	2.44338e-05
Q8N157;Q8N157-2;Q8N157-3	Jouberin	AHI1	+			29.8298	20.8532	21.2049	+	+	+			+						Nervous system disease																					8.08116	1.7541	134	1	1.23694e-09	1	3.73694e-09	0.6875	0.340627
Q8N2Q7-2;Q8N2Q7	Neuroligin-1	NLGN1	+			24.2358	21.0777	21.7221	+	+	+			+						Nervous system disease		epilepsy			Synapse							S09.994		plasma membrane	Golgi			Organelli			1.74793	0.36969	1061	0.984375	0.000231215	0.882812	0.00806386	0.609375	0.255824
Q8N3R9;Q8N3R9-2;P08908	MAGUK p55 subfamily member 5	MPP5		+	+	20.8928	23.1636	23.8757	+	+	+			+						Nervous system disease	Central Nervous system neoplasm	epilepsy	Astrocytoma		Synapse	Synaptosome			Serotonergic synapse					plasma membrane	Golgi	endoplasmic reticulum		Organelli	cytoplasm		2.56591	0.60156	839	0.890625	0.00564171	0.875	0.00377254	0.617188	0.515284
Q8N3T6	Transmembrane protein 132C	TMEM132C	+			22.89	20.8151	21.7299	+	+				+						Nervous system disease	Central Nervous system neoplasm		Astrocytoma																		2.03317	0.46058	963	0.90625	0.00249627	0.734375	0.0926798	0.703125	0.122658
Q8N436	Inactive carboxypeptidase-like protein X2	CPXM2	+	+	+	23.0388	22.1801	22.4847																								M14.955									0.991939	0.19565	1290	0.6875	0.471754	0.671875	0.683828	0.515625	0.843797
Q8N474	Secreted frizzled-related protein 1	SFRP1	+	+	+	22.0331	26.3446	25.921	+	+	+			+						Nervous system disease	Central Nervous system neoplasm	epilepsy	Astrocytoma	Medulloblastoma								I93.002		plasma membrane							3.33629	0.77623	683	0.9375	0.00018121	0.84375	0.00334244	0.5	0.686998
Q8N5K1	CDGSH iron-sulfur domain-containing protein 2	CISD2			+	20.8474	21.8108	21.5456												Nervous system disease	Central Nervous system neoplasm		Astrocytoma													endoplasmic reticulum		Organelli			0.534023	0.08786	1460	0.75	0.178598	0.6875	0.304678	0.5	0.658131
Q8N5S3	Uncharacterized protein C2orf73	C2orf73	+			24.2395	20.8005	21.547	+	+	+			+																											5.59088	1.2579	334	1	1.10137e-06	0.984375	6.24687e-05	0.726562	0.0759145
Q8NBI3	Draxin	DRAXIN	+	+	+	24.8119	21.7464	22.8725												Nervous system disease	Central Nervous system neoplasm	epilepsy		Medulloblastoma																	0.909566	0.17475	1322	0.765625	0.0191668	0.6875	0.152592	0.71875	0.152458
Q8NBI5;Q8NBI5-2	Solute carrier family 43 member 3	SLC43A3			+	21.0554	21.4102	21.8583													Central Nervous system neoplasm		Astrocytoma											plasma membrane							0.573804	0.09331	1448	0.65625	0.492521	0.703125	0.153844	0.609375	0.400839
Q8NBI6;Q8NBI6-2;Q8NBI6-3	Xyloside xylosyltransferase 1	XXYLT1	+		+	24.0798	20.6834	21.4061	+	+	+			+						Nervous system disease																endoplasmic reticulum		Organelli			3.80226	0.87981	592	1	5.45094e-07	0.984375	0.000253447	0.640625	0.254381
Q8NBJ4-2;Q8NBJ4	Golgi membrane protein 1	GOLM1	+	+	+	27.6307	25.9331	26.5738												Nervous system disease	Central Nervous system neoplasm	epilepsy	Astrocytoma											plasma membrane	Golgi	endoplasmic reticulum		Organelli			0.205121	0.027562	1574	0.671875	0.195872	0.609375	0.435054	0.625	0.727299
Q8NC51-4;Q8NC51-3;Q8NC51-2;Q8NC51	Plasminogen activator inhibitor 1 RNA-binding protein	SERBP1			+	20.4682	21.3262	21.0092												Nervous system disease	Central Nervous system neoplasm		Astrocytoma																cytoplasm	nucleus	0.287847	0.047476	1539	0.734375	0.108951	0.609375	0.408717	0.640625	0.564419
Q8NCM8;Q8NCM8-2;Q8NCM8-3	Cytoplasmic dynein 2 heavy chain 1	DYNC2H1		+	+	21.2815	25.9068	24.8104	+	+	+			+						Nervous system disease	Central Nervous system neoplasm		Astrocytoma											plasma membrane	Golgi			Organelli	cytoplasm		3.30849	0.7686	693	0.875	0.00184708	0.859375	0.0138478	0.546875	0.517352
Q8NCW5-2;Q8NCW5	NAD(P)H-hydrate epimerase	APOA1BP	+			24.5562	20.4172	20.9846	+	+	+			+						Nervous system disease		epilepsy																			5.99274	1.3211	295	0.984375	2.1696e-05	0.945312	6.48914e-05	0.65625	0.126106
Q8ND83-3;Q8ND83-2				+	+	21.3581	21.8638	24.7145																															cytoplasm		2.52012	0.58966	851	0.515625	0.6216	0.921875	0.00191788	0.8125	0.0302908
Q8NEZ3;Q8NEZ3-2	WD repeat-containing protein 19	WDR19		+	+	20.8164	23.3129	23.1415	+	+				+						Nervous system disease		epilepsy																	cytoplasm		1.44562	0.28693	1161	0.84375	0.0101395	0.828125	0.0370307	0.5	0.891758
Q8NFL0	UDP-GlcNAc:betaGal beta-1,3-N-acetylglucosaminyltransferase 7	B3GNT7	+			21.8117	20.8609	21.5831												Nervous system disease	Central Nervous system neoplasm		Astrocytoma												Golgi			Organelli			0.59901	0.096282	1440	0.828125	0.0351035	0.609375	0.633295	0.78125	0.0511771
Q8NFP4;Q8NFP4-2	MAM domain-containing glycosylphosphatidylinositol anchor protein 1	MDGA1	+			25.4197	20.547	21.7239	+	+	+	+	+	+	+					Nervous system disease					Synapse									plasma membrane	Golgi			Organelli			10.2303	2.1874	58	1	5.25075e-05	0.953125	0.000938648	0.9375	0.00564036
Q8NFY4-7;Q8NFY4-8;Q8NFY4-3;Q8NFY4-2;Q8NFY4-4;Q8NFY4-5;Q8NFY4-6;Q8NFY4	Semaphorin-6D	SEMA6D	+			24.5933	20.6891	21.4056	+	+	+			+						Nervous system disease														plasma membrane	Golgi			Organelli	cytoplasm		2.91897	0.6775	771	1	1.2318e-06	0.96875	0.000210906	0.65625	0.180776
Q8NFZ8	Cell adhesion molecule 4	CADM4	+		+	27.0479	22.1859	21.6421	+	+	+			+						Nervous system disease	Central Nervous system neoplasm																				4.65194	1.0464	463	1	3.29863e-06	1	1.77399e-07	0.65625	0.467887
Q8NHG7	Small VCP/p97-interacting protein	SVIP			+	21.234	22.7435	22.5021												Nervous system disease	Central Nervous system neoplasm		Astrocytoma											plasma membrane	Golgi	endoplasmic reticulum		Organelli			1.28521	0.25633	1201	0.84375	0.0477109	0.84375	0.0271	0.515625	0.686188
Q8NI22;Q8NI22-2;Q8NI22-3	Multiple coagulation factor deficiency protein 2	MCFD2	+			26.694	20.6466	21.6374	+	+	+			+			+			Nervous system disease															Golgi	endoplasmic reticulum		Organelli			6.1421	1.3557	278	1	2.29305e-12	1	2.55713e-08	0.78125	0.0640708
Q8TAG5;Q8TAG5-2	V-set and transmembrane domain-containing protein 2A	VSTM2A	+		+	26.5894	23.1485	20.6508	+	+	+			+						Nervous system disease	Central Nervous system neoplasm		Astrocytoma																		5.63672	1.2769	324	0.882812	0.00257915	1	2.79241e-08	0.84375	0.0197612
Q8TAG9-2;Q8TAG9	Exocyst complex component 6	EXOC6		+	+	21.9543	24.2938	29.9306												Nervous system disease														plasma membrane					cytoplasm		3.60176	0.84583	630	0.625	0.111632	0.9375	0.000302551	0.84375	0.0165899
Q8TAM6;Q8TAM6-2	Ermin	ERMN			+	21.1377	22.1525	20.4	+			+		+						Nervous system disease	Central Nervous system neoplasm		Astrocytoma	Medulloblastoma															cytoplasm		1.55815	0.31515	1129	0.796875	0.0599322	0.734375	0.17863	0.90625	0.00534825
Q8TCZ2;Q8TCZ2-2;Q8TCZ2-5;Q8TCZ2-3;Q8TCZ2-6	CD99 antigen-like protein 2	CD99L2	+	+	+	26.0764	22.4871	22.3554	+	+	+			+						Nervous system disease	Central Nervous system neoplasm		Astrocytoma											plasma membrane							3.30113	0.76532	695	0.890625	0.0012605	1	3.80133e-05	0.5	0.900233
Q8TD55;Q8TD55-2	Pleckstrin homology domain-containing family O member 2	PLEKHO2		+	+	21.4248	22.1153	21.8953												Nervous system disease																					0.627256	0.10052	1432	0.796875	0.0624635	0.625	0.410343	0.609375	0.70007
Q8TDR0-2;Q8TDR0	TRAF3-interacting protein 1	TRAF3IP1		+	+	20.6562	23.6193	23.7815	+	+	+			+						Nervous system disease																					1.51969	0.30478	1137	1	0.000413466	0.84375	0.00326331	0.601562	0.87829
Q8TEF2	Uncharacterized protein C10orf105	C10orf105			+	20.9165	22.674	20.4858	+	+		+		+																											2.8563	0.66273	782	0.828125	0.0167175	0.578125	0.363865	0.890625	0.00146833
Q8TEU8	WAP, Kazal, immunoglobulin, Kunitz and NTR domain-containing protein 2	WFIKKN2	+	+	+	28.1862	22.543	23.4567	+	+	+			+																		I02.954									4.99445	1.1211	412	1	0.000147849	0.984375	0.000184726	0.59375	0.510102
Q8WUM4;Q8WUM4-2;Q8WUM4-3	Programmed cell death 6-interacting protein	PDCD6IP		+	+	21.5765	27.3162	27.1582	+	+	+			+						Nervous system disease	Central Nervous system neoplasm	epilepsy	Astrocytoma													endoplasmic reticulum		Organelli			6.66344	1.4872	229	1	2.48524e-08	1	1.07967e-08	0.546875	0.747315
Q9HAC8;Q8WUN7	Ubiquitin domain-containing protein 1;Ubiquitin domain-containing protein 2	UBTD1;UBTD2			+	21.3186	21.6109	21.1122													Central Nervous system neoplasm		Astrocytoma																cytoplasm		0.131075	0.014237	1596	0.578125	0.463523	0.5625	0.718544	0.640625	0.394982
Q8WUW1;Q8WUW1-2	Protein BRICK1	BRK1		+	+	22.2358	23.5981	22.9072												Nervous system disease																					2.36256	0.55296	884	0.765625	0.0602699	0.71875	0.157307	0.609375	0.314295
Q8WVN6	Secreted and transmembrane protein 1	SECTM1	+			23.249	20.6847	21.673	+	+				+																				plasma membrane	Golgi			Organelli			2.83952	0.65949	787	0.859375	0.00165489	0.78125	0.0610261	0.703125	0.0680458
Q8WWI5-3;Q8WWI5-2;Q8WWI5	Choline transporter-like protein 1	SLC44A1		+	+	21.6716	22.7861	22.4073												Nervous system disease	Central Nervous system neoplasm		Astrocytoma								CD92			plasma membrane			mitochondrion	Organelli			0.362143	0.05745	1523	0.710938	0.147895	0.546875	0.396021	0.671875	0.673685
Q8WX77	Insulin-like growth factor-binding protein-like 1	IGFBPL1	+			24.3286	20.2796	21.3326	+	+	+			+						Nervous system disease	Central Nervous system neoplasm			Medulloblastoma																	3.56472	0.82887	638	0.890625	0.000689846	0.8125	0.00953034	0.75	0.0568996
Q8WXD2	Secretogranin-3	SCG3	+		+	30.9665	25.4954	21.1293	+	+	+	+	+	+	+			+		Nervous system disease	Central Nervous system neoplasm	epilepsy	Astrocytoma		Synapse											endoplasmic reticulum		Organelli			11.1469	2.4777	34	0.96875	0.000459219	1	2.69752e-12	0.9375	0.0031079
Q8WYA0;Q8WYA0-3;Q8WYA0-4	Intraflagellar transport protein 81 homolog	IFT81		+	+	21.1518	26.3635	24.5787	+	+	+			+																									cytoplasm		4.61721	1.0331	468	1	1.2047e-06	0.859375	0.00831472	0.679688	0.131775
Q8WYP5;Q8WYP5-3;Q8WYP5-2	Protein ELYS	AHCTF1	+			24.8801	20.5551	21.4003	+	+	+			+																										nucleus	7.19522	1.6008	186	1	2.30571e-07	1	8.72425e-07	0.734375	0.0898308
Q8WZA1;Q8WZA1-2	Protein O-linked-mannose beta-1,2-N-acetylglucosaminyltransferase 1	POMGNT1	+		+	24.9216	21.2633	21.9698	+	+	+			+						Nervous system disease															Golgi			Organelli			5.20886	1.1819	377	1	8.02062e-06	0.984375	7.30261e-05	0.65625	0.1932
Q92520	Protein FAM3C	FAM3C	+	+	+	30.5136	25.9503	22.9442	+	+	+			+						Nervous system disease		epilepsy													Golgi			Organelli			5.93069	1.3085	304	1	0.000388648	1	7.88795e-10	0.84375	0.0159308
Q92530	Proteasome inhibitor PI31 subunit	PSMF1	+	+	+	22.9379	23.386	23.2994													Central Nervous system neoplasm		Astrocytoma													endoplasmic reticulum		Organelli	cytoplasm		0.0126863	0.00095222	1620	0.53125	0.686256	0.53125	0.734747	0.515625	0.933582
Q92542-2;Q92542	Nicastrin	NCSTN		+	+	21.4043	24.3097	22.523	+	+				+						Nervous system disease	Central Nervous system neoplasm		Astrocytoma		Synapse									plasma membrane	Golgi	endoplasmic reticulum	mitochondrion	Organelli			3.30467	0.76611	694	0.953125	0.000386747	0.703125	0.129862	0.8125	0.0258727
Q92563;Q92563-2	Testican-2	SPOCK2	+	+	+	23.7073	22.3783	21.1246												Nervous system disease	Central Nervous system neoplasm		Astrocytoma									I31.954									1.81434	0.38483	1041	0.5625	0.436208	0.671875	0.101439	0.664062	0.293841
Q92597;Q92597-3;Q92597-2	Protein NDRG1	NDRG1	+	+	+	21.5601	24.2696	23.5693	+	+	+			+						Nervous system disease	Central Nervous system neoplasm	epilepsy	Astrocytoma									S33.988		plasma membrane					cytoplasm	nucleus	1.50092	0.29928	1143	0.90625	0.00472953	0.890625	0.00697597	0.5625	0.468866
Q92624	Amyloid protein-binding protein 2	APPBP2	+	+	+	20.3136	23.637	23.253	+	+				+																									cytoplasm	nucleus	1.60196	0.32595	1116	0.90625	0.00979793	0.828125	0.031931	0.53125	0.786888
Q92626;Q92626-2	Peroxidasin homolog	PXDN	+	+	+	24.4681	22.4801	23.0875												Nervous system disease	Central Nervous system neoplasm	epilepsy	Astrocytoma	Medulloblastoma												endoplasmic reticulum		Organelli			1.39793	0.2777	1175	0.84375	0.0421866	0.71875	0.237306	0.5625	0.581497
Q92743	Serine protease HTRA1	HTRA1	+	+	+	27.0615	26.4239	29.2036	+			+		+						Nervous system disease	Central Nervous system neoplasm											S01.277		plasma membrane							2.81016	0.65004	796	0.65625	0.20291	1	6.75027e-06	1	6.0751e-05
Q92752;Q92752-2	Tenascin-R	TNR	+	+	+	25.8895	22.5572	23.2764	+	+	+			+						Nervous system disease	Central Nervous system neoplasm		Astrocytoma	Medulloblastoma	Synapse																1.26189	0.24753	1213	0.828125	0.00999656	0.890625	0.004379	0.625	0.580846
Q92783-2;Q92783;O75886	Signal transducing adapter molecule 1	STAM			+	21.9592	22.0681	21.1643												Nervous system disease	Central Nervous system neoplasm		Astrocytoma																cytoplasm		0.605585	0.096489	1438	0.515625	0.862314	0.703125	0.152185	0.78125	0.144381
Q92820	Gamma-glutamyl hydrolase	GGH	+	+	+	26.4645	22.5042	21.7334	+	+	+			+						Nervous system disease	Central Nervous system neoplasm		Astrocytoma									C26.001								nucleus	4.24219	0.96318	522	0.929688	0.000387159	0.9375	8.12196e-05	0.65625	0.480802
Q92823;Q92823-3;Q92823-6;Q92823-2;Q92823-5;Q92823-4	Neuronal cell adhesion molecule	NRCAM	+	+	+	31.3046	23.9023	22.6946	+	+	+			+						Nervous system disease	Central Nervous system neoplasm	epilepsy	Astrocytoma											plasma membrane							8.15974	1.7718	128	1	2.01587e-09	1	4.85148e-10	0.679688	0.127618
Q92859-3;Q92859-2;Q92859-4;Q92859	Neogenin	NEO1	+	+	+	30.5399	24.0694	25.6219	+	+	+			+						Nervous system disease	Central Nervous system neoplasm		Astrocytoma	Medulloblastoma										plasma membrane	Golgi			Organelli			2.37791	0.55791	880	1	0.000105437	0.828125	0.014267	0.5625	0.452747
Q92876;Q92876-2	Kallikrein-6	KLK6	+	+	+	28.7554	22.6341	22.5096	+	+	+			+						Nervous system disease	Central Nervous system neoplasm		Astrocytoma	Medulloblastoma								S01.236				endoplasmic reticulum	mitochondrion	Organelli	cytoplasm		3.28641	0.76116	699	0.9375	0.00113707	0.921875	0.000431512	0.515625	0.931243
Q92882	Osteoclast-stimulating factor 1	OSTF1			+	21.6356	22.9004	21.9821												Nervous system disease	Central Nervous system neoplasm		Astrocytoma																		0.337997	0.053601	1528	0.71875	0.100101	0.59375	0.662453	0.679688	0.259038
Q92905	COP9 signalosome complex subunit 5	COPS5			+	21.1694	22.731	21.0998												Nervous system disease	Central Nervous system neoplasm	epilepsy	Astrocytoma		Synapse							M67.002							cytoplasm	nucleus	0.805566	0.14122	1363	0.71875	0.0851139	0.546875	0.893392	0.71875	0.0567014
Q92911	Sodium/iodide cotransporter	SLC5A5	+	+	+	23.3733	32.9285	31.7199	+	+	+			+						Nervous system disease	Central Nervous system neoplasm		Astrocytoma	Medulloblastoma										plasma membrane					cytoplasm	nucleus	8.84011	1.9769	98	1	3.8133e-11	1	1.09337e-09	0.84375	0.0340508
Q92930	Ras-related protein Rab-8B	RAB8B		+	+	21.5286	22.6854	21.4057												Nervous system disease					Synapse									plasma membrane	Golgi			Organelli	cytoplasm		0.444233	0.07184	1493	0.875	0.0307992	0.578125	0.869832	0.65625	0.0498448
Q92932-3;Q92932-4;Q92932;Q92932-2	Receptor-type tyrosine-protein phosphatase N2	PTPRN2	+		+	26.7224	22.0787	21.7013	+	+	+			+						Nervous system disease	Central Nervous system neoplasm		Astrocytoma	Medulloblastoma	Synapse									plasma membrane							5.55306	1.2514	339	0.953125	0.000214085	1	4.49926e-07	0.578125	0.664097
Q92954-3;Q92954-6;Q92954;Q92954-5;Q92954-4;Q92954-2	Proteoglycan 4;Proteoglycan 4 C-terminal part	PRG4	+	+	+	23.6612	23.5041	24.6719												Nervous system disease	Central Nervous system neoplasm																				0.0821291	0.0081583	1606	0.5625	0.929868	0.53125	0.541696	0.617188	0.562792
Q93008-1;Q93008;O00507;O00507-2	Probable ubiquitin carboxyl-terminal hydrolase FAF-X	USP9X			+	21.4289	22.0963	20.4931												Nervous system disease	Central Nervous system neoplasm		Astrocytoma	Medulloblastoma								C19.017;C19.028							cytoplasm	nucleus	0.909066	0.17449	1323	0.625	0.34524	0.8125	0.0401643	0.8125	0.0328271
Q93091	Ribonuclease K6	RNASE6	+	+		24.1185	20.5232	22.1153	+	+		+		+							Central Nervous system neoplasm		Astrocytoma																cytoplasm		3.51036	0.82073	646	0.828125	0.00358585	0.71875	0.0937208	0.96875	0.00706158
Q969E2-2;Q969E2	Secretory carrier-associated membrane protein 4	SCAMP4		+	+	21.5462	22.9293	23.2317													Central Nervous system neoplasm		Astrocytoma												Golgi			Organelli			0.716607	0.12251	1392	0.734375	0.0977145	0.84375	0.0103634	0.578125	0.71421
Q969P0;Q969P0-3;Q969P0-2	Immunoglobulin superfamily member 8	IGSF8	+	+	+	26.4301	21.565	22.2951	+	+	+			+						Nervous system disease	Central Nervous system neoplasm		Astrocytoma								CD316			plasma membrane							2.8032	0.64395	799	1	1.21946e-05	0.875	0.00164824	0.523438	0.538958
Q969X1	Protein lifeguard 3	TMBIM1		+	+	21.5249	23.2131	24.8602	+		+			+						Nervous system disease														plasma membrane	Golgi	endoplasmic reticulum		Organelli			3.79533	0.87947	593	0.804688	0.0342708	0.984375	1.77934e-05	0.765625	0.0427206
Q96AP7	Endothelial cell-selective adhesion molecule	ESAM	+			24.5724	20.8863	21.8083	+	+	+			+						Nervous system disease	Central Nervous system neoplasm													plasma membrane							4.22153	0.95391	527	1	3.84695e-08	1	0.000101534	0.78125	0.0756849
Q96AQ6;Q96AQ6-2;Q96AQ6-3	Pre-B-cell leukemia transcription factor-interacting protein 1	PBXIP1		+	+	21.7863	23.5837	21.9609												Nervous system disease	Central Nervous system neoplasm	epilepsy	Astrocytoma																	nucleus	0.529418	0.086609	1462	0.765625	0.0572208	0.523438	0.849356	0.734375	0.18617
Q96B02	Ubiquitin-conjugating enzyme E2 W	UBE2W	+		+	25.8051	20.9942	21.5805	+	+	+			+						Nervous system disease																			cytoplasm	nucleus	3.27806	0.76022	701	0.9375	0.000549607	0.984375	0.000127973	0.703125	0.538752
Q96B86-3;Q96B86;Q96B86-4	Repulsive guidance molecule A	RGMA	+			24.1619	20.753	21.1728	+	+	+			+						Nervous system disease	Central Nervous system neoplasm	epilepsy	Astrocytoma											plasma membrane		endoplasmic reticulum		Organelli			6.92199	1.5323	211	1	3.63737e-06	0.96875	3.11828e-05	0.75	0.134258
Q96C19;Q9BUP0-2;Q9BUP0	EF-hand domain-containing protein D2;EF-hand domain-containing protein D1	EFHD2;EFHD1	+		+	21.8499	22.3282	21.4087												Nervous system disease	Central Nervous system neoplasm	epilepsy	Astrocytoma	Medulloblastoma	Synapse												mitochondrion	Organelli			1.70425	0.35822	1078	0.671875	0.208315	0.625	0.337444	0.84375	0.0254375
Q96CG8-3;Q96CG8;Q96CG8-2	Collagen triple helix repeat-containing protein 1	CTHRC1	+	+	+	23.6389	21.7461	21.8136												Nervous system disease	Central Nervous system neoplasm		Astrocytoma	Medulloblastoma																	1.06194	0.20892	1268	0.796875	0.0487561	0.78125	0.0479773	0.5	0.94467
Q96CW1-2;Q96CW1	AP-2 complex subunit mu	AP2M1		+	+	21.204	22.4094	22.2406	+	+				+						Nervous system disease	Central Nervous system neoplasm	epilepsy	Astrocytoma		Synapse									plasma membrane					cytoplasm		1.92273	0.42216	1001	0.898438	0.00625623	0.75	0.062263	0.5625	0.752137
Q96CX2;Q6ZWB6	BTB/POZ domain-containing protein KCTD12	KCTD12	+	+	+	22.5203	23.7824	22.4703												Nervous system disease	Central Nervous system neoplasm	epilepsy	Astrocytoma		Synapse																0.386003	0.062436	1515	0.65625	0.199559	0.515625	0.964508	0.703125	0.153885
Q96D96-4;Q96D96;Q96D96-3;Q96D96-2	Voltage-gated hydrogen channel 1	HVCN1		+	+	20.7424	25.4742	24.5352	+	+	+			+						Nervous system disease	Central Nervous system neoplasm		Astrocytoma											plasma membrane							4.59889	1.0284	473	1	3.81581e-06	0.921875	0.00161613	0.546875	0.42138
Q96DG6	Carboxymethylenebutenolidase homolog	CMBL		+	+	21.4485	21.6289	22.5138												Nervous system disease	Central Nervous system neoplasm		Astrocytoma																		0.233094	0.029324	1567	0.59375	0.760091	0.796875	0.0460796	0.75	0.163966
Q96FA3	E3 ubiquitin-protein ligase pellino homolog 1	PELI1	+		+	27.1608	22.4627	21.6601	+	+	+			+						Nervous system disease																				nucleus	4.10488	0.94141	540	0.921875	0.00168648	0.9375	0.000102688	0.515625	0.425156
Q96FE5-2;Q96FE5	Leucine-rich repeat and immunoglobulin-like domain-containing nogo receptor-interacting protein 1	LINGO1	+			24.6402	20.9819	21.9168	+	+				+						Nervous system disease	Central Nervous system neoplasm		Astrocytoma	Medulloblastoma										plasma membrane							2.28953	0.53195	902	0.875	0.00260016	0.828125	0.0255605	0.65625	0.194666
Q96FE7-4;Q96FE7-2;Q96FE7;Q96FE7-5	Phosphoinositide-3-kinase-interacting protein 1	PIK3IP1	+		+	26.2923	21.0558	21.1736	+	+	+			+																				plasma membrane							7.71577	1.6778	157	1	6.35498e-07	1	1.56224e-08	0.59375	0.848193
Q96FJ2	Dynein light chain 2, cytoplasmic	DYNLL2		+	+	21.4679	23.7042	23.8841												Nervous system disease					Synapse									plasma membrane					cytoplasm	nucleus	1.16063	0.22731	1243	0.796875	0.0495013	0.84375	0.00659173	0.515625	0.881823
Q96FN4;Q96FN4-2	Copine-2	CPNE2		+	+	21.6328	22.3663	23.899																										plasma membrane					cytoplasm	nucleus	1.27576	0.25148	1208	0.703125	0.100137	0.90625	0.00789273	0.84375	0.0402496
Q96FQ6	Protein S100-A16	S100A16			+	21.3524	23.0469	21.7543	+	+				+						Nervous system disease	Central Nervous system neoplasm		Astrocytoma											plasma membrane					cytoplasm	nucleus	0.792922	0.13773	1371	0.890625	0.0134972	0.640625	0.35521	0.765625	0.049598
Q96FW1;Q96FW1-2	Ubiquitin thioesterase OTUB1	OTUB1	+	+	+	21.242	24.757	24.1682	+	+	+			+						Nervous system disease	Central Nervous system neoplasm											C65.001								nucleus	2.4113	0.56399	873	0.953125	0.00115226	0.875	0.00432586	0.5625	0.586855
Q96G03;Q96G03-2;Q13547	Phosphoglucomutase-2	PGM2	+		+	21.509	23.4297	22.5224												Nervous system disease	Central Nervous system neoplasm	epilepsy	Astrocytoma	Medulloblastoma															cytoplasm	nucleus	0.431615	0.069318	1497	0.6875	0.075429	0.609375	0.222962	0.59375	0.431763
Q96GD0	Pyridoxal phosphate phosphatase	PDXP	+	+	+	22.6072	21.4593	23.6887												Nervous system disease	Central Nervous system neoplasm	epilepsy	Astrocytoma																cytoplasm		0.975166	0.1903	1298	0.640625	0.145406	0.734375	0.226142	0.8125	0.0133996
Q96GG9;Q6PH85-2;Q6PH85	DCN1-like protein 1	DCUN1D1			+	21.2249	21.9385	22.5585												Nervous system disease	Central Nervous system neoplasm		Astrocytoma																cytoplasm	nucleus	0.322381	0.050111	1534	0.65625	0.306063	0.75	0.0408909	0.59375	0.439687
Q96GW7;Q96GW7-2	Brevican core protein	BCAN	+	+	+	29.3614	26.755	24.9942	+	+	+			+						Nervous system disease	Central Nervous system neoplasm		Astrocytoma												Golgi			Organelli			1.80666	0.38	1047	0.828125	0.0186655	0.96875	0.000865802	0.671875	0.210869
Q96HC4-7;Q96HC4-4;Q96HC4;Q96HC4-6;Q96HC4-2;Q96HC4-5	PDZ and LIM domain protein 5	PDLIM5		+	+	21.1322	22.643	22.2699												Nervous system disease	Central Nervous system neoplasm		Astrocytoma		Synapse																0.911933	0.17551	1321	0.796875	0.0232761	0.671875	0.17792	0.609375	0.614147
Q96IY4;Q96IY4-2;CON__Q2KIG3	Carboxypeptidase B2	CPB2	+	+	+	26.2361	21.5937	25.0089	+	+				+						Nervous system disease	Central Nervous system neoplasm		Astrocytoma									M14.009									2.36726	0.5535	883	0.96875	6.09592e-05	0.5625	0.325002	0.78125	0.0224916
Q96JF0;Q96JF0-2	Beta-galactoside alpha-2,6-sialyltransferase 2	ST6GAL2	+		+	24.8727	21.846	21.8375	+	+	+			+						Nervous system disease	Central Nervous system neoplasm														Golgi			Organelli			3.13668	0.72265	731	0.921875	0.000668522	0.953125	0.00070076	0.507812	0.991469
Q96JQ0	Protocadherin-16	DCHS1			+	20.9483	21.5444	21.7178												Nervous system disease																					0.262754	0.038388	1557	0.578125	0.358326	0.671875	0.185265	0.5	0.812166
Q96K17;Q96K17-2	Transcription factor BTF3 homolog 4	BTF3L4		+	+	21.9775	24.0709	22.2422																																	0.693638	0.11807	1403	0.796875	0.0447882	0.5	0.749196	0.71875	0.146724
Q96KN2	Beta-Ala-His dipeptidase	CNDP1	+	+	+	27.7071	23.8237	25.973												Nervous system disease	Central Nervous system neoplasm		Astrocytoma	Medulloblastoma								M20.006									0.976272	0.19099	1297	0.78125	0.0512421	0.695312	0.335574	0.65625	0.172908
Q96KP4;Q96KP4-2	Cytosolic non-specific dipeptidase	CNDP2	+	+	+	23.0672	24.4919	26.0364												Nervous system disease	Central Nervous system neoplasm		Astrocytoma									M20.005									0.804229	0.14111	1364	0.75	0.129077	0.71875	0.067279	0.671875	0.27048
Q96LB3;Q96LB3-2	Intraflagellar transport protein 74 homolog	IFT74		+	+	20.8966	26.1133	24.4094	+	+	+			+						Nervous system disease																				nucleus	3.67555	0.86106	612	0.984375	3.28124e-05	0.875	0.0045548	0.671875	0.221999
Q96NN9-3;Q96NN9-2;Q96NN9	Apoptosis-inducing factor 3	AIFM3		+	+	21.2085	22.5783	23.577												Nervous system disease	Central Nervous system neoplasm		Astrocytoma	Medulloblastoma												endoplasmic reticulum	mitochondrion	Organelli	cytoplasm		2.18636	0.49805	926	0.78125	0.0643164	0.921875	0.00110512	0.71875	0.184429
Q96NY7-2;Q96NY7;Q9NZA1-3;Q9NZA1-2;Q9NZA1	Chloride intracellular channel protein 6	CLIC6		+	+	21.4234	31.5405	27.7851	+	+	+	+	+	+	+					Nervous system disease														plasma membrane	Golgi			Organelli	cytoplasm		13.5572	2.8255	10	1	2.99637e-11	1	5.69254e-06	0.9375	0.000720604
Q96NZ9;Q96NZ9-4;Q96NZ9-3;Q96NZ9-2	Proline-rich acidic protein 1	PRAP1	+		+	26.1048	22.832	21.099	+	+	+			+						Nervous system disease																endoplasmic reticulum		Organelli			4.12654	0.94561	537	0.859375	0.00469577	1	5.64855e-07	0.6875	0.114785
Q96PD5;Q96PD5-2;CON__ENSEMBL:ENSBTAP00000016285	N-acetylmuramoyl-L-alanine amidase	PGLYRP2	+	+	+	29.4233	24.2479	26.0318	+	+	+			+						Nervous system disease	Central Nervous system neoplasm		Astrocytoma																		2.35875	0.55044	886	0.96875	0.000179813	0.953125	0.00171926	0.6875	0.163183
Q96PX8	SLIT and NTRK-like protein 1	SLITRK1	+			26.3913	20.8502	21.4898	+	+	+			+			+								Synapse									plasma membrane							7.09034	1.5851	192	1	5.9642e-12	1	1.84919e-09	0.875	0.0764865
Q96PY5-3;Q96PY5	Formin-like protein 2	FMNL2		+	+	21.3998	20.8183	24.2419	+			+		+						Nervous system disease	Central Nervous system neoplasm		Astrocytoma																		3.06988	0.70767	742	0.625	0.269281	0.90625	0.00186363	0.96875	0.000178416
Q96Q89-4;Q96Q89-3;Q96Q89;Q96Q89-2	Kinesin-like protein KIF20B	KIF20B		+	+	20.9268	26.5472	27.4599	+	+	+			+						Nervous system disease	Central Nervous system neoplasm		Astrocytoma																cytoplasm	nucleus	4.64544	1.0433	465	0.984375	1.43804e-05	1	2.43874e-07	0.640625	0.382702
Q96QK1	Vacuolar protein sorting-associated protein 35	VPS35			+	21.1043	23.2116	21.9441	+	+				+						Nervous system disease																	mitochondrion	Organelli	cytoplasm		1.22867	0.23765	1224	0.828125	0.0108778	0.703125	0.190316	0.765625	0.0566788
Q96RQ9;Q96RQ9-2	L-amino-acid oxidase	IL4I1			+	21.1017	22.0478	21.6617												Nervous system disease	Central Nervous system neoplasm																				2.34046	0.54195	893	0.765625	0.11727	0.6875	0.398885	0.671875	0.54915
Q96RW7;Q96RW7-2;Q96RW7-3	Hemicentin-1	HMCN1		+		21.3397	20.6911	23.7354												Nervous system disease																			cytoplasm		1.47016	0.28869	1157	0.609375	0.227242	0.734375	0.0615119	0.921875	0.0159001
Q96RY7;Q96RY7-2	Intraflagellar transport protein 140 homolog	IFT140		+	+	21.4151	23.5293	23.4039	+	+				+						Nervous system disease																					1.17853	0.23025	1239	0.8125	0.0210527	0.78125	0.0528116	0.570312	0.912525
Q96S96	Phosphatidylethanolamine-binding protein 4	PEBP4	+			26.131	20.1779	21.42	+	+	+			+						Nervous system disease	Central Nervous system neoplasm																				5.15663	1.168	385	0.96875	6.0773e-06	0.90625	0.000163917	0.75	0.0490632
Q96T52-2;Q96T52	Mitochondrial inner membrane protease subunit 2	IMMP2L		+		20.4581	20.9702	25.9304	+			+		+						Nervous system disease												S26.A09									5.68993	1.2803	319	0.640625	0.406484	0.96875	0.000150554	1	8.27527e-05
Q96TA1-2;Q96TA1	Niban-like protein 1	FAM129B			+	20.4767	23.791	21.0696	+	+				+						Nervous system disease														plasma membrane					cytoplasm	nucleus	3.08407	0.7142	738	1	8.17564e-06	0.609375	0.287179	0.953125	0.000398061
Q99435-4;Q99435;Q99435-2;Q99435-3	Protein kinase C-binding protein NELL2	NELL2	+	+	+	30.4255	23.6114	26.3168	+	+	+			+						Nervous system disease	Central Nervous system neoplasm	epilepsy	Astrocytoma	Medulloblastoma																	5.93574	1.3087	303	1	1.93634e-06	1	2.04849e-05	0.875	0.00851347
Q99436;Q99436-2	Proteasome subunit beta type-7	PSMB7	+		+	23.0383	22.3164	21.3678												Nervous system disease	Central Nervous system neoplasm		Astrocytoma									T01.011							cytoplasm	nucleus	1.28329	0.25535	1202	0.6875	0.239452	0.8125	0.0183138	0.84375	0.0194584
Q99460-2;Q99460	26S proteasome non-ATPase regulatory subunit 1	PSMD1		+	+	22.6034	23.722	21.7405												Nervous system disease	Central Nervous system neoplasm		Astrocytoma																	nucleus	2.8426	0.66008	785	0.625	0.153489	0.75	0.0680191	0.820312	0.0301713
Q99497	Protein deglycase DJ-1	PARK7	+	+	+	26.6265	27.4969	25.0692	+			+		+						Nervous system disease	Central Nervous system neoplasm	epilepsy	Astrocytoma	Medulloblastoma	Synapse							C56.002		plasma membrane		endoplasmic reticulum	mitochondrion	Organelli	cytoplasm	nucleus	2.90069	0.67117	774	0.78125	0.105052	0.78125	0.044555	0.984375	0.00118824
Q99536;Q99536-3;Q99536-2	Synaptic vesicle membrane protein VAT-1 homolog	VAT1			+	20.9759	24.1095	21.793	+	+				+							Central Nervous system neoplasm		Astrocytoma		Synapse																3.76691	0.87282	597	1	2.14509e-06	0.671875	0.143441	0.921875	0.000925242
Q99538;Q99538-2;Q99538-3	Legumain	LGMN	+	+	+	25.3364	22.6237	21.4873												Nervous system disease	Central Nervous system neoplasm	epilepsy	Astrocytoma		Synapse							C13.004							cytoplasm		2.53593	0.59256	845	0.765625	0.0252974	0.859375	0.00243726	0.71875	0.338424
Q99574	Neuroserpin	SERPINI1	+			27.2386	20.106	21.7178	+	+	+	+	+	+	+					Nervous system disease	Central Nervous system neoplasm	epilepsy	Astrocytoma	Medulloblastoma	Synapse							I04.025							cytoplasm		11.5476	2.5452	30	1	9.29767e-11	1	3.64538e-07	0.890625	0.00920748
Q99584	Protein S100-A13	S100A13			+	21.5404	22.167	20.3391												Nervous system disease	Central Nervous system neoplasm		Astrocytoma											plasma membrane					cytoplasm	nucleus	1.72343	0.3629	1069	0.71875	0.178302	0.828125	0.0143695	1	6.11415e-05
Q99627;Q99627-2	COP9 signalosome complex subunit 8	COPS8			+	21.183	25.2018	21.7781	+	+				+																									cytoplasm	nucleus	4.30969	0.98134	511	1	0.000362098	0.625	0.286593	0.921875	0.00247699
Q99674;Q99674-2;Q99674-3	Cell growth regulator with EF hand domain protein 1	CGREF1	+		+	27.2354	20.617	21.9554	+	+	+			+																											6.44593	1.4245	250	1	9.45046e-09	1	1.75312e-07	0.796875	0.0572365
Q99685-2;Q99685	Monoglyceride lipase	MGLL			+	20.8745	21.983	21.0886												Nervous system disease	Central Nervous system neoplasm	epilepsy	Astrocytoma	Medulloblastoma								S33.979		plasma membrane		endoplasmic reticulum		Organelli			1.32744	0.26597	1192	0.765625	0.0853711	0.59375	0.725548	0.671875	0.20161
[truncated: 207 more rows]
[truncated: 12 more columns]

## Sheet: Table S2
Table S2. List of 88 proteins that maximize discrimination between the three different fractions. For each protein is reported ANOVA P-value (-Log10), VIP-score, SVM rank, and the result of ROC analysis for each comparison.
[truncated: 89 more rows]

## Sheet: Table S3
Table S3. Two-dimensional enrichment analysis between total and microvesicle fractions. List of all statistically significant Gene Ontology (GO) terms enriched in the comparison between total (Tot) and microvesicle (Mv) samples. For each term is reported the eriched score, its P-value afther FDR correction for multiple interaction and the type of GO. The symbol "+" indicate the GO terms enriched …
[truncated: 50 more rows]

[truncated: 2 more sheets: Table S4, Table S5]
